# Supplementary material for: Effectiveness of lipid-lowering therapy on mortality and major adverse cardiovascular event outcomes in patients undergoing percutaneous coronary intervention: a network meta-analysis of randomised controlled trials
Source: PubMed Central journal article supplement — BMJ Open. 2023 Nov 15;13(11):e070827. doi: 10.1136/bmjopen-2022-070827 (PMC10660972; doi:10.1136/bmjopen-2022-070827), 2023-11-15
Supplement: bmjopen-2022-070827.draft_revisions.pdf [file bmjopen-2022-070827.draft_revisions.pdf]

# BMJ Open

BMJ Open is committed to open peer review. As part of this commitment we make the peer review history of every article we publish publicly available.

When an article is published we post the peer reviewers' comments and the authors' responses online. We also post the versions of the paper that were used during peer review. These are the versions that the peer review comments apply to.

The versions of the paper that follow are the versions that were submitted during the peer review process. They are not the versions of record or the final published versions. They should not be cited or distributed as the published version of this manuscript.

BMJ Open is an open access journal and the full, final, typeset and author-corrected version of record of the manuscript is available on our site with no access controls, subscription charges or pay-per-view fees (<http://bmjopen.bmj.com>).

If you have any questions on BMJ Open's open peer review process please email [info.bmjopen@bmj.com](mailto:info.bmjopen@bmj.com)

# BMJ Open

## Effectiveness of lipid-lowering therapy on mortality and major adverse cardiovascular event outcomes in patients undergoing percutaneous coronary intervention: a network meta-analysis of randomized controlled trials

|                               |                                                                                                                                                                                                                                                                                                                                                                                                                                                                                                                                                                                                                                                                                                                                                                                                                                                                                                              |
|-------------------------------|--------------------------------------------------------------------------------------------------------------------------------------------------------------------------------------------------------------------------------------------------------------------------------------------------------------------------------------------------------------------------------------------------------------------------------------------------------------------------------------------------------------------------------------------------------------------------------------------------------------------------------------------------------------------------------------------------------------------------------------------------------------------------------------------------------------------------------------------------------------------------------------------------------------|
| Journal:                      | <i>BMJ Open</i>                                                                                                                                                                                                                                                                                                                                                                                                                                                                                                                                                                                                                                                                                                                                                                                                                                                                                              |
| Manuscript ID                 | bmjopen-2022-070827                                                                                                                                                                                                                                                                                                                                                                                                                                                                                                                                                                                                                                                                                                                                                                                                                                                                                          |
| Article Type:                 | Original research                                                                                                                                                                                                                                                                                                                                                                                                                                                                                                                                                                                                                                                                                                                                                                                                                                                                                            |
| Date Submitted by the Author: | 07-Dec-2022                                                                                                                                                                                                                                                                                                                                                                                                                                                                                                                                                                                                                                                                                                                                                                                                                                                                                                  |
| Complete List of Authors:     | Deng, changjiang; Xinjiang Medical University Affiliated First Hospital, Department of Cardiology<br>Yan, Ju; Xinjiang Medical University Affiliated First Hospital, The First Department of Coronary Artery Disease<br>Zheng, Ying-Ying; Xinjiang Medical University Affiliated First Hospital<br>Wu, Ting-Ting; Xinjiang Medical University Affiliated First Hospital<br>Pan, Ying; Xinjiang Medical University Affiliated First Hospital, Department of Cardiology<br>Hou, Xian-Geng; Xinjiang Medical University Affiliated First Hospital<br>Wang, Si-Fan; Xinjiang Medical University Affiliated First Hospital, Department of Cardiology<br>Sirajidin, Subinur; Xinjiang Medical University Affiliated First Hospital<br>Aimaitijiang, Mikereyi; Xinjiang Medical University Affiliated First Hospital<br>Xie, Xiang; Xinjiang Medical University Affiliated First Hospital, Department of Cardiology |
| Keywords:                     | Coronary intervention < CARDIOLOGY, CLINICAL PHARMACOLOGY, Coronary heart disease < CARDIOLOGY                                                                                                                                                                                                                                                                                                                                                                                                                                                                                                                                                                                                                                                                                                                                                                                                               |
|                               |                                                                                                                                                                                                                                                                                                                                                                                                                                                                                                                                                                                                                                                                                                                                                                                                                                                                                                              |

SCHOLARONE™  
Manuscripts

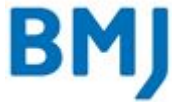

I, the Submitting Author has the right to grant and does grant on behalf of all authors of the Work (as defined in the below author licence), an exclusive licence and/or a non-exclusive licence for contributions from authors who are: i) UK Crown employees; ii) where BMJ has agreed a CC-BY licence shall apply, and/or iii) in accordance with the terms applicable for US Federal Government officers or employees acting as part of their official duties; on a worldwide, perpetual, irrevocable, royalty-free basis to BMJ Publishing Group Ltd ("BMJ") its licensees and where the relevant Journal is co-owned by BMJ to the co-owners of the Journal, to publish the Work in this journal and any other BMJ products and to exploit all rights, as set out in our [licence](#).

The Submitting Author accepts and understands that any supply made under these terms is made by BMJ to the Submitting Author unless you are acting as an employee on behalf of your employer or a postgraduate student of an affiliated institution which is paying any applicable article publishing charge ("APC") for Open Access articles. Where the Submitting Author wishes to make the Work available on an Open Access basis (and intends to pay the relevant APC), the terms of reuse of such Open Access shall be governed by a Creative Commons licence – details of these licences and which [Creative Commons](#) licence will apply to this Work are set out in our licence referred to above.

Other than as permitted in any relevant BMJ Author's Self Archiving Policies, I confirm this Work has not been accepted for publication elsewhere, is not being considered for publication elsewhere and does not duplicate material already published. I confirm all authors consent to publication of this Work and authorise the granting of this licence.

1  
2  
3  
4 1 **Effectiveness of lipid-lowering therapy on mortality and**  
5  
6  
7 2 **major adverse cardiovascular event outcomes in patients**  
8  
9 3 **undergoing percutaneous coronary intervention: a network**  
10  
11 4 **meta-analysis of randomized controlled trials**

14 Chang-Jiang Deng, Ju Yan, Ying-Ying Zheng, Ting-Ting Wu, Ying Pan, Xian-Geng  
15  
16 Hou, Si-Fan Wang, Subinur Sirajidin, Mikereyi Aimaitijiang, Xiang Xie

17  
18 7 Department of Cardiology, The First Affiliated Hospital of Xinjiang Medical  
19  
20  
21 8 University, Urumqi, 830011, P.R. China.

22  
23 9 Correspondence authors:

24  
25  
26 10 Xiang Xie, No. 137, Liyushan Road, Department of Cardiology, First Affiliated  
27  
28  
29 11 Hospital of Xinjiang Medical University, Urumqi, 830011 P.R., China. Tel:  
30  
31 12 +8609914366168; Email: xiangxie999@sina.com  
32  
33

34 13

35  
36 14 **Abstract**

37  
38  
39 15 **Objective**

40  
41  
42 16 This study will assess the benefits of different lipid-lowering regimens on the risk of  
43  
44 17 MACEs and mortality in the post-PCI population by network meta-analysis.

45  
46  
47 18 **Methods**

48  
49 19 Public literature databases, including PubMed, Embase, and the Cochrane Library,  
50  
51  
52 20 were searched from inception to August 2022. Randomized controlled trials (RCTs)  
53  
54 21 on lipid-lowering regimens in post-PCI populations were included and analyzed. The  
55  
56  
57 22 outcomes were the incidence of all-cause mortality and MACE, whether reported as  
58  
59  
60

23 dichotomous or hazard ratio (HR) statistics.

## 24 **Results**

25 Thirty-nine RCTs were included. For MACEs, alirocumab plus rosuvastatin (OR:  
26 0.18; 95% CI: 0.07-0.44;), evolocumab plus ezetimibe and statins (OR: 0.19; 95%  
27 CI:0.06-0.59), eicosapentaenoic acid (EPA) plus pitavastatin (HR: 0.67; 95% CI:  
28 0.49-0.96), and icosapent ethyl plus statins (HR: 0.73; 95% CI: 0.62-0.86) had  
29 significant advantages and relatively high rankings. For mortality, rosuvastatin (OR:  
30 0.30; 95% CI: 0.11-0.84), ezetimibe plus statins (OR: 0.55; 95% CI: 0.43-0.89) and  
31 icosapent ethyl plus statins (OR: 0.66; 95% CI: 0.45-0.96) had significant advantages  
32 compared to the control.

## 33 **Conclusion**

34 EPA, especially icosapent ethyl, plus statins had a beneficial effect on reducing the  
35 risk of MACEs and mortality in post-PCI patients. PCSK9i plus statins was able to  
36 reduce the risk of MACEs, but the risk of mortality remained unclear.

37 **Key words:**lipid-lowering therapy, major adverse cardiovascular events, mortality,  
38 network meta-analysis

## 41 **Introduction**

42 Acute coronary syndrome (ACS) is a term used to refer to a range of conditions  
43 associated with acute myocardial ischemia and/or infarction, which are usually due to  
44 coronary artery occlusion and acute ischemic necrosis of the myocardium due to  
45 progression of coronary atherosclerotic lesions<sup>[1, 2]</sup>. Emergency percutaneous coronary

1  
2  
3  
4 46 intervention (PCI) can quickly restore myocardial perfusion<sup>[3]</sup>. Although the  
5  
6  
7 47 development of technological and procedural PCI have resulted in substantial  
8  
9  
10 48 improvements in clinical outcomes, recurrent coronary events may still occur after  
11  
12 49 PCI<sup>[4]</sup>.

13  
14 50 The view of "residual cardiovascular risk" was introduced because MACE still occurs  
15  
16  
17 51 in some patients who received PCI during follow-up. PCI can treat focal  
18  
19  
20 52 manifestations of systemic progressive disease, but the residual risk of acute coronary  
21  
22 53 syndrome is largely related to the systemic proatherosclerotic effect of poorly  
23  
24  
25 54 controlled cardiovascular risk factors<sup>[5]</sup>. Lowering lipid levels, especially LDL-C, can  
26  
27 55 halt the progression of coronary atherosclerosis and improve cardiovascular outcomes.  
28  
29  
30 56 Based on this view, it is believed that long-term optimal lipid-lowering therapy is  
31  
32 57 effective in reducing long-term cardiovascular events after PCI. However, the view  
33  
34  
35 58 was still subject to challenges.

36  
37  
38 59  
39  
40 60 Based on data from the "Korea Acute Myocardial Infarction Registry", the proponents  
41  
42  
43 61 concluded that patients treated with statins had significantly lower rates of MACE,  
44  
45  
46 62 all-cause death, and cardiac death during the 2-year follow-up period after PCI  
47  
48  
49 63 application<sup>[6]</sup>. However, a study of postoperative follow-up of PCI patients enrolled in  
50  
51 64 the Melbourne Interventional Group registry concluded that statins have no significant  
52  
53  
54 65 benefit to MACEs after PCI<sup>[6]</sup>. The controversy may be based on two reasons: on the  
55  
56  
57 66 one hand, is that the optimal lipid reduction target may not be achieved by using  
58  
59 67 single statins<sup>[7, 8]</sup>. On the other hand, long-term high-dose application of statins  
60

1  
2  
3  
4 68 increases the risk of intracerebral hemorrhage and other side effects [9, 10].  
5  
6  
7 69  
8  
9 70 There is a consensus on preloading high-dose statins to reduce MACEs in the  
10  
11 71 perioperative period with PCI [11, 12]. However, there is still insufficient evidence for  
12  
13  
14 72 the continued application of lipid-lowering drugs to reduce the risk of long-term  
15  
16  
17 73 MACE and mortality. This study will assess the benefits of different lipid-lowering  
18  
19 74 regimens on the risk of MACEs and mortality in the post-PCI population by network  
20  
21  
22 75 meta-analysis.  
23  
24  
25  
26  
27  
28

## 27 **Methods**

29  
30 78 This study was performed in accordance with Preferred Reporting Items for  
31  
32 79 Systematic Reviews and Meta-Analyses (PRISMA) guidelines.  
33  
34

## 35 **Patient and Public Involvement**

36  
37 81 None  
38  
39  
40  
41  
42

## 43 **Search strategy**

44  
45 84 Public literature databases, including PubMed, Embase, and the Cochrane Library,  
46  
47  
48 85 were searched from inception to August 2022 without language restrictions using the  
49  
50  
51 86 following search terms: (lipid-lowering or statin or simvastatin or rosuvastatin or  
52  
53 87 atorvastatin or fluvastatin or lovastatin or pravastatin or pitavastatin or mevastatin or  
54  
55  
56 88 ezetimibe or “eicosapentaenoic acid” or “icosapent ethyl” or “bempedoic acid” or  
57  
58 89 fibrate or bezafibrate or gemfibrozil or fenofibrate or ciprofibrate or evolocumab or  
59  
60

1  
2  
3  
4 90 alirocumab or evinocumab or volanesorsen or vupanorsen or pelacarsen or olezarsen  
5  
6  
7 91 or inclisiran or olpasiran) and (“percutaneous coronary intervention” or “coronary  
8  
9 92 angioplasty”) and (random\* or randomized or randomized). The references of  
10  
11  
12 93 relevant systematic reviews and meta-analyses were also searched to avoid omissions.  
13  
14 94 The two authors conducted literature retrieval independently, and any conflicts were  
15  
16  
17 95 resolved through discussion with the third author.  
18  
19  
20 96

### 21 22 97 **Inclusion and exclusion criteria**

23  
24 98 The literature was included if it met the following criteria: 1, the study adopted a  
25  
26  
27 99 randomized controlled study design; 2, the study included patients who received PCI  
28  
29  
30 100 surgery or reported the subgroup of the population that received PCI; 3, the lipid-  
31  
32  
33 101 lowering regimen was applied to the population of the intervention group; 4, the  
34  
35 102 control group used a different lipid-lowering agent or regimen; and 5, the study  
36  
37  
38 103 reported the outcome of mortality and/or MACE. Exclusion criteria: 1, as preloading  
39  
40  
41 104 of statins before PCI had clear benefits, to determine whether application of lipid-  
42  
43  
44 105 lowering drugs after PCI also had beneficial effects. This work excluded the study on  
45  
46  
47 106 the preloading application of lipid-lowering drugs before PCI; 2, although high-dose  
48  
49  
50 107 lipid-lowering agents, such as statins, have a better lipid-lowering effect, long-term  
51  
52  
53 108 application may bring potential side effects [9, 13]. In this study, all agents were  
54  
55  
56 109 considered to be applied with reasonable doses, and dose–response studies were  
57  
58  
59 110 excluded. In addition, repeatedly published studies, protocols, conference abstracts,  
60  
111 111 reviews, comments and editorials were also excluded.



1  
2  
3  
4 112

5  
6 113 Data extraction and quality assessment

7  
8  
9 114 Two authors independently extracted the information from the included studies. The

10  
11 115 contents include the name of the first author, publication year, study location, sample

12  
13  
14 116 size (population received PCI), study abbreviation and registration number, lipid-

15  
16  
17 117 lowering intervention and control, and follow-up time.

18  
19  
20 118

21  
22 119 The outcomes analyzed were the incidence of all-cause mortality and MACE, whether

23  
24 120 reported as dichotomous or hazard ratio (HR) statistics based on Cox regression. The

25  
26  
27 121 MACE outcome was selected to most closely approximate the composite endpoint,

28  
29 122 including mortality, MI, stroke, coronary revascularization, and restenosis. Study

30  
31  
32 123 quality was assessed by two investigators using the Cochrane risk of bias assessment

33  
34  
35 124 tool, which included random sequence generation, allocation concealment, blinding of

36  
37  
38 125 participants and personnel, blinding of outcome assessment, incomplete outcome data,

39  
40  
41 126 selective reporting, and other potential biases.

42  
43  
44 127

45  
46 128 Statistical analysis

47  
48 129 For each direct paired comparison, we used the odds ratios and their 95% confidence

49  
50  
51 130 intervals (CIs) for dichotomous outcomes. The hazard ratios and their 95% CIs based

52  
53  
54 131 on Cox regression results were also pooled for reporting. We conducted frequentist

55  
56 132 network meta-analysis (NMA) using random effect models with restricted maximum

57  
58  
59 133 likelihood estimation to quantify network heterogeneity. The Q statistic was used to

1  
2  
3  
4 134 assess the sum of statistics for heterogeneity (within designs) and for overall  
5  
6 135 inconsistency (between designs)<sup>[14]</sup>. The ranking probabilities of each regimen were  
7  
8  
9 136 estimated using the surface under the cumulative ranking curve (SUCRA), and a  
10  
11 137 comparison-adjusted funnel plot was used to examine potential publication biases in  
12  
13  
14 138 NMA. P values of less than 0.05 were considered to be statistically significant. The  
15  
16  
17 139 NMA was performed using R language with the “netmeta” package.  
18  
19  
20 140

## 21 22 141 **Results**

23  
24 142 After removing duplications, we obtained 1588 literature items. After a screen of the  
25  
26  
27 143 titles and abstracts, 1515 irrelevant studies were excluded. Seventy-three articles were  
28  
29  
30 144 screened for full text. The following articles were excluded: dose–response studies (8),  
31  
32 145 no PCI population or subgroup was reported (6); no mortality or MACE-related  
33  
34  
35 146 outcomes were reported (6); repeated publication (5); study related to preloading of  
36  
37  
38 147 lipid-lowering agents (4); study not related to lipid-lowering agents (3); protocol (1);  
39  
40 148 non-RCT design (1). Finally, 39 articles were included containing 54478 patients after  
41  
42  
43 149 PCI<sup>[15-53]</sup> (Figure 1).  
44  
45  
46 150

47  
48 151 Among the included studies, the publication period ranged from 1991 to 2022. The  
49  
50  
51 152 research locations were mainly in Asia (China, Japan and South Korea), Europe  
52  
53  
54 153 (Netherlands, France, and Italy), America, and multiple centers. There were 10 studies  
55  
56 154 with sample sizes greater than 1000 patients. There were also 22 studies with publicly  
57  
58  
59 155 available clinical study registration numbers (Table 1). In terms of design quality, all  
60

156 included studies were RCTs. Therefore, the design quality is generally high. The main  
 157 factors potentially affecting design quality were the blinding of participants and  
 158 personnel and blinding of outcome assessment (Figure 2). However, as the desired  
 159 outcomes were mortality and MACE, the subjective factors of the investigator had  
 160 little influence on the outcomes.

161 **Table 1. The characteristics of included studies**

| Study                          | Location    | Sample size | Abbreviation  | Register ID         | Intervention                                                  | Control                | Follow-up# |
|--------------------------------|-------------|-------------|---------------|---------------------|---------------------------------------------------------------|------------------------|------------|
| Lorenz Råber 2022 [15]         | European    | 300         | PACMAN-AMI    | NCT03067844         | Alirocumab;rosuvastatin                                       | Placebo;rosuvastatin   | 52W        |
| Peterson, B. E. 2022 [16]      | Multicenter | 3408        | REDUCE-IT PCI | NCT01492361         | Icosapent ethyl;statins                                       | Placebo;statins        | 4.8Y       |
| Remo H.M. Furtado 2022 [17]    | Multicenter | 17073       | FOURIER       | NCT01764633         | Evolocumab;statins                                            | Placebo;statins        | 2.2Y       |
| Tomoaki Okada 2022 [18]        | Japan       | 102         | -             | UMIN000028729       | Evolocumab;pitavastatin                                       | Pitavastatin           | 4W         |
| Yan Hao 2022 [19]              | China       | 136         | -             | -                   | Evolocumab;atorvastatin;ezetimibe                             | Ezetimibe;atorvastatin | 3M         |
| Deng YF 2021 [20]              | China       | 90          | -             | -                   | Ezetimibe;atorvastatin                                        | Atorvastatin           | 1Y         |
| Sun C 2021 [21]                | China       | 171         | -             | ChiCTR-IPR-17012219 | Ezetimibe;rosuvastatin                                        | Rosuvastatin           | 3M         |
| Weifeng He 2020 [22]           | China       | 192         | -             | -                   | Atorvastatin vs. Rosuvastatin vs. Simvastatin                 | -                      | 6M         |
| Kiyoshi Hibi 2018 [23]         | Japan       | 128         | Ezetimibe-ACS | NCT00549926         | Ezetimibe;pitavastatin                                        | Pitavastatin           | 1Y         |
| Eui Im 2017 [24]               | Korea       | 2000        | -             | NCT01557075         | Atorvastatin                                                  | Pravastatin            | 1Y         |
| Hagiwara N 2017 [25]           | Japan       | 1734        | HIJ-PROPER    | UMIN000002742       | Ezetimibe;pitavastatin                                        | Pitavastatin           | 36M        |
| J Guo 2017 [26]                | China       | 137         | -             | -                   | Rosuvastatin                                                  | Control                | 1Y         |
| Wang YB 2017 [27]              | China       | 132         | -             | ChiCTR-IPR-15007035 | Pitavastatin                                                  | Atorvastatin           | 6M         |
| Watanabe T 2017 [28]           | Japan       | 193         | CHERRY        | UMIN000002815       | EPA;pitavastatin                                              | Pitavastatin           | 6-8M       |
| Zhi Liu 2017 [29]              | China       | 102         | -             | -                   | Ezetimibe;atorvastatin                                        | atorvastatin 20mg/d    | 1Y         |
| Kazumasa Nosaka 2016 [30]      | Japan       | 241         | -             | UMIN000016723       | EPA;pitavastatin                                              | Pitavastatin           | 1Y         |
| Kensuke Matsushita 2016 [31]   | Japan       | 118         | Yokohama-ACS  | NCT00549926         | Atorvastatin vs. Pitavastatin vs. Pravastatin vs. Fluvastatin | -                      | 10.3M      |
| Christopher P Cannon 2015 [32] | Multicenter | 12941       | IMPROVE-IT    | NCT00202878         | Ezetimibe;simvastatin                                         | Simvastatin            | 6M         |
| Kenichi Tsujita 2015 [33]      | Multicenter | 246         | PRECISE-IVUS  | NCT01043380         | Ezetimibe;atorvastatin                                        | Atorvastatin           | 1Y         |
| Stephen J. Nicholls 2015 [34]  | Multicenter | 3295        | VISTA-16      | NCT01130246         | Varespladib;atorvastatin                                      | Placebo;atorvastatin   | 6M         |

|                                 |             |      |                          |                |                     |              |       |
|---------------------------------|-------------|------|--------------------------|----------------|---------------------|--------------|-------|
| Zhang JR 2015 [35]              | China       | 104  | -                        | -              | Atorvastatin        | Rosuvastatin | 6M    |
| Mario Leoncin 2014 [36]         | Italy       | 333  | PRATO-ACS                | NCT01185938    | Rosuvastatin        | Control      | 6M    |
| Hiroyuki Takano 2013 [37]       | Japan       | 458  | PEARL                    | UMINC000000428 | Pitavastatin        | Control      | 35.5M |
| Tsuyoshi Nozue 2013 [38]        | Japan       | 164  | TRUTH                    | UMIN000004627  | Pitavastatin        | Pravastatin  | 2Y    |
| Jean-Marc Lablanche 2010 [39]   | Multicenter | 887  | CENTAURUS                | NCT00296387    | Rosuvastatin        | Atorvastatin | 3M    |
| C. Michael Gibson 2009 [40]     | US          | 2868 | PROVE IT-TIMI 22         | NCT00382460    | Atorvastatin        | Pravastatin  | 2Y    |
| Han Yaling 2009 [41]            | China       | 1275 | -                        | NCT00405717    | Atorvastatin        | Pravastatin  | 1Y    |
| Takafumi Hiro 2009 [42]         | Japan       | 307  | JAPAN-ACS                | NCT00242944    | Pitavastatin        | Atorvastatin | 1Y    |
| Tomotaka Dohi 2009 [43]         | Japan       | 180  | Extended-ESTABLISH trial | -              | Atorvastatin        | Control      | 4Y    |
| Toru Toi 2009 [44]              | Japan       | 160  | -                        | -              | Pitavastatin        | Atorvastatin | 17D   |
| Xu Kai 2007 [45]                | China       | 648  | -                        | -              | Atorvastatin        | Control      | 2Y    |
| Bae JH 2004 [46]                | Korea       | 205  | -                        | -              | Atorvastatin        | Control      | 6M    |
| Patrick W J C Serruys 2002 [47] | Multicenter | 1677 | LIPS                     | -              | Fluvastatin         | Placebo      | 3.9Y  |
| Han J.G.H. Mulder 2000 [48]     | Netherlands | 201  | REGRESS                  | -              | Pravastatin         | Placebo      | 2Y    |
| Greg C. Flaker 1999 [49]        | Multicenter | 1154 | CARE trial               | -              | Pravastatin         | Placebo      | 6Y    |
| MICHEL E. BERTRAND 1997 [50]    | France      | 695  | PREDICT                  | -              | Pravastatin         | Placebo      | 6M    |
| J H O'Keefe Jr 1996 [51]        | US          | 200  | APPLE                    | -              | Probucol;lovastatin | Placebo      | 6M    |
| Haruhiko Onaka 1994 [52]        | Japan       | 66   | -                        | -              | Pravastatin         | Control      | 5M    |
| Rakesh Sahni 1991 [53]          | US          | 157  | -                        | -              | Lovastatin          | Control      | 6M    |

162

163 Abbreviations: EPA: eicosapentaenoic acid.

164 #: Follow-up period: Y: years; M: months; W: weeks; D: days

165 As two studies did not specify the types of statins, the network meta-analysis will be

166 divided into two parts. One part was analyzed based on specific types of statins, and

167 the other was based on taking statins as a whole. For the dichotomous results of

168 MACE, the NMA based on specific types of statins included 18 lipid-lowering

169 regimens. The Q test for heterogeneity was  $p = 0.07$ , and for inconsistency, it was  $p =$

1  
2  
3  
4 170 0.16, indicating no evidence for heterogeneity and inconsistency in the NMA.  
5  
6  
7 171 In pairwise comparisons with the control, alirocumab plus rosuvastatin (OR: 0.18; 95%  
8  
9 172 CI: 0.07-0.44; SUCRA: 0.94), evolocumab plus atorvastatin and ezetimibe (OR: 0.18;  
10  
11 173 95% CI: 0.05-0.63; SUCRA: 0.90), ezetimibe plus rosuvastatin (OR: 0.29; 95% CI:  
12  
13 174 0.11-0.76; SUCRA: 0.80) have significant advantages and relatively high SUCRA  
14  
15 175 rankings. No potential publication bias was found according to the comparison-  
16  
17 176 adjusted funnel plot (Figure 3).  
18  
19  
20  
21  
22  
23  
24

25 178 In the NMA based on taking statins as a whole, ten regimens were analyzed.  
26  
27 179 Evolocumab plus ezetimibe and statins (OR: 0.19; 95% CI: 0.06-0.59; SUCRA: 0.92),  
28  
29 180 alirocumab plus statins (OR: 0.27; 95% CI: 0.13-0.59; SUCRA: 0.87), and coscapent  
30  
31 181 ethyl plus statins (OR: 0.39; 95% CI: 0.25-0.62; SUCRA: 0.72) have significant  
32  
33 182 advantages and relatively high SUCRA rankings. No potential publication bias was  
34  
35 183 found.  
36  
37  
38  
39  
40  
41  
42

43 185 For the HR results of MACEs, the NMA based on specific types of statins included  
44  
45 186 nine regimens. The Q test for heterogeneity was  $p = 0.964$  and because the network  
46  
47 187 comparisons lack loops. Therefore, the results were considered consistent. Compared  
48  
49 188 to the control, eicosapentaenoic acid (EPA) plus pitavastatin (HR: 0.67; 95% CI:  
50  
51 189 0.49-0.96; SUCRA: 0.91), atorvastatin (HR: 0.76; 95% CI: 0.63-0.90; SUCRA: 0.83),  
52  
53 190 and varespladib plus atorvastatin (HR: 0.77; 95% CI: 0.61-0.97; SUCRA: 0.77) have  
54  
55 191 significant advantages and relatively high SUCRA rankings. Potential publication bias  
56  
57  
58  
59  
60

1  
2  
3  
4 192 was not analyzed due to a smaller number of included studies.  
5  
6

7 193  
8

9 194 In the NMA based on taking statins as a whole, seven regimens were analyzed. EPA  
10  
11 195 plus statins (HR: 0.60; 95% CI: 0.42-0.85; SUCRA: 0.96) and icosapent ethyl plus  
12  
13 196 statins (HR: 0.73; 95% CI: 0.62-0.86; SUCRA: 0.81) had significant advantages over  
14  
15  
16  
17 197 the control.  
18

19 198  
20

21  
22 199 For the dichotomous results of mortality, the NMA based on specific types of statins  
23  
24 200 included 17 lipid-lowering regimens. The Q test for heterogeneity was  $p = 0.78$ , and  
25  
26 201 for inconsistency, it was  $p = 0.99$ . Due to the rare occurrence of events, the results of  
27  
28  
29 202 the comparison were low precision with a large standard error. Compared to the  
30  
31 203 control, only rosuvastatin (OR: 0.30; 95% CI: 0.11-0.84; SUCRA: 0.79) showed a  
32  
33 204 significantly better effect. Ezetimibe plus rosuvastatin had a relatively high SUCRA  
34  
35 205 ranking, but there was no significant difference compared to the control (OR: 0.14; 95%  
36  
37 206 CI: 0.02-1.26; SUCRA: 0.86). No potential publication bias was found (Figure 4).  
38  
39  
40  
41  
42

43 207  
44

45 208 In the NMA based on taking statins as a whole, nine regimens were analyzed.  
46  
47 209 Ezetimibe plus statins (OR: 0.55; 95% CI: 0.43-0.89; SUCRA: 0.75) and icosapent  
48  
49 210 ethyl plus statins (OR: 0.66; 95% CI: 0.45-0.96; SUCRA: 0.63) had significant  
50  
51 211 advantages compared with the blank control group. No potential publication bias  
52  
53 212 existed. NMA analysis was not performed due to the small number of studies  
54  
55  
56 213 reporting HR for mortality (Figure 5).  
57  
58  
59  
60

1  
2  
3  
4 2145  
6 215 **Discussion**

7  
8  
9 216 This study analyzed the benefits of lipid-lowering therapy on mortality and MACE  
10  
11 217 outcomes in patients who received PCI by network meta-analysis. The results showed  
12  
13  
14 218 that several lipid-lowering regimens could reduce the risk of MACEs compared with  
15  
16  
17 219 the blank control. Icosapent ethyl plus statins had the benefit of reducing both the risk  
18  
19 220 of MACEs and mortality. However, EPA plus statins had more advantages in  
20  
21  
22 221 reducing the risk of MACEs. Of note, based on the current evidence, alirocumab and  
23  
24  
25 222 evolocumab plus statins had obvious advantages in reducing the risk of MACEs but  
26  
27 223 had no obvious benefit in reducing the risk of mortality.

28  
29  
30 224

31  
32 225 EPA is a long-chain omega-3 polyunsaturated fatty acid. Long-term intake of EPA  
33  
34  
35 226 can reduce the residual cardiovascular risk to reduce the risk of MACEs<sup>[54]</sup>. In terms  
36  
37  
38 227 of pathological mechanisms, EPA combined with pitavastatin can reduce the lipid  
39  
40  
41 228 volume of coronary artery plaque and total atherosclerotic plaque volume in patients  
42  
43 229 who receive PCI, which may be the reason for the reduced risk of MACEs <sup>[55]</sup>.

44  
45  
46 230

47  
48 231 Icosapent ethyl is a highly purified and stable eicosapentaenoic acid ethyl ester that  
49  
50  
51 232 has potential higher anti-inflammatory, antioxidant, plaque stability and cell  
52  
53 233 membrane stability effects <sup>[56]</sup>. In the NMA results, icosapent ethyl plus statins had  
54  
55  
56 234 significant benefits for either mortality or MACEs in patients who received PCI,  
57  
58  
59 235 which was an ideal regimen for the population.

1  
2  
3  
4 236

5  
6 237 Ezetimibe inhibits the absorption of cholesterol and has a synergistic lipid-lowering  
7  
8  
9 238 pharmacological effect with statins to further reduce the risk of death and MACE. In  
10  
11 239 particular, when combined with rosuvastatin, it has a stronger lipid-lowering effect  
12  
13  
14 240 with a high safety profile without the risk of drug interactions<sup>[57]</sup>. Our NMA results  
15  
16  
17 241 also showed that it can reduce the risk of MACE and mortality. According to the  
18  
19 242 guidelines for the management of dyslipidemia from the European Society of  
20  
21  
22 243 Cardiology and the European Atherosclerosis Society, ezetimibe was recommended if  
23  
24 244 the LDL-C level was not reached<sup>[58, 59]</sup>. The American College of Cardiology  
25  
26  
27 245 guidelines also recommend adding ezetimibe when using maximally tolerated statin  
28  
29  
30 246 therapy and if LDL-C levels remain  $\geq 70$  mg/dL<sup>[60]</sup>. These benefits have also been  
31  
32  
33 247 demonstrated in the secondary prevention of PCI.

34  
35 248

36  
37  
38 249 Alirocumab and evolumab are both proprotein convertase subtilisin/kexin type 9  
39  
40 250 inhibitors (PCSK9i), which can increase the level of LDL receptor in the liver, thus  
41  
42  
43 251 improving the ability of the liver to bind LDL-C and reducing the level of peripheral  
44  
45 252 LDL-C<sup>[61]</sup>. There was also a synergistic lipid-lowering pharmacological effect when  
46  
47  
48 253 PCSK9i was combined with statins that significantly reduced LDL-C and  
49  
50  
51 254 atherosclerosis event risk; however, there was still controversy regarding the mortality  
52  
53 255 risk reduction<sup>[62]</sup>. It has been suggested that the powerful effect of PCSK9I on  
54  
55  
56 256 reducing LDL-C predisposes patients to hypocholesterolemia, which will increase the  
57  
58  
59 257 risk of cerebral hemorrhage<sup>[63, 64]</sup>. On the other hand, PCSK9i could not reduce serum  
60



1  
2  
3  
4 258 inflammatory factors, suggesting that it may not reduce the risk of residual  
5  
6 259 inflammation in the post-PCI population [65].  
7  
8  
9 260  
10  
11 261 In the results of this study, lipid-lowering therapy strategies had general advantages in  
12  
13  
14 262 reducing MACE risk. However, for all-cause mortality, the advantage of lipid-  
15  
16  
17 263 lowering therapy was not obvious. Based on dichotomous outcomes of mortality,  
18  
19  
20 264 some strategies may even have a tendency to increase the mortality risk. This  
21  
22 265 challenges the opinion that lipid-lowering therapy is recommended after PCI [66]. A  
23  
24  
25 266 large sample size retrospective study suggests that statins can reduce the risk of all-  
26  
27 267 cause death in patients with coronary artery disease undergoing PCI, regardless of  
28  
29  
30 268 personal cholesterol levels [67]. Alternatively, the “Lipid Paradox” view has been  
31  
32  
33 269 proposed and indicated that higher levels of LDL-C and triglycerides on admission  
34  
35  
36 270 are associated with better clinical outcomes. Especially in patients with ST-elevation  
37  
38 271 myocardial infarction, lower LDL-C levels were associated with worse mortality  
39  
40 272 outcomes [68]. However, this view is also controversial [69].  
41  
42  
43 273  
44  
45 274 On the other hand, it is possible that the contribution of LDL-C reduction to the risk  
46  
47  
48 275 of mortality outcomes is obscured by the other confounding factors. For example,  
49  
50  
51 276 inflammatory status may also have an important impact on patient mortality risk. In a  
52  
53  
54 277 cohort of post-PCI patients with low LDL-C levels, residual inflammatory risk also  
55  
56 278 had a significant effect on overall mortality [70]. C-reactive protein can also predict  
57  
58  
59 279 long-term mortality in post-PCI patients independent of LDL-C levels [71]. In addition,  
60

1  
2  
3  
4 280 cardiac remodeling also has an important impact on the survival outcome of people  
5  
6 281 after PCI [72].  
7  
8

9 282

10  
11 283 In conclusion, the results of this study suggest that EPA, especially icosapent ethyl,  
12  
13  
14 284 plus statins had a beneficial effect on reducing the risk of MACEs and mortality in  
15  
16  
17 285 post-PCI patients. PCSK9i plus statins was able to reduce the risk of MACEs, but the  
18  
19  
20 286 risk of mortality remained unclear.  
21

22 287

23  
24 288 There are still several limitations in this study. First, this study was based on the study  
25  
26  
27 289 level instead of the individual level, making it difficult to consider the individual  
28  
29  
30 290 confounding factors in the analysis. Second, two included studies did not specify the  
31  
32  
33 291 type of statins, so our study had to be analyzed separately according to whether all  
34  
35  
36 292 statins were considered as a whole. Third, the criteria for defining MACEs varied  
37  
38  
39 293 among studies that contributed to heterogeneity among the study results. Fourth,  
40  
41  
42 294 many included studies reported only dichotomous outcomes but did not report the HR  
43  
44  
45 295 results, resulting in the incompleteness of the relevant analysis results.  
46

47 296

#### 48 297 **Acknowledgements**

49 298 We thank Professor Xiang Xie for his support.

50 299

#### 51 300 **Author contributions**

52 301 Chang-Jiang Deng completed the manuscript, Ju Yan, Ting-Ting Wu and Ying Pan  
53  
54  
55 302 guided the data analysis and the production of the figures, All the authors read and  
56  
57  
58 303 approved the final manuscript.  
59  
60

1  
2  
3 304

4  
5 305 **Funding**

6  
7 306 No funding

8 307

9  
10 308 **Availability of data and materials**

11 309 the datasets used or analysed during the current study are available from the  
12  
13 310 corresponding author on reasonable request.

14  
15 311

16  
17 312 **Declarations**

18 313

19  
20 314 **Ethics approval and consent to participate**

21  
22 315 This study does not involve human participants and ethical approval was not required.

23  
24 316

25  
26 317 **Consent for publication**

27 318 not applicable.

28  
29 319

30  
31 320 **Competing interests**

32  
33 321 The authors declare that they have no competing interests.

34  
35 322 **References**

36  
37  
38 323 1.Yoshihara S (2022) Acute coronary syndrome on non-electrocardiogram-gated  
39  
40 324 contrast-enhanced computed tomography. World J Radiol14(2):30-46.

41  
42  
43 325 2.Ferri N, Ruscica M, Lupo MG, Vicenzi M, Sirtori CR, Corsini A (2022)

44  
45  
46 326 Pharmacological rationale for the very early treatment of acute coronary syndrome  
47  
48 327 with monoclonal antibodies anti-PCSK9. Pharmacol Res 184:106439.

49  
50  
51 328 3.Feng KF, Wu M, Ma LK (2021) Factors Associated with the Prognosis of Patients  
52  
53 329 with Acute Myocardial Infarction and Cardiogenic Shock. Med Sci Monit  
54  
55  
56 330 27:e929996.

57  
58  
59 331 4.Koskinas KC, Mach F, Raber L (2021) Lipid-lowering therapy and percutaneous  
60

- 1  
2  
3  
4 332 coronary interventions. *EuroIntervention* 16(17):1389-403.  
5  
6  
7 333 5.Kim YH, Her AY, Jeong MH, Kim BK, Shin DH, Kim JS, Ko YG, Choi D, Hong  
8  
9 334 MK, Jang Y (2019) Two-year outcomes of statin therapy in patients with acute  
10  
11 335 myocardial infarction with or without dyslipidemia after percutaneous coronary  
12  
13 336 intervention in the era of new-generation drug-eluting stents within Korean  
14  
15 337 population: Data from the Korea Acute Myocardial Infarction Registry. *Catheter*  
16  
17 338 *Cardiovasc Interv* 93(7):1264-75.  
18  
19  
20 339 6.Chin KL, Wolfe R, Reid CM, Tonkin A, Hopper I, Brennan A, Andrianopoulos N,  
21  
22 340 Duffy SJ, Clark D, Ajani A, Liew D, Melbourne Interventional G (2018) Does Statin  
23  
24 341 Benefits Patients with Heart Failure Undergoing Percutaneous Coronary Intervention?  
25  
26 342 Findings from the Melbourne Interventional Group Registry. *Cardiovasc Drugs Ther*  
27  
28 343 32(1):57-64.  
29  
30  
31 344 7.Ray KK, Molemans B, Schoonen WM, Giovas P, Bray S, Kiru G, Murphy J,  
32  
33 345 Banach M, De Servi S, Gaita D, Gouni-Berthold I, Hovingh GK, Jozwiak JJ, Jukema  
34  
35 346 JW, Kiss RG, Kownator S, Iversen HK, Maher V, Masana L, Parkhomenko A,  
36  
37 347 Peeters A, Clifford P, Raslova K, Siostrzonek P, Romeo S, Tousoulis D,  
38  
39 348 Vlachopoulos C, Vrablik M, Catapano AL, Poulter NR (2021) study DVEU-Wide  
40  
41 349 Cross-Sectional Observational Study of Lipid-Modifying Therapy Use in Secondary  
42  
43 350 and Primary Care: the DA VINCI study. *Eur J Prev Cardiol* 28(11):1279-89.  
44  
45  
46 351 8.Rea F, Savare L, Corrao G, Mancia G (2021) Adherence to Lipid-Lowering  
47  
48 352 Treatment by Single-Pill Combination of Statin and Ezetimibe. *Adv Ther*  
49  
50 353 38(10):5270-85.  
51  
52  
53  
54  
55  
56  
57  
58  
59  
60

- 1  
2  
3  
4 354 9.Pandit AK, Kumar P, Kumar A, Chakravarty K, Misra S, Prasad K (2016) High-  
5  
6 355 dose statin therapy and risk of intracerebral hemorrhage: a meta-analysis. *Acta Neurol*  
7  
8  
9 356 *Scand* 134(1):22-8.  
10  
11 357 10. Bellosta S, Corsini A (2018) Statin drug interactions and related adverse  
12  
13  
14 358 reactions: an update. *Expert Opin Drug Saf* 17(1):25-37.  
15  
16  
17 359 11. Yang X, Lan X, Zhang XL, Han ZL, Yan SM, Wang WX, Xu B, Ge WH (2022)  
18  
19 360 Intensive vs non-intensive statin pretreatment before percutaneous coronary  
20  
21  
22 361 intervention in Chinese patients: A meta-analysis of randomized controlled trials.  
23  
24 362 *World J Clin Cases* 10(5):1557-71.  
25  
26  
27 363 12. Borovac JA, Leth-Olsen M, Kumric M, D'Amario D, Schwarz K, Glavas D, Bozic  
28  
29 364 *J* (2022) Efficacy of high-dose atorvastatin or rosuvastatin loading in patients with  
30  
31 365 acute coronary syndrome undergoing percutaneous coronary intervention: a meta-  
32  
33 366 analysis of randomized controlled trials with GRADE qualification of available  
34  
35 367 evidence. *Eur J Clin Pharmacol* 78(1):111-26.  
36  
37  
38 368 13. Vinci P, Panizon E, Tosoni LM, Cerrato C, Pellicori F, Mearelli F, Biasinutto C,  
39  
40 369 Fiotti N, Di Girolamo FG, Biolo G (2021) Statin-Associated Myopathy: Emphasis on  
41  
42 370 Mechanisms and Targeted Therapy. *Int J Mol Sci* 22(21).  
43  
44  
45 371 14. Luo Y, Chaimani A, Furukawa TA, Kataoka Y, Ogawa Y, Cipriani A, Salanti G  
46  
47 372 (2021) Visualizing the evolution of evidence: Cumulative network meta-analyses of  
48  
49 373 new generation antidepressants in the last 40 years. *Res Synth Methods* 12(1):74-85.  
50  
51  
52 374 15. Raber L, Ueki Y, Otsuka T, Losdat S, Haner JD, Lonborg J, Fahrni G, Iglesias JF,  
53  
54 375 van Geuns RJ, Ondracek AS, Radu Juul Jensen MD, Zanchin C, Stortecky S, Spirk D,  
55  
56  
57  
58  
59  
60

- 1  
2  
3  
4 376 Siontis GCM, Saleh L, Matter CM, Daemen J, Mach F, Heg D, Windecker S,  
5  
6 377 Engstrom T, Lang IM, Koskinas KC, collaborators P-A (2022) Effect of Alirocumab  
7  
8  
9 378 Added to High-Intensity Statin Therapy on Coronary Atherosclerosis in Patients With  
10  
11 379 Acute Myocardial Infarction: The PACMAN-AMI Randomized Clinical Trial. JAMA  
12  
13  
14 380 327(18):1771-81.  
15  
16  
17 381 16.Peterson BE, Bhatt DL, Steg PG, Miller M, Brinton EA, Jacobson TA, Ketchum  
18  
19 382 SB, Juliano RA, Jiao L, Doyle RT, Jr., Granowitz C, Gibson CM, Pinto D, Giugliano  
20  
21  
22 383 RP, Budoff MJ, Tardif JC, Verma S, Ballantyne CM, Investigators R-I (2022)  
23  
24 384 Treatment With Icosapent Ethyl to Reduce Ischemic Events in Patients With Prior  
25  
26 385 Percutaneous Coronary Intervention: Insights From REDUCE-IT PCI. J Am Heart  
27  
28 386 Assoc 11(6):e022937.  
29  
30  
31 387 17.Furtado RHM, Fagundes AA, Jr., Oyama K, Zelniker TA, Tang M, Kuder JF,  
32  
33 388 Murphy SA, Hamer A, Wang H, Keech AC, Giugliano RP, Sabatine MS, Bergmark  
34  
35 389 BA (2022) Effect of Evolocumab in Patients With Prior Percutaneous Coronary  
36  
37 390 Intervention. Circ Cardiovasc Interv 15(3):e011382.  
38  
39  
40 391 18.Okada T, Miyoshi T, Doi M, Nosaka K, Tsushima R, Ugawa S, Takagi W, Sogo  
41  
42 392 M, Takahashi M, Ito H (2022) Effect of Early Initiation of Evolocumab on  
43  
44 393 Lipoprotein(a) in Patients with Acute Myocardial Infarction: Sub-Analysis of a  
45  
46 394 Randomized Controlled Trial. J Cardiovasc Dev Dis 9(5).  
47  
48  
49 395 19.Hao Y, Yang YL, Wang YC, Li J (2022) Effect of the Early Application of  
50  
51 396 Evolocumab on Blood Lipid Profile and Cardiovascular Prognosis in Patients with  
52  
53 397 Extremely High-Risk Acute Coronary Syndrome. Int Heart J 63(4):669-77.  
54  
55  
56  
57  
58  
59  
60

- 1  
2  
3  
4 398 20.Deng Y, He S, Wang D, Dai C, Xu X, Zhang J (2021) Clinical study of effect of  
5  
6 399 ezetimibe combined with statins on residual lipoprotein cholesterol and MACE events  
7  
8  
9 400 in patients undergoing emergency intervention with acute coronary syndrome.  
10  
11 401 Chinese Journal of Clinical Pharmacology and Therapeutics 26(9):1048-52.  
12  
13  
14 402 21.Sun C, Zheng W, Liang L, Liu Z, Sun W, Tang R (2021) Ezetimibe Improves  
15  
16 403 Rosuvastatin Effects on Inflammation and Vascular Endothelial Function in Acute  
17  
18 404 Coronary Syndrome Patients Undergoing PCI. J Interv Cardiol 2021:2995602.  
19  
20  
21  
22 405 22.He W, Cao M, Li Z (2020) Effects of different doses of atorvastatin, rosuvastatin,  
23  
24 406 and simvastatin on elderly patients with ST-elevation acute myocardial infarction  
25  
26 407 (AMI) after percutaneous coronary intervention (PCI). Drug Dev Res.  
27  
28  
29 408 2020;81(5):551-6.  
30  
31  
32 409 23.Hibi K, Sonoda S, Kawasaki M, Otsuji Y, Murohara T, Ishii H, Sato K, Koshida  
33  
34 410 R, Ozaki Y, Sata M, Morino Y, Miyamoto T, Amano T, Morita S, Kozuma K,  
35  
36 411 Kimura K, Fujiwara H, Ezetimibe ACSI (2018) Effects of Ezetimibe-Statins  
37  
38 412 Combination Therapy on Coronary Atherosclerosis in Acute Coronary Syndrome.  
39  
40  
41 413 Circ J 82(3):757-66.  
42  
43  
44 414 24.Im E, Cho YH, Suh Y, Cho DK, Her AY, Kim YH, Lee K, Kang WC, Yun KH,  
45  
46 415 Yoo SY, Cheong SS, Shin DH, Ahn CM, Kim JS, Kim BK, Ko YG, Choi D, Jang Y,  
47  
48 416 Hong MK (2018) High-intensity Statin Treatments in Clinically Stable Patients on  
49  
50 417 Aspirin Monotherapy 12 Months After Drug-eluting Stent Implantation: A  
51  
52 418 Randomized Study. Rev Esp Cardiol (Engl Ed) 71(6):423-31.  
53  
54  
55 419 25.Hagiwara N, Kawada-Watanabe E, Koyanagi R, Arashi H, Yamaguchi J, Nakao K,  
56  
57  
58  
59  
60

- 1  
2  
3  
4 420 Tobaru T, Tanaka H, Oka T, Endoh Y, Saito K, Uchida T, Matsui K, Ogawa H (2017)  
5  
6 421 Low-density lipoprotein cholesterol targeting with pitavastatin + ezetimibe for  
7  
8  
9 422 patients with acute coronary syndrome and dyslipidaemia: the HIJ-PROPER study, a  
10  
11 423 prospective, open-label, randomized trial. *Eur Heart J*. 2017;38(29):2264-76.  
12  
13 424 26. Guo J, Zhang WZ, Zhao Q, Wo JS, Cai SL (2017) Study on the effect of different  
14  
15 425 doses of rosuvastatin on ventricular remodeling in patients with acute coronary  
16  
17 426 syndrome after emergency percutaneous coronary intervention. *Eur Rev Med*  
18  
19 427 *Pharmacol Sci* 21(19):4457-63.  
20  
21 428 27. Wang YB, Fu XH, Gu XS, Fan WZ, Jiang YF, Hao GZ, Miao Q, Cao J, Fu B, Li  
22  
23 429 Y (2017) Effects of intensive pitavastatin therapy on glucose control in patients with  
24  
25 430 non-ST elevation acute coronary syndrome. *Am J Cardiovasc Dis* 7(4):89-96.  
26  
27 431 28. Watanabe T, Ando K, Daidoji H, Otaki Y, Sugawara S, Matsui M, Ikeno E, Hirono  
28  
29 432 O, Miyawaki H, Yashiro Y, Nishiyama S, Arimoto T, Takahashi H, Shishido T,  
30  
31 433 Miyashita T, Miyamoto T, Kubota I, investigators Cs (2017) A randomized controlled  
32  
33 434 trial of eicosapentaenoic acid in patients with coronary heart disease on statins. *J*  
34  
35 435 *Cardiol* 70(6):537-44.  
36  
37 436 29. Liu Z, Hao H, Yin C, Chu Y, Li J, Xu D (2017) Therapeutic effects of atorvastatin  
38  
39 437 and ezetimibe compared with double-dose atorvastatin in very elderly patients with  
40  
41 438 acute coronary syndrome. *Oncotarget* 8(25):41582-9.  
42  
43 439 30. Nosaka K, Miyoshi T, Iwamoto M, Kajiya M, Okawa K, Tsukuda S, Yokohama F,  
44  
45 440 Sogo M, Nishibe T, Matsuo N, Hirohata S, Ito H, Doi M (2017) Early initiation of  
46  
47 441 eicosapentaenoic acid and statin treatment is associated with better clinical outcomes  
48  
49  
50  
51  
52  
53  
54  
55  
56  
57  
58  
59  
60



- 1  
2  
3  
4 442 than statin alone in patients with acute coronary syndromes: 1-year outcomes of a  
5  
6 443 randomized controlled study. *Int J Cardiol* 228:173-9.  
7  
8  
9 444 31.Matsushita K, Hibi K, Komura N, Akiyama E, Maejima N, Iwahashi N, Tsukahara  
10  
11 445 K, Kosuge M, Ebina T, Sumita S, Umemura S, Kimura K (2016) Effects of 4 Statins  
12  
13 446 on Regression of Coronary Plaque in Acute Coronary Syndrome. *Circ J* 80(7):1634-  
14  
15  
16 447 43.  
17  
18  
19 448 32.Cannon CP, Blazing MA, Giugliano RP, McCagg A, White JA, Theroux P, Darius  
20  
21  
22 449 H, Lewis BS, Ophuis TO, Jukema JW, De Ferrari GM, Ruzyllo W, De Lucca P, Im K,  
23  
24  
25 450 Bohula EA, Reist C, Wiviott SD, Tershakovec AM, Musliner TA, Braunwald E,  
26  
27 451 Califf RM, Investigators I-I (2015) Ezetimibe Added to Statin Therapy after Acute  
28  
29 452 Coronary Syndromes. *N Engl J Med* 372(25):2387-97.  
30  
31  
32 453 33.Tsujita K, Sugiyama S, Sumida H, Shimomura H, Yamashita T, Yamanaga K,  
33  
34  
35 454 Komura N, Sakamoto K, Oka H, Nakao K, Nakamura S, Ishihara M, Matsui K,  
36  
37  
38 455 Sakaino N, Nakamura N, Yamamoto N, Koide S, Matsumura T, Fujimoto K, Tsunoda  
39  
40  
41 456 R, Morikami Y, Matsuyama K, Oshima S, Kaikita K, Hokimoto S, Ogawa H,  
42  
43 457 Investigators P-I (2015) Impact of Dual Lipid-Lowering Strategy With Ezetimibe and  
44  
45 458 Atorvastatin on Coronary Plaque Regression in Patients With Percutaneous Coronary  
46  
47  
48 459 Intervention: The Multicenter Randomized Controlled PRECISE-IVUS Trial. *J Am*  
49  
50  
51 460 *Coll Cardiol* 66(5):495-507.  
52  
53  
54 461 34.Nicholls SJ, Kastelein JJ, Schwartz GG, Bash D, Rosenson RS, Cavender MA,  
55  
56 462 Brennan DM, Koenig W, Jukema JW, Nambi V, Wright RS, Menon V, Lincoff AM,  
57  
58 463 Nissen SE, Investigators V- (2014) Varespladib and cardiovascular events in patients  
59  
60

- 1  
2  
3  
4 464 with an acute coronary syndrome: the VISTA-16 randomized clinical trial. JAMA  
5  
6 465 311(3):252-62.  
7  
8  
9 466 35.Zhang JR, Wang DQ, Du J, Qu GS, Du JL, Deng SB, Liu YJ, Cai JX, She Q  
10  
11 467 (2015) Efficacy of Clopidogrel and Clinical Outcome When Clopidogrel Is  
12  
13 468 Coadministered With Atorvastatin and Lansoprazole: A Prospective, Randomized,  
14  
15 469 Controlled Trial. *Medicine (Baltimore)* 94(50):e2262.  
16  
17 470 36.Leoncini M, Toso A, Maioli M, Tropeano F, Badia T, Villani S, Bellandi F (2014)  
18  
19 471 Early high-dose rosuvastatin and cardioprotection in the protective effect of  
20  
21 472 rosuvastatin and antiplatelet therapy on contrast-induced acute kidney injury and  
22  
23 473 myocardial damage in patients with acute coronary syndrome (PRATO-ACS) study.  
24  
25 474 *Am Heart J* 168(5):792-7.  
26  
27 475 37.Takano H, Mizuma H, Kuwabara Y, Sato Y, Shindo S, Kotooka N, Fujimatsu D,  
28  
29 476 Kobayashi Y, Inoue T, Node K, Komuro I, Investigators PS (2013) Effects of  
30  
31 477 pitavastatin in Japanese patients with chronic heart failure: the Pitavastatin Heart  
32  
33 478 Failure Study (PEARL Study). *Circ J* 77(4):917-25.  
34  
35 479 38. Nozue T, Fukui K, Yamamoto S, Kunishima T, Umezawa S, Onishi Y, Tohyama  
36  
37 480 S, Takeyama Y, Morino Y, Yamauchi T, Hibi K, Sozu T, Terashima M, Michishita I,  
38  
39 481 Investigators T (2013) C-reactive protein and future cardiovascular events in statin-  
40  
41 482 treated patients with angina pectoris: the extended TRUTH study. *J Atheroscler*  
42  
43 483 *Thromb* 20(9):717-25.  
44  
45 484 39.Lablanche JM, Leone A, Merkely B, Morais J, Alonso J, Santini M, Eha J, Demil  
46  
47 485 N, Licour M, Tardif JC, investigators C (2010) Comparison of the efficacy of

- 1  
2  
3  
4 486 rosuvastatin versus atorvastatin in reducing apolipoprotein B/apolipoprotein A-1 ratio  
5  
6  
7 487 in patients with acute coronary syndrome: results of the CENTAURUS study. Arch  
8  
9 488 Cardiovasc Dis 103(3):160-9.  
10  
11 489 40.Gibson CM, Pride YB, Hochberg CP, Sloan S, Sabatine MS, Cannon CP, Group  
12  
13  
14 490 TS (2009) Effect of intensive statin therapy on clinical outcomes among patients  
15  
16  
17 491 undergoing percutaneous coronary intervention for acute coronary syndrome. PCI-  
18  
19 492 PROVE IT: A PROVE IT-TIMI 22 (Pravastatin or Atorvastatin Evaluation and  
20  
21  
22 493 Infection Therapy-Thrombolysis In Myocardial Infarction 22) Substudy. J Am Coll  
23  
24 494 Cardiol 54(24):2290-5.  
25  
26  
27 495 41.Han YL, Zhang ZL, Li Y, Wang SL, Jing QM, Wang ZL, Wang DM (2009)  
28  
29  
30 496 Comparison on long-term effects of atorvastatin or pravastatin combined with  
31  
32  
33 497 clopidogrel for patients undergoing coronary stenting: a randomized controlled trial.  
34  
35 498 Zhonghua Yi Xue Za Zhi 89(32):2240-4.  
36  
37  
38 499 42.Hiro T, Kimura T, Morimoto T, Miyauchi K, Nakagawa Y, Yamagishi M, Ozaki  
39  
40 500 Y, Kimura K, Saito S, Yamaguchi T, Daida H, Matsuzaki M, Investigators J-A (2009)  
41  
42  
43 501 Effect of intensive statin therapy on regression of coronary atherosclerosis in patients  
44  
45 502 with acute coronary syndrome: a multicenter randomized trial evaluated by  
46  
47  
48 503 volumetric intravascular ultrasound using pitavastatin versus atorvastatin (JAPAN-  
49  
50 504 ACS [Japan assessment of pitavastatin and atorvastatin in acute coronary syndrome]  
51  
52 505 study). J Am Coll Cardiol 54(4):293-302.  
53  
54  
55 506 43.Dohi T, Miyauchi K, Okazaki S, Yokoyama T, Yanagisawa N, Tamura H, Kojima  
56  
57  
58 507 T, Yokoyama K, Kurata T, Daida H (2009) Early intensive statin treatment for six  
59  
60

1  
2  
3  
4 508 months improves long-term clinical outcomes in patients with acute coronary  
5  
6 509 syndrome (Extended-ESTABLISH trial): a follow-up study. *Atherosclerosis*  
7  
8  
9 510 210(2):497-502.  
10  
11 511 44.Toi T, Taguchi I, Yoneda S, Kageyama M, Kikuchi A, Tokura M, Kanaya T, Abe  
12  
13  
14 512 S, Matsuda R, Kaneko N (2009) Early effect of lipid-lowering therapy with  
15  
16 513 pitavastatin on regression of coronary atherosclerotic plaque. Comparison with  
17  
18 514 atorvastatin. *Circ J* 73(8):1466-72.  
19  
20 515 45.Xu K, Han YL, Jing QM, Wang SL, Ma YY, Luan B, Wang ZL, Wang DM (2007)  
21  
22 516 Lipid-modifying therapy in diabetic patients with high plasma non-high-density  
23  
24 517 lipoprotein cholesterol after percutaneous coronary intervention. *Exp Clin Cardiol*  
25  
26 518 12(1):48-50.  
27  
28 519 46.Bae JH, Bassenge E, Kim KY, Synn YC, Park KR, Schwemmer M (2004) Effects  
29  
30 520 of low-dose atorvastatin on vascular responses in patients undergoing percutaneous  
31  
32 521 coronary intervention with stenting. *J Cardiovasc Pharmacol Ther* 9(3):185-92.  
33  
34 522 47.Serruys PW, de Feyter P, Macaya C, Kokott N, Puel J, Vrolix M, Branzi A,  
35  
36 523 Bertolami MC, Jackson G, Strauss B, Meier B, Lescol Intervention Prevention Study I  
37  
38 524 (2002) Fluvastatin for prevention of cardiac events following successful first  
39  
40 525 percutaneous coronary intervention: a randomized controlled trial. *JAMA*  
41  
42 526 287(24):3215-22.  
43  
44 527 48.Mulder HJ, Bal ET, Jukema JW, Zwinderman AH, Schalij MJ, van Boven AJ,  
45  
46 528 Brusckhe AV (2000) Pravastatin reduces restenosis two years after percutaneous  
47  
48 529 transluminal coronary angioplasty (REGRESS trial). *Am J Cardiol* 86(7):742-6.  
49  
50  
51  
52  
53  
54  
55  
56  
57  
58  
59  
60

- 1  
2  
3  
4 530 49.Flaker GC, Warnica JW, Sacks FM, Moye LA, Davis BR, Rouleau JL, Webel RR,  
5  
6  
7 531 Pfeffer MA, Braunwald E (1999) Pravastatin prevents clinical events in  
8  
9  
10 532 revascularized patients with average cholesterol concentrations. Cholesterol and  
11  
12 533 Recurrent Events CARE Investigators. *J Am Coll Cardiol* 34(1):106-12.  
13  
14 534 50.Bertrand ME, McFadden EP, Fruchart JC, Van Belle E, Commeau P, Grollier G,  
15  
16  
17 535 Bassand JP, Machecourt J, Cassagnes J, Mossard JM, Vacheron A, Castaigne A,  
18  
19  
20 536 Danchin N, Lablanche JM (1997) Effect of pravastatin on angiographic restenosis  
21  
22 537 after coronary balloon angioplasty. The PREDICT Trial Investigators. Prevention of  
23  
24 538 Restenosis by Elisor after Transluminal Coronary Angioplasty. *J Am Coll Cardiol*  
25  
26  
27 539 30(4):863-9.  
28  
29  
30 540 51.O'Keefe JH, Jr., Stone GW, McCallister BD, Jr., Maddex C, Ligon R, Kacich RL,  
31  
32  
33 541 Kahn J, Caverro PG, Hartzler GO, McCallister BD (1996) Lovastatin plus probucol for  
34  
35 542 prevention of restenosis after percutaneous transluminal coronary angioplasty. *Am J*  
36  
37  
38 543 *Cardiol* 77(8):649-52.  
39  
40  
41 544 52.Onaka H, Hirota Y, Kita Y, Tsuji R, Ishii K, Ishimura T, Kawamura K (1994) The  
42  
43 545 effect of pravastatin on prevention of restenosis after successful percutaneous  
44  
45 546 transluminal coronary angioplasty. *Jpn Circ J* 58(2):100-6.  
47  
48  
49 547 53.Sahni R, Maniet AR, Voci G, Banka VS (1991) Prevention of restenosis by  
50  
51 548 lovastatin after successful coronary angioplasty. *Am Heart J* 121(6 Pt 1):1600-8.  
52  
53  
54 549 54.Kita Y, Watanabe M, Kamon D, Ueda T, Soeda T, Okayama S, Ishigami K,  
55  
56 550 Kawata H, Horii M, Inoue F, Doi N, Okura H, Uemura S, Saito Y (2020) Effects of  
57  
58 551 Fatty Acid Therapy in Addition to Strong Statin on Coronary Plaques in Acute  
59  
60

- 1  
2  
3  
4 552 Coronary Syndrome: An Optical Coherence Tomography Study. *J Am Heart Assoc*  
5  
6 553 9(16):e015593.  
7  
8  
9 554 55.Zhang BH, Yin F, Qiao YN, Guo SD (2022) Triglyceride and Triglyceride-Rich  
10  
11 555 Lipoproteins in Atherosclerosis. *Front Mol Biosci* 9:909151.  
12  
13  
14 556 56. Bhatt DL, Steg PG, Miller M, Brinton EA, Jacobson TA, Ketchum SB, Doyle  
15  
16 557 RT, Jr., Juliano RA, Jiao L, Granowitz C, Tardif JC, Ballantyne CM, Investigators R-I  
17  
18 558 (2019) Cardiovascular Risk Reduction with Icosapent Ethyl for  
19  
20 559 Hypertriglyceridemia. *N Engl J Med* 380(1):11-22.  
21  
22  
23 560 57.Strilchuk L, Tocci G, Fogacci F, Cicero AFG (2020) An overview of  
24  
25 561 rosuvastatin/ezetimibe association for the treatment of hypercholesterolemia and  
26  
27 562 mixed dyslipidemia. *Expert Opin Pharmacother* 21(5):531-9.  
28  
29  
30 563 58.Mach F, Baigent C, Catapano AL, Koskinas KC, Casula M, Badimon L, Chapman  
31  
32 564 MJ, De Backer GG, Delgado V, Ference BA, Graham IM, Halliday A, Landmesser U,  
33  
34 565 Mihaylova B, Pedersen TR, Riccardi G, Richter DJ, Sabatine MS, Taskinen MR,  
35  
36 566 Tokgozoglul, Wiklund O, Group ESCSD (2019) 2019 ESC/EAS Guidelines for the  
37  
38 567 management of dyslipidaemias: lipid modification to reduce cardiovascular risk. *Eur*  
39  
40 568 *Heart J* 41(1):111-88.  
41  
42  
43 569 59.Ray KK, Del Prato S, Muller-Wieland D, Cariou B, Colhoun HM, Tinahones FJ,  
44  
45 570 Domenger C, Letierce A, Mandel J, Samuel R, Bujas-Bobanovic M, Leiter LA (2019)  
46  
47 571 Alirocumab therapy in individuals with type 2 diabetes mellitus and atherosclerotic  
48  
49 572 cardiovascular disease: analysis of the ODYSSEY DM-DYSLIPIDEMIA and DM-  
50  
51 573 INSULIN studies. *Cardiovasc Diabetol* 18(1):149.  
52  
53  
54  
55  
56  
57  
58  
59  
60

- 1  
2  
3  
4 574 60.Lin Y, Parco C, Karathanos A, Krieger T, Schulze V, Chernyak N, Icks A, Kelm  
5  
6 575 M, Brockmeyer M, Wolff G (2022) Clinical efficacy and safety outcomes of  
7  
8 576 bempedoic acid for LDL-C lowering therapy in patients at high cardiovascular risk: a  
9  
10 577 systematic review and meta-analysis. *BMJ Open* 12(2):e048893.  
11  
12  
13 578 61.Wang X, Wen D, Chen Y, Ma L, You C (2022) PCSK9 inhibitors for secondary  
14  
15 579 prevention in patients with cardiovascular diseases: a bayesian network meta-analysis.  
16  
17 580 *Cardiovasc Diabetol* 21(1):107.  
18  
19 581 62.Schmidt AF, Carter JL, Pearce LS, Wilkins JT, Overington JP, Hingorani AD,  
20  
21 582 Casas JP (2020) PCSK9 monoclonal antibodies for the primary and secondary  
22  
23 583 prevention of cardiovascular disease. *Cochrane Database Syst Rev* 10:CD011748.  
24  
25 584 63.An SJ, Kim TJ, Yoon BW (2017) Epidemiology, Risk Factors, and Clinical  
26  
27 585 Features of Intracerebral Hemorrhage: An Update. *J Stroke* 19(1):3-10.  
28  
29 586 64.Pasta A, Cremonini AL, Pisciotta L, Buscaglia A, Porto I, Barra F, Ferrero S,  
30  
31 587 Brunelli C, Rosa GM (2020) PCSK9 inhibitors for treating hypercholesterolemia.  
32  
33 588 *Expert Opin Pharmacother* 21(3):353-63.  
34  
35 589 65.Oesterle A, Laufs U, Liao JK (2017) Pleiotropic Effects of Statins on the  
36  
37 590 Cardiovascular System. *Circ Res* 120(1):229-43.  
38  
39 591 66.Yang T, Fu X, Fu P, Chen J, Xu C, Liu X, Niu T (2021) The value of fragmented  
40  
41 592 QRS in predicting the prognosis of chronic total occlusion patients with myocardial  
42  
43 593 infarction history undergoing percutaneous coronary intervention: A 24-months  
44  
45 594 follow-up study. *Clin Cardiol* 44(4):537-46.  
46  
47 595 67.Ndrepepa G, Holdenrieder S, Cassese S, Xhepa E, Fusaro M, Kastrati A (2020)

- 1  
2  
3  
4 596 Hypocholesterolaemia and mortality in patients with coronary artery disease. *Eur J*  
5  
6  
7 597 *Clin Invest* 50(2):e13194.  
8  
9 598 68.Sia CH, Zheng H, Ho AF, Bulluck H, Chong J, Foo D, Foo LL, Lim PZY, Liew  
10  
11 599 BW, Tan HC, Yeo TC, Chua TSJ, Chan MY, Hausenloy DJ (2020) The Lipid  
12  
13 600 Paradox is present in ST-elevation but not in non-ST-elevation myocardial infarction  
14  
15 601 patients: Insights from the Singapore Myocardial Infarction Registry. *Sci Rep*  
16  
17 602 10(1):6799.  
18  
19 603 69.Sun H, Li Z, Song X, Liu H, Li Y, Hao Y, Teng T, Liu J, Liu J, Zhao D, Zhou X,  
20  
21 604 Yang Q, Investigators C-A (2021) Revisiting the lipid paradox in ST-elevation  
22  
23 605 myocardial infarction in the Chinese population: findings from the CCC-ACS project.  
24  
25 606 *Eur Heart J Acute Cardiovasc Care* 10(9):978-87.  
26  
27 607 70.Guedeney P, Claessen BE, Kalkman DN, Aquino M, Sorrentino S, Giustino G,  
28  
29 608 Farhan S, Vogel B, Sartori S, Montalescot G, Sweeny J, Kovacic JC, Krishnan P,  
30  
31 609 Barman N, Dangas G, Kini A, Baber U, Sharma S, Mehran R (2019) Residual  
32  
33 610 Inflammatory Risk in Patients With Low LDL Cholesterol Levels Undergoing  
34  
35 611 Percutaneous Coronary Intervention. *J Am Coll Cardiol* 73(19):2401-9.  
36  
37 612 71.Razzouk L, Muntner P, Bansilal S, Kini AS, Aneja A, Mozes J, Ivan O, Jakkula M,  
38  
39 613 Sharma S, Farkouh ME (2009) C-reactive protein predicts long-term mortality  
40  
41 614 independently of low-density lipoprotein cholesterol in patients undergoing  
42  
43 615 percutaneous coronary intervention. *Am Heart J* 158(2):277-83.  
44  
45 616 72.Abbate A, Biondi-Zoccai GG, Appleton DL, Erne P, Schoenenberger AW,  
46  
47 617 Lipinski MJ, Agostoni P, Sheiban I, Vetrovec GW (2008) Survival and cardiac  
48  
49  
50  
51  
52  
53  
54  
55  
56  
57  
58  
59  
60



1  
2  
3  
4 618 remodeling benefits in patients undergoing late percutaneous coronary intervention of  
5  
6 619 the infarct-related artery: evidence from a meta-analysis of randomized controlled  
7  
8  
9 620 trials. *J Am Coll Cardiol* 51(9):956-64.

11 621 **Figure 1.** Flowchart of the study selection process for eligible studies

14 622 **Figure 2.** Methodological quality assessment of included studies

17 623 **Figure 3.** Network plots of comparisons for major outcomes included in the analyses.

19 624 A: dichotomous results of MACE based on specific types of statins; B: dichotomous  
21  
22 625 results of MACE based on taking statins as a whole; C: hazard ratio results of MACE  
23  
24 626 based on specific types of statins; D: hazard ratio results of MACE based on taking  
25  
26 627 statins as a whole; E: dichotomous results of mortality based on specific types of  
27  
28 628 statins; F: dichotomous results of mortality based on taking statins as a whole.

32 629 **Figure 4.** Forest plots of lipid-lowering therapy compare to control for outcomes in  
34  
35 630 network meta-analysis with SUCRA ranking results. A: dichotomous results of  
36  
37 631 MACE based on specific types of statins; B: dichotomous results of MACE based on  
38  
39 632 taking statins as a whole; C: hazard ratio results of MACE based on specific types of  
40  
41 633 statins; D: hazard ratio results of MACE based on taking statins as a whole; E:  
42  
43 634 dichotomous results of mortality based on specific types of statins; F: dichotomous  
44  
45 635 results of mortality based on taking statins as a whole.

50 636 **Figure 5.** The comparison-adjusted funnel plot for assessing all main outcomes. A:  
52  
53 637 dichotomous results of MACE based on specific types of statins; B: dichotomous  
54  
55 638 results of MACE based on taking statins as a whole; C: dichotomous results of  
56  
57 639 mortality based on specific types of statins; D: dichotomous results of mortality based  
58  
59  
60

1  
2  
3  
4 640 on taking statins as a whole.  
5  
6  
7 641  
8  
9 642  
10  
11 643  
12  
13  
14 644  
15  
16  
17 645  
18  
19  
20 646  
21  
22 647  
23  
24  
25 648  
26  
27 649  
28  
29  
30 650  
31  
32 651  
33  
34  
35 652  
36  
37  
38 653  
39  
40 654  
41  
42  
43 655  
44  
45 656  
46  
47  
48 657  
49  
50  
51 658  
52  
53 659  
54  
55  
56 660  
57  
58 661  
59  
60

For peer review only

1  
2  
3  
4  
5  
6  
7  
8  
9  
10  
11  
12  
13  
14  
15  
16  
17  
18  
19  
20  
21  
22  
23  
24  
25  
26  
27  
28  
29  
30  
31  
32  
33  
34  
35  
36  
37  
38  
39  
40  
41  
42  
43  
44  
45  
46  
47  
48  
49  
50  
51  
52  
53  
54  
55  
56  
57  
58  
59  
60

662

663

664

665 **Authors and Afliations**

666 Chang-Jiang Deng, Ju Yan, Ying-Ying Zheng, Ting-Ting Wu, Ying Pan, Xian-Geng

667 Hou, Si-Fan Wang, Subinur·Sirajidin, Mikereyi·Sirajidin, Xiang Xie

668 Chang-Jiang Deng Xian-Geng Hou

669 1187229853@qq.com 380138554@qq.com

670 Ju Yan Si-Fan Wang

671 yyjj2017@163.com 562654119@qq.com

672 Ying-Ying Zheng Subinur·Sirajidin

673 zhengying527@163.com 496568064@qq.com

674 Ting-TingWu

675 Mikereyi·Aimaitijiang

676 1255723526@qq.com 3195676352@qq.com

677 Ying Pan Xiang Xie

678 2475854195@qq.com xiangxie999@sina.com

679 Department of Cardiology, The First Affiliated Hospital of Xinjiang Medical

680 University, Urumqi, 830011, P.R. China.

681

## PRISMA 2020 flow diagram for new systematic reviews which included searches of databases and registers only

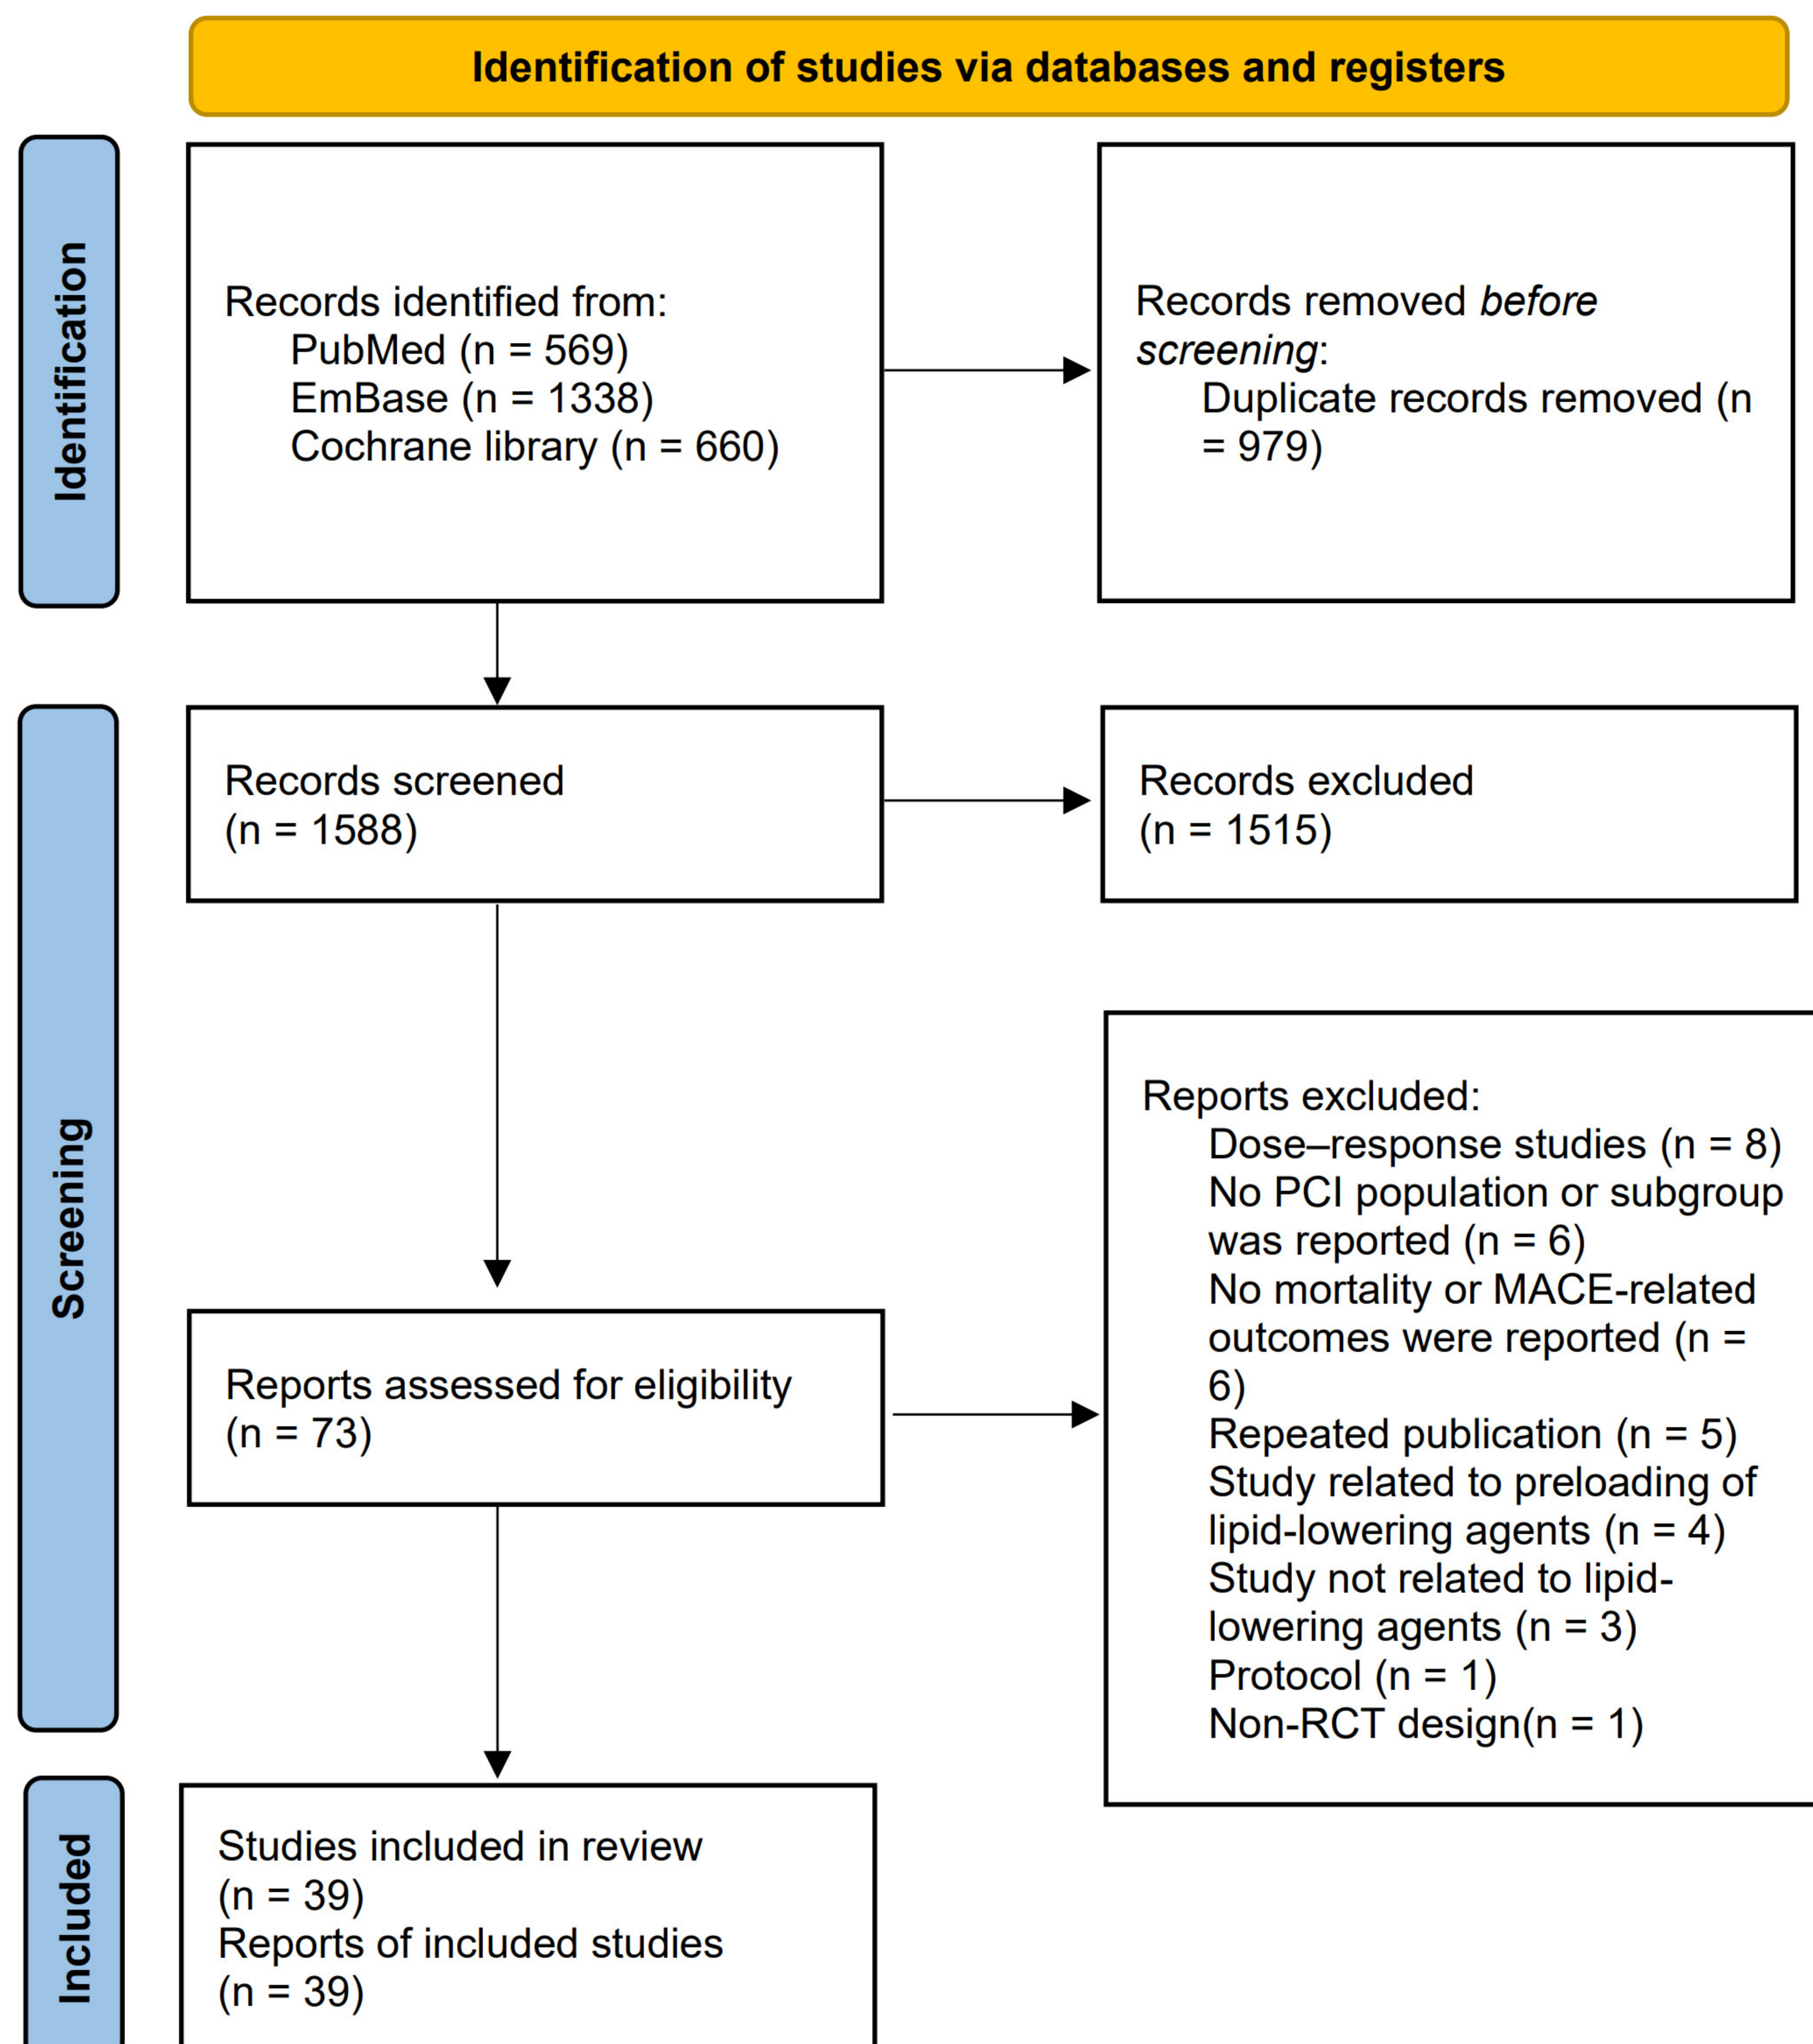

\*Consider, if feasible to do so, reporting the number of records identified from each database or register searched (rather than the total number across all databases/registers).

\*\*If automation tools were used, indicate how many records were excluded by a human and how many were excluded by automation tools.

From: Page MJ, McKenzie JE, Bossuyt PM, Boutron I, Hoffmann TC, Mulrow CD, et al. The PRISMA 2020 statement: an updated guideline for reporting systematic reviews. *BMJ* 2021;372:n71. doi: 10.1136/bmj.n71

For more information, visit: <http://www.prisma-statement.org/>

1  
2  
3  
4  
5  
6  
7  
8  
9  
10  
11  
12  
13  
14  
15  
16  
17  
18  
19  
20  
21  
22  
23  
24  
25  
26  
27  
28  
29  
30  
31  
32  
33  
34  
35  
36  
37  
38  
39  
40  
41  
42  
43  
44  
45  
46  
47  
48  
49  
50  
51  
52  
53  
54  
55  
56  
57  
58  
59  
60

|                            | Random sequence generation (selection bias) | Allocation concealment (selection bias) | Blinding of participants and personnel (performance bias) | Blinding of outcome assessment (detection bias) | Incomplete outcome data (attrition bias) | Selective reporting (reporting bias) | Other bias |
|----------------------------|---------------------------------------------|-----------------------------------------|-----------------------------------------------------------|-------------------------------------------------|------------------------------------------|--------------------------------------|------------|
| Bae JH 2004                | ?                                           | ?                                       | -                                                         | -                                               | +                                        | ?                                    | +          |
| C. Michael Gibson 2009     | +                                           | +                                       | +                                                         | +                                               | +                                        | +                                    | +          |
| Christopher P Cannon 2015  | +                                           | +                                       | +                                                         | +                                               | +                                        | +                                    | +          |
| Deng YF 2021               | ?                                           | ?                                       | -                                                         | -                                               | +                                        | +                                    | +          |
| Eui Im 2017                | +                                           | +                                       | -                                                         | +                                               | +                                        | +                                    | +          |
| Greg C. Flaker 1999        | +                                           | +                                       | +                                                         | +                                               | +                                        | +                                    | +          |
| Hagiwara N 2017            | +                                           | ?                                       | -                                                         | +                                               | +                                        | +                                    | +          |
| Han J.G.H. Mulder 2000     | +                                           | +                                       | +                                                         | +                                               | +                                        | +                                    | +          |
| Han Yaling 2009            | +                                           | +                                       | -                                                         | -                                               | +                                        | +                                    | +          |
| Haruhiko Onaka 1994        | ?                                           | ?                                       | -                                                         | -                                               | +                                        | +                                    | +          |
| Hiroyuki Takano 2013       | +                                           | +                                       | -                                                         | +                                               | +                                        | +                                    | +          |
| Jean-Marc Lablanche 2010   | +                                           | +                                       | +                                                         | +                                               | +                                        | +                                    | +          |
| J Guo 2017                 | +                                           | +                                       | -                                                         | -                                               | +                                        | ?                                    | +          |
| J H O'Keefe Jr 1996        | +                                           | +                                       | +                                                         | +                                               | +                                        | +                                    | +          |
| Kazumasa Nosaka 2016       | +                                           | ?                                       | -                                                         | +                                               | +                                        | +                                    | +          |
| Kenichi Tsujita 2015       | +                                           | +                                       | -                                                         | +                                               | +                                        | +                                    | +          |
| Kensuke Matsushita 2016    | ?                                           | ?                                       | -                                                         | -                                               | +                                        | +                                    | +          |
| Kiyoshi Hibi 2018          | +                                           | +                                       | -                                                         | +                                               | +                                        | +                                    | +          |
| Lorenz Räber 2022          | +                                           | +                                       | +                                                         | +                                               | +                                        | +                                    | +          |
| Mario Leoncin 2014         | +                                           | ?                                       | -                                                         | -                                               | +                                        | +                                    | +          |
| MICHEL E. BERTRAND 1997    | +                                           | +                                       | +                                                         | +                                               | +                                        | +                                    | +          |
| Patrick W J C Serruys 2002 | +                                           | +                                       | +                                                         | +                                               | +                                        | +                                    | +          |
| Peterson, B. E. 2022       | +                                           | +                                       | +                                                         | +                                               | +                                        | +                                    | +          |
| Rakesh Sahni 1991          | ?                                           | ?                                       | -                                                         | -                                               | +                                        | +                                    | +          |
| Remo H.M. Furtado 2022     | +                                           | +                                       | ?                                                         | +                                               | +                                        | +                                    | +          |
| Stephen J. Nicholls 2015   | +                                           | +                                       | +                                                         | +                                               | +                                        | +                                    | +          |
| Sun C 2021                 | +                                           | ?                                       | -                                                         | -                                               | +                                        | ?                                    | +          |
| Takafumi Hiro 2009         | +                                           | +                                       | -                                                         | +                                               | +                                        | +                                    | +          |
| Tomoaki Okada 2022         | +                                           | +                                       | +                                                         | ?                                               | +                                        | +                                    | +          |
| Tomotaka Dohi 2009         | +                                           | ?                                       | -                                                         | -                                               | +                                        | +                                    | +          |
| Toru Toi 2009              | ?                                           | +                                       | -                                                         | ?                                               | +                                        | ?                                    | +          |
| Tsuyoshi Nozue 2013        | +                                           | +                                       | -                                                         | -                                               | +                                        | ?                                    | +          |
| Wang YB 2017               | +                                           | ?                                       | -                                                         | -                                               | +                                        | +                                    | +          |
| Watanabe T 2017            | +                                           | ?                                       | -                                                         | -                                               | +                                        | +                                    | +          |
| Weifeng He 2020            | +                                           | +                                       | ?                                                         | ?                                               | +                                        | +                                    | +          |
| Xu Kai 2007                | ?                                           | ?                                       | -                                                         | -                                               | +                                        | +                                    | +          |
| Yan Hao 2022               | ?                                           | ?                                       | -                                                         | -                                               | +                                        | +                                    | +          |
| Zhang JR 2015              | +                                           | ?                                       | -                                                         | -                                               | +                                        | ?                                    | +          |
| Zhi Liu 2017               | +                                           | ?                                       | -                                                         | -                                               | +                                        | +                                    | ?          |

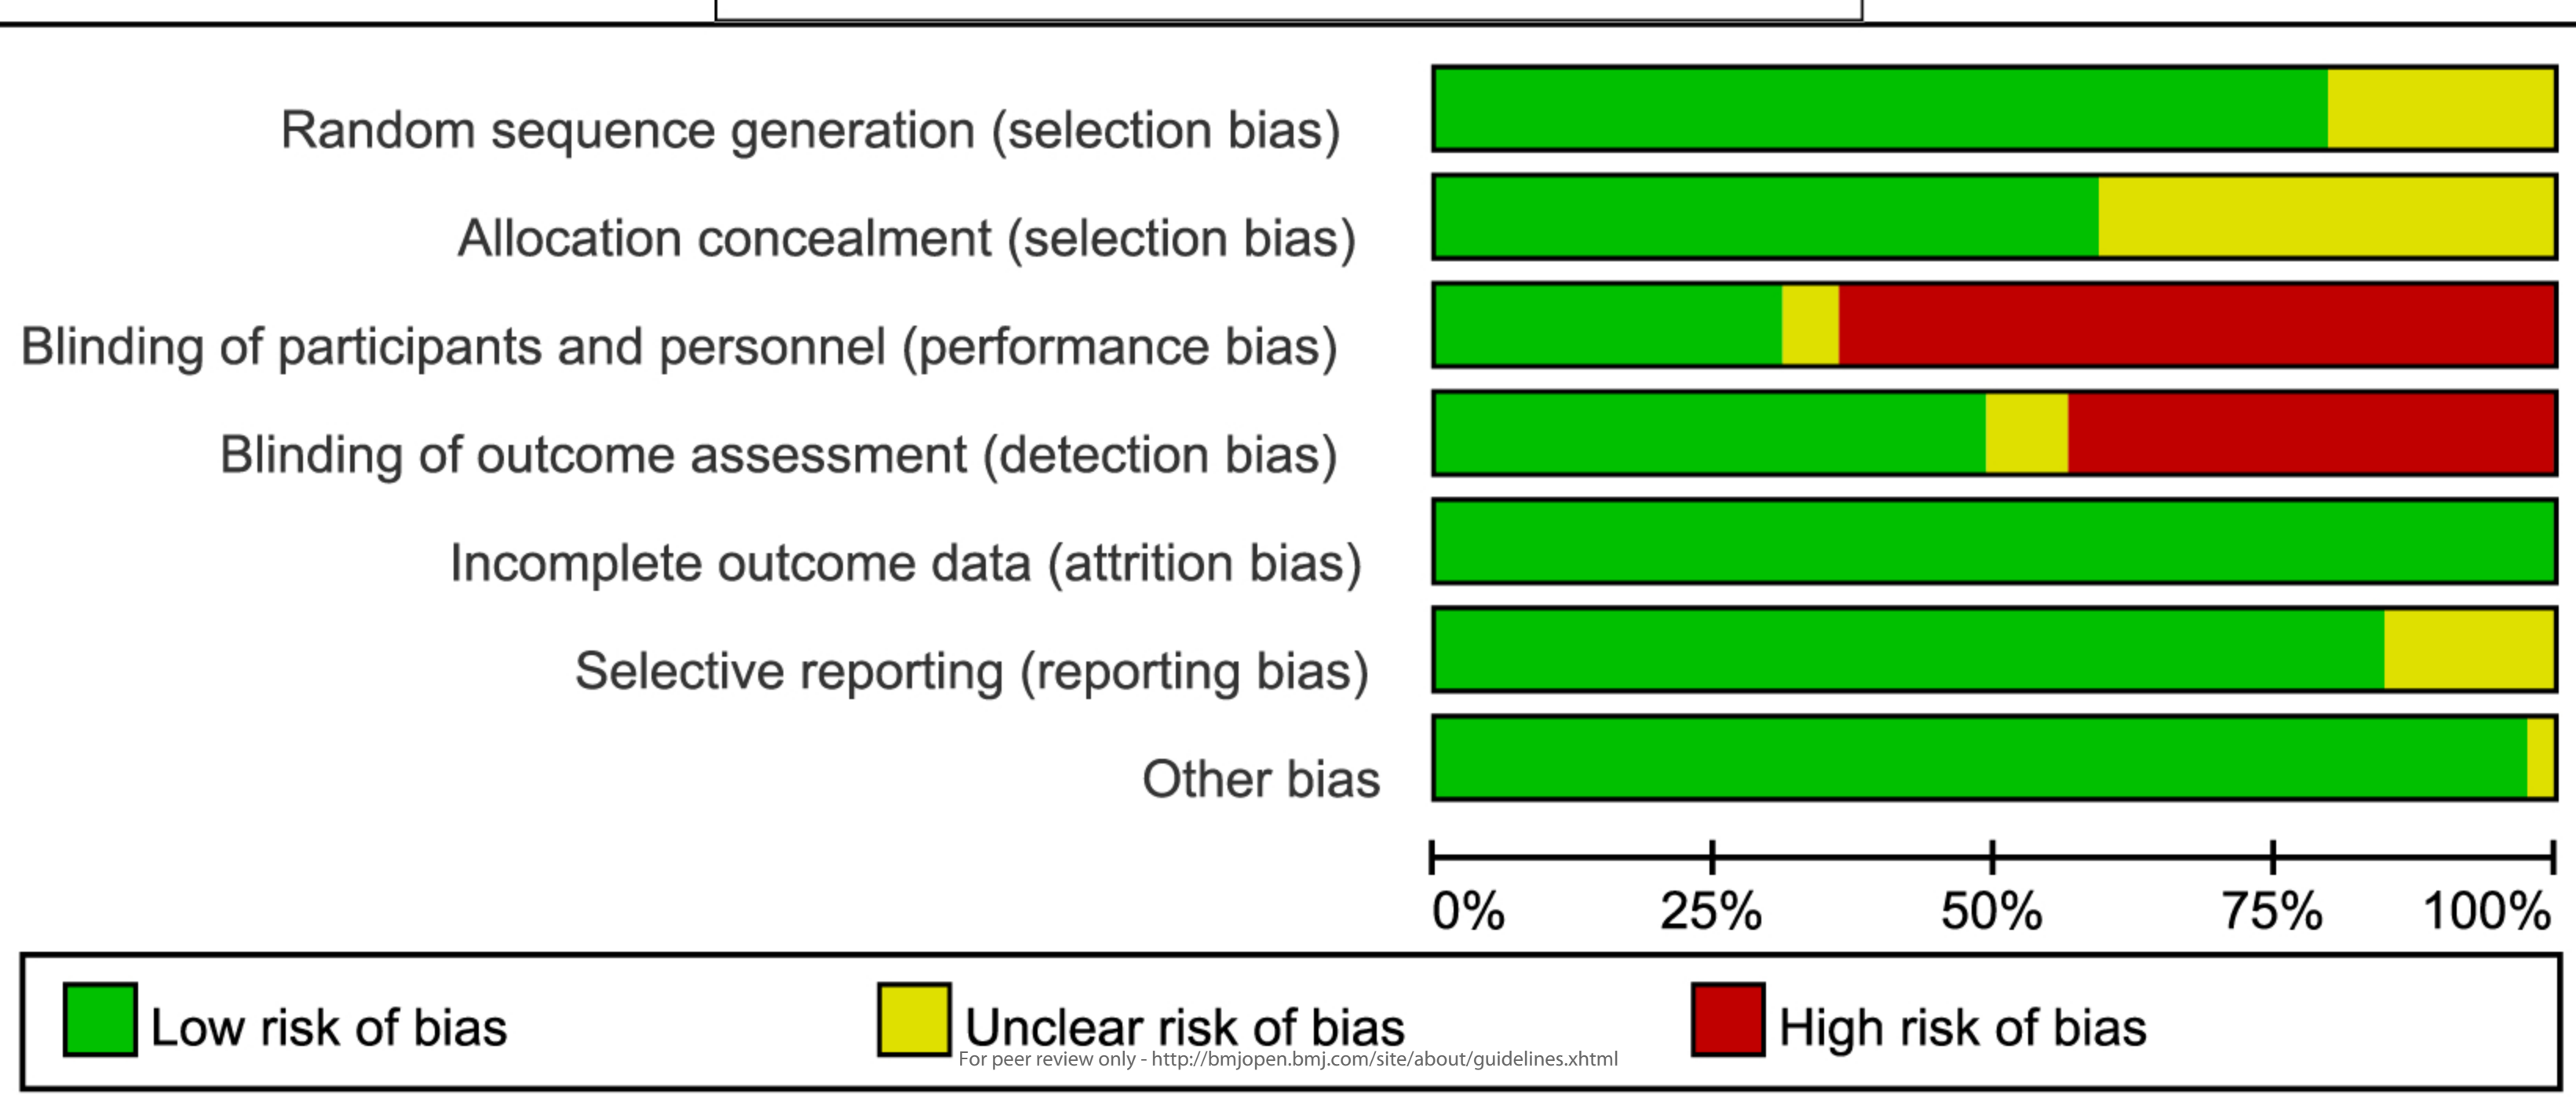

A

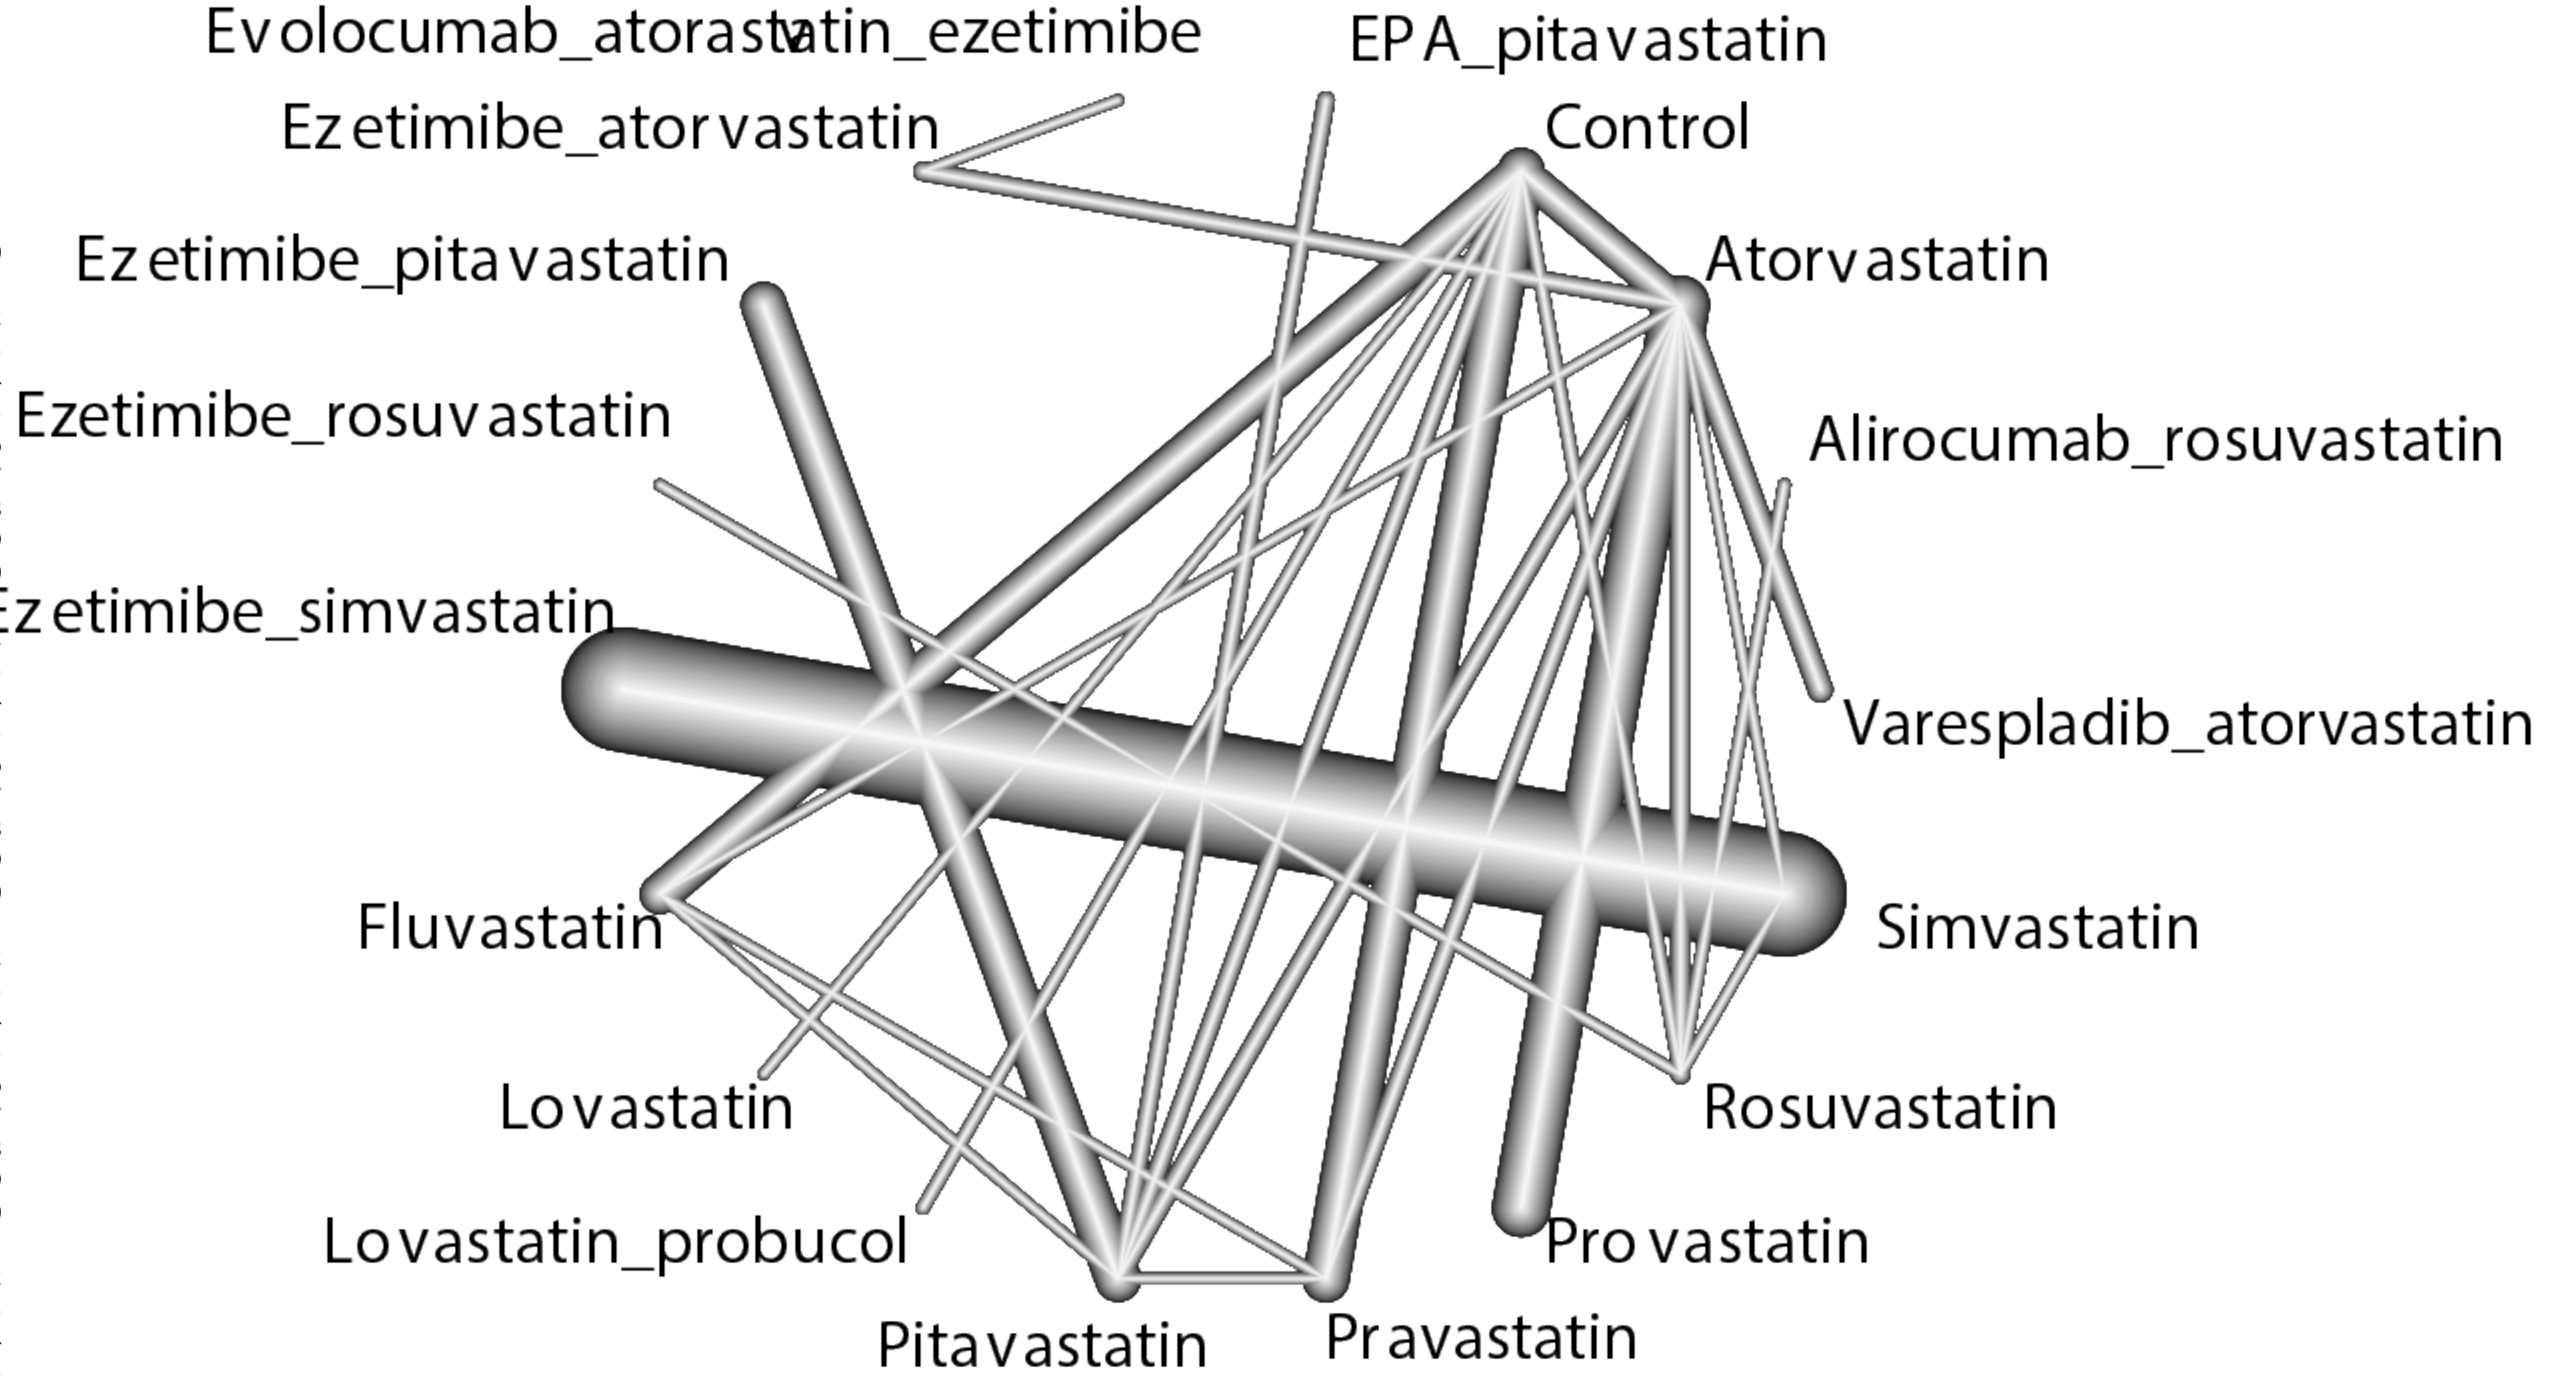

B

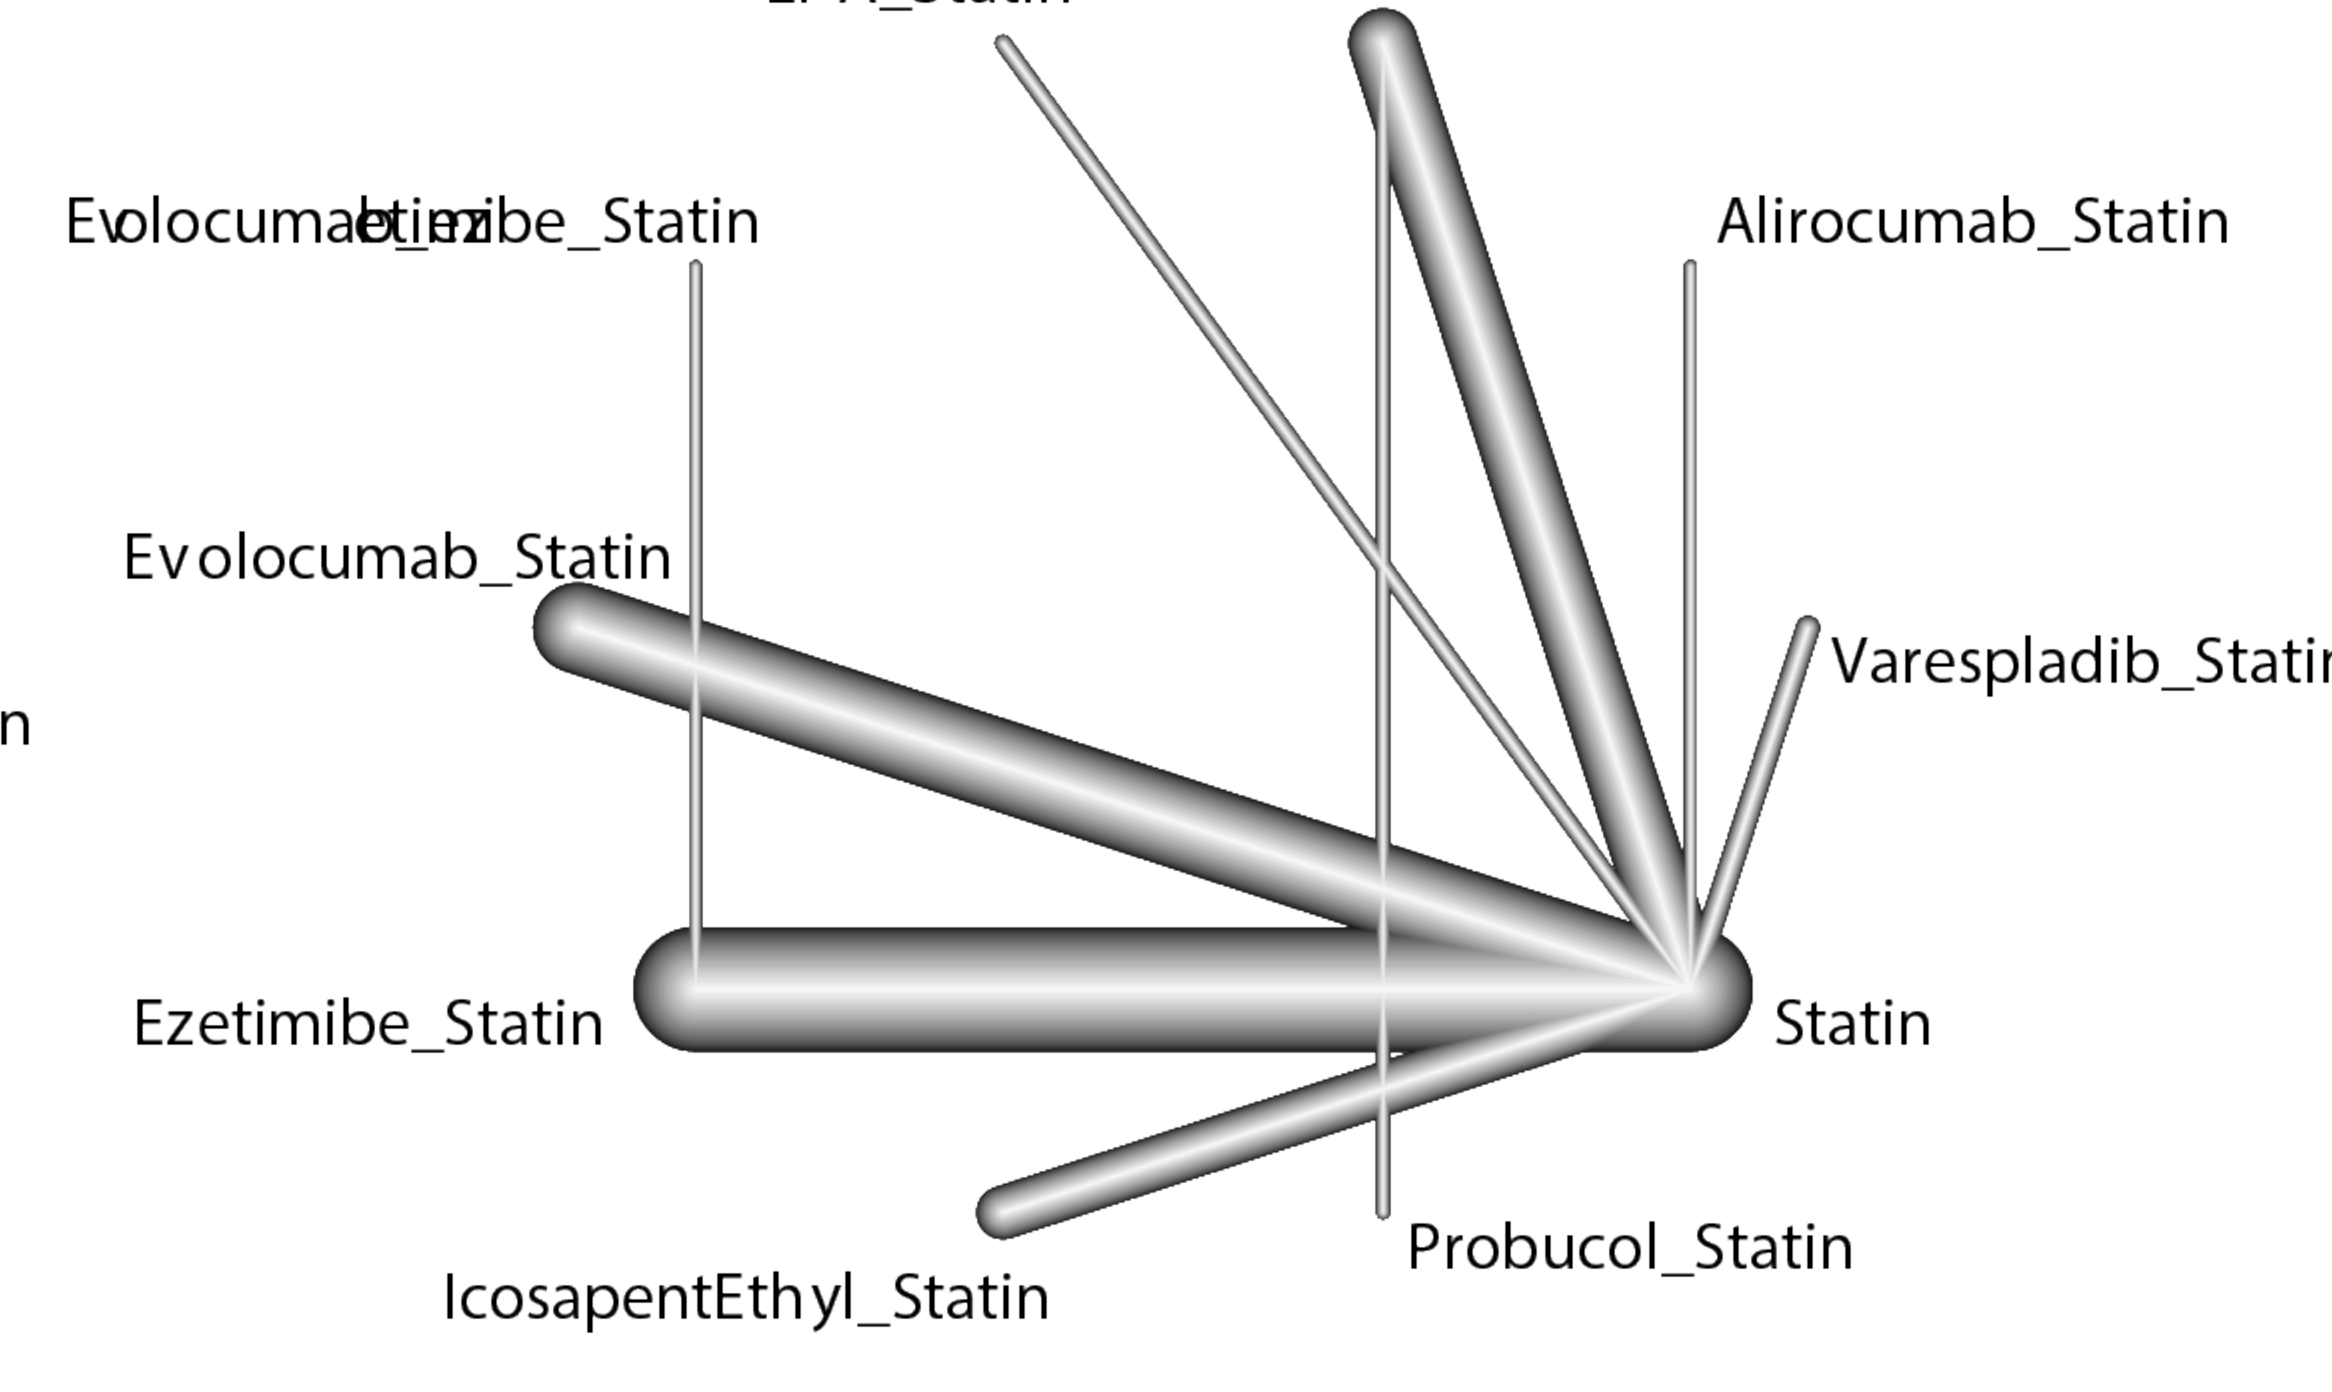

C

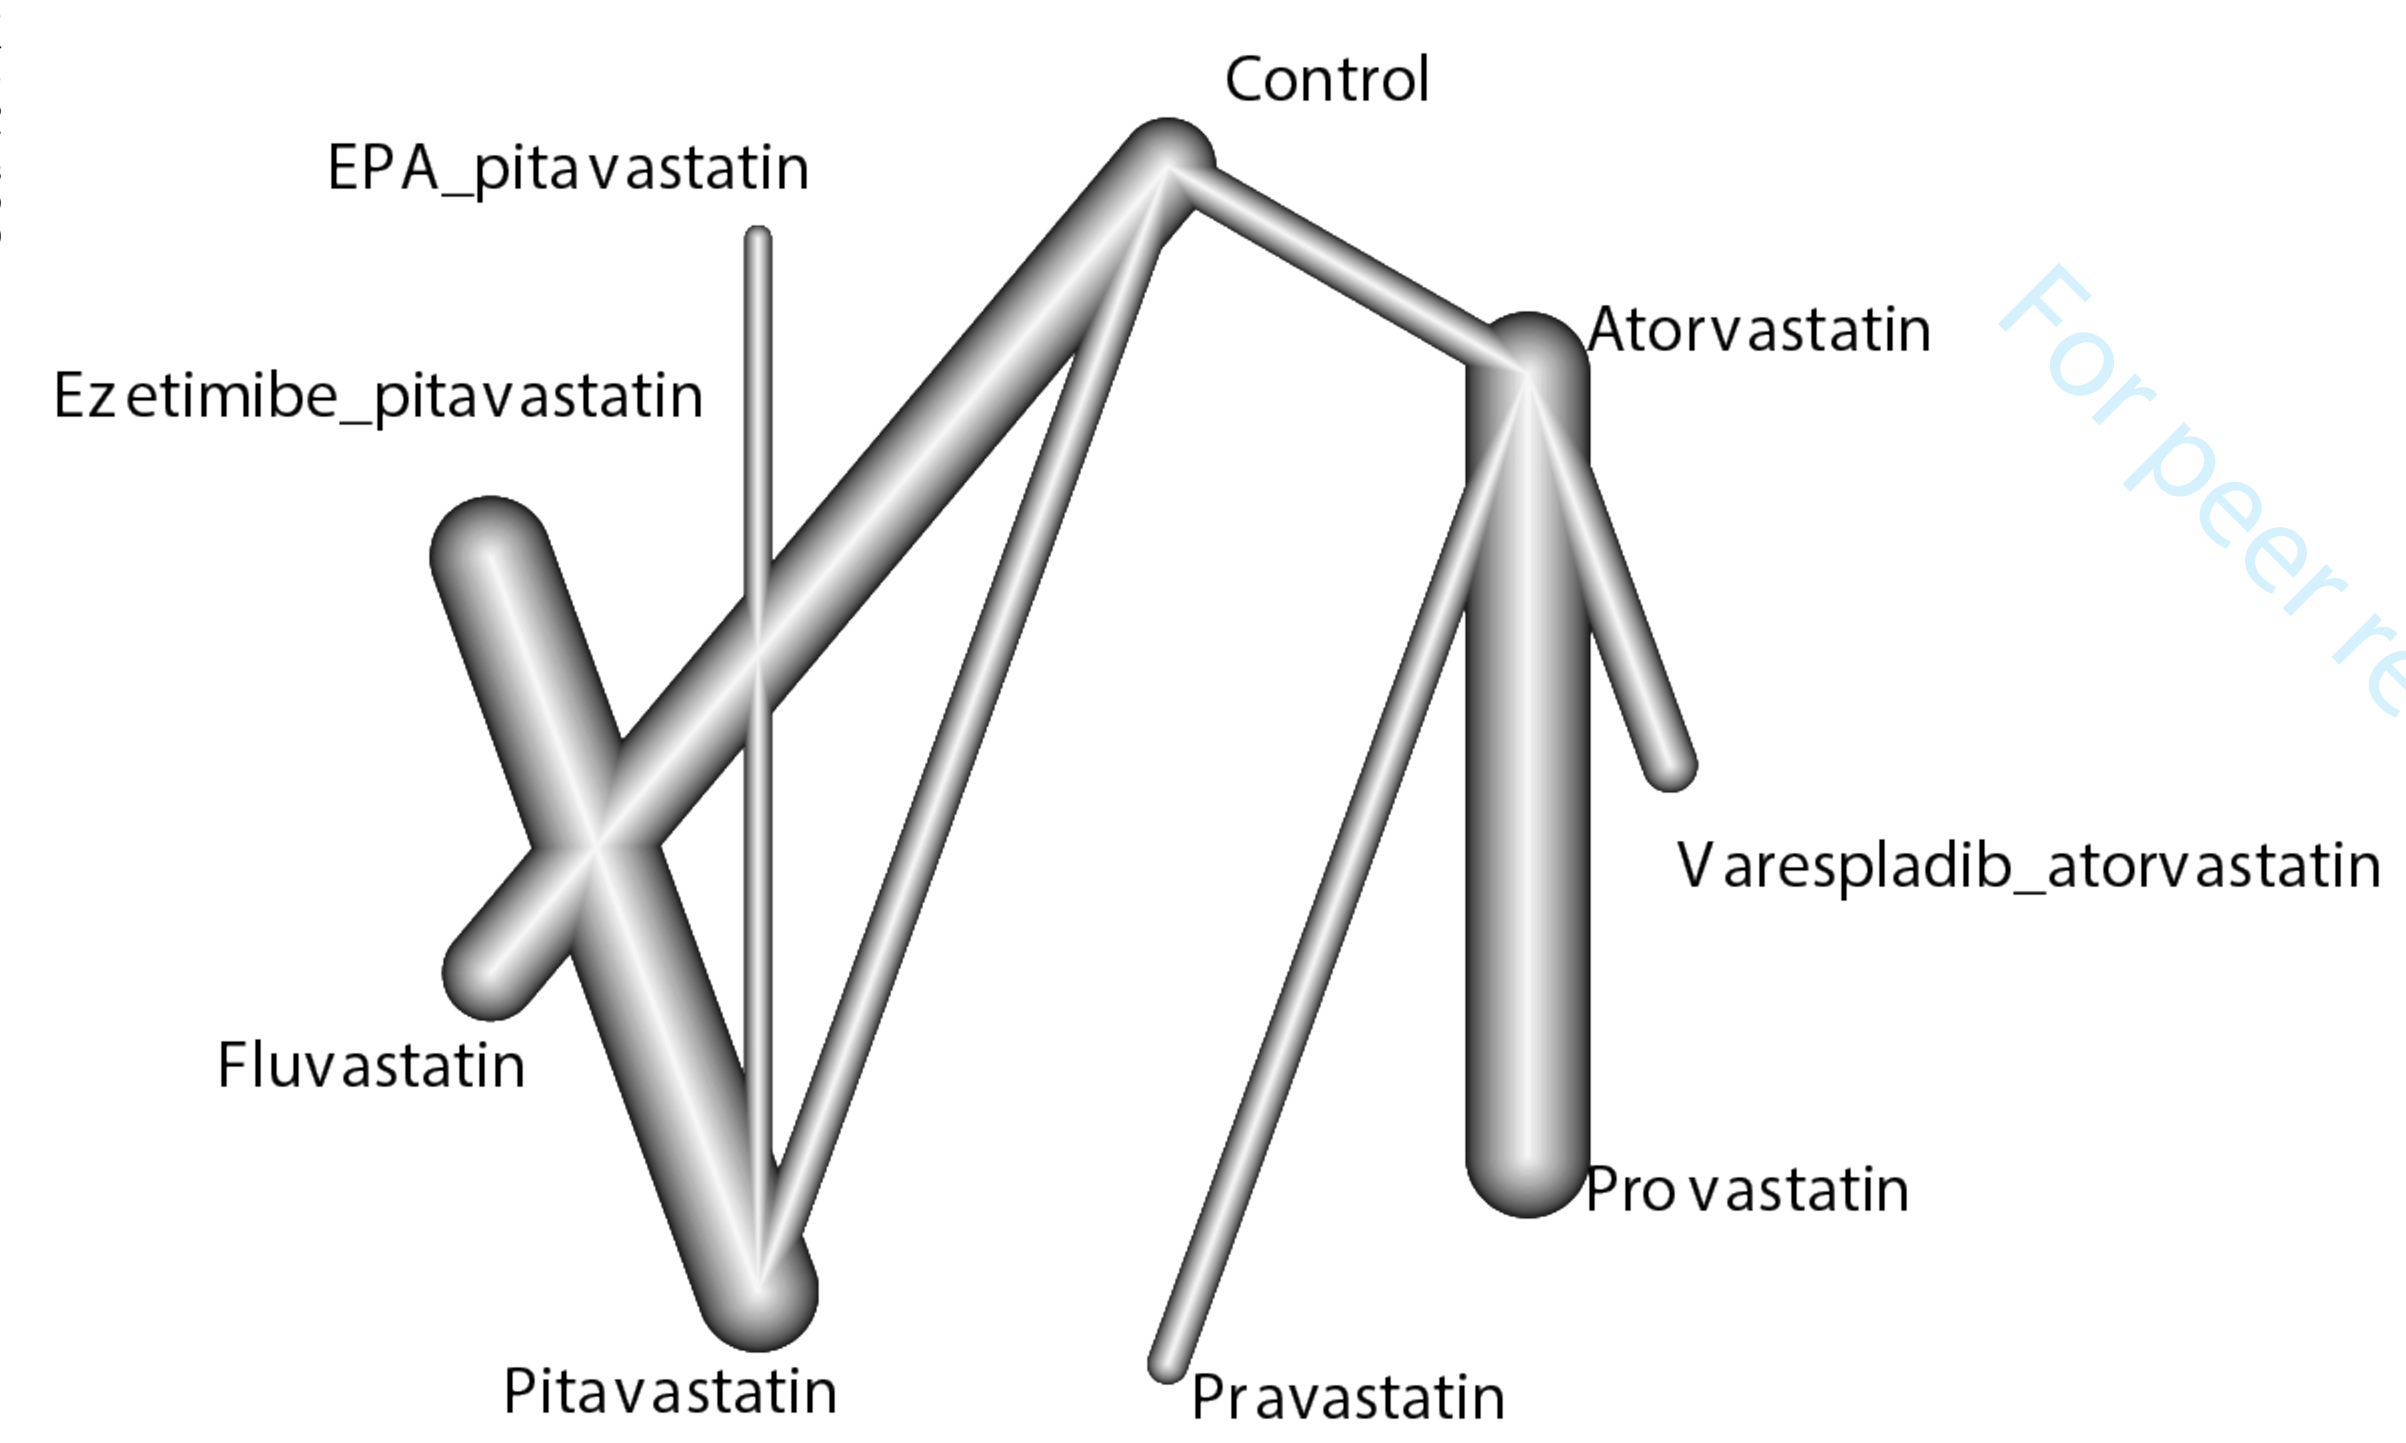

D

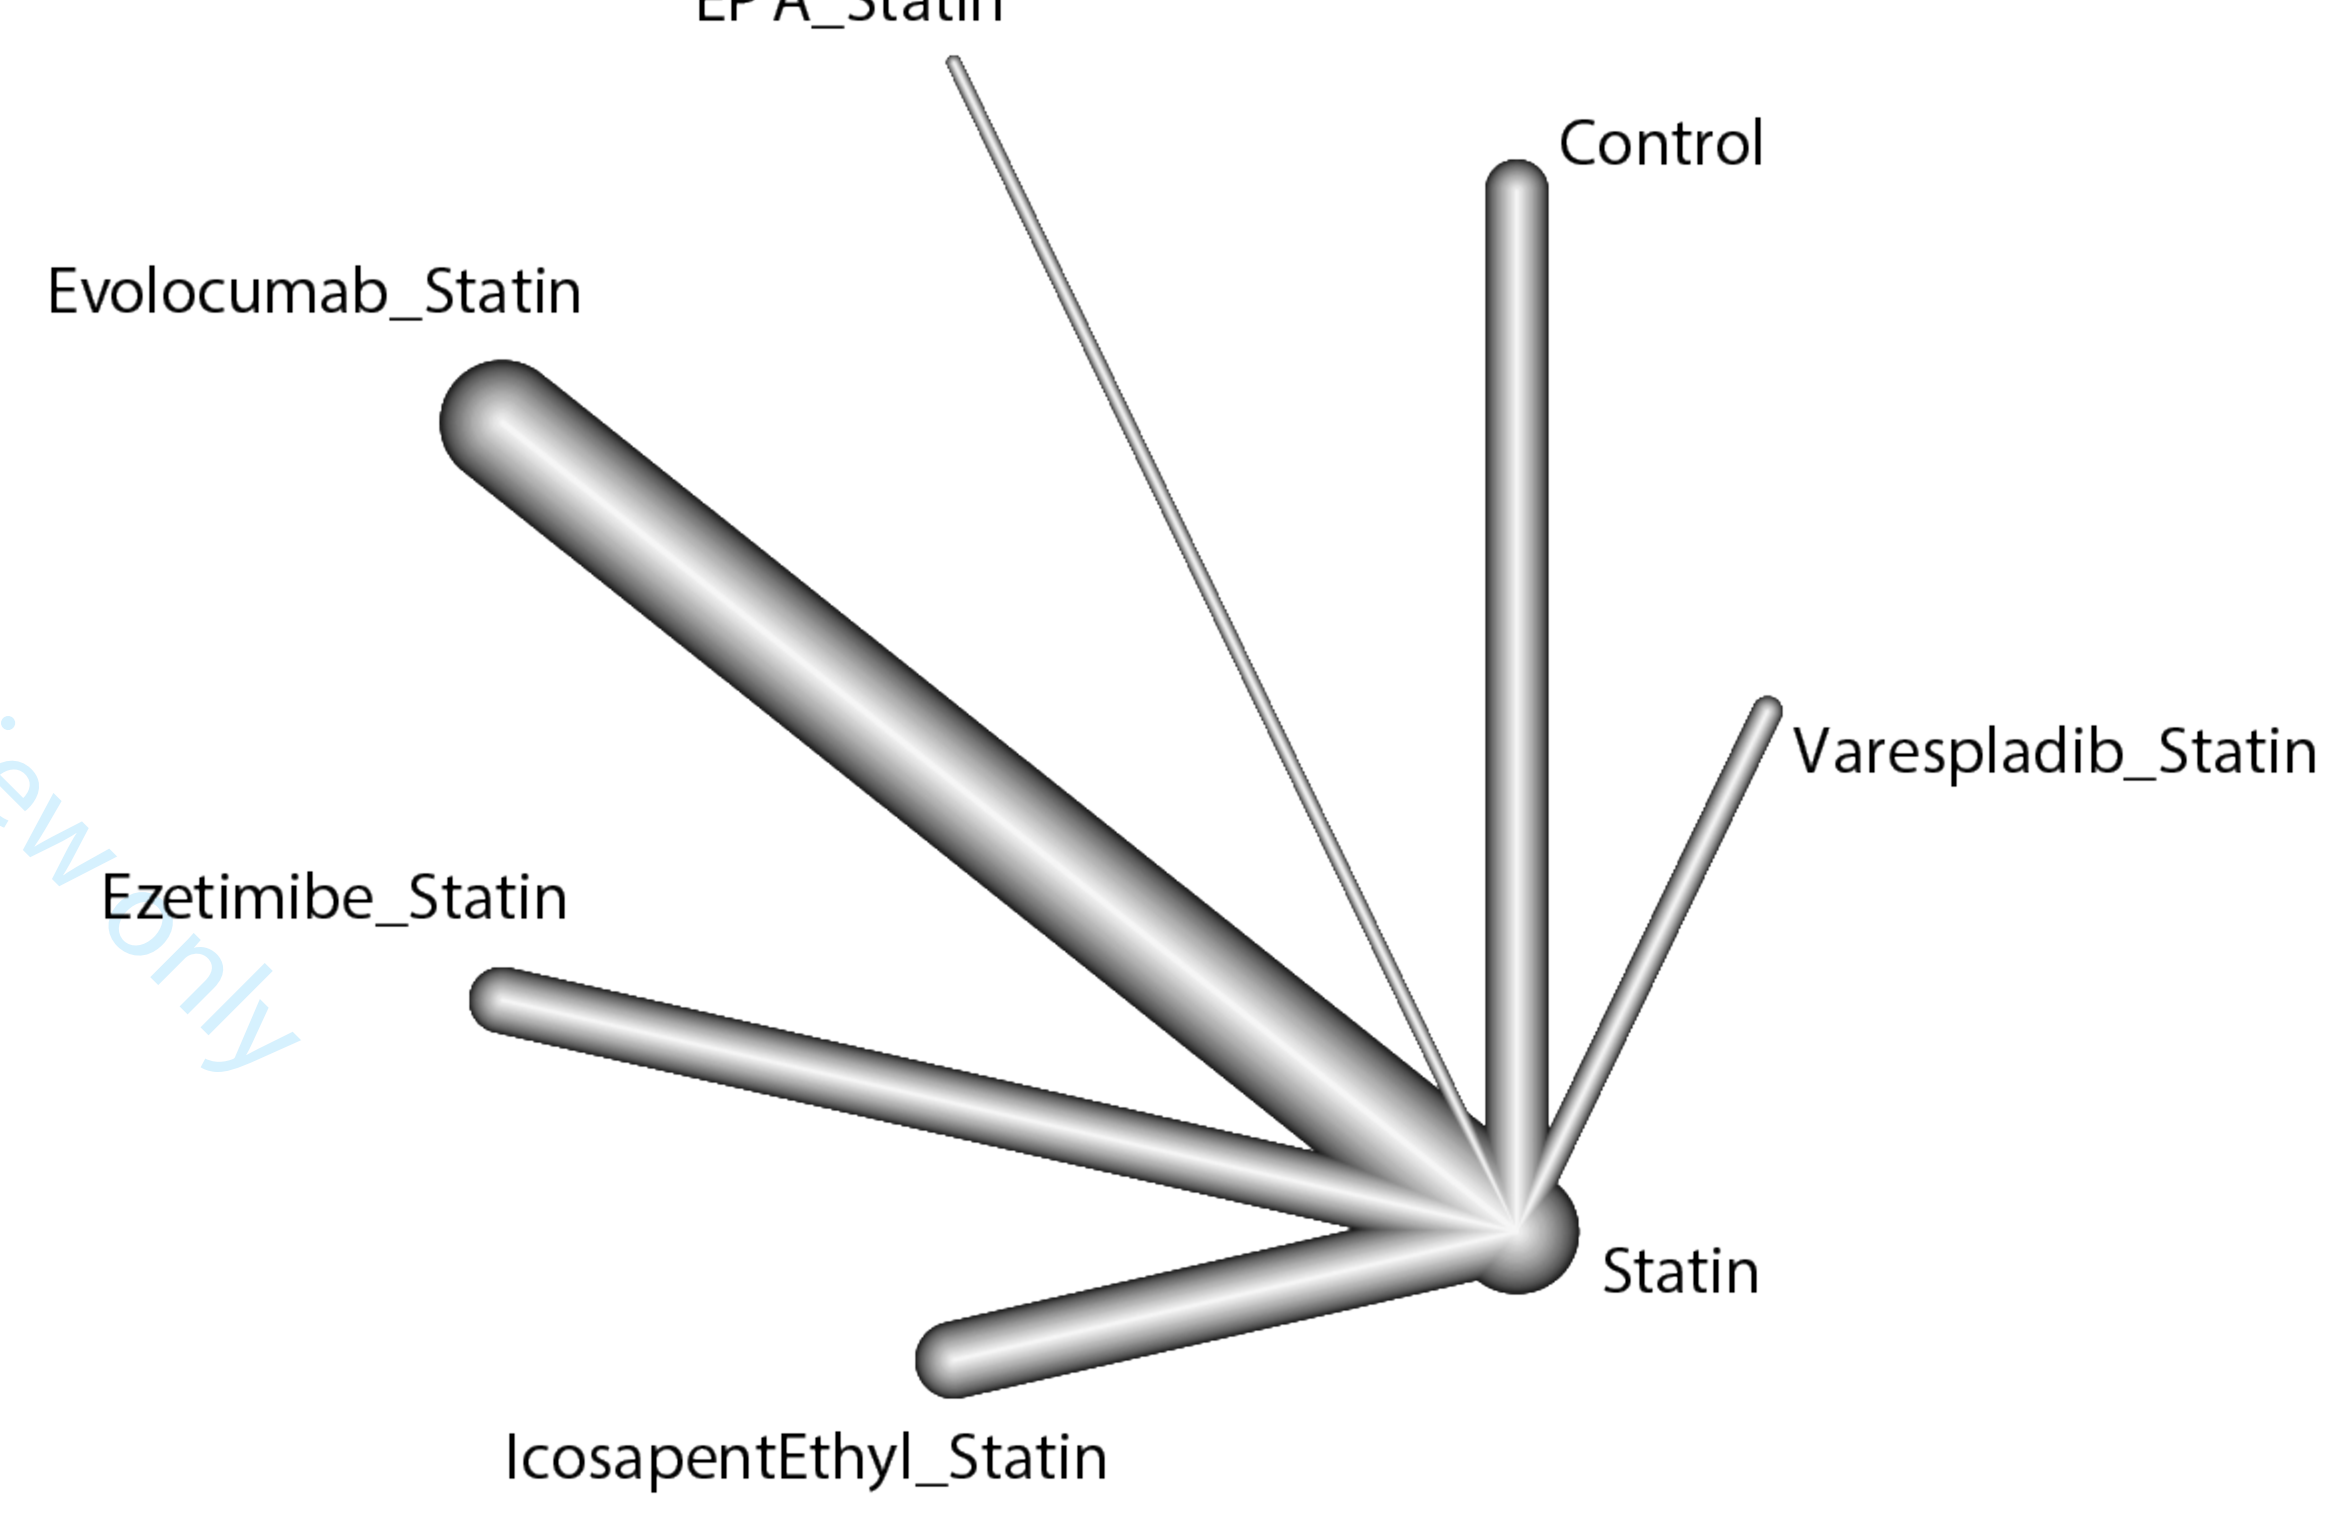

E

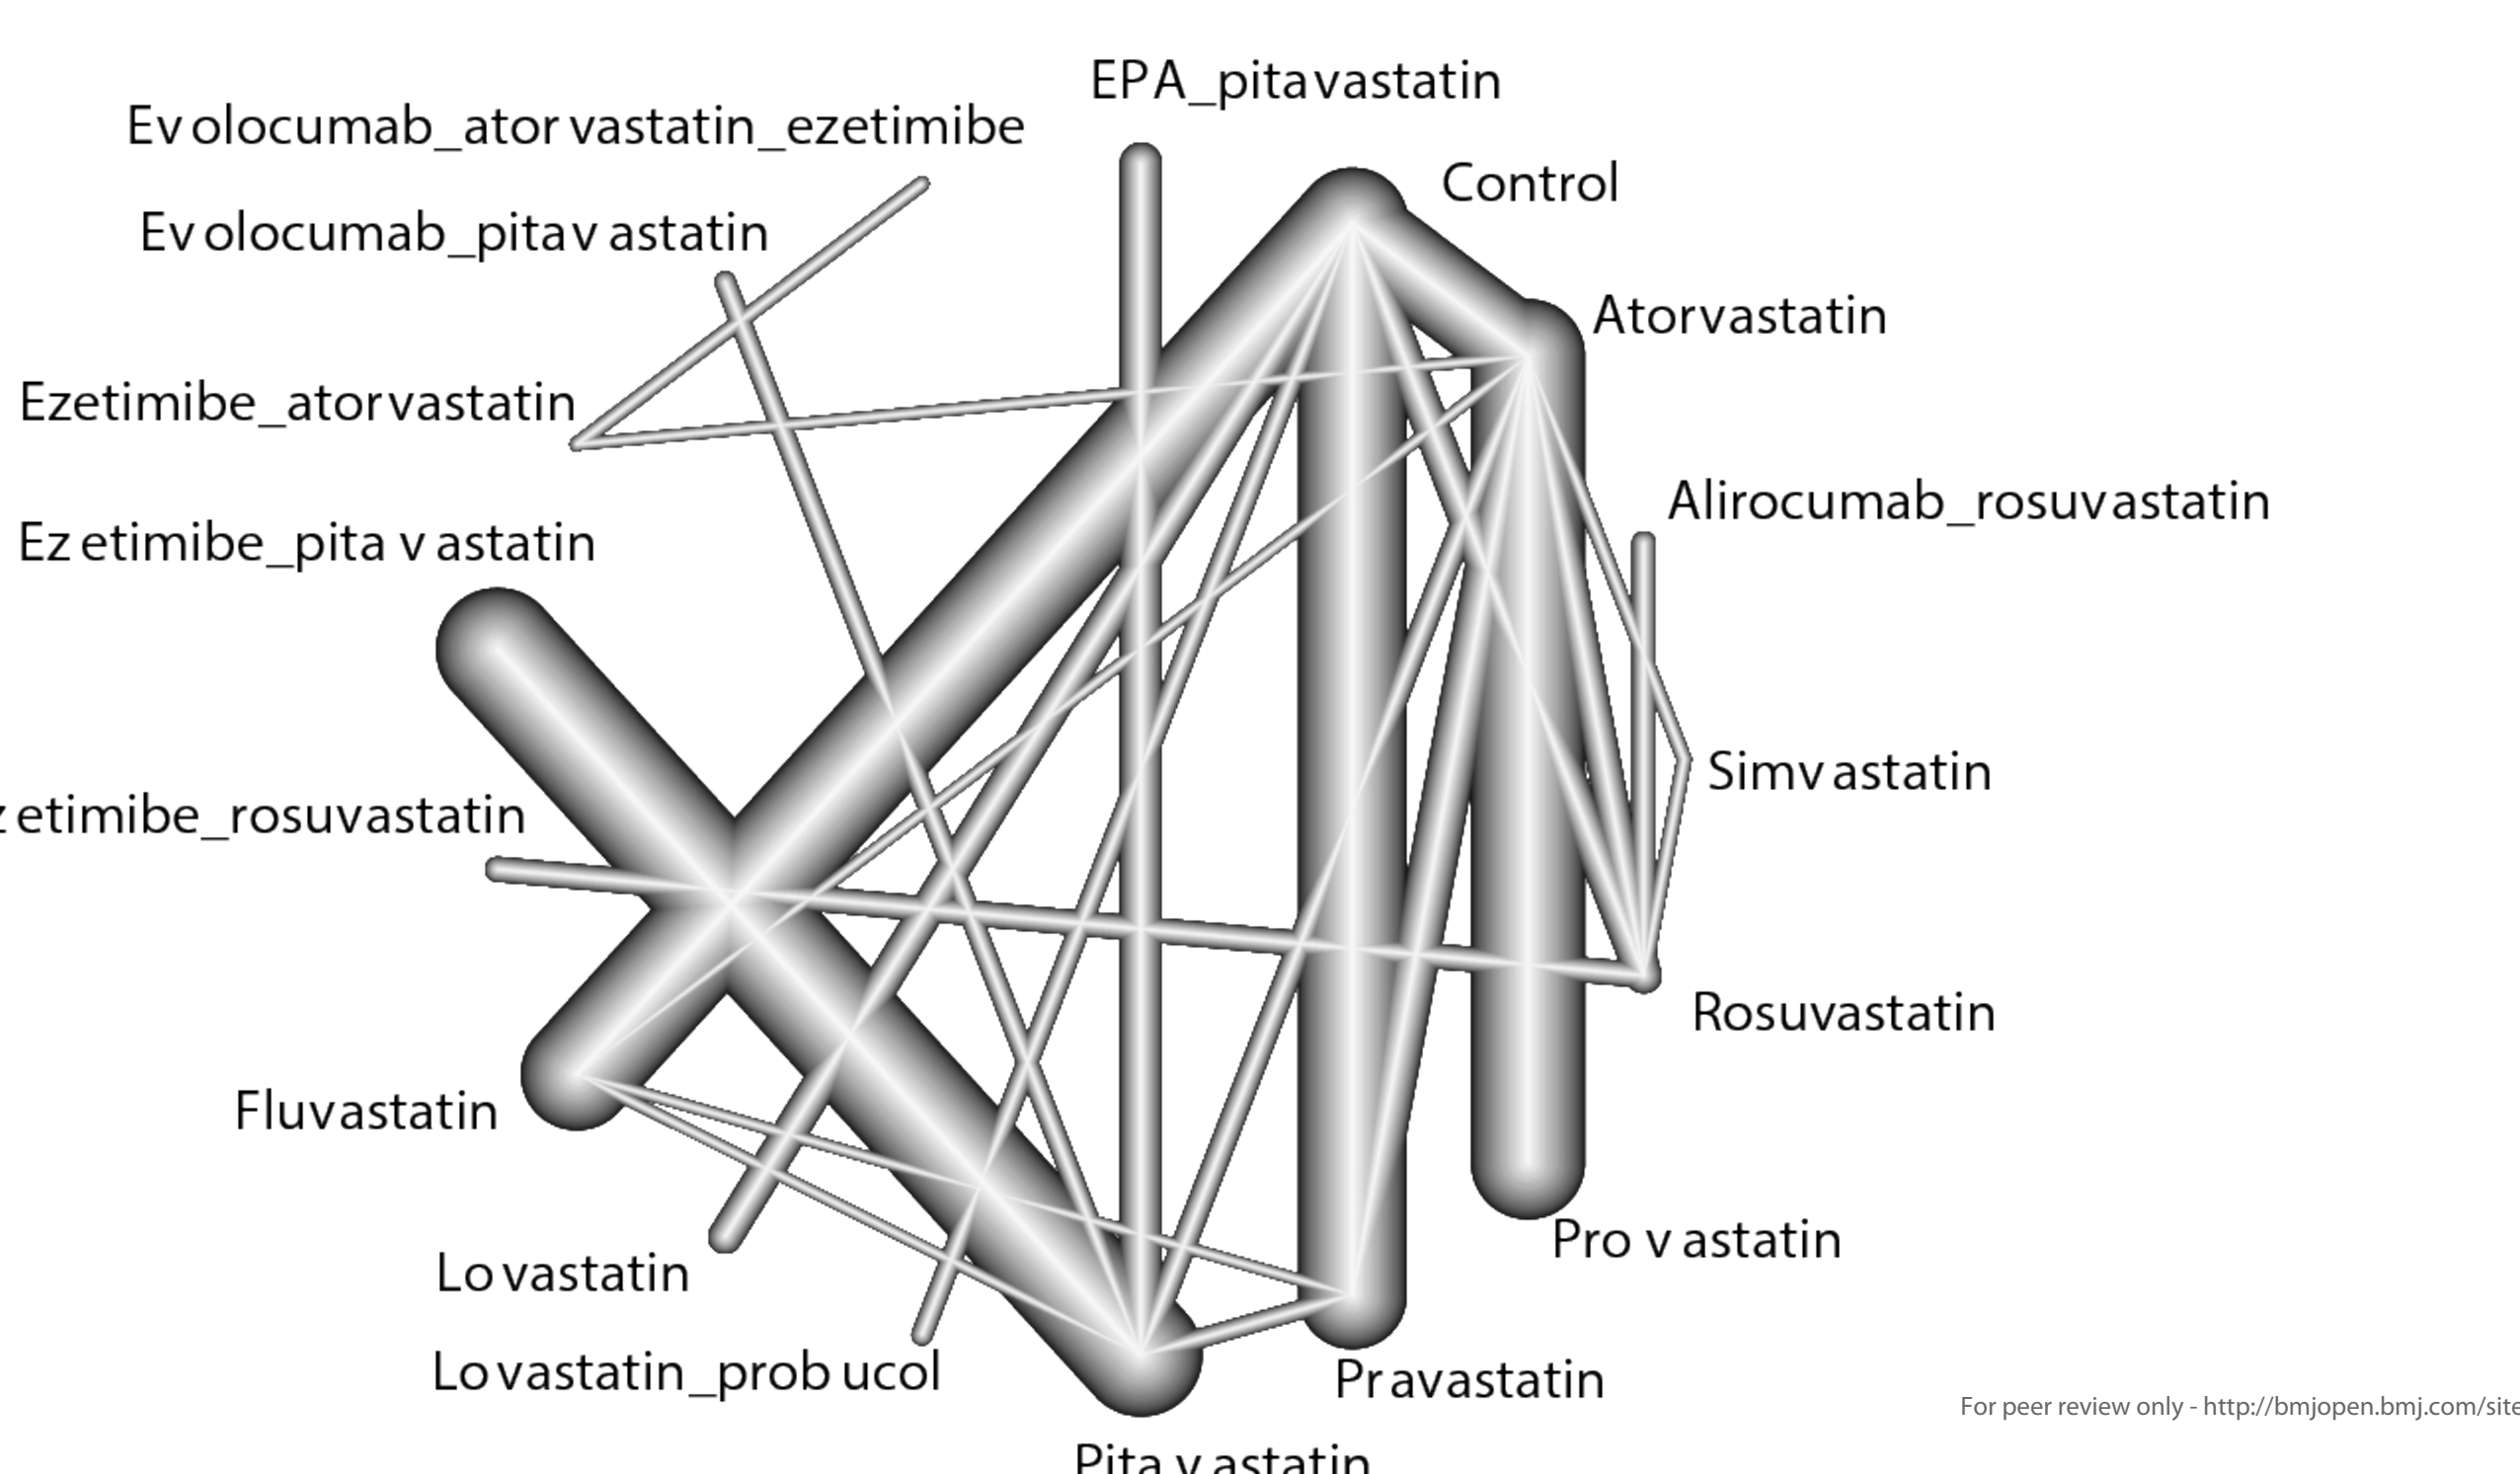

F

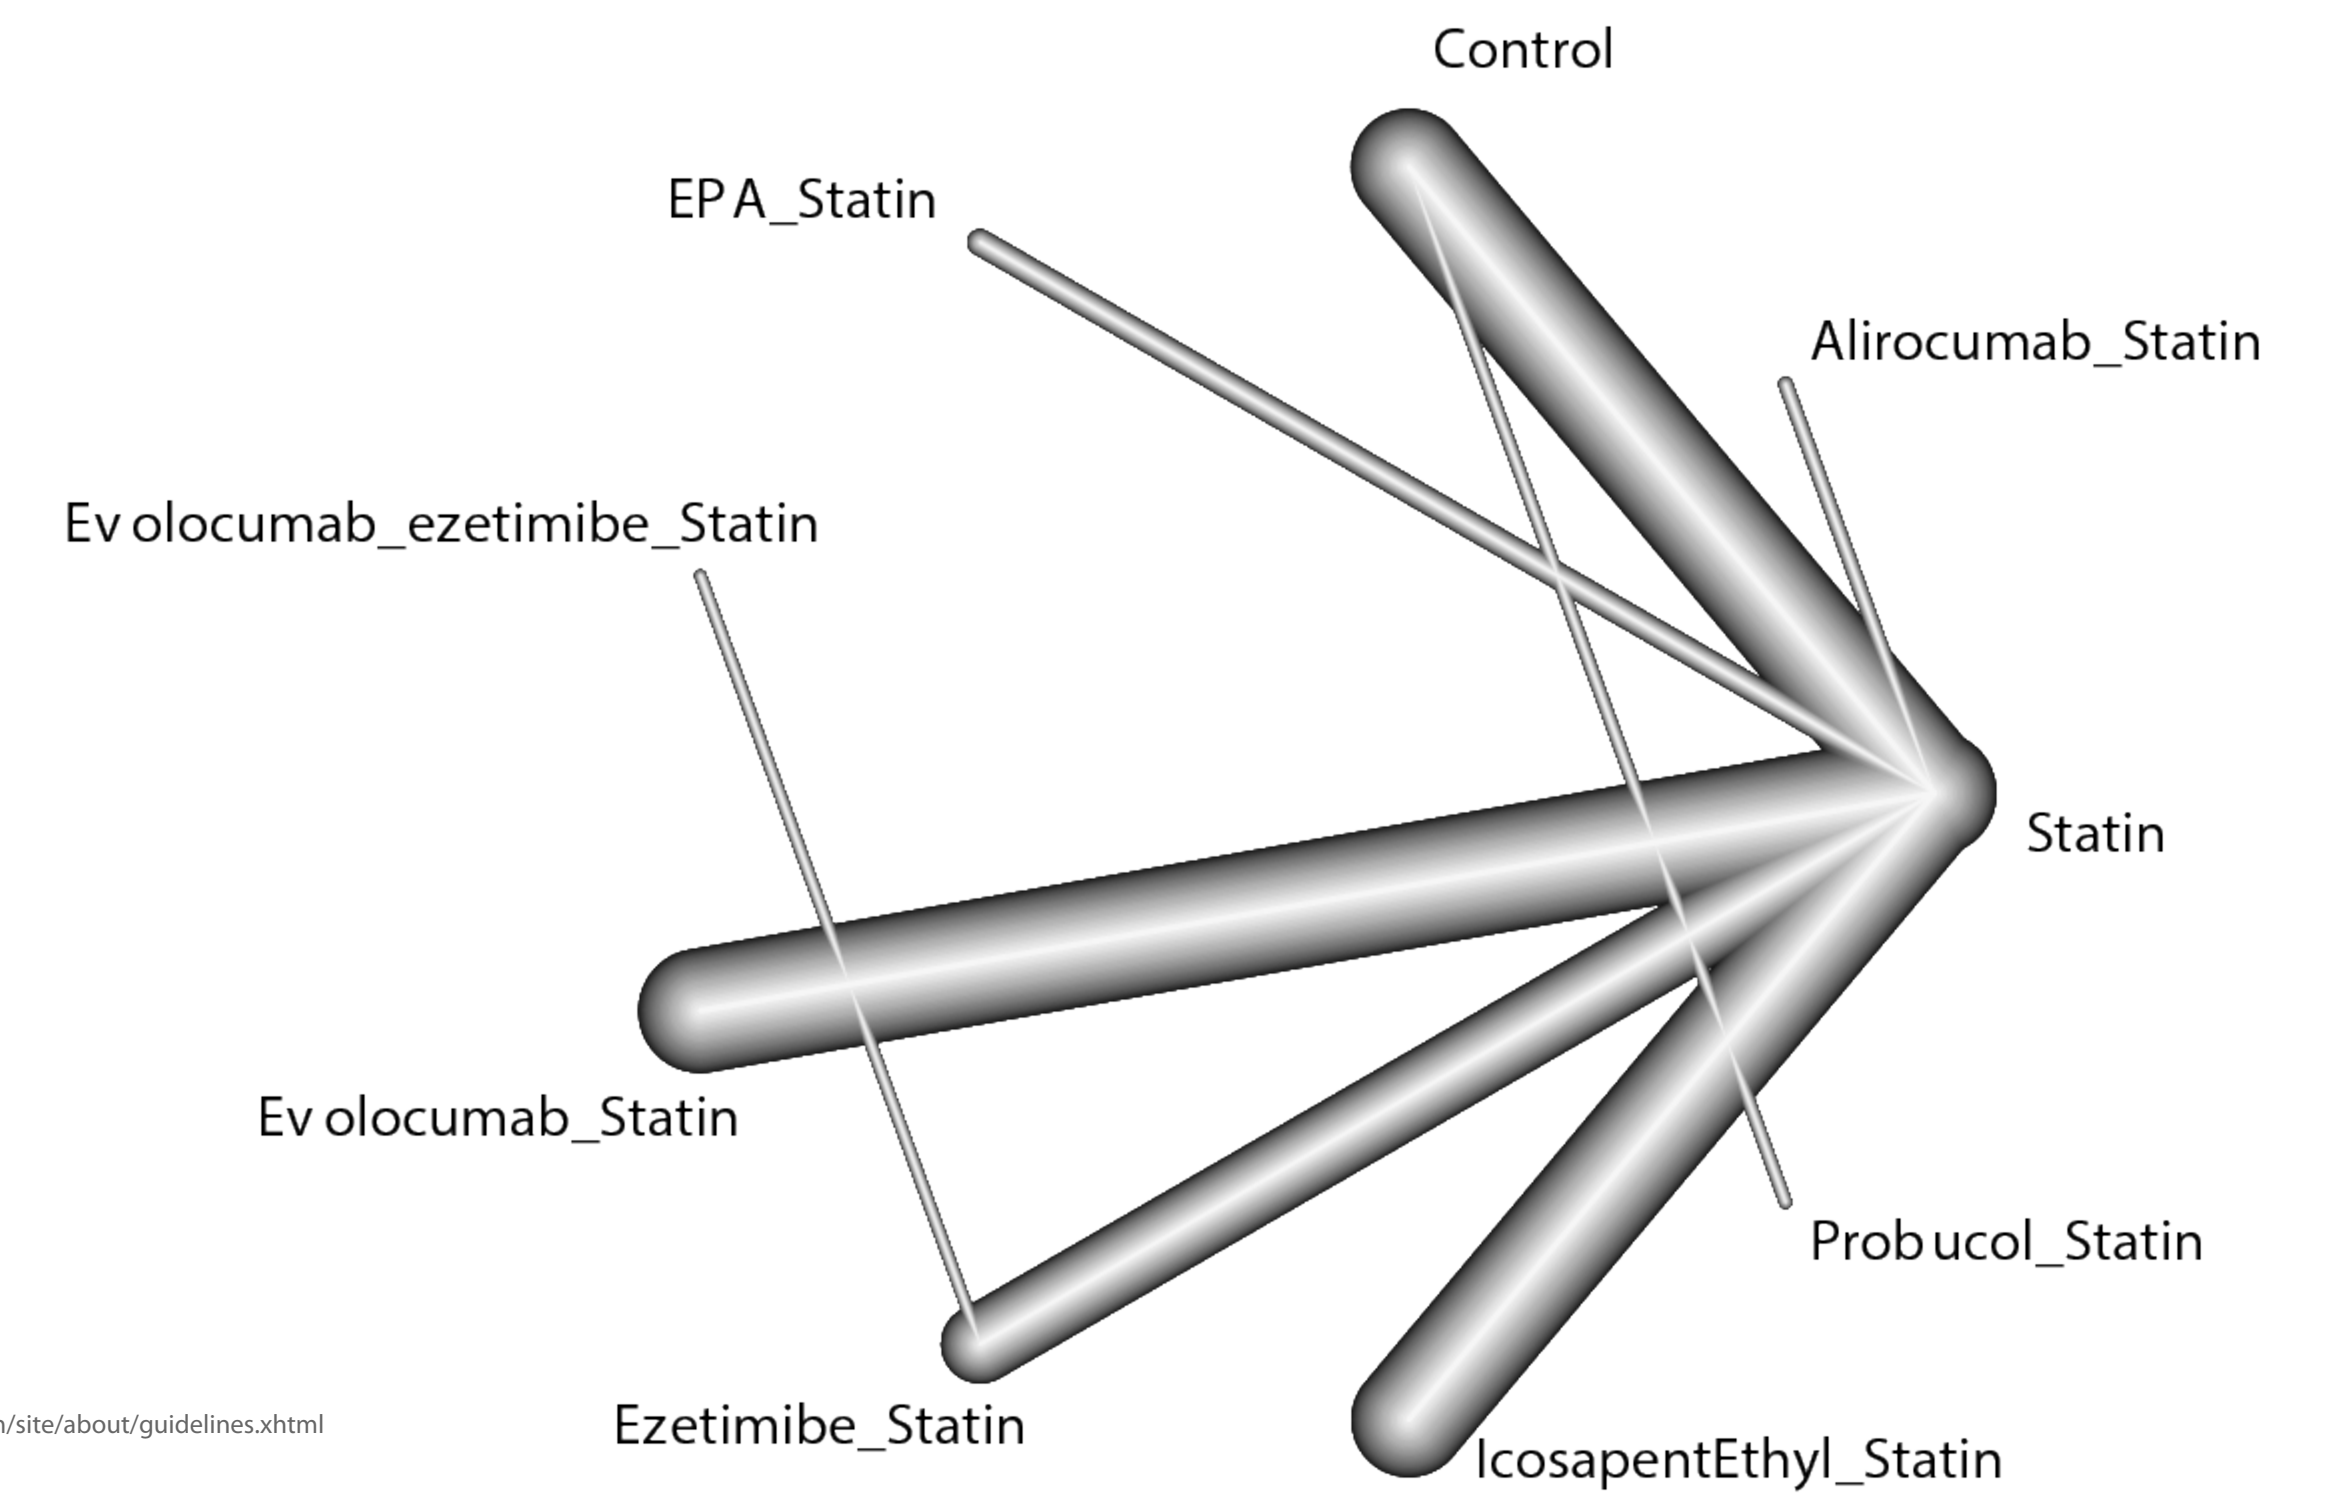

For peer review only

A

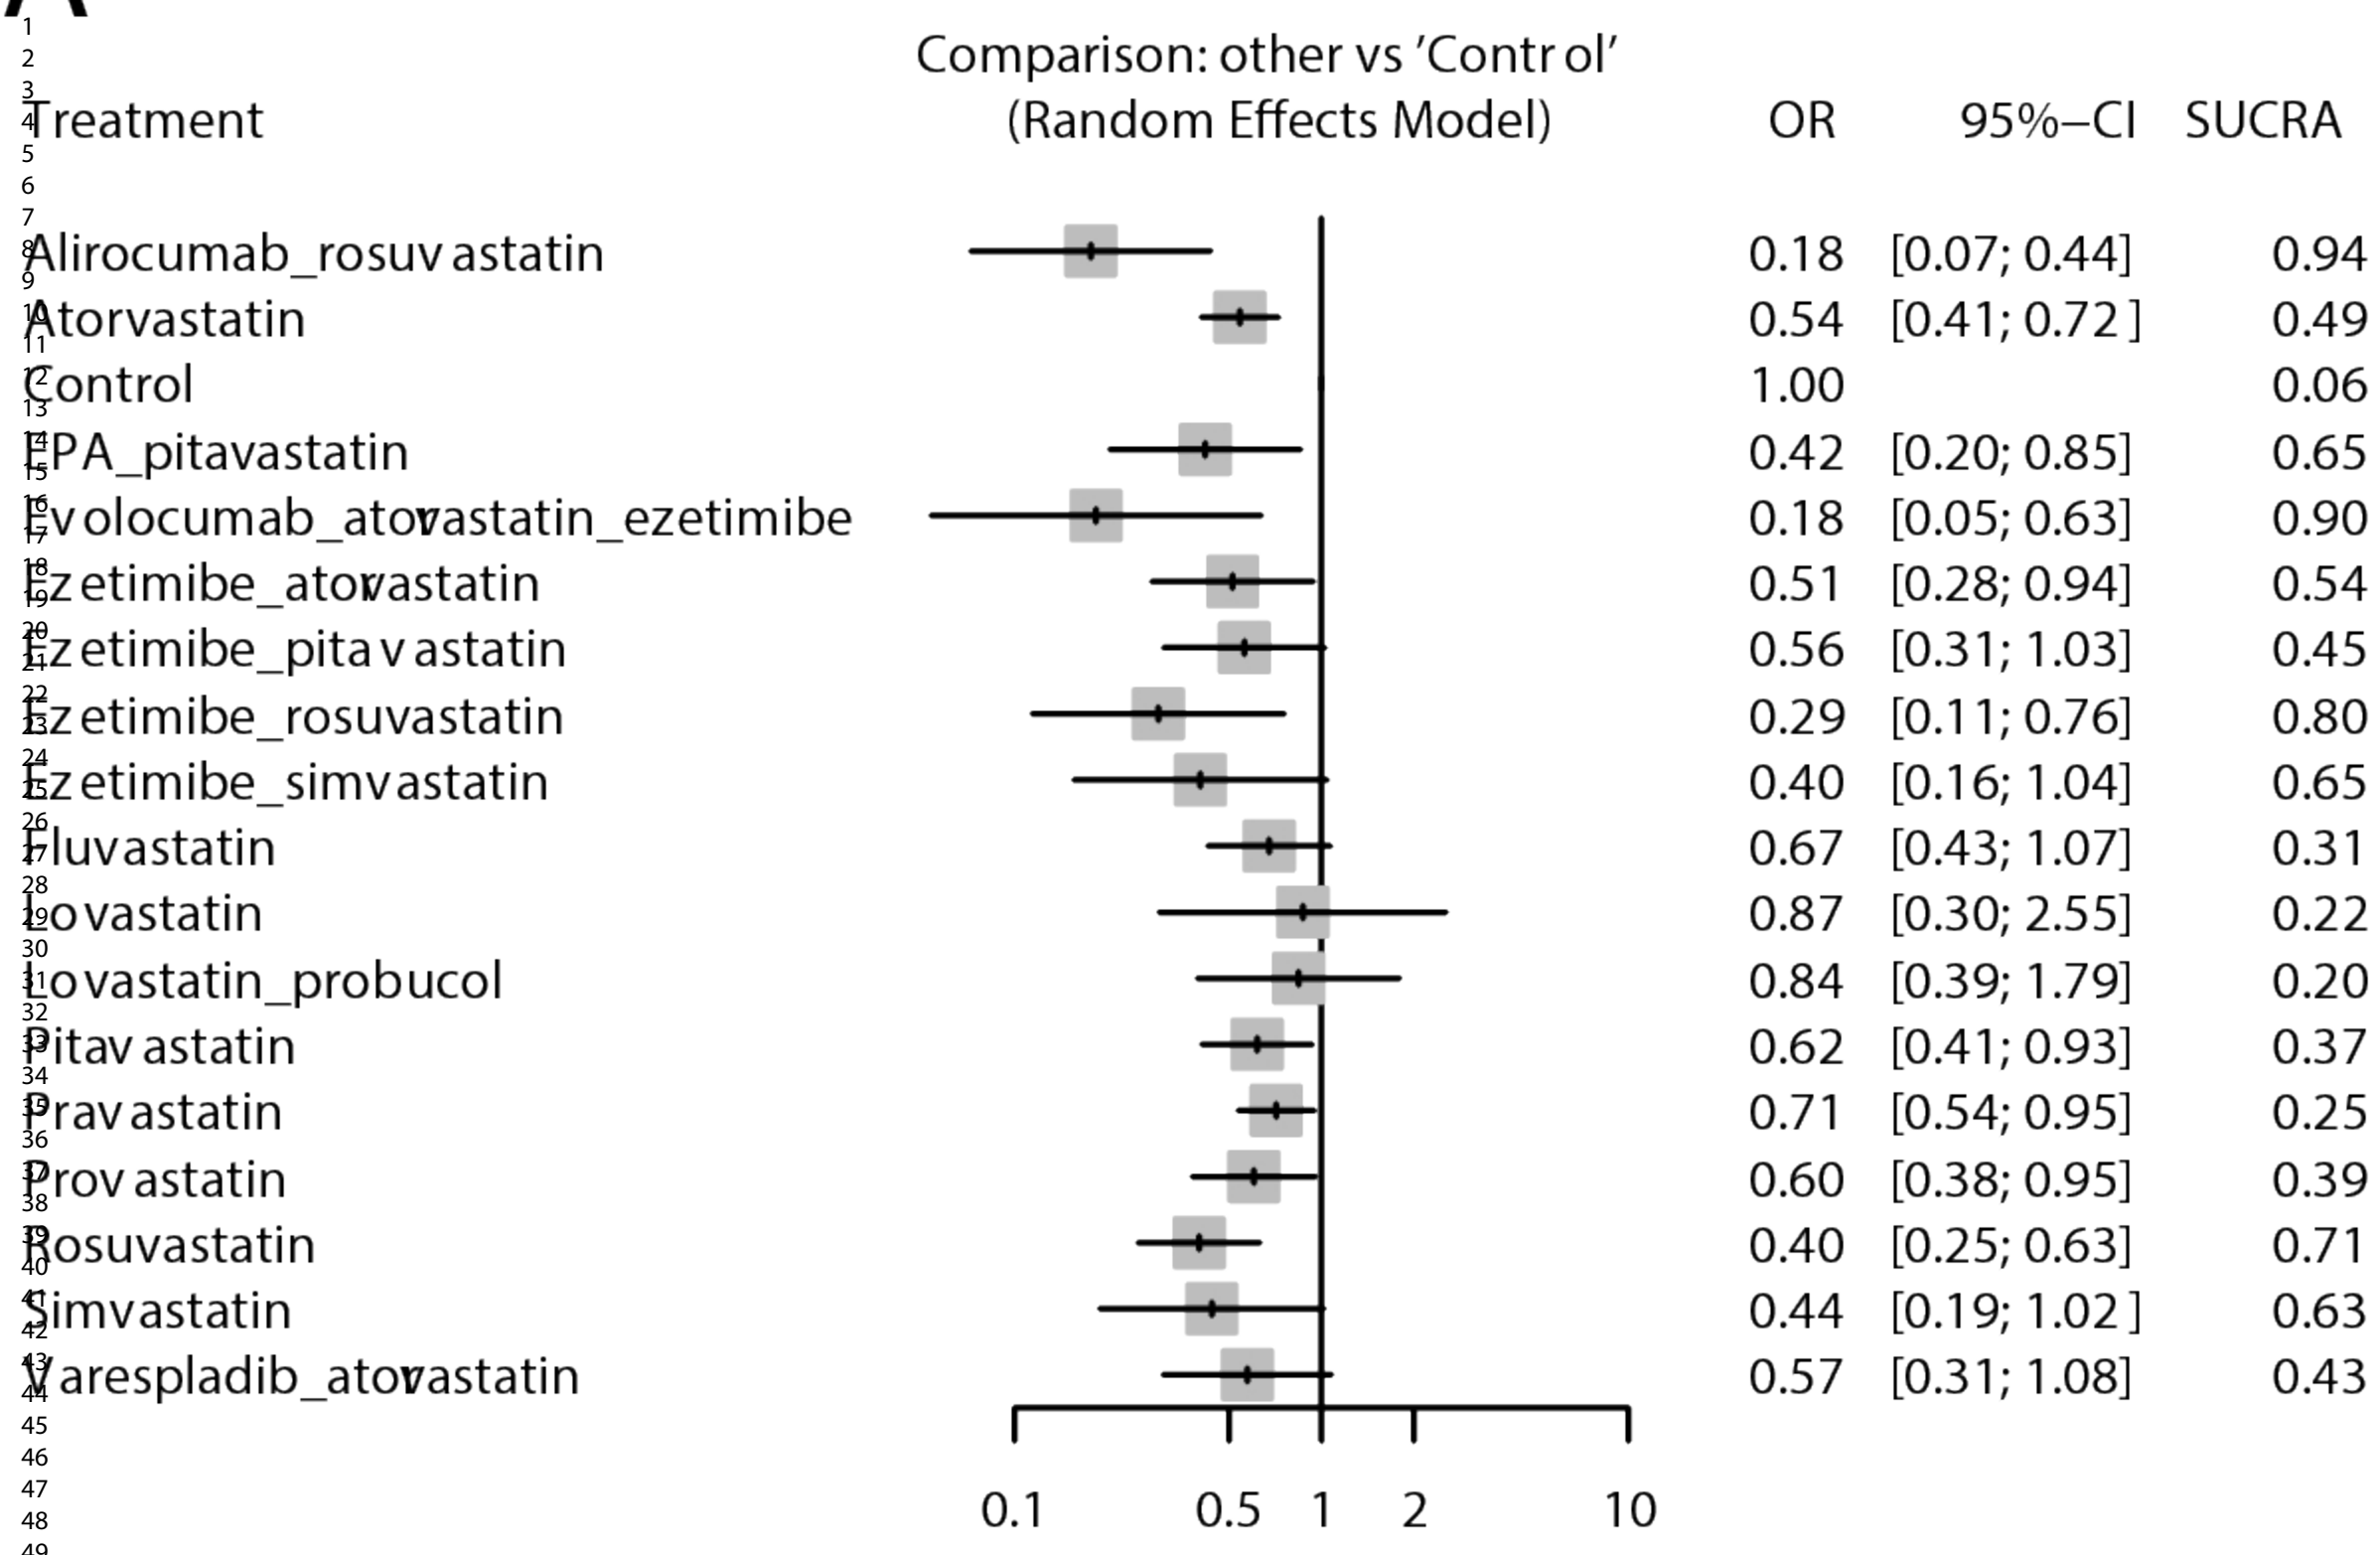

B

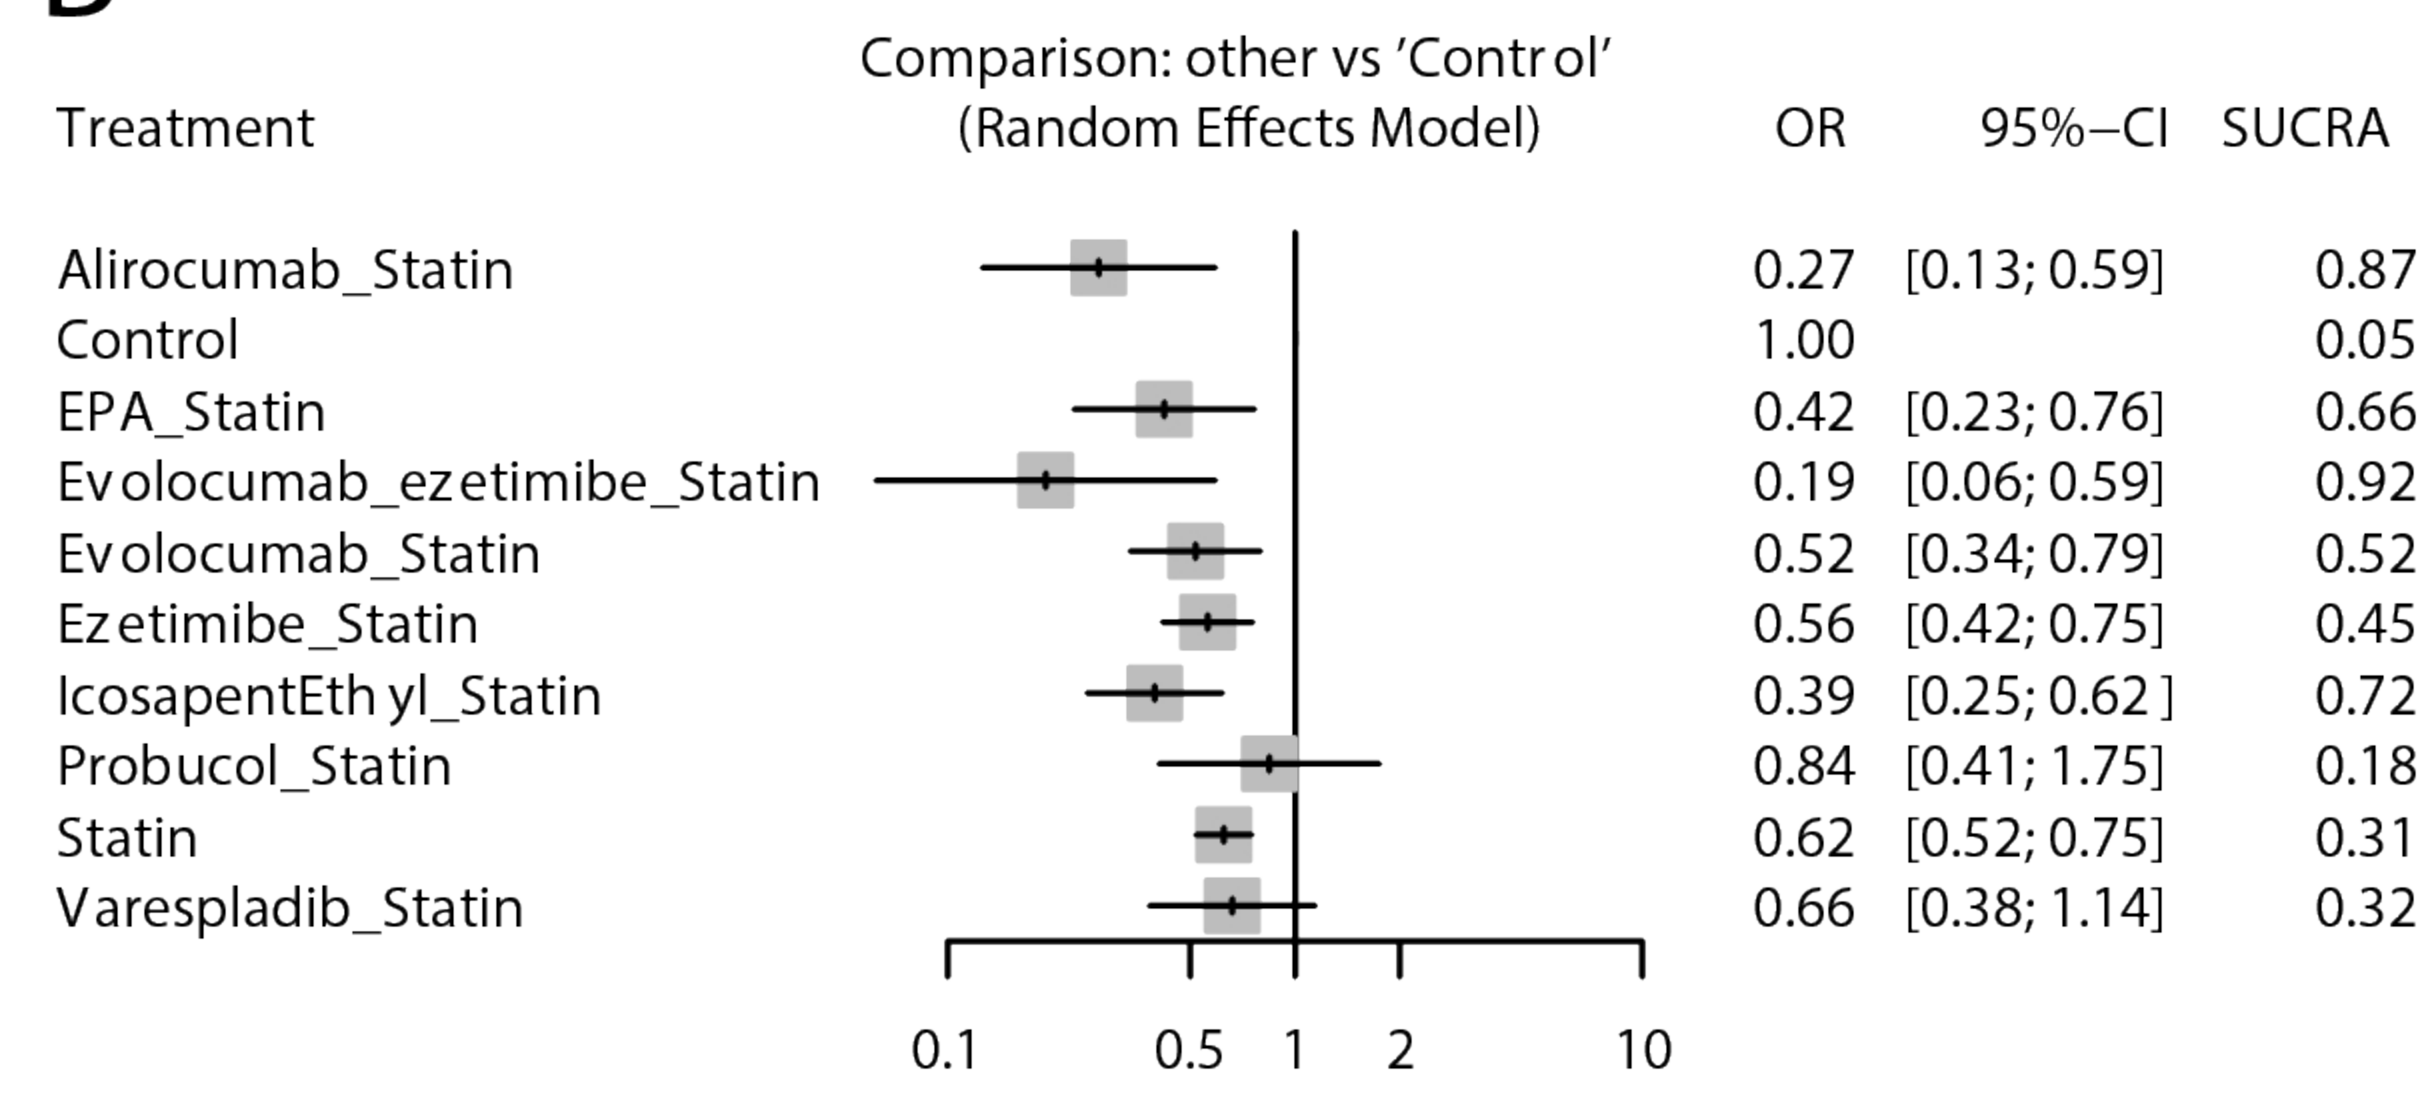

C

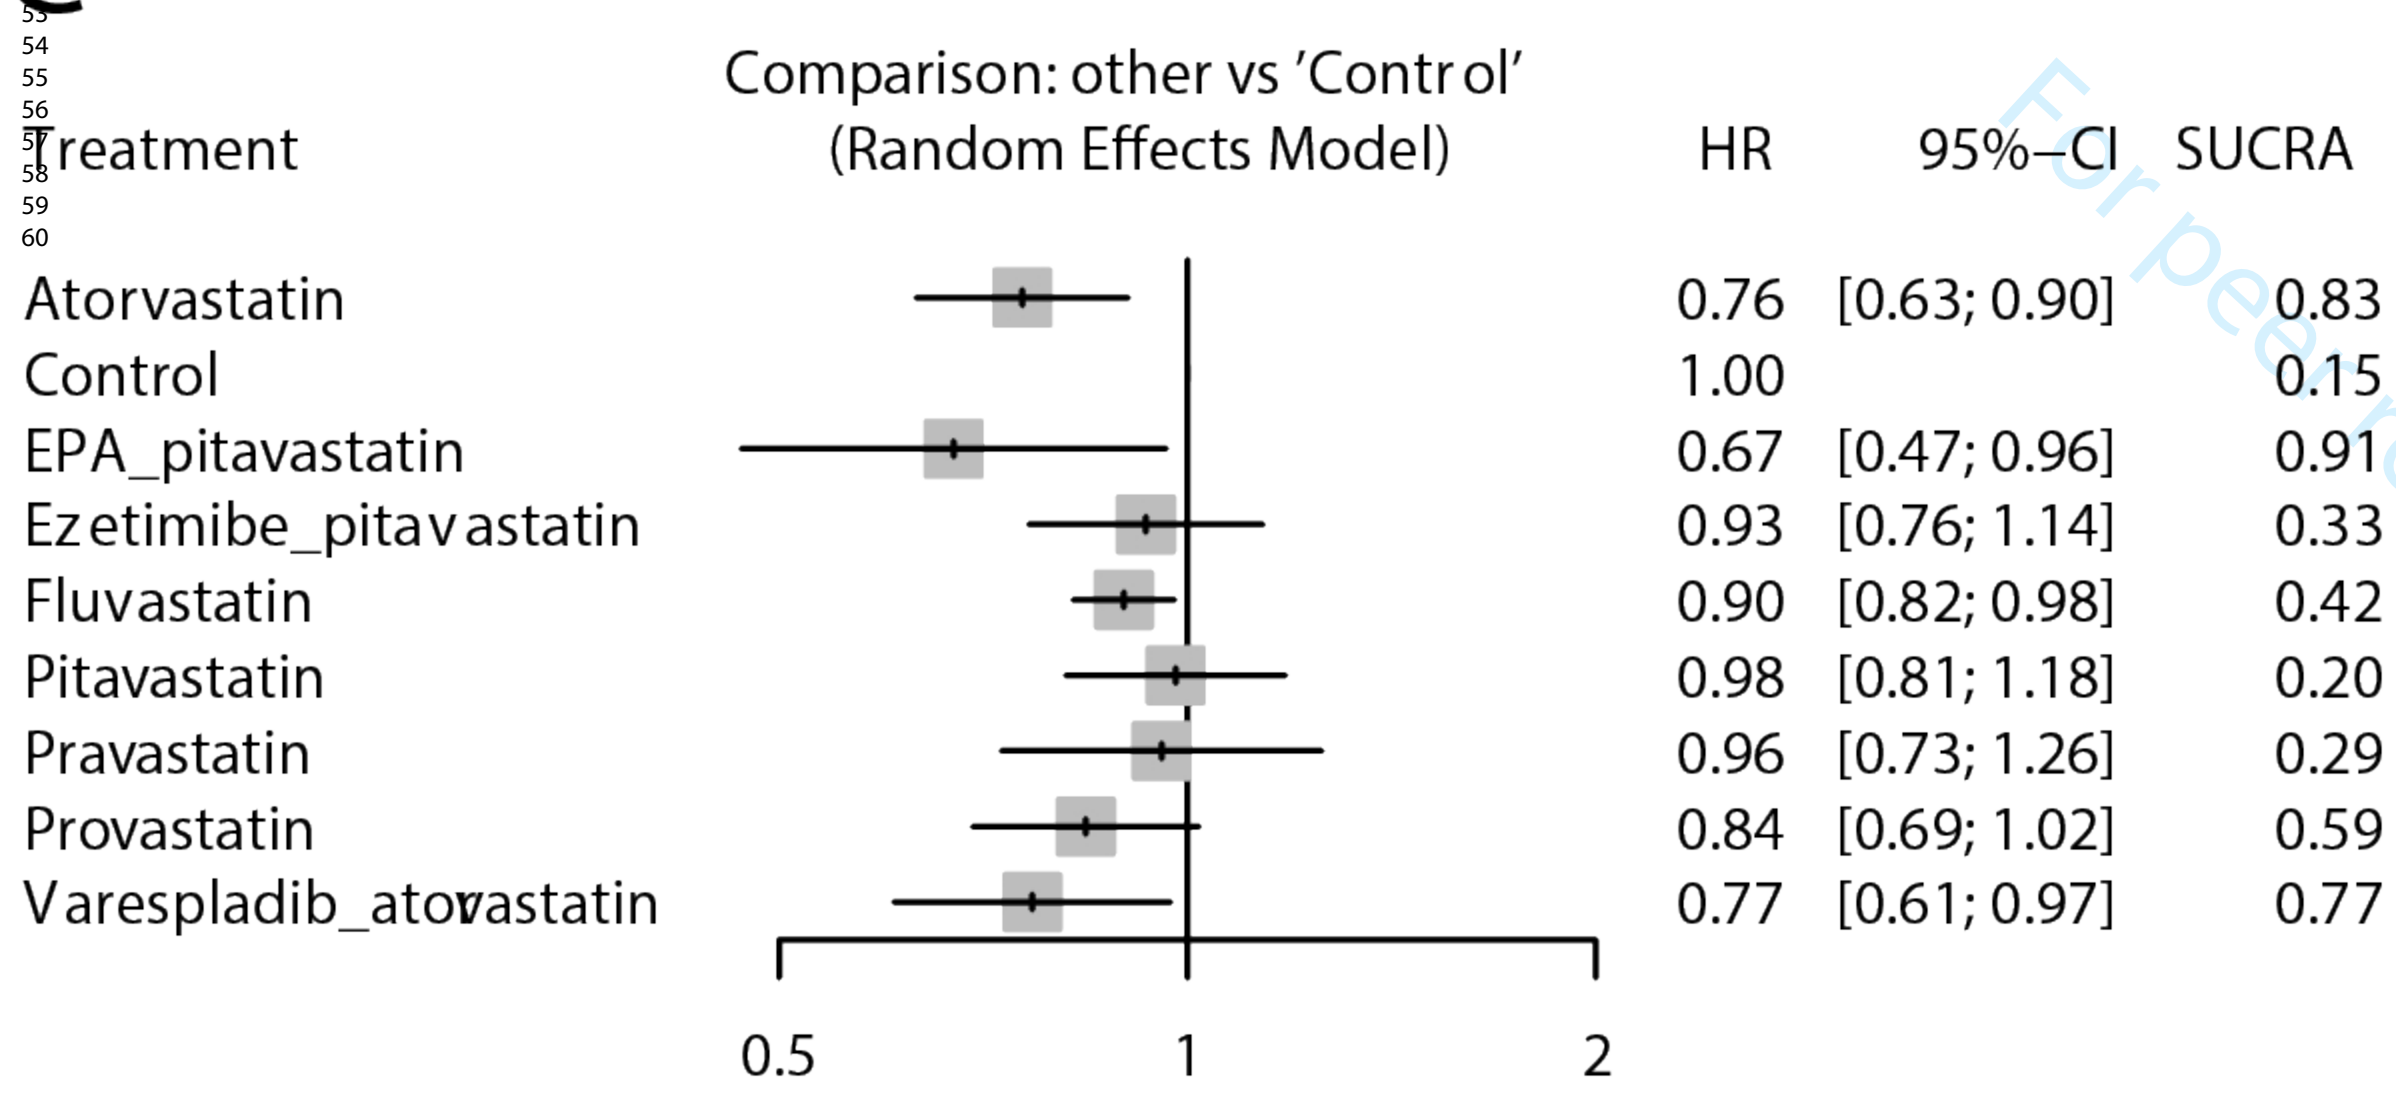

D

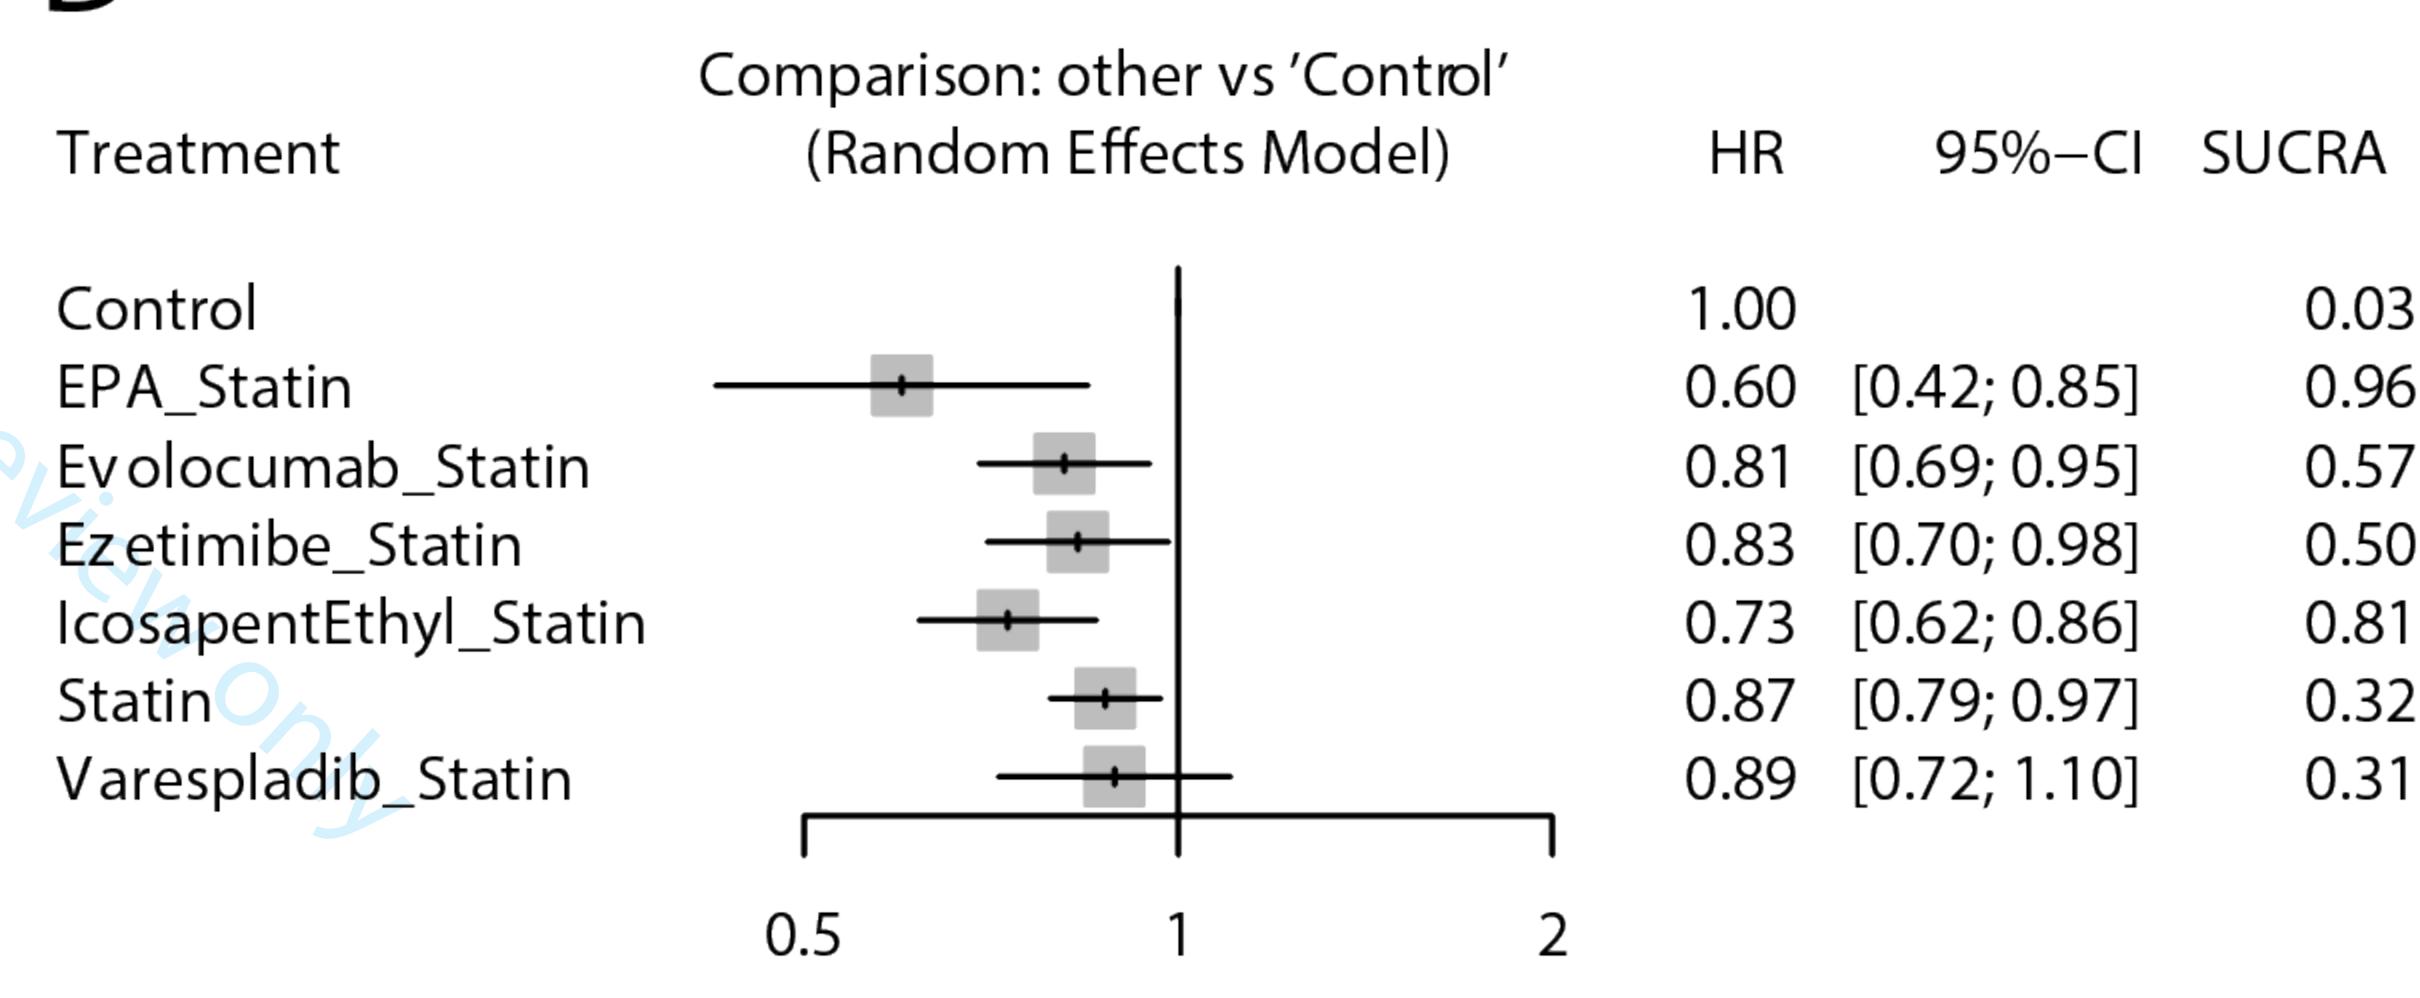

E

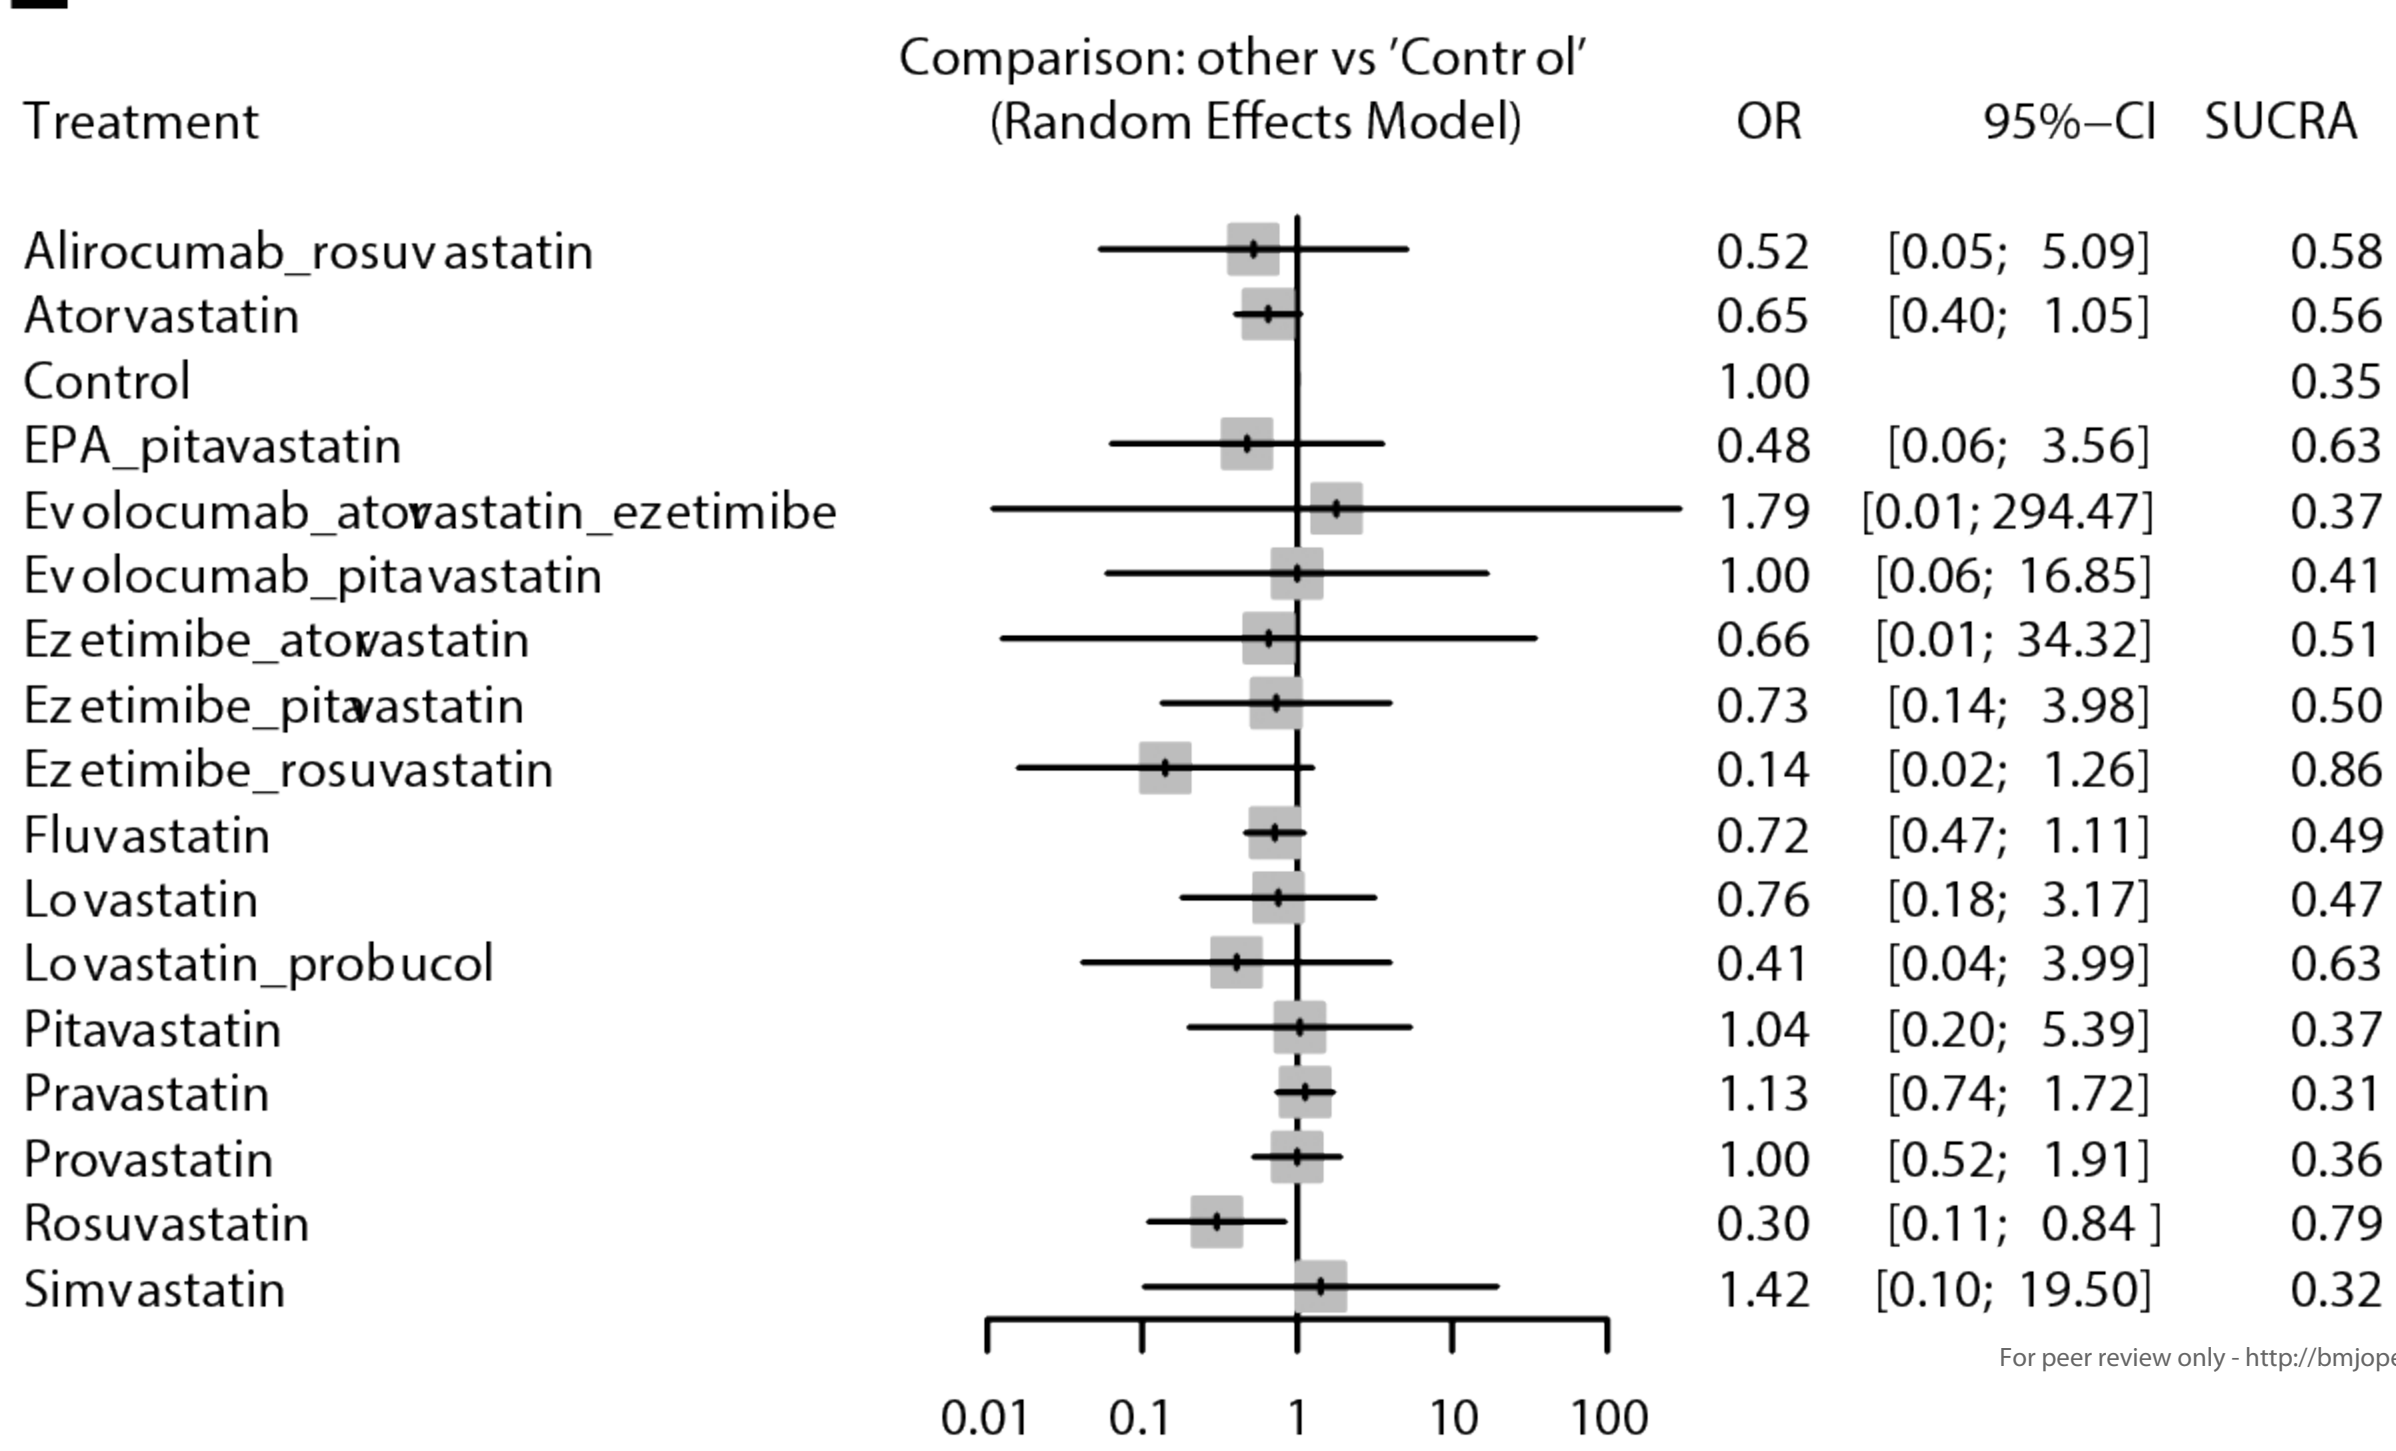

F

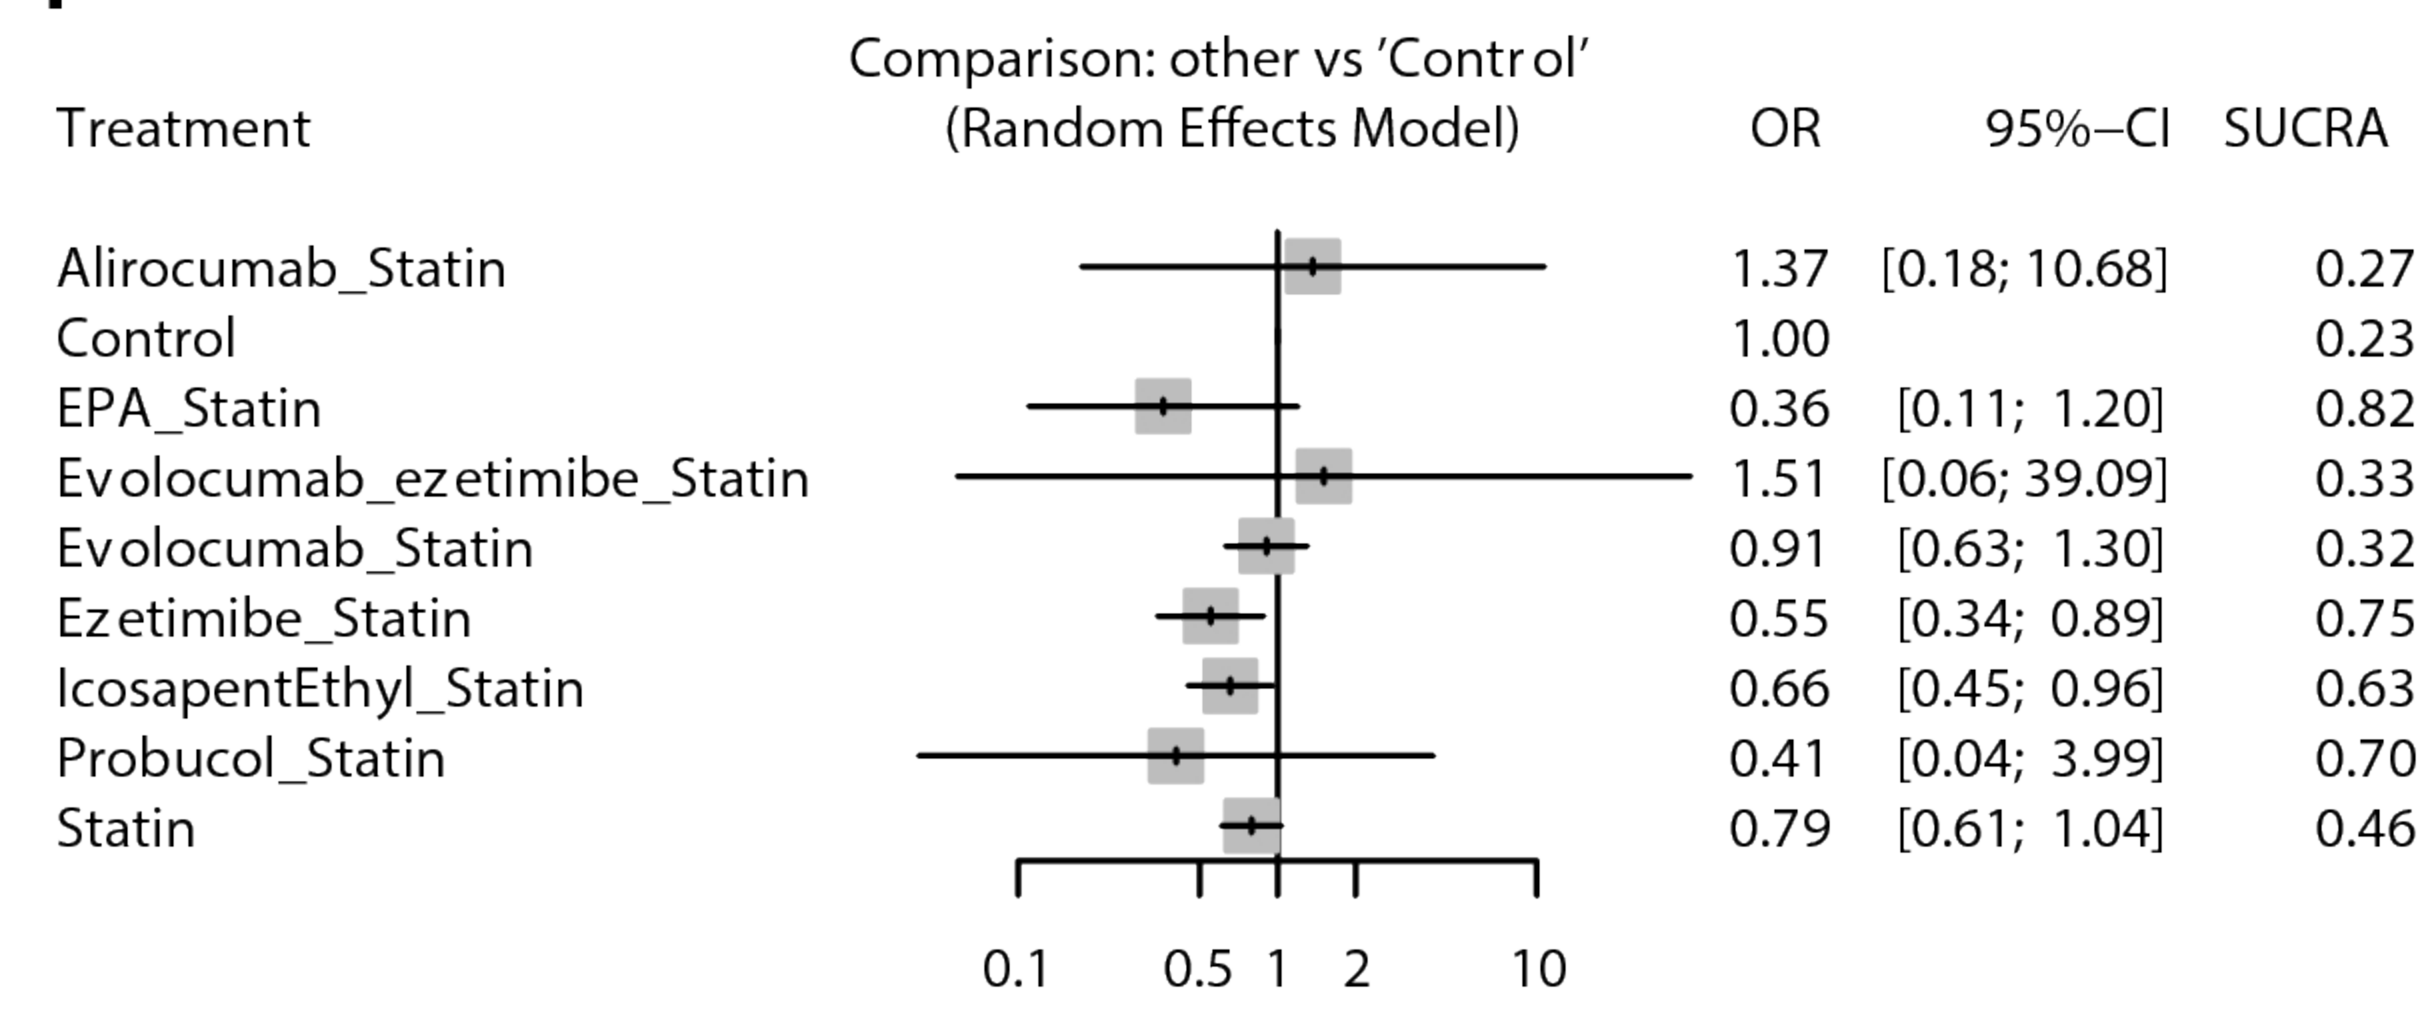

1  
2  
3  
4  
5  
6  
7  
8  
9  
10  
11  
12  
13  
14  
15  
16  
17  
18  
19  
20  
21  
22  
23  
24  
25  
26  
27  
28  
29  
30  
31  
32  
33  
34  
35  
36  
37  
38  
39  
40  
41  
42  
43  
44  
45  
46  
47  
48  
49  
50  
51  
52  
53  
54  
55  
56  
57  
58  
59  
60

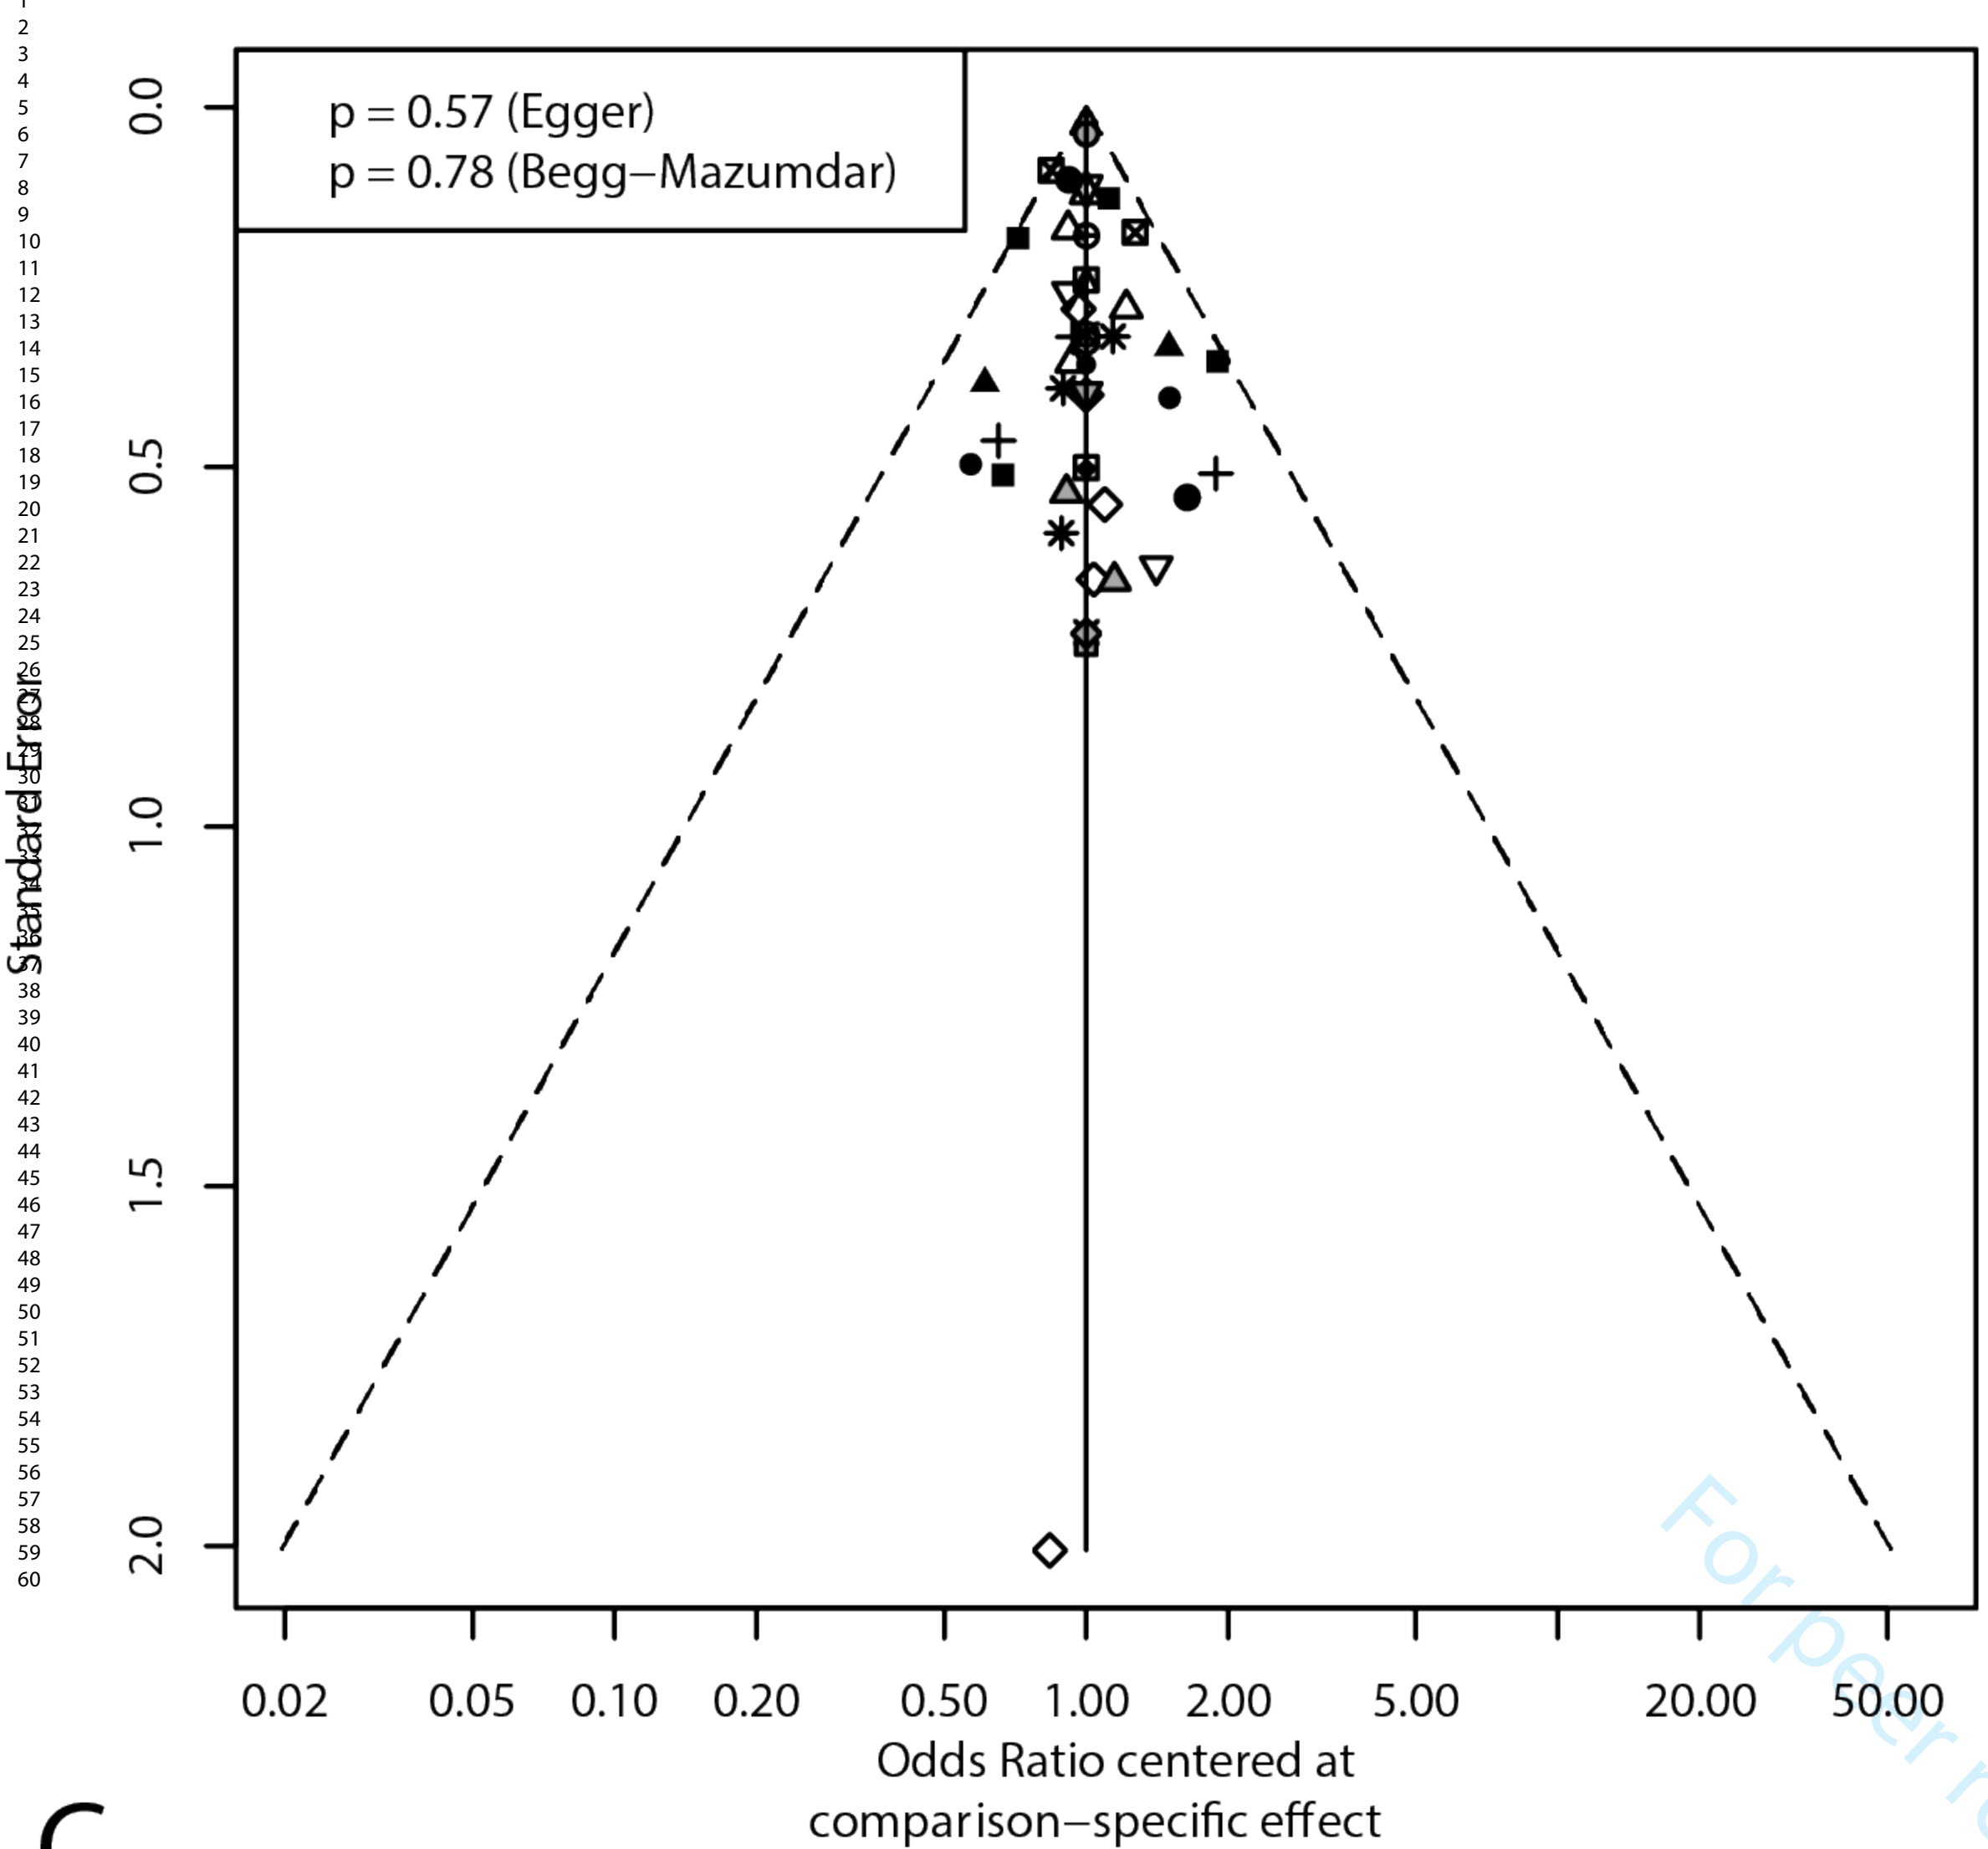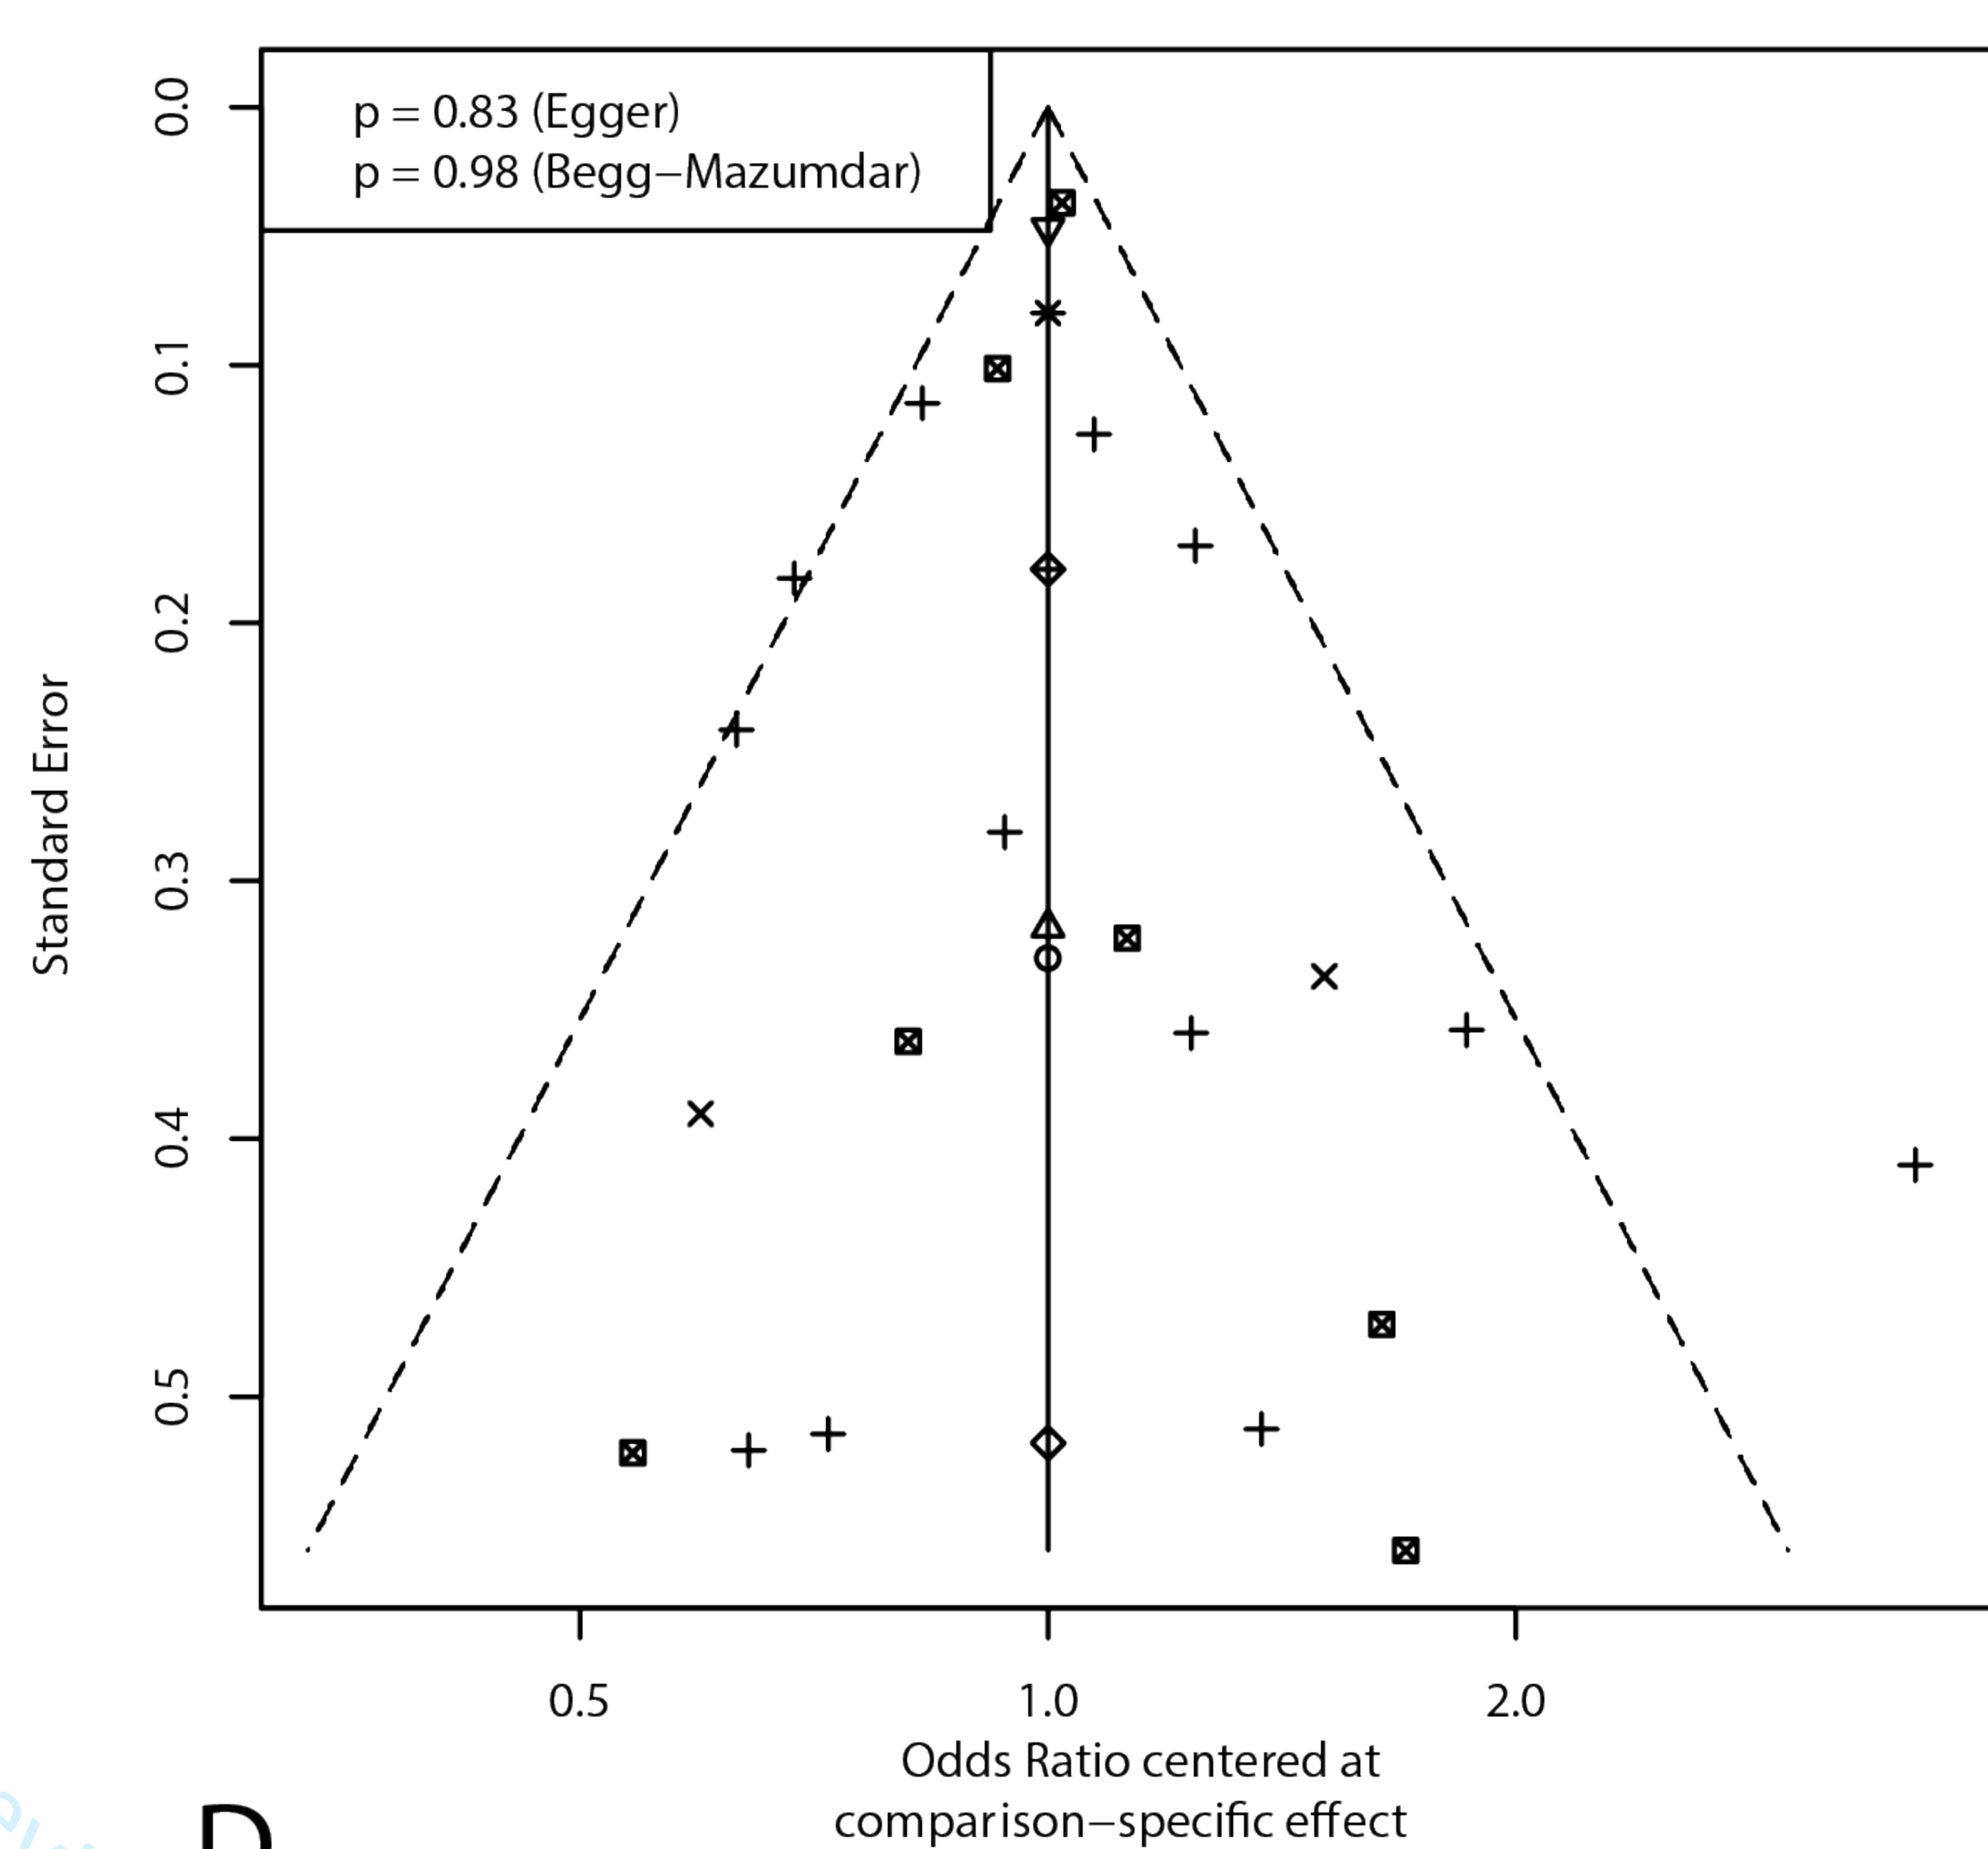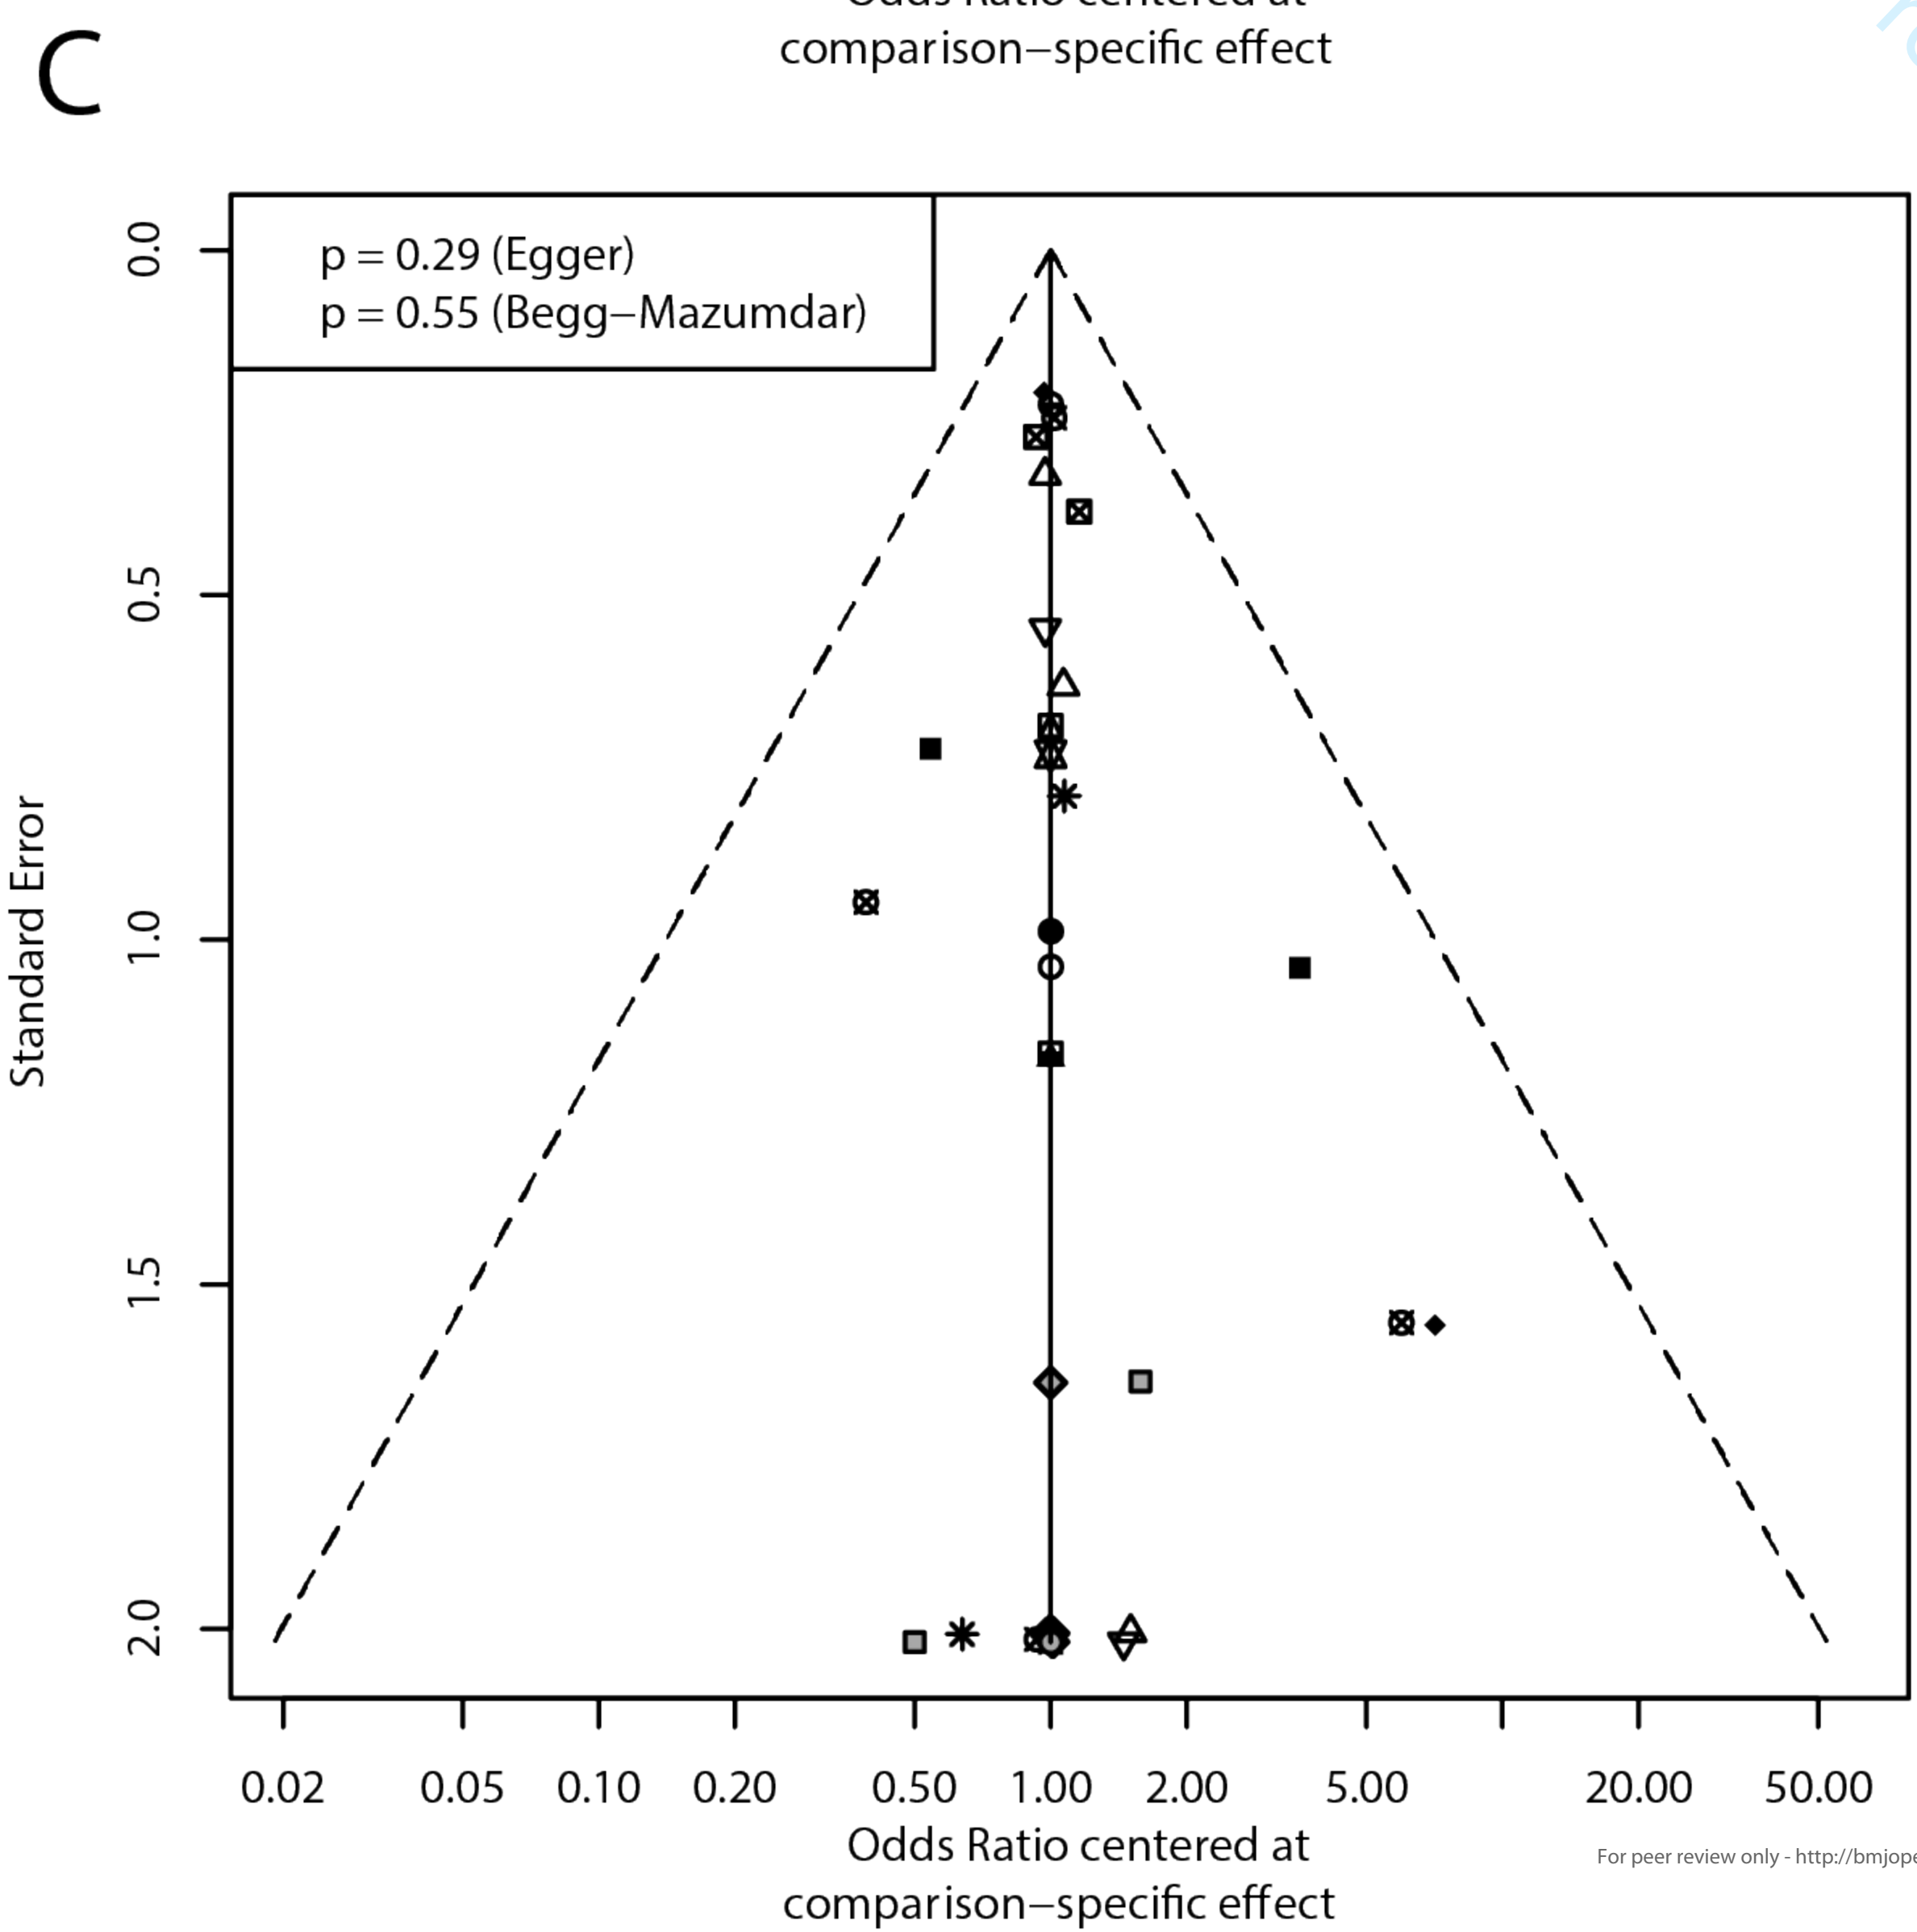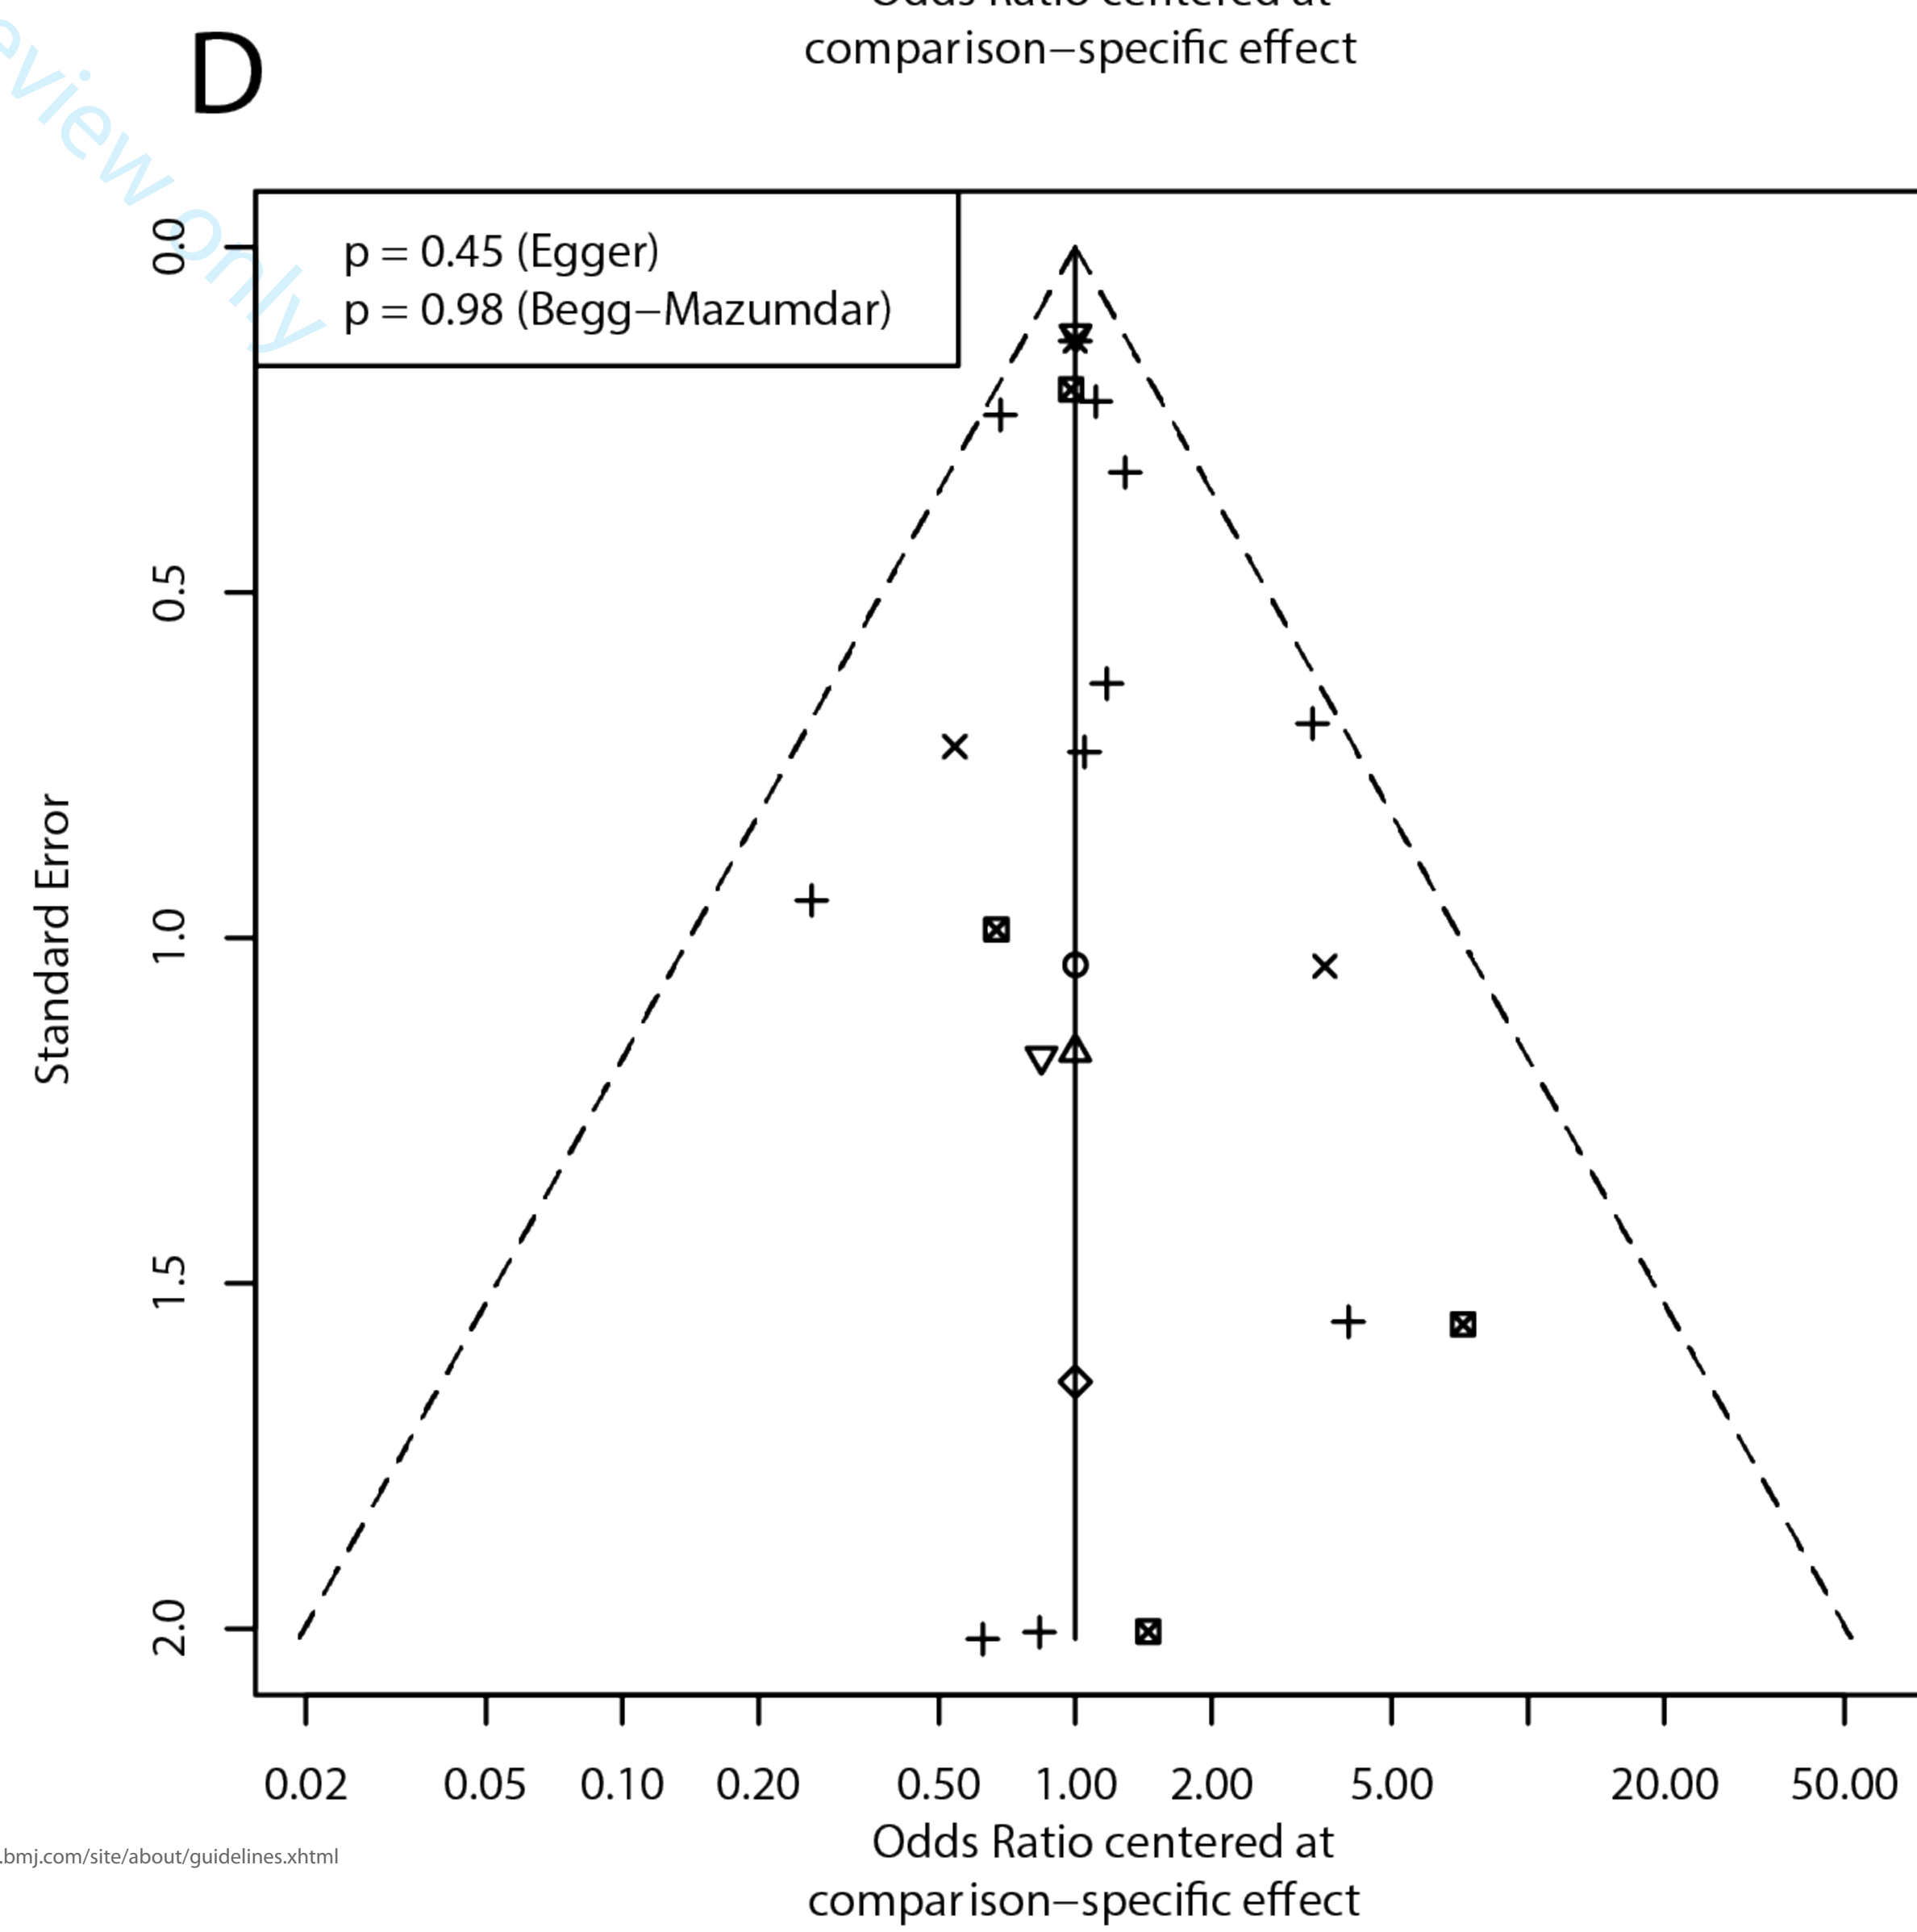

For peer review only - <http://bmjopen.bmj.com/site/about/guidelines.xhtml>



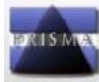

## PRISMA 2020 Checklist

| Section and Topic             | Item # | Checklist item                                                                                                                                                                                                                                                                                       | Location where item is reported |
|-------------------------------|--------|------------------------------------------------------------------------------------------------------------------------------------------------------------------------------------------------------------------------------------------------------------------------------------------------------|---------------------------------|
| <b>TITLE</b>                  |        |                                                                                                                                                                                                                                                                                                      |                                 |
| Title                         | 1      | Identify the report as a systematic review.                                                                                                                                                                                                                                                          | 1-4                             |
| <b>ABSTRACT</b>               |        |                                                                                                                                                                                                                                                                                                      |                                 |
| Abstract                      | 2      | See the PRISMA 2020 for Abstracts checklist.                                                                                                                                                                                                                                                         | 11-41                           |
| <b>INTRODUCTION</b>           |        |                                                                                                                                                                                                                                                                                                      |                                 |
| Rationale                     | 3      | Describe the rationale for the review in the context of existing knowledge.                                                                                                                                                                                                                          | 16-17                           |
| Objectives                    | 4      | Provide an explicit statement of the objective(s) or question(s) the review addresses.                                                                                                                                                                                                               | 20-23                           |
| <b>METHODS</b>                |        |                                                                                                                                                                                                                                                                                                      |                                 |
| Eligibility criteria          | 5      | Specify the inclusion and exclusion criteria for the review and how studies were grouped for the syntheses.                                                                                                                                                                                          | 24-31                           |
| Information sources           | 6      | Specify all databases, registers, websites, organisations, reference lists and other sources searched or consulted to identify studies. Specify the date when each source was last searched or consulted.                                                                                            | 19-22                           |
| Search strategy               | 7      | Present the full search strategies for all databases, registers and websites, including any filters and limits used.                                                                                                                                                                                 | Figure1                         |
| Selection process             | 8      | Specify the methods used to decide whether a study met the inclusion criteria of the review, including how many reviewers screened each record and each report retrieved, whether they worked independently, and if applicable, details of automation tools used in the process.                     | 68-76                           |
| Data collection process       | 9      | Specify the methods used to collect data from reports, including how many reviewers collected data from each report, whether they worked independently, any processes for obtaining or confirming data from study investigators, and if applicable, details of automation tools used in the process. | 75-76                           |
| Data items                    | 10a    | List and define all outcomes for which data were sought. Specify whether all results that were compatible with each outcome domain in each study were sought (e.g. for all measures, time points, analyses), and if not, the methods used to decide which results to collect.                        | 90-92                           |
|                               | 10b    | List and define all other variables for which data were sought (e.g. participant and intervention characteristics, funding sources). Describe any assumptions made about any missing or unclear information.                                                                                         | 94-98                           |
| Study risk of bias assessment | 11     | Specify the methods used to assess risk of bias in the included studies, including details of the tool(s) used, how many reviewers assessed each study and whether they worked independently, and if applicable, details of automation tools used in the process.                                    | 75-76                           |
| Effect measures               | 12     | Specify for each outcome the effect measure(s) (e.g. risk ratio, mean difference) used in the synthesis or presentation of results.                                                                                                                                                                  | 69-73                           |
| Synthesis methods             | 13a    | Describe the processes used to decide which studies were eligible for each synthesis (e.g. tabulating the study intervention characteristics and comparing against the planned groups for each synthesis (item #5)).                                                                                 | 80-82                           |
|                               | 13b    | Describe any methods required to prepare the data for presentation or synthesis, such as handling of missing summary statistics, or data conversions.                                                                                                                                                | 83-84                           |
|                               | 13c    | Describe any methods used to tabulate or visually display results of individual studies and syntheses.                                                                                                                                                                                               | 85-86                           |
|                               | 13d    | Describe any methods used to synthesize results and provide a rationale for the choice(s). If meta-analysis was performed, describe the model(s), method(s) to identify the presence and extent of statistical heterogeneity, and software package(s) used.                                          | 90-93                           |
|                               | 13e    | Describe any methods used to explore possible causes of heterogeneity among study results (e.g. subgroup analysis, meta-regression).                                                                                                                                                                 | 94-98                           |
|                               | 13f    | Describe any sensitivity analyses conducted to assess robustness of the synthesized results.                                                                                                                                                                                                         | 101-105                         |
| Reporting bias assessment     | 14     | Describe any methods used to assess risk of bias due to missing results in a synthesis (arising from reporting biases).                                                                                                                                                                              | 105-108                         |
| Certainty assessment          | 15     | Describe any methods used to assess certainty (or confidence) in the body of evidence for an outcome.                                                                                                                                                                                                | 107-108                         |

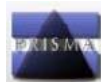

## PRISMA 2020 Checklist

| Section and Topic                              | Item # | Checklist item                                                                                                                                                                                                                                                                       | Location where item is reported |
|------------------------------------------------|--------|--------------------------------------------------------------------------------------------------------------------------------------------------------------------------------------------------------------------------------------------------------------------------------------|---------------------------------|
| <b>RESULTS</b>                                 |        |                                                                                                                                                                                                                                                                                      |                                 |
| Study selection                                | 16a    | Describe the results of the search and selection process, from the number of records identified in the search to the number of studies included in the review, ideally using a flow diagram.                                                                                         | 111-113                         |
|                                                | 16b    | Cite studies that might appear to meet the inclusion criteria, but which were excluded, and explain why they were excluded.                                                                                                                                                          | 114-116                         |
| Study characteristics                          | 17     | Cite each included study and present its characteristics.                                                                                                                                                                                                                            | 118-121                         |
| Risk of bias in studies                        | 18     | Present assessments of risk of bias for each included study.                                                                                                                                                                                                                         | 126-130                         |
| Results of individual studies                  | 19     | For all outcomes, present, for each study: (a) summary statistics for each group (where appropriate) and (b) an effect estimate and its precision (e.g. confidence/credible interval), ideally using structured tables or plots.                                                     | 131-135                         |
| Results of syntheses                           | 20a    | For each synthesis, briefly summarise the characteristics and risk of bias among contributing studies.                                                                                                                                                                               | 118-126                         |
|                                                | 20b    | Present results of all statistical syntheses conducted. If meta-analysis was done, present for each the summary estimate and its precision (e.g. confidence/credible interval) and measures of statistical heterogeneity. If comparing groups, describe the direction of the effect. | 126-130                         |
|                                                | 20c    | Present results of all investigations of possible causes of heterogeneity among study results.                                                                                                                                                                                       | 131-135                         |
|                                                | 20d    | Present results of all sensitivity analyses conducted to assess the robustness of the synthesized results.                                                                                                                                                                           | 137-141                         |
| Reporting biases                               | 21     | Present assessments of risk of bias due to missing results (arising from reporting biases) for each synthesis assessed.                                                                                                                                                              | 143-149                         |
| Certainty of evidence                          | 22     | Present assessments of certainty (or confidence) in the body of evidence for each outcome assessed.                                                                                                                                                                                  | 151-153                         |
| <b>DISCUSSION</b>                              |        |                                                                                                                                                                                                                                                                                      |                                 |
| Discussion                                     | 23a    | Provide a general interpretation of the results in the context of other evidence.                                                                                                                                                                                                    | 169-174                         |
|                                                | 23b    | Discuss any limitations of the evidence included in the review.                                                                                                                                                                                                                      | 176-179                         |
|                                                | 23c    | Discuss any limitations of the review processes used.                                                                                                                                                                                                                                | 181-184                         |
|                                                | 23d    | Discuss implications of the results for practice, policy, and future research.                                                                                                                                                                                                       | 186-192                         |
| <b>OTHER INFORMATION</b>                       |        |                                                                                                                                                                                                                                                                                      |                                 |
| Registration and protocol                      | 24a    | Provide registration information for the review, including register name and registration number, or state that the review was not registered.                                                                                                                                       | 241-247                         |
|                                                | 24b    | Indicate where the review protocol can be accessed, or state that a protocol was not prepared.                                                                                                                                                                                       | 241-247                         |
|                                                | 24c    | Describe and explain any amendments to information provided at registration or in the protocol.                                                                                                                                                                                      | 241-247                         |
| Support                                        | 25     | Describe sources of financial or non-financial support for the review, and the role of the funders or sponsors in the review.                                                                                                                                                        | 236                             |
| Competing interests                            | 26     | Declare any competing interests of review authors.                                                                                                                                                                                                                                   | 250                             |
| Availability of data, code and other materials | 27     | Report which of the following are publicly available and where they can be found: template data collection forms; data extracted from included studies; data used for all analyses; analytic code; any other materials used in the review.                                           | 239                             |

From: Page MJ, McKenzie JE, Bossuyt PM, Boutron I, Hoffmann TC, Mulrow CD, et al. The PRISMA 2020 statement: an updated guideline for reporting systematic reviews. *BMJ* 2021;372:n71. doi: 10.1136/bmj.n71

For peer review only. [http://bmjopen.bmj.com/site/author\\_guidelines.xhtml](http://bmjopen.bmj.com/site/author_guidelines.xhtml)

# BMJ Open

## Effectiveness of lipid-lowering therapy on mortality and major adverse cardiovascular event outcomes in patients undergoing percutaneous coronary intervention: a network meta-analysis of randomized controlled trials

|                                 |                                                                                                                                                                                                                                                                                                                                                                                                                                                                                                                                                                                                                                                                                                                                                                                                                                            |
|---------------------------------|--------------------------------------------------------------------------------------------------------------------------------------------------------------------------------------------------------------------------------------------------------------------------------------------------------------------------------------------------------------------------------------------------------------------------------------------------------------------------------------------------------------------------------------------------------------------------------------------------------------------------------------------------------------------------------------------------------------------------------------------------------------------------------------------------------------------------------------------|
| Journal:                        | <i>BMJ Open</i>                                                                                                                                                                                                                                                                                                                                                                                                                                                                                                                                                                                                                                                                                                                                                                                                                            |
| Manuscript ID                   | bmjopen-2022-070827.R1                                                                                                                                                                                                                                                                                                                                                                                                                                                                                                                                                                                                                                                                                                                                                                                                                     |
| Article Type:                   | Original research                                                                                                                                                                                                                                                                                                                                                                                                                                                                                                                                                                                                                                                                                                                                                                                                                          |
| Date Submitted by the Author:   | 18-Aug-2023                                                                                                                                                                                                                                                                                                                                                                                                                                                                                                                                                                                                                                                                                                                                                                                                                                |
| Complete List of Authors:       | Deng, changjiang; Xinjiang Medical University Affiliated First Hospital, Department of Cardiology<br>Yan, Ju; Shaanxi Provincial People's Hospital<br>Zheng, Ying-Ying; Xinjiang Medical University Affiliated First Hospital<br>Wu, Ting-Ting; Xinjiang Medical University Affiliated First Hospital<br>Pan, Ying; Xinjiang Medical University Affiliated First Hospital, Department of Cardiology<br>Hou, Xian-Geng; Xinjiang Medical University Affiliated First Hospital<br>Wang, Si-Fan; Xinjiang Medical University Affiliated First Hospital, Department of Cardiology<br>Sirajidin, Subinur; Xinjiang Medical University Affiliated First Hospital<br>Aimaitijiang, Mikereyi; Xinjiang Medical University Affiliated First Hospital<br>Xie, Xiang; Xinjiang Medical University Affiliated First Hospital, Department of Cardiology |
| <b>Primary Subject Heading</b>: | Cardiovascular medicine                                                                                                                                                                                                                                                                                                                                                                                                                                                                                                                                                                                                                                                                                                                                                                                                                    |
| Secondary Subject Heading:      | Cardiovascular medicine, Pharmacology and therapeutics                                                                                                                                                                                                                                                                                                                                                                                                                                                                                                                                                                                                                                                                                                                                                                                     |
| Keywords:                       | Coronary intervention < CARDIOLOGY, CLINICAL PHARMACOLOGY, Coronary heart disease < CARDIOLOGY                                                                                                                                                                                                                                                                                                                                                                                                                                                                                                                                                                                                                                                                                                                                             |
|                                 |                                                                                                                                                                                                                                                                                                                                                                                                                                                                                                                                                                                                                                                                                                                                                                                                                                            |

SCHOLARONE™  
Manuscripts



I, the Submitting Author has the right to grant and does grant on behalf of all authors of the Work (as defined in the below author licence), an exclusive licence and/or a non-exclusive licence for contributions from authors who are: i) UK Crown employees; ii) where BMJ has agreed a CC-BY licence shall apply, and/or iii) in accordance with the terms applicable for US Federal Government officers or employees acting as part of their official duties; on a worldwide, perpetual, irrevocable, royalty-free basis to BMJ Publishing Group Ltd ("BMJ") its licensees and where the relevant Journal is co-owned by BMJ to the co-owners of the Journal, to publish the Work in this journal and any other BMJ products and to exploit all rights, as set out in our [licence](#).

The Submitting Author accepts and understands that any supply made under these terms is made by BMJ to the Submitting Author unless you are acting as an employee on behalf of your employer or a postgraduate student of an affiliated institution which is paying any applicable article publishing charge ("APC") for Open Access articles. Where the Submitting Author wishes to make the Work available on an Open Access basis (and intends to pay the relevant APC), the terms of reuse of such Open Access shall be governed by a Creative Commons licence – details of these licences and which [Creative Commons](#) licence will apply to this Work are set out in our licence referred to above.

Other than as permitted in any relevant BMJ Author's Self Archiving Policies, I confirm this Work has not been accepted for publication elsewhere, is not being considered for publication elsewhere and does not duplicate material already published. I confirm all authors consent to publication of this Work and authorise the granting of this licence.

1  
2  
3  
4 **1 Effectiveness of lipid-lowering therapy on mortality and**  
5  
6 **2 major adverse cardiovascular event outcomes in patients**  
7  
8  
9 **3 undergoing percutaneous coronary intervention: a network**  
10  
11 **4 meta-analysis of randomized controlled trials**

14 Chang-Jiang Deng<sup>1</sup>, Ju Yan<sup>2</sup>, Ying-Ying Zheng<sup>1</sup>, Ting-Ting Wu<sup>1</sup>, Ying Pan<sup>1</sup>, Xian-  
15 Geng Hou<sup>1</sup>, Si-Fan Wang<sup>1</sup>, Subinur Sirajidin<sup>1</sup>, Mikereyi Aimaitijiang<sup>1</sup>, Xiang Xie<sup>1</sup>

17  
18 1. Department of Cardiology, The First Affiliated Hospital of Xinjiang Medical  
19  
20  
21 University, Urumqi, 830011, P.R. China.

22  
23 2. Department of Cardiology, Shaanxi Provincial People's Hospital, Xi'an, 710000,  
24  
25  
26 P.R. China.

27  
28  
29 Correspondence authors:

30  
31 Xiang Xie, No. 137, Liyushan Road, Department of Cardiology, First Affiliated  
32  
33  
34 Hospital of Xinjiang Medical University, Urumqi, 830011 P.R., China. Tel:  
35  
36 +8609914366168; Email: xiangxie999@sina.com  
37  
38

39  
40  
41

42 **16 Abstract**

43  
44 **17 Background**

45  
46  
47 Emergency percutaneous coronary intervention (PCI) can quickly restore myocardial  
48  
49  
50 perfusion after acute coronary syndrome (ACS). Whether and which lipid-lowering  
51  
52  
53 regimens are effective in reducing major adverse cardiovascular events (MACEs) and  
54  
55  
56 mortality risk after PCI remain unclear.

57  
58  
59  
60

## 23 **Objective**

24 This study will assess the benefits of different lipid-lowering regimens on the risk of  
25 MACEs and mortality in the post-PCI population by network meta-analysis.

## 26 **Methods**

27 Public literature databases, including PubMed, Embase, and the Cochrane Library,  
28 were searched from inception to August 2022. Randomized controlled trials (RCTs)  
29 on lipid-lowering regimens in post-PCI populations were included and analyzed. The  
30 outcomes were the incidence of all-cause mortality and MACE, whether reported as  
31 dichotomous or hazard ratio (HR) statistics.

## 32 **Results**

33 Thirty-nine RCTs were included. For MACEs, alirocumab plus rosuvastatin (OR:  
34 0.18; 95% CI: 0.07-0.44;), evolocumab plus ezetimibe and statins (OR: 0.19; 95%  
35 CI:0.06-0.59), eicosapentaenoic acid (EPA) plus pitavastatin (HR: 0.67; 95% CI:  
36 0.49-0.96), and icosapent ethyl plus statins (HR: 0.73; 95% CI: 0.62-0.86) had  
37 significant advantages and relatively high rankings. For mortality, rosuvastatin (OR:  
38 0.30; 95% CI: 0.11-0.84), ezetimibe plus statins (OR: 0.55; 95% CI: 0.43-0.89) and  
39 icosapent ethyl plus statins (OR: 0.66; 95% CI: 0.45-0.96) had significant advantages  
40 compared to the control.

## 41 **Conclusion**

42 EPA, especially icosapent ethyl, plus statins had a beneficial effect on reducing the  
43 risk of MACEs and mortality in post-PCI patients. PCSK9i plus statins was able to  
44 reduce the risk of MACEs, but the risk of mortality remained unclear.

1  
2  
3  
4 45 **Key words:**lipid-lowering therapy, major adverse cardiovascular events, mortality,  
5  
6 46 network meta-analysis  
7

8 47

9 48

## 10 49 **Introduction**

11  
12  
13 50 Acute coronary syndrome (ACS) is a term used to refer to a range of conditions  
14  
15 51 associated with acute myocardial ischemia and/or infarction, which are usually due to  
16  
17 52 coronary artery occlusion and acute ischemic necrosis of the myocardium due to  
18  
19 53 progression of coronary atherosclerotic lesions(1-2).Emergency percutaneous  
20  
21 54 coronary intervention (PCI) can quickly restore myocardial perfusion(3). Although  
22  
23 55 the development of technological and procedural PCI have resulted in substantial  
24  
25 56 improvements in clinical outcomes, recurrent coronary events may still occur after  
26  
27 57 PCI(4).

28  
29 58 The view of "residual cardiovascular risk" was introduced because MACE still occurs  
30  
31 59 in some patients who received PCI during follow-up. PCI can treat focal  
32  
33 60 manifestations of systemic progressive disease, but the residual risk of acute coronary  
34  
35 61 syndrome is largely related to the systemic proatherosclerotic effect of poorly  
36  
37 62 controlled cardiovascular risk factors(5). Lowering lipid levels, especially LDL-C,  
38  
39 63 can halt the progression of coronary atherosclerosis and improve cardiovascular  
40  
41 64 outcomes. Based on this view, it is believed that long-term optimal lipid-lowering  
42  
43 65 therapy is effective in reducing long-term cardiovascular events after PCI. However,  
44  
45 66 the view was still subject to challenges.  
46  
47  
48  
49  
50  
51  
52  
53  
54  
55  
56

57 67  
58  
59  
60

1  
2  
3  
4 68 Based on data from the “Korea Acute Myocardial Infarction Registry”, the proponents  
5  
6 69 concluded that patients treated with statins had significantly lower rates of MACE,  
7  
8  
9 70 all-cause death, and cardiac death during the 2-year follow-up period after PCI  
10  
11 71 application(6). However, a study of postoperative follow-up of PCI patients enrolled  
12  
13  
14 72 in the Melbourne Interventional Group registry concluded that statins have no  
15  
16  
17 73 significant benefit to MACEs after PCI(6). The controversy may be based on two  
18  
19  
20 74 reasons: on the one hand, is that the optimal lipid reduction target may not be  
21  
22  
23 75 achieved by using single statins(7,8). On the other hand, long-term high-dose  
24  
25 76 application of statins increases the risk of intracerebral hemorrhage and other side  
26  
27  
28 77 effects(9,10).

29  
30 78  
31  
32 79 There is a consensus on preloading high-dose statins to reduce MACEs in the  
33  
34  
35 80 perioperative period with PCI(11,12). However, there is still insufficient evidence for  
36  
37  
38 81 the continued application of lipid-lowering drugs to reduce the risk of long-term  
39  
40  
41 82 MACE and mortality. This study will assess the benefits of different lipid-lowering  
42  
43  
44 83 regimens on the risk of MACEs and mortality in the post-PCI population by network  
45  
46  
47 84 meta-analysis.

## 48 85

## 49 86 **Methods**

50  
51  
52  
53 87 This study was performed in accordance with Preferred Reporting Items for  
54  
55  
56 88 Systematic Reviews and Meta-Analyses (PRISMA) guidelines. The study was  
57  
58  
59 89 registered with PROSPERO (CRD 42018099600).



1  
2  
3  
4 90 **Patient and Public Involvement**

5  
6 91 None

7  
8  
9 92

10  
11 93 **Search strategy**

12  
13  
14 94 Public literature databases, including PubMed, Embase, and the Cochrane Library,  
15  
16  
17 95 were searched from inception to August 2022 without language restrictions using the  
18  
19  
20 96 following search terms: (lipid-lowering or statin or simvastatin or rosuvastatin or  
21  
22 97 atorvastatin or fluvastatin or lovastatin or pravastatin or pitavastatin or mevastatin or  
23  
24 98 ezetimibe or “eicosapentaenoic acid” or “icosapent ethyl” or “bempedoic acid” or  
25  
26 99 fibrate or bezafibrate or gemfibrozil or fenofibrate or ciprofibrate or evolocumab or  
27  
28  
29 100 alirocumab or evinocumab or volanesorsen or vupanorsen or pelacarsen or olezarsen  
30  
31  
32 101 or inclisiran or olpasiran) and (“percutaneous coronary intervention” or “coronary  
33  
34 102 angioplasty”) and (random\* or randomized or randomized). The references of  
35  
36  
37 103 relevant systematic reviews and meta-analyses were also searched to avoid omissions.  
38  
39  
40 104 The two authors conducted literature retrieval independently, and any conflicts were  
41  
42  
43 105 resolved through discussion with the third author.  
44  
45  
46 106

47  
48 107 **Inclusion and exclusion criteria**

49  
50  
51 108 The literature was included if it met the following criteria: 1, the study adopted a  
52  
53 109 randomized controlled study design; 2, the study included patients who received PCI  
54  
55  
56 110 surgery or reported the subgroup of the population that received PCI; 3, the lipid-  
57  
58  
59 111 lowering regimen was applied to the population of the intervention group; 4, the  
60

1  
2  
3  
4 112 control group used a different lipid-lowering agent or regimen; and 5, the study  
5  
6 113 reported the outcome of mortality and/or MACE. Exclusion criteria: 1, as preloading  
7  
8  
9 114 of statins before PCI had clear benefits, to determine whether application of lipid-  
10  
11 115 lowering drugs after PCI also had beneficial effects. This work excluded the study on  
12  
13 116 the preloading application of lipid-lowering drugs before PCI; 2, although high-dose  
14  
15 117 lipid-lowering agents, such as statins, have a better lipid-lowering effect, long-term  
16  
17 118 application may bring potential side effects(9-13). In this study, all agents were  
18  
19 119 considered to be applied with reasonable doses, and dose–response studies were  
20  
21 120 excluded. In addition, repeatedly published studies, protocols, conference abstracts,  
22  
23 121 reviews, comments and editorials were also excluded.  
24  
25  
26  
27  
28  
29

30 122

31  
32 123 Data extraction and quality assessment  
33  
34

35 124 Two authors independently extracted the information from the included studies. The  
36  
37 125 contents include the name of the first author, publication year, study location, sample  
38  
39 126 size (population received PCI), study abbreviation and registration number, lipid-  
40  
41 127 lowering intervention and control, and follow-up time.  
42  
43  
44

45 128

46  
47  
48 129 The outcomes analyzed were the incidence of all-cause mortality and MACE, whether  
49  
50 130 reported as dichotomous or hazard ratio (HR) statistics based on Cox regression. The  
51  
52 131 MACE outcome was selected to most closely approximate the composite endpoint,  
53  
54 132 including mortality, MI, stroke, coronary revascularization, and restenosis. Study  
55  
56 133 quality was assessed by two investigators using the Cochrane risk of bias assessment  
57  
58  
59  
60

1  
2  
3  
4 134 tool, which included random sequence generation, allocation concealment, blinding of  
5  
6 135 participants and personnel, blinding of outcome assessment, incomplete outcome data,  
7  
8  
9 136 selective reporting, and other potential biases.  
10

11  
12 137

13  
14 138 Statistical analysis

15  
16  
17 139 For each direct paired comparison, we used the odds ratios and their 95% confidence  
18  
19 140 intervals (CIs) for dichotomous outcomes. The hazard ratios and their 95% CIs based  
20  
21  
22 141 on Cox regression results were also pooled for reporting. We conducted frequentist  
23  
24 142 network meta-analysis (NMA) using random effect models with restricted maximum  
25  
26  
27 143 likelihood estimation to quantify network heterogeneity. The Q statistic was used to  
28  
29  
30 144 assess the sum of statistics for heterogeneity (within designs) and for overall  
31  
32  
33 145 inconsistency (between designs)<sup>(14)</sup>. The ranking probabilities of each regimen were  
34  
35 146 estimated using the surface under the cumulative ranking curve (SUCRA), and a  
36  
37  
38 147 comparison-adjusted funnel plot was used to examine potential publication biases in  
39  
40  
41 148 NMA. P values of less than 0.05 were considered to be statistically significant. The  
42  
43 149 NMA was performed using R language with the “netmeta” package.  
44

45  
46 150

## 47 48 151 **Results**

49  
50  
51 152 After removing duplications, we obtained 1588 literature items. After a screen of the  
52  
53 153 titles and abstracts, 1515 irrelevant studies were excluded. Seventy-three articles were  
54  
55  
56 154 screened for full text. The following articles were excluded: dose–response studies  
57  
58  
59 155 (8), no PCI population or subgroup was reported (6); no mortality or MACE-related  
60

1  
2  
3  
4 156 outcomes were reported (6); repeated publication (5); study related to preloading of  
5  
6 157 lipid-lowering agents (4); study not related to lipid-lowering agents (3); protocol (1);  
7  
8  
9 158 non-RCT design (1). Finally, 39 articles were included containing 54478 patients after  
10  
11 159 PCI(15-53) (Figure 1).  
12  
13  
14  
15  
16

161 Among the included studies, the publication period ranged from 1991 to 2022. The  
162 research locations were mainly in Asia (China, Japan and South Korea), Europe  
163 (Netherlands, France, and Italy), America, and multiple centers. There were 10 studies  
164 with sample sizes greater than 1000 patients. There were also 22 studies with publicly  
165 available clinical study registration numbers (Table 1). In terms of design quality, all  
166 included studies were RCTs. Therefore, the design quality is generally high. The main  
167 factors potentially affecting design quality were the blinding of participants and  
168 personnel and blinding of outcome assessment (Figure 2). However, as the desired  
169 outcomes were mortality and MACE, the subjective factors of the investigator had  
170 little influence on the outcomes.  
171

171 **Table 1. The characteristics of included studies**

| Study                       | Location    | Sample size | Abbreviation  | Register ID   | Intervention                      | Control                | Follow-up# |
|-----------------------------|-------------|-------------|---------------|---------------|-----------------------------------|------------------------|------------|
| Lorenz Räber 2022 [15]      | European    | 300         | PACMAN-AMI    | NCT03067844   | Alirocumab;rosuvastatin           | Placebo;rosuvastatin   | 52W        |
| Peterson, B. E. 2022 [16]   | Multicenter | 3408        | REDUCE-IT PCI | NCT01492361   | Icosapent ethyl;statins           | Placebo;statins        | 4.8Y       |
| Remo H.M. Furtado 2022 [17] | Multicenter | 17073       | FOURIER       | NCT01764633   | Evolocumab;statins                | Placebo;statins        | 2.2Y       |
| Tomoaki Okada 2022 [18]     | Japan       | 102         | -             | UMIN000028729 | Evolocumab;pitavastatin           | Pitavastatin           | 4W         |
| Yan Hao 2022 [19]           | China       | 136         | -             | -             | Evolocumab;atorvastatin;ezetimibe | Ezetimibe;atorvastatin | 3M         |
| Deng YF 2021 [20]           | China       | 90          | -             | -             | Ezetimibe;atorvastatin            | Atorvastatin           | 1Y         |

|                                        |             |       |                          |                     |                                                               |                      |       |
|----------------------------------------|-------------|-------|--------------------------|---------------------|---------------------------------------------------------------|----------------------|-------|
| <b>Sun C 2021 [21]</b>                 | China       | 171   | -                        | ChiCTR-IPR-17012219 | Ezetimibe;rosuvastatin                                        | Rosuvastatin         | 3M    |
| <b>Weifeng He 2020 [22]</b>            | China       | 192   | -                        | -                   | Atorvastatin vs. Rosuvastatin vs. Simvastatin                 | -                    | 6M    |
| <b>Kiyoshi Hibi 2018 [23]</b>          | Japan       | 128   | Ezetimibe-ACS            | NCT00549926         | Ezetimibe;pitavastatin                                        | Pitavastatin         | 1Y    |
| <b>Eui Im 2017 [24]</b>                | Korea       | 2000  |                          | NCT01557075         | Atorvastatin                                                  | Pravastatin          | 1Y    |
| <b>Hagiwara N 2017 [25]</b>            | Japan       | 1734  | HIJ-PROPER               | UMIN000002742       | Ezetimibe;pitavastatin                                        | Pitavastatin         | 36M   |
| <b>J Guo 2017 [26]</b>                 | China       | 137   | -                        | -                   | Rosuvastatin                                                  | Control              | 1Y    |
| <b>Wang YB 2017 [27]</b>               | China       | 132   | -                        | ChiCTR-IPR-15007035 | Pitavastatin                                                  | Atorvastatin         | 6M    |
| <b>Watanabe T 2017 [28]</b>            | Japan       | 193   | CHERRY                   | UMIN000002815       | EPA;pitavastatin                                              | Pitavastatin         | 6-8M  |
| <b>Zhi Liu 2017 [29]</b>               | China       | 102   | -                        | -                   | Ezetimibe;atorvastatin                                        | atorvastatin 20mg/d  | 1Y    |
| <b>Kazumasa Nosaka 2016 [30]</b>       | Japan       | 241   | -                        | UMIN000016723       | EPA;pitavastatin                                              | Pitavastatin         | 1Y    |
| <b>Kensuke Matsushita 2016 [31]</b>    | Japan       | 118   | Yokohama-ACS             | NCT00549926         | Atorvastatin vs. Pitavastatin vs. Pravastatin vs. Fluvastatin | -                    | 10.3M |
| <b>Christopher P Cannon 2015 [32]</b>  | Multicenter | 12941 | IMPROVE-IT               | NCT00202878         | Ezetimibe;simvastatin                                         | Simvastatin          | 6M    |
| <b>Kenichi Tsujita 2015 [33]</b>       | Multicenter | 246   | PRECISE-IVUS             | NCT01043380         | Ezetimibe;atorvastatin                                        | Atorvastatin         | 1Y    |
| <b>Stephen J. Nicholls 2015 [34]</b>   | Multicenter | 3295  | VISTA-16                 | NCT01130246         | Varespladib;atorvastatin                                      | Placebo;atorvastatin | 6M    |
| <b>Zhang JR 2015 [35]</b>              | China       | 104   | -                        | -                   | Atorvastatin                                                  | Rosuvastatin         | 6M    |
| <b>Mario Leoncin 2014 [36]</b>         | Italy       | 333   | PRATO-ACS                | NCT01185938         | Rosuvastatin                                                  | Control              | 6M    |
| <b>Hiroyuki Takano 2013 [37]</b>       | Japan       | 458   | PEARL                    | UMIN000000428       | Pitavastatin                                                  | Control              | 35.5M |
| <b>Tsuyoshi Nozue 2013 [38]</b>        | Japan       | 164   | TRUTH                    | UMIN000004627       | Pitavastatin                                                  | Pravastatin          | 2Y    |
| <b>Jean-Marc Lablanche 2010 [39]</b>   | Multicenter | 887   | CENTAURUS                | NCT00296387         | Rosuvastatin                                                  | Atorvastatin         | 3M    |
| <b>C. Michael Gibson 2009 [40]</b>     | US          | 2868  | PROVE IT-TIMI 22         | NCT00382460         | Atorvastatin                                                  | Pravastatin          | 2Y    |
| <b>Han Yaling 2009 [41]</b>            | China       | 1275  | -                        | NCT00405717         | Atorvastatin                                                  | Pravastatin          | 1Y    |
| <b>Takafumi Hiro 2009 [42]</b>         | Japan       | 307   | JAPAN-ACS                | NCT00242944         | Pitavastatin                                                  | Atorvastatin         | 1Y    |
| <b>Tomotaka Dohi 2009 [43]</b>         | Japan       | 180   | Extended-ESTABLISH trial | -                   | Atorvastatin                                                  | Control              | 4Y    |
| <b>Toru Toi 2009 [44]</b>              | Japan       | 160   | -                        | -                   | Pitavastatin                                                  | Atorvastatin         | 17D   |
| <b>Xu Kai 2007 [45]</b>                | China       | 648   | -                        | -                   | Atorvastatin                                                  | Control              | 2Y    |
| <b>Bae JH 2004 [46]</b>                | Korea       | 205   | -                        | -                   | Atorvastatin                                                  | Control              | 6M    |
| <b>Patrick W J C Serruys 2002 [47]</b> | Multicenter | 1677  | LIPS                     | -                   | Fluvastatin                                                   | Placebo              | 3.9Y  |
| <b>Han J.G.H. Mulder 2000 [48]</b>     | Netherlands | 201   | REGRESS                  | -                   | Pravastatin                                                   | Placebo              | 2Y    |
| <b>Greg C. Flaker 1999 [49]</b>        | Multicenter | 1154  | CARE trial               | -                   | Pravastatin                                                   | Placebo              | 6Y    |

|                              |        |     |         |   |                    |         |    |
|------------------------------|--------|-----|---------|---|--------------------|---------|----|
| MICHEL E. BERTRAND 1997 [50] | France | 695 | PREDICT | - | Pravastatin        | Placebo | 6M |
| J H O'Keefe Jr 1996 [51]     | US     | 200 | APPLE   | - | Probuco;lovastatin | Placebo | 6M |
| Haruhiko Onaka 1994 [52]     | Japan  | 66  | -       | - | Pravastatin        | Control | 5M |
| Rakesh Sahni 1991 [53]       | US     | 157 | -       | - | Lovastatin         | Control | 6M |

172

173 Abbreviations: EPA: eicosapentaenoic acid.

174 #: Follow-up period: Y: years; M: months; W: weeks; D: days

175 As two studies did not specify the types of statins, the network meta-analysis will  
 176 be divided into two parts. One part was analyzed based on specific types of statins,  
 177 and the other was based on taking statins as a whole. For the dichotomous results of  
 178 MACE, the NMA based on specific types of statins included 18 lipid-lowering  
 179 regimens. The Q test for heterogeneity was  $p = 0.07$ , and for inconsistency, it was  $p =$   
 180  $0.16$ , indicating no evidence for heterogeneity and inconsistency in the NMA.

181 In pairwise comparisons with the control, alirocumab plus rosuvastatin (OR: 0.18;  
 182 95% CI: 0.07-0.44; SUCRA: 0.94), evolocumab plus atorvastatin and ezetimibe (OR:  
 183 0.18; 95% CI: 0.05-0.63; SUCRA: 0.90), ezetimibe plus rosuvastatin (OR: 0.29; 95%  
 184 CI: 0.11-0.76; SUCRA: 0.80) have significant advantages and relatively high SUCRA  
 185 rankings. No potential publication bias was found according to the comparison-  
 186 adjusted funnel plot (Figure 3).

187

188 In the NMA based on taking statins as a whole, ten regimens were analyzed.  
 189 Evolocumab plus ezetimibe and statins (OR: 0.19; 95% CI: 0.06-0.59; SUCRA: 0.92),  
 190 alirocumab plus statins (OR: 0.27; 95% CI: 0.13-0.59; SUCRA: 0.87), and coscapent

1  
2  
3  
4 191 ethyl plus statins (OR: 0.39; 95% CI: 0.25-0.62; SUCRA: 0.72) have significant  
5  
6 192 advantages and relatively high SUCRA rankings. No potential publication bias was  
7  
8  
9 193 found.

10  
11 194  
12  
13  
14 195 For the HR results of MACEs, the NMA based on specific types of statins included  
15  
16 196 nine regimens. The Q test for heterogeneity was  $p = 0.964$  and because the network  
17  
18 197 comparisons lack loops. Therefore, the results were considered consistent. Compared  
19  
20 198 to the control, eicosapentaenoic acid (EPA) plus pitavastatin (HR: 0.67; 95% CI:  
21  
22 199 0.49-0.96; SUCRA: 0.91), atorvastatin (HR: 0.76; 95% CI: 0.63-0.90; SUCRA: 0.83),  
23  
24 200 and varespladib plus atorvastatin (HR: 0.77; 95% CI: 0.61-0.97; SUCRA: 0.77) have  
25  
26 201 significant advantages and relatively high SUCRA rankings. Potential publication bias  
27  
28 202 was not analyzed due to a smaller number of included studies.  
29  
30  
31  
32  
33  
34

35 203  
36  
37 204 In the NMA based on taking statins as a whole, seven regimens were analyzed. EPA  
38  
39 205 plus statins (HR: 0.60; 95% CI: 0.42-0.85; SUCRA: 0.96) and icosapent ethyl plus  
40  
41 206 statins (HR: 0.73; 95% CI: 0.62-0.86; SUCRA: 0.81) had significant advantages over  
42  
43 207 the control.  
44  
45  
46  
47

48 208  
49  
50 209 For the dichotomous results of mortality, the NMA based on specific types of statins  
51  
52 210 included 17 lipid-lowering regimens. The Q test for heterogeneity was  $p = 0.78$ , and  
53  
54 211 for inconsistency, it was  $p = 0.99$ . Due to the rare occurrence of events, the results of  
55  
56 212 the comparison were low precision with a large standard error. Compared to the  
57  
58  
59  
60

1  
2  
3  
4 213 control, only rosuvastatin (OR: 0.30; 95% CI: 0.11-0.84; SUCRA: 0.79) showed a  
5  
6 214 significantly better effect. Ezetimibe plus rosuvastatin had a relatively high SUCRA  
7  
8  
9 215 ranking, but there was no significant difference compared to the control (OR: 0.14;  
10  
11 216 95% CI: 0.02-1.26; SUCRA: 0.86). No potential publication bias was found (Figure  
12  
13  
14 217 4).

15  
16  
17 218

18  
19 219 In the NMA based on taking statins as a whole, nine regimens were analyzed.  
20  
21  
22 220 Ezetimibe plus statins (OR: 0.55; 95% CI: 0.43-0.89; SUCRA: 0.75) and icosapent  
23  
24 221 ethyl plus statins (OR: 0.66; 95% CI: 0.45-0.96; SUCRA: 0.63) had significant  
25  
26  
27 222 advantages compared with the blank control group. No potential publication bias  
28  
29  
30 223 existed. NMA analysis was not performed due to the small number of studies  
31  
32  
33 224 reporting HR for mortality (Figure 5).

34  
35 225

## 36 37 226 **Discussion**

38  
39  
40 227 This study analyzed the benefits of lipid-lowering therapy on mortality and MACE  
41  
42  
43 228 outcomes in patients who received PCI by network meta-analysis. The results showed  
44  
45  
46 229 that several lipid-lowering regimens could reduce the risk of MACEs compared with  
47  
48  
49 230 the blank control. Icosapent ethyl plus statins had the benefit of reducing both the risk  
50  
51  
52 231 of MACEs and mortality. However, EPA plus statins had more advantages in  
53  
54  
55 232 reducing the risk of MACEs. Of note, based on the current evidence, alirocumab and  
56  
57  
58 233 evolocumab plus statins had obvious advantages in reducing the risk of MACEs but  
59  
60 234 had no obvious benefit in reducing the risk of mortality.



1  
2  
3  
4 235

5  
6 236 EPA is a long-chain omega-3 polyunsaturated fatty acid. Long-term intake of EPA  
7  
8  
9 237 can reduce the residual cardiovascular risk to reduce the risk of MACEs(54). In terms  
10  
11 238 of pathological mechanisms, EPA combined with pitavastatin can reduce the lipid  
12  
13 239 volume of coronary artery plaque and total atherosclerotic plaque volume in patients  
14  
15  
16 240 who receive PCI, which may be the reason for the reduced risk of MACEs(55).  
17  
18

19 241

20  
21  
22 242 Icosapent ethyl is a highly purified and stable eicosapentaenoic acid ethyl ester that  
23  
24 243 has potential higher anti-inflammatory, antioxidant, plaque stability and cell  
25  
26 244 membrane stability effects(56). In the NMA results, icosapent ethyl plus statins had  
27  
28 245 significant benefits for either mortality or MACEs in patients who received PCI,  
29  
30 246 which was an ideal regimen for the population.  
31  
32

33 247

34  
35  
36  
37 248 Ezetimibe inhibits the absorption of cholesterol and has a synergistic lipid-lowering  
38  
39 249 pharmacological effect with statins to further reduce the risk of death and MACE. In  
40  
41 250 particular, when combined with rosuvastatin, it has a stronger lipid-lowering effect  
42  
43 251 with a high safety profile without the risk of drug interactions(57). Our NMA results  
44  
45 252 also showed that it can reduce the risk of MACE and mortality. According to the  
46  
47 253 guidelines for the management of dyslipidemia from the European Society of  
48  
49 254 Cardiology and the European Atherosclerosis Society, ezetimibe was recommended if  
50  
51 255 the LDL-C level was not reached(58,59). The American College of Cardiology  
52  
53 256 guidelines also recommend adding ezetimibe when using maximally tolerated statin  
54  
55  
56  
57  
58  
59  
60

1  
2  
3  
4 257 therapy and if LDL-C levels remain  $\geq 70$  mg/dL(60). These benefits have also been  
5  
6 258 demonstrated in the secondary prevention of PCI.  
7  
8  
9 259  
10  
11 260 Alirocumab and evolumab are both proprotein convertase subtilisin/kexin type 9  
12  
13 261 inhibitors (PCSK9i), which can increase the level of LDL receptor in the liver, thus  
14  
15 262 improving the ability of the liver to bind LDL-C and reducing the level of peripheral  
16  
17 263 LDL-C(61). There was also a synergistic lipid-lowering pharmacological effect when  
18  
19 264 PCSK9i was combined with statins that significantly reduced LDL-C and  
20  
21 265 atherosclerosis event risk; however, there was still controversy regarding the mortality  
22  
23 266 risk reduction(62). It has been suggested that the powerful effect of PCSK9I on  
24  
25 267 reducing LDL-C predisposes patients to hypocholesterolemia, which will not increase  
26  
27 268 the risk of cerebral hemorrhage ,PCSK9i may be a preferred lipid-lowering agent in  
28  
29 269 patients with elevated ICH risk(63,64). On the other hand, PCSK9i could not reduce  
30  
31 270 serum inflammatory factors, suggesting that it may not reduce the risk of residual  
32  
33 271 inflammation in the post-PCI population(65).  
34  
35  
36  
37  
38  
39  
40  
41  
42  
43 272  
44  
45 273 In the results of this study, lipid-lowering therapy strategies had general advantages in  
46  
47 274 reducing MACE risk. However, for all-cause mortality, the advantage of lipid-  
48  
49 275 lowering therapy was not obvious. Based on dichotomous outcomes of mortality,  
50  
51 276 some strategies may even have a tendency to increase the mortality risk. This  
52  
53 277 challenges the opinion that lipid-lowering therapy is recommended after PCI(66). A  
54  
55 278 large sample size retrospective study suggests that statins can reduce the risk of all-  
56  
57  
58  
59  
60

1  
2  
3  
4 279 cause death in patients with coronary artery disease undergoing PCI, regardless of  
5  
6 280 personal cholesterol levels(67). Alternatively, the “Lipid Paradox” view has been  
7  
8  
9 281 proposed and indicated that higher levels of LDL-C and triglycerides on admission  
10  
11 282 are associated with better clinical outcomes. Especially in patients with ST-elevation  
12  
13  
14 283 myocardial infarction, lower LDL-C levels were associated with worse mortality  
15  
16  
17 284 outcomes(68). However, this view is also controversial(69).

18  
19  
20 285

21  
22 286 On the other hand, it is possible that the contribution of LDL-C reduction to the risk  
23  
24 287 of mortality outcomes is obscured by the other confounding factors. For example,  
25  
26  
27 288 inflammatory status may also have an important impact on patient mortality risk. In a  
28  
29  
30 289 cohort of post-PCI patients with low LDL-C levels, residual inflammatory risk also  
31  
32 290 had a significant effect on overall mortality(70). C-reactive protein can also predict  
33  
34  
35 291 long-term mortality in post-PCI patients independent of LDL-C levels(71). In  
36  
37  
38 292 addition, cardiac remodeling also has an important impact on the survival outcome of  
39  
40 293 people after PCI(72).

41  
42  
43 294 There are still several limitations in this study. First, this study was based on the study  
44  
45 295 level instead of the individual level, making it difficult to consider the individual  
46  
47  
48 296 confounding factors in the analysis. Second, two included studies did not specify the  
49  
50  
51 297 type of statins, so our study had to be analyzed separately according to whether all  
52  
53 298 statins were considered as a whole. Third, the criteria for defining MACEs varied  
54  
55  
56 299 among studies that contributed to heterogeneity among the study results. Fourth,  
57  
58 300 many included studies reported only dichotomous outcomes but did not report the HR  
59  
60

1  
2  
3  
4 301 results, resulting in the incompleteness of the relevant analysis results.  
5  
6

7 302  
8

9 303  
10

11 304 In conclusion, the results of this study suggest that EPA, especially icosapent ethyl,  
12

13  
14 305 plus statins had a beneficial effect on reducing the risk of MACEs and mortality in  
15

16  
17 306 post-PCI patients. PCSK9i plus statins was able to reduce the risk of MACEs, but the  
18

19 307 risk of mortality remained unclear.  
20  
21

22 308  
23

24  
25 309

#### 26 310 **Acknowledgements**

27  
28 311 We thank Professor Xiang Xie for his support.  
29

30 312  
31

#### 32 313 **Author contributions**

33  
34 314 Chang-Jiang Deng completed the manuscript, Ju Yan, Ting-Ting Wu, Ying Pan, Ying-

35  
36 315 Ying Zheng guided the data analysis and the production of the figures, Xian-Geng

37  
38 316 Hou, Si-Fan Wang, Subinur Sirajidin, Mikereyi Aimaitijiang, Xiang Xie read and

39 317 approved the final manuscript.  
40  
41

42 318

#### 43 319 **Funding**

44  
45 320 No funding  
46

46 321  
47

#### 48 322 **Availability of data and materials**

49  
50 323 the datasets used or analysed during the current study are available from the

51 324 corresponding author on reasonable request.  
52  
53

53 325

#### 54 326 **Declarations**

55  
56 327

#### 58 328 **Ethics approval and consent to participate**

59  
60

1  
2  
3 329 This study does not involve human participants and ethical approval was not required.  
4  
5 330

6  
7 331 **Consent for publication**

8 332 not applicable.  
9

10 333

11  
12 334 **Competing interests**

13  
14 335 The authors declare that they have no competing interests.  
15

16  
17 336 **References**

18  
19 337 [dataset]1.Yoshihara S (2022) Acute coronary syndrome on non-electrocardiogram-  
20  
21  
22 338 gated contrast-enhanced computed tomography. *World J Radiol*14(2):30-46.

23  
24 339 [dataset]2.Ferri N, Ruscica M, Lupo MG, Vicenzi M, Sirtori CR, Corsini A (2022)

25  
26 340 Pharmacological rationale for the very early treatment of acute coronary syndrome

27  
28 341 with monoclonal antibodies anti-PCSK9. *Pharmacol Res* 184:106439.

29  
30 342 [dataset]3.Feng KF, Wu M, Ma LK (2021) Factors Associated with the Prognosis of

31  
32 343 Patients with Acute Myocardial Infarction and Cardiogenic Shock. *Med Sci Monit*

33  
34 344 27:e929996.

35  
36 345 [dataset]4.Koskinas KC, Mach F, Raber L (2021) Lipid-lowering therapy and

37  
38 346 percutaneous coronary interventions. *EuroIntervention* 16(17):1389-403.

39  
40 347 [dataset]5.Kim YH, Her AY, Jeong MH, Kim BK, Shin DH, Kim JS, Ko YG, Choi D,

41  
42 348 Hong MK, Jang Y (2019) Two-year outcomes of statin therapy in patients with acute

43  
44 349 myocardial infarction with or without dyslipidemia after percutaneous coronary

45  
46 350 intervention in the era of new-generation drug-eluting stents within Korean

47  
48 351 population: Data from the Korea Acute Myocardial Infarction Registry. *Catheter*

49  
50 352 *Cardiovasc Interv* 93(7):1264-75.  
51  
52  
53  
54  
55  
56  
57  
58  
59  
60

- 1  
2  
3  
4 353 [dataset]6.Chin KL, Wolfe R, Reid CM, Tonkin A, Hopper I, Brennan A,  
5  
6 354 Andrianopoulos N, Duffy SJ, Clark D, Ajani A, Liew D, Melbourne Interventional G  
7  
8  
9 355 (2018) Does Statin Benefits Patients with Heart Failure Undergoing Percutaneous  
10  
11 356 Coronary Intervention? Findings from the Melbourne Interventional Group Registry.  
12  
13  
14 357 *Cardiovasc Drugs Ther* 32(1):57-64.
- 16  
17 358 [dataset]7.Ray KK, Molemans B, Schoonen WM, Giovass P, Bray S, Kiru G, Murphy  
18  
19 359 J, Banach M, De Servi S, Gaita D, Gouni-Berthold I, Hovingh GK, Jozwiak JJ,  
20  
21 360 Jukema JW, Kiss RG, Kownator S, Iversen HK, Maher V, Masana L, Parkhomenko  
22  
23 361 A, Peeters A, Clifford P, Raslova K, Siostrzonek P, Romeo S, Tousoulis D,  
24  
25 362 Vlachopoulos C, Vrablik M, Catapano AL, Poulter NR (2021) study DVEU-Wide  
26  
27 363 Cross-Sectional Observational Study of Lipid-Modifying Therapy Use in Secondary  
28  
29 364 and Primary Care: the DA VINCI study. *Eur J Prev Cardiol* 28(11):1279-89.
- 31  
32 365 [dataset]8.Rea F, Savare L, Corrao G, Mancina G (2021) Adherence to Lipid-  
33  
34 366 Lowering Treatment by Single-Pill Combination of Statin and Ezetimibe. *Adv Ther*  
35  
36 367 38(10):5270-85.
- 38  
39 368 [dataset]9.Pandit AK, Kumar P, Kumar A, Chakravarty K, Misra S, Prasad K (2016)  
40  
41 369 High-dose statin therapy and risk of intracerebral hemorrhage: a meta-analysis. *Acta*  
42  
43 370 *Neurol Scand* 134(1):22-8.
- 45  
46 371 [dataset]10. Bellosta S, Corsini A (2018) Statin drug interactions and related adverse  
47  
48 372 reactions: an update. *Expert Opin Drug Saf* 17(1):25-37.
- 50  
51 373 [dataset]11.Yang X, Lan X, Zhang XL, Han ZL, Yan SM, Wang WX, Xu B, Ge WH  
52  
53 374 (2022) Intensive vs non-intensive statin pretreatment before percutaneous coronary  
54  
55  
56  
57  
58  
59  
60

- 1  
2  
3  
4 375 intervention in Chinese patients: A meta-analysis of randomized controlled trials.  
5  
6 376 World J Clin Cases 10(5):1557-71.  
7  
8  
9 377 [dataset]12.Borovac JA, Leth-Olsen M, Kumric M, D'Amario D, Schwarz K, Glavas  
10  
11 378 D, Bozic J (2022) Efficacy of high-dose atorvastatin or rosuvastatin loading in  
12  
13 379 patients with acute coronary syndrome undergoing percutaneous coronary  
14  
15 380 intervention: a meta-analysis of randomized controlled trials with GRADE  
16  
17 381 qualification of available evidence. Eur J Clin Pharmacol 78(1):111-26.  
18  
19 382 [dataset]13.Vinci P, Panizon E, Tosoni LM, Cerrato C, Pellicori F, Mearelli F,  
20  
21 383 Biasinutto C, Fiotti N, Di Girolamo FG, Biolo G (2021) Statin-Associated Myopathy:  
22  
23 384 Emphasis on Mechanisms and Targeted Therapy. Int J Mol Sci 22(21).  
24  
25 385 [dataset]14.Luo Y, Chaimani A, Furukawa TA, Kataoka Y, Ogawa Y, Cipriani A,  
26  
27 386 Salanti G (2021) Visualizing the evolution of evidence: Cumulative network meta-  
28  
29 387 analyses of new generation antidepressants in the last 40 years. Res Synth Methods  
30  
31 388 12(1):74-85.  
32  
33 389 [dataset]15.Raber L, Ueki Y, Otsuka T, Losdat S, Haner JD, Lonborg J, Fahrni G,  
34  
35 390 Iglesias JF, van Geuns RJ, Ondracek AS, Radu Juul Jensen MD, Zanchin C, Stortecky  
36  
37 391 S, Spirk D, Siontis GCM, Saleh L, Matter CM, Daemen J, Mach F, Heg D,  
38  
39 392 Windecker S, Engstrom T, Lang IM, Koskinas KC, collaborators P-A (2022) Effect  
40  
41 393 of Alirocumab Added to High-Intensity Statin Therapy on Coronary Atherosclerosis  
42  
43 394 in Patients With Acute Myocardial Infarction: The PACMAN-AMI Randomized  
44  
45 395 Clinical Trial. JAMA 327(18):1771-81.  
46  
47 396 [dataset]16.Peterson BE, Bhatt DL, Steg PG, Miller M, Brinton EA, Jacobson TA,  
48  
49  
50  
51  
52  
53  
54  
55  
56  
57  
58  
59  
60

- 1  
2  
3  
4 397 Ketchum SB, Juliano RA, Jiao L, Doyle RT, Jr., Granowitz C, Gibson CM, Pinto D,  
5  
6 398 Giugliano RP, Budoff MJ, Tardif JC, Verma S, Ballantyne CM, Investigators R-I  
7  
8  
9 399 (2022) Treatment With Icosapent Ethyl to Reduce Ischemic Events in Patients With  
10  
11 400 Prior Percutaneous Coronary Intervention: Insights From REDUCE-IT PCI. *J Am*  
12  
13 401 *Heart Assoc* 11(6):e022937.  
14  
15  
16 402 [dataset]17.Furtado RHM, Fagundes AA, Jr., Oyama K, Zelniker TA, Tang M, Kuder  
17  
18 403 JF, Murphy SA, Hamer A, Wang H, Keech AC, Giugliano RP, Sabatine MS,  
19  
20 404 Bergmark BA (2022) Effect of Evolocumab in Patients With Prior Percutaneous  
21  
22 405 Coronary Intervention. *Circ Cardiovasc Interv* 15(3):e011382.  
23  
24  
25 406 [dataset]18.Okada T, Miyoshi T, Doi M, Nosaka K, Tsushima R, Ugawa S, Takagi  
26  
27 407 W, Sogo M, Takahashi M, Ito H (2022) Effect of Early Initiation of Evolocumab on  
28  
29 408 Lipoprotein(a) in Patients with Acute Myocardial Infarction: Sub-Analysis of a  
30  
31 409 Randomized Controlled Trial. *J Cardiovasc Dev Dis* 9(5).  
32  
33 410 [dataset]19.Hao Y, Yang YL, Wang YC, Li J (2022) Effect of the Early Application  
34  
35 411 of Evolocumab on Blood Lipid Profile and Cardiovascular Prognosis in Patients with  
36  
37 412 Extremely High-Risk Acute Coronary Syndrome. *Int Heart J* 63(4):669-77.  
38  
39 413 [dataset]20.Deng Y, He S, Wang D, Dai C, Xu X, Zhang J (2021) Clinical study of  
40  
41 414 effect of ezetimibe combined with statins on residual lipoprotein cholesterol and  
42  
43 415 MACE events in patients undergoing emergency intervention with acute coronary  
44  
45 416 syndrome. *Chinese Journal of Clinical Pharmacology and Therapeutics* 26(9):1048-  
46  
47 417 52.  
48  
49 418 [dataset]21.Sun C, Zheng W, Liang L, Liu Z, Sun W, Tang R (2021) Ezetimibe  
50  
51  
52  
53  
54  
55  
56  
57  
58  
59  
60



- 1  
2  
3  
4 419 Improves Rosuvastatin Effects on Inflammation and Vascular Endothelial Function in  
5  
6 420 Acute Coronary Syndrome Patients Undergoing PCI. *J Interv Cardiol* 2021:2995602.  
7  
8  
9 421 [dataset]22.He W, Cao M, Li Z (2020) Effects of different doses of atorvastatin,  
10  
11 422 rosuvastatin, and simvastatin on elderly patients with ST-elevation acute myocardial  
12  
13 423 infarction (AMI) after percutaneous coronary intervention (PCI). *Drug Dev Res.*  
14  
15 424 2020;81(5):551-6.  
16  
17  
18  
19 425 [dataset]23.Hibi K, Sonoda S, Kawasaki M, Otsuji Y, Murohara T, Ishii H, Sato K,  
20  
21 426 Koshida R, Ozaki Y, Sata M, Morino Y, Miyamoto T, Amano T, Morita S, Kozuma  
22  
23 427 K, Kimura K, Fujiwara H, Ezetimibe ACSI (2018) Effects of Ezetimibe-Statin  
24  
25 428 Combination Therapy on Coronary Atherosclerosis in Acute Coronary Syndrome.  
26  
27 429 *Circ J* 82(3):757-66.  
28  
29  
30 430 [dataset]24.Im E, Cho YH, Suh Y, Cho DK, Her AY, Kim YH, Lee K, Kang WC,  
31  
32 431 Yun KH, Yoo SY, Cheong SS, Shin DH, Ahn CM, Kim JS, Kim BK, Ko YG, Choi  
33  
34 432 D, Jang Y, Hong MK (2018) High-intensity Statin Treatments in Clinically Stable  
35  
36 433 Patients on Aspirin Monotherapy 12 Months After Drug-eluting Stent Implantation: A  
37  
38 434 Randomized Study. *Rev Esp Cardiol (Engl Ed)* 71(6):423-31.  
39  
40  
41 435 [dataset]25.Hagiwara N, Kawada-Watanabe E, Koyanagi R, Arashi H, Yamaguchi J,  
42  
43 436 Nakao K, Tobaru T, Tanaka H, Oka T, Endoh Y, Saito K, Uchida T, Matsui K,  
44  
45 437 Ogawa H (2017) Low-density lipoprotein cholesterol targeting with pitavastatin +  
46  
47 438 ezetimibe for patients with acute coronary syndrome and dyslipidaemia: the HIJ-  
48  
49 439 PROPER study, a prospective, open-label, randomized trial. *Eur Heart J.*  
50  
51 440 2017;38(29):2264-76.  
52  
53  
54  
55  
56  
57  
58  
59  
60

1  
2  
3  
4 441 [dataset]26. Guo J, Zhang WZ, Zhao Q, Wo JS, Cai SL (2017) Study on the effect of  
5  
6 442 different doses of rosuvastatin on ventricular remodeling in patients with acute  
7  
8 443 coronary syndrome after emergency percutaneous coronary intervention. *Eur Rev*  
9  
10 444 *Med Pharmacol Sci* 21(19):4457-63.

11  
12  
13  
14 445 [dataset]27. Wang YB, Fu XH, Gu XS, Fan WZ, Jiang YF, Hao GZ, Miao Q, Cao J,  
15  
16 446 Fu B, Li Y (2017) Effects of intensive pitavastatin therapy on glucose control in  
17  
18 447 patients with non-ST elevation acute coronary syndrome. *Am J Cardiovasc Dis*  
19  
20 448 7(4):89-96.

21  
22  
23  
24 449 [dataset]28. Watanabe T, Ando K, Daidoji H, Otaki Y, Sugawara S, Matsui M, Ikeno  
25  
26 450 E, Hirono O, Miyawaki H, Yashiro Y, Nishiyama S, Arimoto T, Takahashi H,  
27  
28 451 Shishido T, Miyashita T, Miyamoto T, Kubota I, investigators Cs (2017) A  
29  
30 452 randomized controlled trial of eicosapentaenoic acid in patients with coronary heart  
31  
32 453 disease on statins. *J Cardiol* 70(6):537-44.

33  
34  
35  
36 454 [dataset]29. Liu Z, Hao H, Yin C, Chu Y, Li J, Xu D (2017) Therapeutic effects of  
37  
38 455 atorvastatin and ezetimibe compared with double-dose atorvastatin in very elderly  
39  
40 456 patients with acute coronary syndrome. *Oncotarget* 8(25):41582-9.

41  
42  
43  
44 457 [dataset]30. Nosaka K, Miyoshi T, Iwamoto M, Kajiya M, Okawa K, Tsukuda S,  
45  
46 458 Yokohama F, Sogo M, Nishibe T, Matsuo N, Hirohata S, Ito H, Doi M (2017) Early  
47  
48 459 initiation of eicosapentaenoic acid and statin treatment is associated with better  
49  
50 460 clinical outcomes than statin alone in patients with acute coronary syndromes: 1-year  
51  
52 461 outcomes of a randomized controlled study. *Int J Cardiol* 228:173-9.

53  
54  
55  
56 462 [dataset]31. Matsushita K, Hibi K, Komura N, Akiyama E, Maejima N, Iwahashi N,  
57  
58  
59  
60

- 1  
2  
3  
4 463 Tsukahara K, Kosuge M, Ebina T, Sumita S, Umemura S, Kimura K (2016) Effects of  
5  
6 464 4 Statins on Regression of Coronary Plaque in Acute Coronary Syndrome. *Circ J*  
7  
8  
9 465 80(7):1634-43.  
10  
11 466 [dataset]32.Cannon CP, Blazing MA, Giugliano RP, McCagg A, White JA, Theroux  
12  
13  
14 467 P, Darius H, Lewis BS, Ophuis TO, Jukema JW, De Ferrari GM, Ruzylo W, De  
15  
16  
17 468 Lucca P, Im K, Bohula EA, Reist C, Wiviott SD, Tershakovec AM, Musliner TA,  
18  
19 469 Braunwald E, Califf RM, Investigators I-I (2015) Ezetimibe Added to Statin Therapy  
20  
21  
22 470 after Acute Coronary Syndromes. *N Engl J Med* 372(25):2387-97.  
23  
24  
25 471 [dataset]33.Tsujita K, Sugiyama S, Sumida H, Shimomura H, Yamashita T,  
26  
27 472 Yamanaga K, Komura N, Sakamoto K, Oka H, Nakao K, Nakamura S, Ishihara M,  
28  
29  
30 473 Matsui K, Sakaino N, Nakamura N, Yamamoto N, Koide S, Matsumura T, Fujimoto  
31  
32  
33 474 K, Tsunoda R, Morikami Y, Matsuyama K, Oshima S, Kaikita K, Hokimoto S,  
34  
35 475 Ogawa H, Investigators P-I (2015) Impact of Dual Lipid-Lowering Strategy With  
36  
37  
38 476 Ezetimibe and Atorvastatin on Coronary Plaque Regression in Patients With  
39  
40  
41 477 Percutaneous Coronary Intervention: The Multicenter Randomized Controlled  
42  
43  
44 478 PRECISE-IVUS Trial. *J Am Coll Cardiol* 66(5):495-507.  
45  
46  
47 479 [dataset]34.Nicholls SJ, Kastelein JJ, Schwartz GG, Bash D, Rosenson RS, Cavender  
48  
49  
50 480 MA, Brennan DM, Koenig W, Jukema JW, Nambi V, Wright RS, Menon V, Lincoff  
51  
52  
53 481 AM, Nissen SE, Investigators V- (2014) Varespladib and cardiovascular events in  
54  
55  
56 482 patients with an acute coronary syndrome: the VISTA-16 randomized clinical trial.  
57  
58  
59 483 JAMA 311(3):252-62.  
60  
61 484 [dataset]35.Zhang JR, Wang DQ, Du J, Qu GS, Du JL, Deng SB, Liu YJ, Cai JX, She

- 1  
2  
3  
4 485 Q (2015) Efficacy of Clopidogrel and Clinical Outcome When Clopidogrel Is  
5  
6 486 Coadministered With Atorvastatin and Lansoprazole: A Prospective, Randomized,  
7  
8  
9 487 Controlled Trial. *Medicine (Baltimore)* 94(50):e2262.  
10  
11 488 [dataset]36. Leoncini M, Toso A, Maioli M, Tropeano F, Badia T, Villani S, Bellandi  
12  
13  
14 489 F (2014) Early high-dose rosuvastatin and cardioprotection in the protective effect of  
15  
16 490 rosuvastatin and antiplatelet therapy on contrast-induced acute kidney injury and  
17  
18 491 myocardial damage in patients with acute coronary syndrome (PRATO-ACS) study.  
19  
20  
21 492 *Am Heart J* 168(5):792-7.  
22  
23  
24 493 [dataset]37. Takano H, Mizuma H, Kuwabara Y, Sato Y, Shindo S, Kotooka N,  
25  
26  
27 494 Fujimatsu D, Kobayashi Y, Inoue T, Node K, Komuro I, Investigators PS (2013)  
28  
29 495 Effects of pitavastatin in Japanese patients with chronic heart failure: the Pitavastatin  
30  
31 496 Heart Failure Study (PEARL Study). *Circ J* 77(4):917-25.  
32  
33  
34 497 [dataset]38. Nozue T, Fukui K, Yamamoto S, Kunishima T, Umezawa S, Onishi Y,  
35  
36  
37 498 Tohyama S, Takeyama Y, Morino Y, Yamauchi T, Hibi K, Sozu T, Terashima M,  
38  
39 499 Michishita I, Investigators T (2013) C-reactive protein and future cardiovascular  
40  
41 500 events in statin-treated patients with angina pectoris: the extended TRUTH study. *J*  
42  
43 501 *Atheroscler Thromb* 20(9):717-25.  
44  
45  
46 502 [dataset]39. Lablanche JM, Leone A, Merkely B, Morais J, Alonso J, Santini M, Eha J,  
47  
48  
49 503 Demil N, Licour M, Tardif JC, investigators C (2010) Comparison of the efficacy of  
50  
51 504 rosuvastatin versus atorvastatin in reducing apolipoprotein B/apolipoprotein A-1 ratio  
52  
53 505 in patients with acute coronary syndrome: results of the CENTAURUS study. *Arch*  
54  
55  
56 506 *Cardiovasc Dis* 103(3):160-9.  
57  
58  
59  
60

- 1  
2  
3  
4 507 [dataset]40.Gibson CM, Pride YB, Hochberg CP, Sloan S, Sabatine MS, Cannon CP,  
5  
6 508 Group TS (2009) Effect of intensive statin therapy on clinical outcomes among  
7  
8  
9 509 patients undergoing percutaneous coronary intervention for acute coronary syndrome.  
10  
11 510 PCI-PROVE IT: A PROVE IT-TIMI 22 (Pravastatin or Atorvastatin Evaluation and  
12  
13  
14 511 Infection Therapy-Thrombolysis In Myocardial Infarction 22) Substudy. *J Am Coll*  
15  
16  
17 512 *Cardiol* 54(24):2290-5.
- 18  
19 513 [dataset]41.Han YL, Zhang ZL, Li Y, Wang SL, Jing QM, Wang ZL, Wang DM  
20  
21  
22 514 (2009) Comparison on long-term effects of atorvastatin or pravastatin combined with  
23  
24  
25 515 clopidogrel for patients undergoing coronary stenting: a randomized controlled trial.  
26  
27 516 *Zhonghua Yi Xue Za Zhi* 89(32):2240-4.
- 28  
29  
30 517 [dataset]42.Hiro T, Kimura T, Morimoto T, Miyauchi K, Nakagawa Y, Yamagishi M,  
31  
32  
33 518 Ozaki Y, Kimura K, Saito S, Yamaguchi T, Daida H, Matsuzaki M, Investigators J-A  
34  
35  
36 519 (2009) Effect of intensive statin therapy on regression of coronary atherosclerosis in  
37  
38  
39 520 patients with acute coronary syndrome: a multicenter randomized trial evaluated by  
40  
41  
42 521 volumetric intravascular ultrasound using pitavastatin versus atorvastatin (JAPAN-  
43  
44  
45 522 ACS [Japan assessment of pitavastatin and atorvastatin in acute coronary syndrome]  
46  
47  
48 523 study). *J Am Coll Cardiol* 54(4):293-302.
- 49  
50  
51 524 [dataset]43.Dohi T, Miyauchi K, Okazaki S, Yokoyama T, Yanagisawa N, Tamura H,  
52  
53  
54 525 Kojima T, Yokoyama K, Kurata T, Daida H (2009) Early intensive statin treatment  
55  
56  
57 526 for six months improves long-term clinical outcomes in patients with acute coronary  
58  
59  
60 527 syndrome (Extended-ESTABLISH trial): a follow-up study. *Atherosclerosis*  
528 210(2):497-502.

- 1  
2  
3  
4 529 [dataset]44.Toi T, Taguchi I, Yoneda S, Kageyama M, Kikuchi A, Tokura M, Kanaya  
5  
6 530 T, Abe S, Matsuda R, Kaneko N (2009) Early effect of lipid-lowering therapy with  
7  
8  
9 531 pitavastatin on regression of coronary atherosclerotic plaque. Comparison with  
10  
11 532 atorvastatin. *Circ J* 73(8):1466-72.
- 13  
14 533 [dataset]45.Xu K, Han YL, Jing QM, Wang SL, Ma YY, Luan B, Wang ZL, Wang  
15  
16 534 DM (2007) Lipid-modifying therapy in diabetic patients with high plasma non-high-  
17  
18 535 density lipoprotein cholesterol after percutaneous coronary intervention. *Exp Clin*  
19  
20  
21 536 *Cardiol* 12(1):48-50.
- 23  
24 537 [dataset]46.Bae JH, Bassenge E, Kim KY, Synn YC, Park KR, Schwemmer M (2004)  
25  
26 538 Effects of low-dose atorvastatin on vascular responses in patients undergoing  
27  
28 539 percutaneous coronary intervention with stenting. *J Cardiovasc Pharmacol Ther*  
29  
30  
31 540 9(3):185-92.
- 33  
34 541 [dataset]47.Serruys PW, de Feyter P, Macaya C, Kokott N, Puel J, Vrolix M, Branzi  
35  
36 542 A, Bertolami MC, Jackson G, Strauss B, Meier B, Lescol Intervention Prevention  
37  
38 543 Study I (2002) Fluvastatin for prevention of cardiac events following successful first  
39  
40 544 percutaneous coronary intervention: a randomized controlled trial. *JAMA*  
41  
42 545 287(24):3215-22.
- 44  
45 546 [dataset]48.Mulder HJ, Bal ET, Jukema JW, Zwinderman AH, Schalij MJ, van Boven  
46  
47 547 AJ, Brusckhe AV (2000) Pravastatin reduces restenosis two years after percutaneous  
48  
49 548 transluminal coronary angioplasty (REGRESS trial). *Am J Cardiol* 86(7):742-6.
- 51  
52 549 [dataset]49.Flaker GC, Warnica JW, Sacks FM, Moye LA, Davis BR, Rouleau JL,  
53  
54 550 Webel RR, Pfeffer MA, Braunwald E (1999) Pravastatin prevents clinical events in  
55  
56  
57  
58  
59  
60

1  
2  
3  
4 551 revascularized patients with average cholesterol concentrations. Cholesterol and  
5  
6 552 Recurrent Events CARE Investigators. *J Am Coll Cardiol* 34(1):106-12.  
7  
8  
9 553 [dataset]50.Bertrand ME, McFadden EP, Fruchart JC, Van Belle E, Commeau P,  
10  
11 554 Grollier G, Bassand JP, Machecourt J, Cassagnes J, Mossard JM, Vacheron A,  
12  
13 555 Castaigne A, Danchin N, Lablanche JM (1997) Effect of pravastatin on angiographic  
14  
15 556 restenosis after coronary balloon angioplasty. The PREDICT Trial Investigators.  
16  
17 557 Prevention of Restenosis by Elisor after Transluminal Coronary Angioplasty. *J Am*  
18  
19 558 *Coll Cardiol* 30(4):863-9.  
20  
21  
22 559 [dataset]51.O'Keefe JH, Jr., Stone GW, McCallister BD, Jr., Maddex C, Ligon R,  
23  
24 560 Kacich RL, Kahn J, Caverio PG, Hartzler GO, McCallister BD (1996) Lovastatin plus  
25  
26 561 probucol for prevention of restenosis after percutaneous transluminal coronary  
27  
28 562 angioplasty. *Am J Cardiol* 77(8):649-52.  
29  
30  
31 563 [dataset]52.Onaka H, Hirota Y, Kita Y, Tsuji R, Ishii K, Ishimura T, Kawamura K  
32  
33 564 (1994) The effect of pravastatin on prevention of restenosis after successful  
34  
35 565 percutaneous transluminal coronary angioplasty. *Jpn Circ J* 58(2):100-6.  
36  
37  
38 566 [dataset]53.Sahni R, Maniet AR, Voci G, Banka VS (1991) Prevention of restenosis  
39  
40 567 by lovastatin after successful coronary angioplasty. *Am Heart J* 121(6 Pt 1):1600-8.  
41  
42  
43 568 [dataset]54.Kita Y, Watanabe M, Kamon D, Ueda T, Soeda T, Okayama S, Ishigami  
44  
45 569 K, Kawata H, Horii M, Inoue F, Doi N, Okura H, Uemura S, Saito Y (2020) Effects  
46  
47 570 of Fatty Acid Therapy in Addition to Strong Statin on Coronary Plaques in Acute  
48  
49 571 Coronary Syndrome: An Optical Coherence Tomography Study. *J Am Heart Assoc*  
50  
51 572 9(16):e015593.  
52  
53  
54  
55  
56  
57  
58  
59  
60

- 1  
2  
3  
4 573 [dataset]55.Zhang BH, Yin F, Qiao YN, Guo SD (2022) Triglyceride and  
5  
6 574 Triglyceride-Rich Lipoproteins in Atherosclerosis. *Front Mol Biosci* 9:909151.  
7  
8  
9 575 [dataset]56. Bhatt DL, Steg PG, Miller M, Brinton EA, Jacobson TA, Ketchum SB,  
10  
11 576 Doyle RT, Jr., Juliano RA, Jiao L, Granowitz C, Tardif JC, Ballantyne CM,  
12  
13 577 Investigators R-I (2019) Cardiovascular Risk Reduction with Icosapent Ethyl for  
14  
15 578 Hypertriglyceridemia. *N Engl J Med* 380(1):11-22.  
16  
17  
18 579 [dataset]57.Strilchuk L, Tocci G, Fogacci F, Cicero AFG (2020) An overview of  
19  
20 580 rosuvastatin/ezetimibe association for the treatment of hypercholesterolemia and  
21  
22 581 mixed dyslipidemia. *Expert Opin Pharmacother* 21(5):531-9.  
23  
24  
25 582 [dataset]58.Mach F, Baigent C, Catapano AL, Koskinas KC, Casula M, Badimon L,  
26  
27 583 Chapman MJ, De Backer GG, Delgado V, Ference BA, Graham IM, Halliday A,  
28  
29 584 Landmesser U, Mihaylova B, Pedersen TR, Riccardi G, Richter DJ, Sabatine MS,  
30  
31 585 Taskinen MR, Tokgozoglul L, Wiklund O, Group ESCSD (2019) 2019 ESC/EAS  
32  
33 586 Guidelines for the management of dyslipidaemias: lipid modification to reduce  
34  
35 587 cardiovascular risk. *Eur Heart J* 41(1):111-88.  
36  
37  
38 588 [dataset]59.Ray KK, Del Prato S, Muller-Wieland D, Cariou B, Colhoun HM,  
39  
40 589 Tinahones FJ, Domenger C, Letierce A, Mandel J, Samuel R, Bujas-Bobanovic M,  
41  
42 590 Leiter LA (2019) Alirocumab therapy in individuals with type 2 diabetes mellitus and  
43  
44 591 atherosclerotic cardiovascular disease: analysis of the ODYSSEY DM-  
45  
46 592 DYSLIPIDEMIA and DM-INSULIN studies. *Cardiovasc Diabetol* 18(1):149.  
47  
48  
49 593 [dataset]60.Lin Y, Parco C, Karathanos A, Krieger T, Schulze V, Chernyak N, Icks A,  
50  
51 594 Kelm M, Brockmeyer M, Wolff G (2022) Clinical efficacy and safety outcomes of  
52  
53  
54  
55  
56  
57  
58  
59  
60



1  
2  
3  
4 595 bempedoic acid for LDL-C lowering therapy in patients at high cardiovascular risk: a  
5  
6 596 systematic review and meta-analysis. *BMJ Open* 12(2):e048893.

7  
8  
9 597 [dataset]61.Wang X, Wen D, Chen Y, Ma L, You C (2022) PCSK9 inhibitors for  
10  
11 598 secondary prevention in patients with cardiovascular diseases: a bayesian network  
12  
13 599 meta-analysis. *Cardiovasc Diabetol* 21(1):107.

14  
15  
16  
17 600 [dataset]62.Schmidt AF, Carter JL, Pearce LS, Wilkins JT, Overington JP, Hingorani  
18  
19 601 AD, Casas JP (2020) PCSK9 monoclonal antibodies for the primary and secondary  
20  
21 602 prevention of cardiovascular disease. *Cochrane Database Syst Rev* 10:CD011748.

22  
23  
24 603 [dataset]63.An SJ, Kim TJ, Yoon BW (2017) Epidemiology, Risk Factors, and  
25  
26 604 Clinical Features of Intracerebral Hemorrhage: An Update. *J Stroke* 19(1):3-10.

27  
28  
29 605 [dataset]64.Pasta A, Cremonini AL, Pisciotto L, Buscaglia A, Porto I, Barra F, Ferrero  
30  
31 606 S, Brunelli C, Rosa GM (2020) PCSK9 inhibitors for treating hypercholesterolemia.  
32  
33 607 *Expert Opin Pharmacother* 21(3):353-63.

34  
35  
36  
37 608 [dataset]65.Oesterle A, Laufs U, Liao JK (2017) Pleiotropic Effects of Statins on the  
38  
39 609 Cardiovascular System. *Circ Res* 120(1):229-43.

40  
41  
42  
43 610 [dataset]66.Yang T, Fu X, Fu P, Chen J, Xu C, Liu X, Niu T (2021) The value of  
44  
45 611 fragmented QRS in predicting the prognosis of chronic total occlusion patients with  
46  
47 612 myocardial infarction history undergoing percutaneous coronary intervention: A 24-  
48  
49 613 months follow-up study. *Clin Cardiol* 44(4):537-46.

50  
51  
52  
53 614 [dataset]67.Ndrepepa G, Holdenrieder S, Cassese S, Xhepa E, Fusaro M, Kastrati A  
54  
55 615 (2020) Hypocholesterolaemia and mortality in patients with coronary artery disease.  
56  
57 616 *Eur J Clin Invest* 50(2):e13194.

- 1  
2  
3  
4 617 [dataset]68.Sia CH, Zheng H, Ho AF, Bulluck H, Chong J, Foo D, Foo LL, Lim PZY,  
5  
6 618 Liew BW, Tan HC, Yeo TC, Chua TSJ, Chan MY, Hausenloy DJ (2020) The Lipid  
7  
8 619 Paradox is present in ST-elevation but not in non-ST-elevation myocardial infarction  
9  
10 620 patients: Insights from the Singapore Myocardial Infarction Registry. *Sci Rep*  
11  
12 621 10(1):6799.  
13  
14  
15  
16 622 [dataset]69.Sun H, Li Z, Song X, Liu H, Li Y, Hao Y, Teng T, Liu J, Liu J, Zhao D,  
17  
18 623 Zhou X, Yang Q, Investigators C-A (2021) Revisiting the lipid paradox in ST-  
19  
20 624 elevation myocardial infarction in the Chinese population: findings from the CCC-  
21  
22 625 ACS project. *Eur Heart J Acute Cardiovasc Care* 10(9):978-87.  
23  
24  
25  
26 626 [dataset]70.Guedeney P, Claessen BE, Kalkman DN, Aquino M, Sorrentino S,  
27  
28 627 Giustino G, Farhan S, Vogel B, Sartori S, Montalescot G, Sweeny J, Kovacic JC,  
29  
30 628 Krishnan P, Barman N, Dangas G, Kini A, Baber U, Sharma S, Mehran R (2019)  
31  
32 629 Residual Inflammatory Risk in Patients With Low LDL Cholesterol Levels  
33  
34 630 Undergoing Percutaneous Coronary Intervention. *J Am Coll Cardiol* 73(19):2401-9.  
35  
36  
37 631 [dataset]71.Razzouk L, Muntner P, Bansilal S, Kini AS, Aneja A, Mozes J, Ivan O,  
38  
39 632 Jakkula M, Sharma S, Farkouh ME (2009) C-reactive protein predicts long-term  
40  
41 633 mortality independently of low-density lipoprotein cholesterol in patients undergoing  
42  
43 634 percutaneous coronary intervention. *Am Heart J* 158(2):277-83.  
44  
45  
46 635 [dataset]72.Abbate A, Biondi-Zoccai GG, Appleton DL, Erne P, Schoenenberger  
47  
48 636 AW, Lipinski MJ, Agostoni P, Sheiban I, Vetrovec GW (2008) Survival and cardiac  
49  
50 637 remodeling benefits in patients undergoing late percutaneous coronary intervention of  
51  
52 638 the infarct-related artery: evidence from a meta-analysis of randomized controlled  
53  
54  
55  
56  
57  
58  
59  
60

1  
2  
3  
4 639 trials. J Am Coll Cardiol 51(9):956-64.  
5

6 640 **Figure 1.** Flowchart of the study selection process for eligible studies  
7

8  
9 641 **Figure 2.** Methodological quality assessment of included studies  
10

11 642 **Figure 3.** Network plots of comparisons for major outcomes included in the analyses.  
12

13  
14 643 A: dichotomous results of MACE based on specific types of statins; B: dichotomous  
15  
16 644 results of MACE based on taking statins as a whole; C: hazard ratio results of MACE  
17  
18 645 based on specific types of statins; D: hazard ratio results of MACE based on taking  
19  
20 646 statins as a whole; E: dichotomous results of mortality based on specific types of  
21  
22 647 statins; F: dichotomous results of mortality based on taking statins as a whole.  
23  
24  
25

26  
27 648 **Figure 4.** Forest plots of lipid-lowering therapy compare to control for outcomes in  
28

29  
30 649 network meta-analysis with SUCRA ranking results. A: dichotomous results of  
31  
32 650 MACE based on specific types of statins; B: dichotomous results of MACE based on  
33  
34 651 taking statins as a whole; C: hazard ratio results of MACE based on specific types of  
35  
36 652 statins; D: hazard ratio results of MACE based on taking statins as a whole; E:  
37  
38 653 dichotomous results of mortality based on specific types of statins; F: dichotomous  
39  
40 654 results of mortality based on taking statins as a whole.  
41  
42  
43  
44

45 655 **Figure 5.** The comparison-adjusted funnel plot for assessing all main outcomes. A:  
46

47  
48 656 dichotomous results of MACE based on specific types of statins; B: dichotomous  
49  
50 657 results of MACE based on taking statins as a whole; C: dichotomous results of  
51  
52 658 mortality based on specific types of statins; D: dichotomous results of mortality based  
53  
54 659 on taking statins as a whole.  
55  
56  
57

58 660  
59  
60

1  
2  
3  
4 661  
5  
6  
7 662  
8  
9 663  
10  
11  
12 664  
13  
14  
15 665  
16  
17 666  
18  
19  
20 667  
21  
22 668  
23  
24  
25 669  
26  
27 670  
28  
29  
30 671  
31  
32  
33 672  
34  
35 673  
36  
37  
38 674  
39  
40 675  
41  
42  
43 676  
44  
45  
46 677  
47  
48 678  
49  
50  
51 679  
52  
53 680  
54  
55  
56 681  
57  
58  
59 682  
60

For peer review only

1  
2  
3  
4 683  
5  
6

7 **684 Authors and Afliations**

8  
9 685 Chang-Jiang Deng, Ju Yan, Ying-Ying Zheng, Ting-Ting Wu, Ying Pan, Xian-Geng

10  
11 686 Hou, Si-Fan Wang, Subinur·Sirajidin, Mikereyi·Sirajidin, Xiang Xie

12  
13  
14 687 Chang-Jiang Deng Xian-Geng Hou

15  
16 688 1187229853@qq.com 380138554@qq.com

17  
18 689 Ju Yan Si-Fan Wang

19  
20 690 yyjj2017@163.com 562654119@qq.com

21  
22 691 Ying-Ying Zheng Subinur·Sirajidin

23  
24 692 zhengying527@163.com 496568064@qq.com

25  
26 693 Ting-TingWu Mikereyi·Aimaitijiang

27  
28 694 1255723526@qq.com 3195676352@qq.com

29  
30 695 Ying Pan Xiang Xie

31  
32 696 2475854195@qq.com xiangxie999@sina.com

33  
34 697 Department of Cardiology, The First Affiliated Hospital of Xinjiang Medical

35  
36 698 University, Urumqi, 830011, P.R. China.  
37  
38  
39  
40  
41  
42  
43  
44  
45  
46  
47  
48  
49  
50  
51  
52  
53  
54  
55  
56  
57  
58  
59  
60

**PRISMA 2020 flow diagram for new systematic reviews which included searches of databases and registers only**

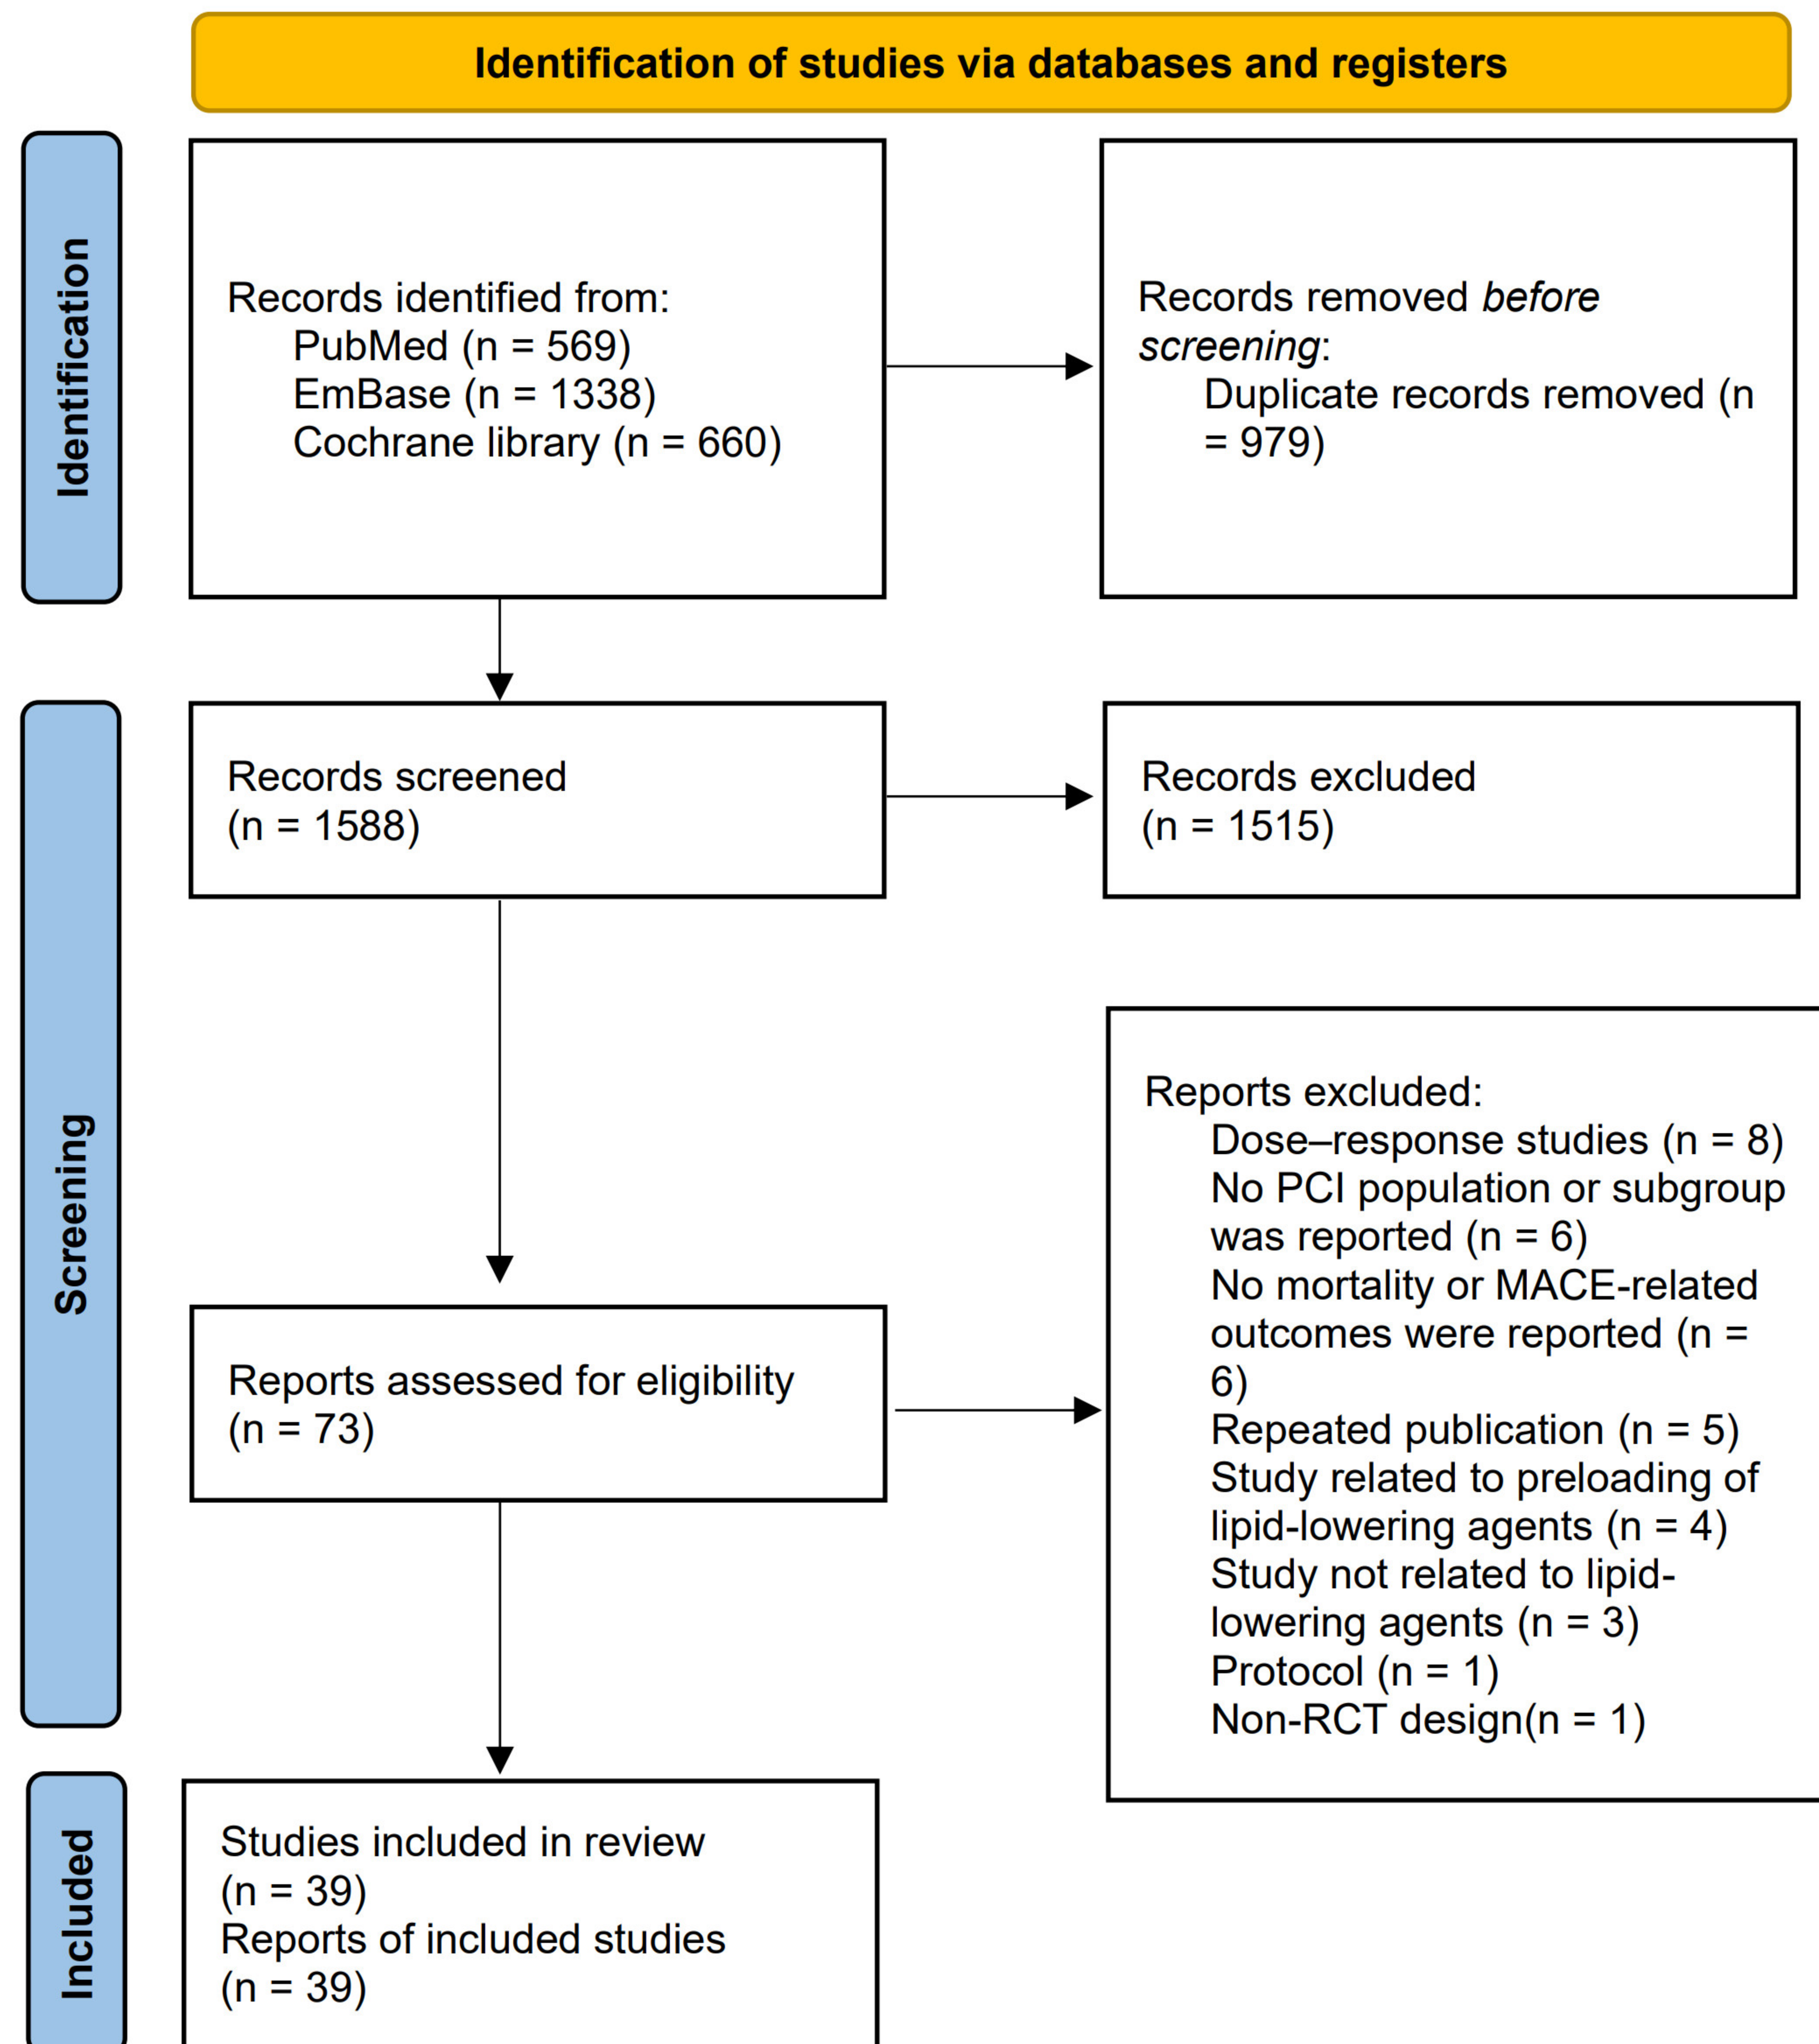

\*Consider, if feasible to do so, reporting the number of records identified from each database or register searched (rather than the total number across all databases/registers).

\*\*If automation tools were used, indicate how many records were excluded by a human and how many were excluded by automation tools.

From: Page MJ, McKenzie JE, Bossuyt PM, Boutron I, Hoffmann TC, Mulrow CD, et al. The PRISMA 2020 statement: an updated guideline for reporting systematic reviews. *BMJ* 2021;372:n71. doi: 10.1136/bmj.n71

For more information, visit: <http://www.prisma-statement.org/>

1  
2  
3  
4  
5  
6  
7  
8  
9  
10  
11  
12  
13  
14  
15  
16  
17  
18  
19  
20  
21  
22  
23  
24  
25  
26  
27  
28  
29  
30  
31  
32  
33  
34  
35  
36  
37  
38  
39  
40  
41  
42  
43  
44  
45  
46  
47  
48  
49  
50  
51  
52  
53  
54  
55  
56  
57  
58  
59  
60

|                            | Random sequence generation (selection bias) | Allocation concealment (selection bias) | Blinding of participants and personnel (performance bias) | Blinding of outcome assessment (detection bias) | Incomplete outcome data (attrition bias) | Selective reporting (reporting bias) | Other bias |
|----------------------------|---------------------------------------------|-----------------------------------------|-----------------------------------------------------------|-------------------------------------------------|------------------------------------------|--------------------------------------|------------|
| Bae JH 2004                | ?                                           | ?                                       | -                                                         | -                                               | +                                        | ?                                    | +          |
| C. Michael Gibson 2009     | +                                           | +                                       | +                                                         | +                                               | +                                        | +                                    | +          |
| Christopher P Cannon 2015  | +                                           | +                                       | +                                                         | +                                               | +                                        | +                                    | +          |
| Deng YF 2021               | ?                                           | ?                                       | -                                                         | -                                               | +                                        | +                                    | +          |
| Eui Im 2017                | +                                           | +                                       | -                                                         | +                                               | +                                        | +                                    | +          |
| Greg C. Flaker 1999        | +                                           | +                                       | +                                                         | +                                               | +                                        | +                                    | +          |
| Hagiwara N 2017            | +                                           | ?                                       | -                                                         | +                                               | +                                        | +                                    | +          |
| Han J.G.H. Mulder 2000     | +                                           | +                                       | +                                                         | +                                               | +                                        | +                                    | +          |
| Han Yaling 2009            | +                                           | +                                       | -                                                         | -                                               | +                                        | +                                    | +          |
| Haruhiko Onaka 1994        | ?                                           | ?                                       | -                                                         | -                                               | +                                        | +                                    | +          |
| Hiroiyuki Takano 2013      | +                                           | +                                       | -                                                         | +                                               | +                                        | +                                    | +          |
| Jean-Marc Lablanche 2010   | +                                           | +                                       | +                                                         | +                                               | +                                        | +                                    | +          |
| J Guo 2017                 | +                                           | +                                       | -                                                         | -                                               | +                                        | ?                                    | +          |
| J H O'Keefe Jr 1996        | +                                           | +                                       | +                                                         | +                                               | +                                        | +                                    | +          |
| Kazumasa Nosaka 2016       | +                                           | ?                                       | -                                                         | +                                               | +                                        | +                                    | +          |
| Kenichi Tsujita 2015       | +                                           | +                                       | -                                                         | +                                               | +                                        | +                                    | +          |
| Kensuke Matsushita 2016    | ?                                           | ?                                       | -                                                         | -                                               | +                                        | +                                    | +          |
| Kiyoshi Hibi 2018          | +                                           | +                                       | -                                                         | +                                               | +                                        | +                                    | +          |
| Lorenz Räber 2022          | +                                           | +                                       | +                                                         | +                                               | +                                        | +                                    | +          |
| Mario Leoncin 2014         | +                                           | ?                                       | -                                                         | -                                               | +                                        | +                                    | +          |
| MICHEL E. BERTRAND 1997    | +                                           | +                                       | +                                                         | +                                               | +                                        | +                                    | +          |
| Patrick W J C Serruys 2002 | +                                           | +                                       | +                                                         | +                                               | +                                        | +                                    | +          |
| Peterson, B. E. 2022       | +                                           | +                                       | +                                                         | +                                               | +                                        | +                                    | +          |
| Rakesh Sahni 1991          | ?                                           | ?                                       | -                                                         | -                                               | +                                        | +                                    | +          |
| Remo H.M. Furtado 2022     | +                                           | +                                       | ?                                                         | +                                               | +                                        | +                                    | +          |
| Stephen J. Nicholls 2015   | +                                           | +                                       | +                                                         | +                                               | +                                        | +                                    | +          |
| Sun C 2021                 | +                                           | ?                                       | -                                                         | -                                               | +                                        | ?                                    | +          |
| Takafumi Hiro 2009         | +                                           | +                                       | -                                                         | +                                               | +                                        | +                                    | +          |
| Tomoaki Okada 2022         | +                                           | +                                       | +                                                         | ?                                               | +                                        | +                                    | +          |
| Tomotaka Dohi 2009         | +                                           | ?                                       | -                                                         | -                                               | +                                        | +                                    | +          |
| Toru Toi 2009              | ?                                           | +                                       | -                                                         | ?                                               | +                                        | ?                                    | +          |
| Tsuyoshi Nozue 2013        | +                                           | +                                       | -                                                         | -                                               | +                                        | ?                                    | +          |
| Wang YB 2017               | +                                           | ?                                       | -                                                         | -                                               | +                                        | +                                    | +          |
| Watanabe T 2017            | +                                           | ?                                       | -                                                         | -                                               | +                                        | +                                    | +          |
| Weifeng He 2020            | +                                           | +                                       | ?                                                         | ?                                               | +                                        | +                                    | +          |
| Xu Kai 2007                | ?                                           | ?                                       | -                                                         | -                                               | +                                        | +                                    | +          |
| Yan Hao 2022               | ?                                           | ?                                       | -                                                         | -                                               | +                                        | +                                    | +          |
| Zhang JR 2015              | +                                           | ?                                       | -                                                         | -                                               | +                                        | ?                                    | +          |
| Zhi Liu 2017               | +                                           | ?                                       | -                                                         | -                                               | +                                        | +                                    | ?          |

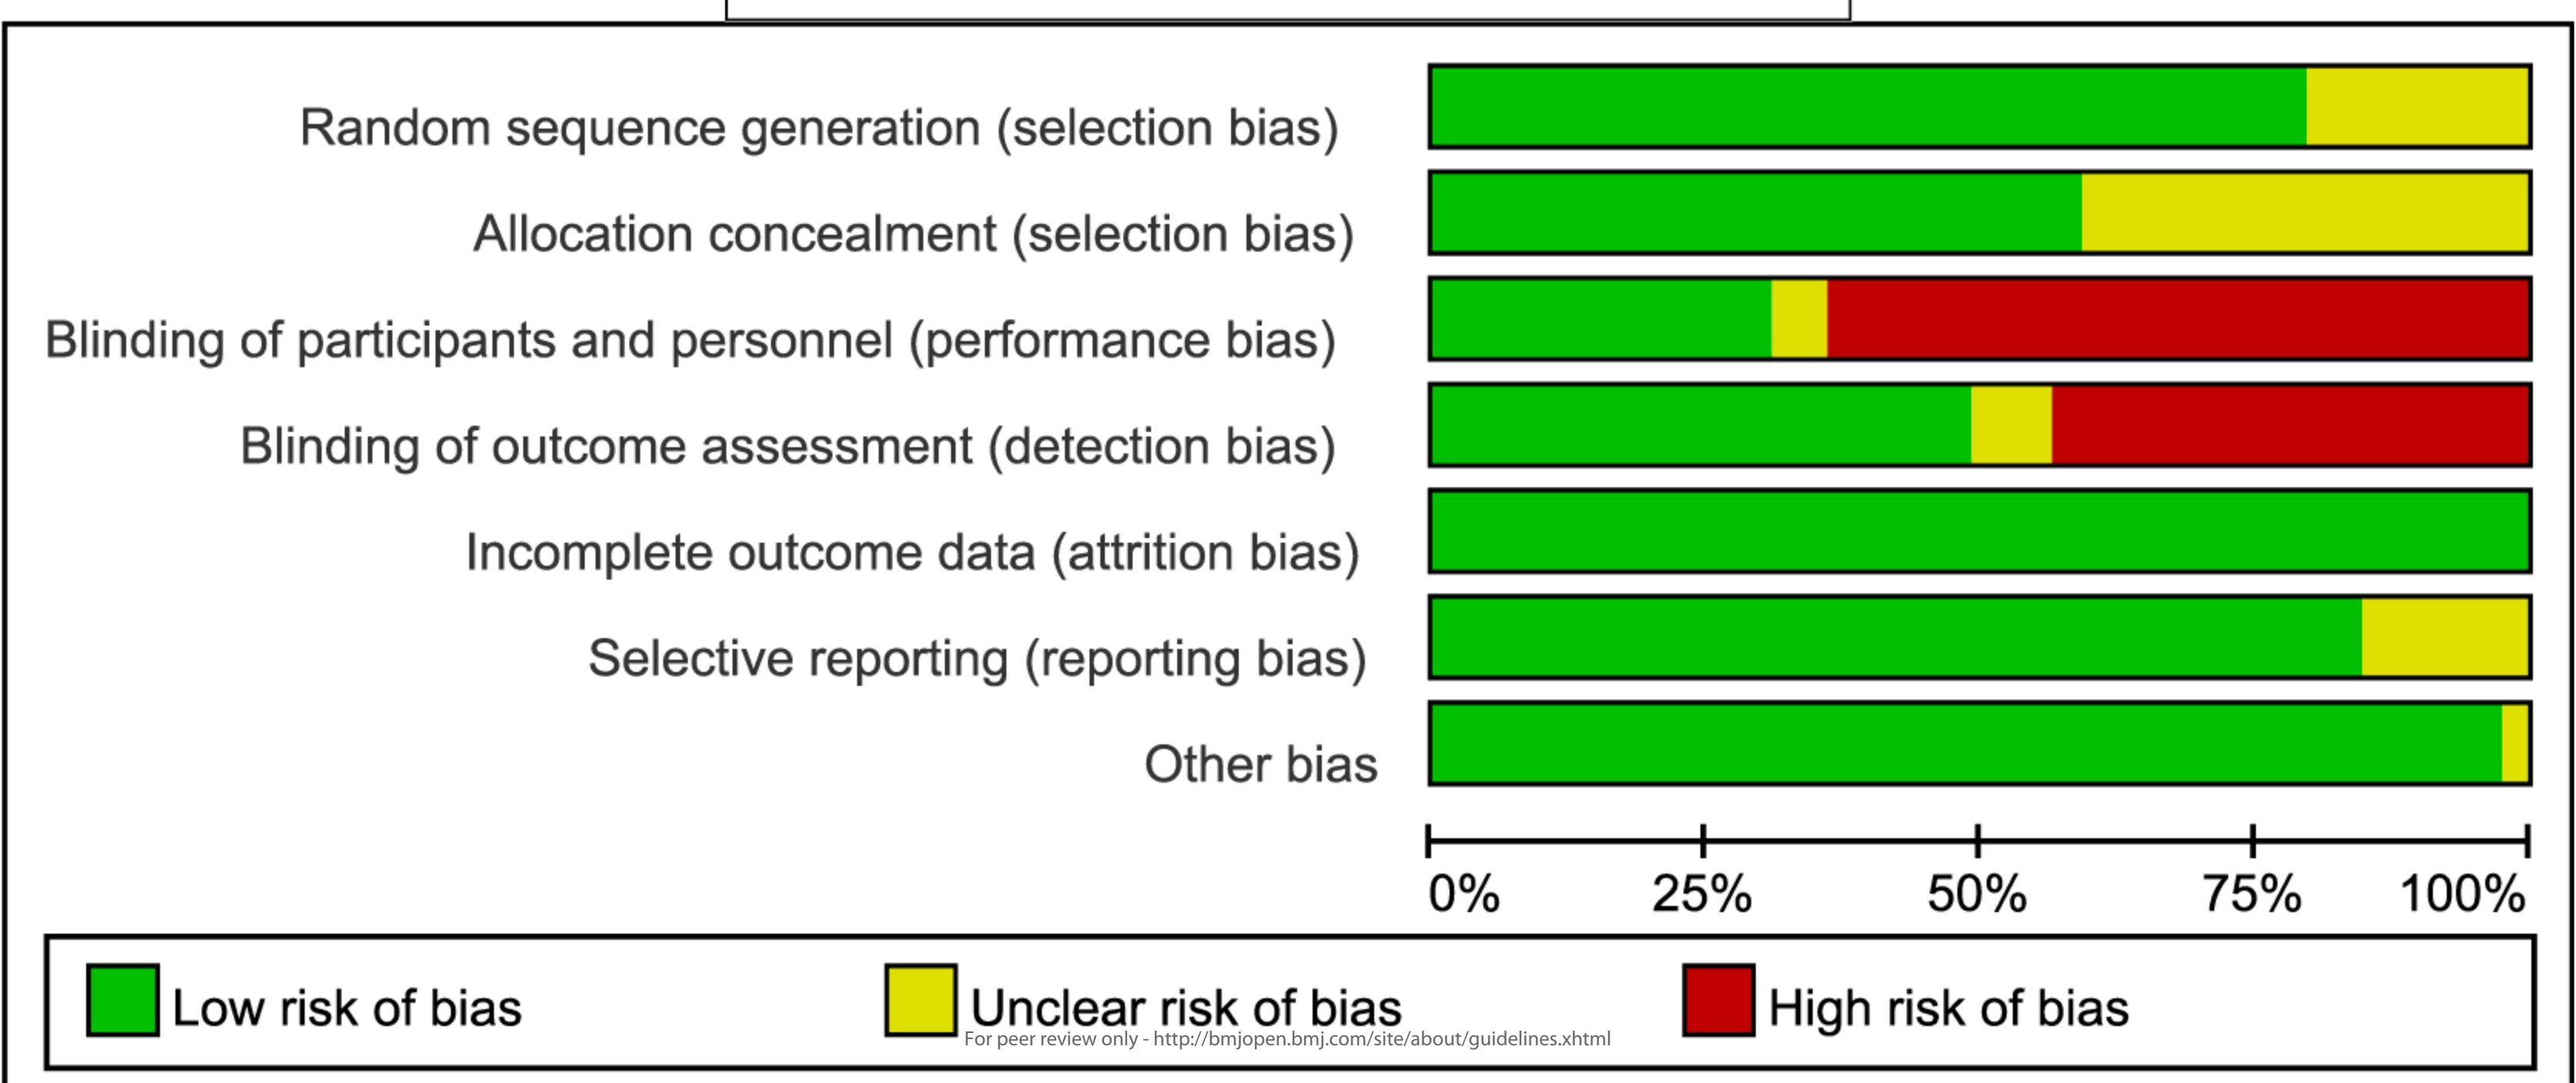

1  
2  
3  
4  
5  
6  
7  
8  
9  
10  
11  
12  
13  
14  
15  
16  
17  
18  
19  
20  
21  
22  
23  
24  
25  
26  
27  
28  
29  
30  
31  
32  
33  
34  
35  
36  
37  
38  
39  
40  
41  
42  
43  
44  
45  
46  
47  
48  
49  
50  
51  
52  
53  
54  
55  
56  
57  
58  
59  
60

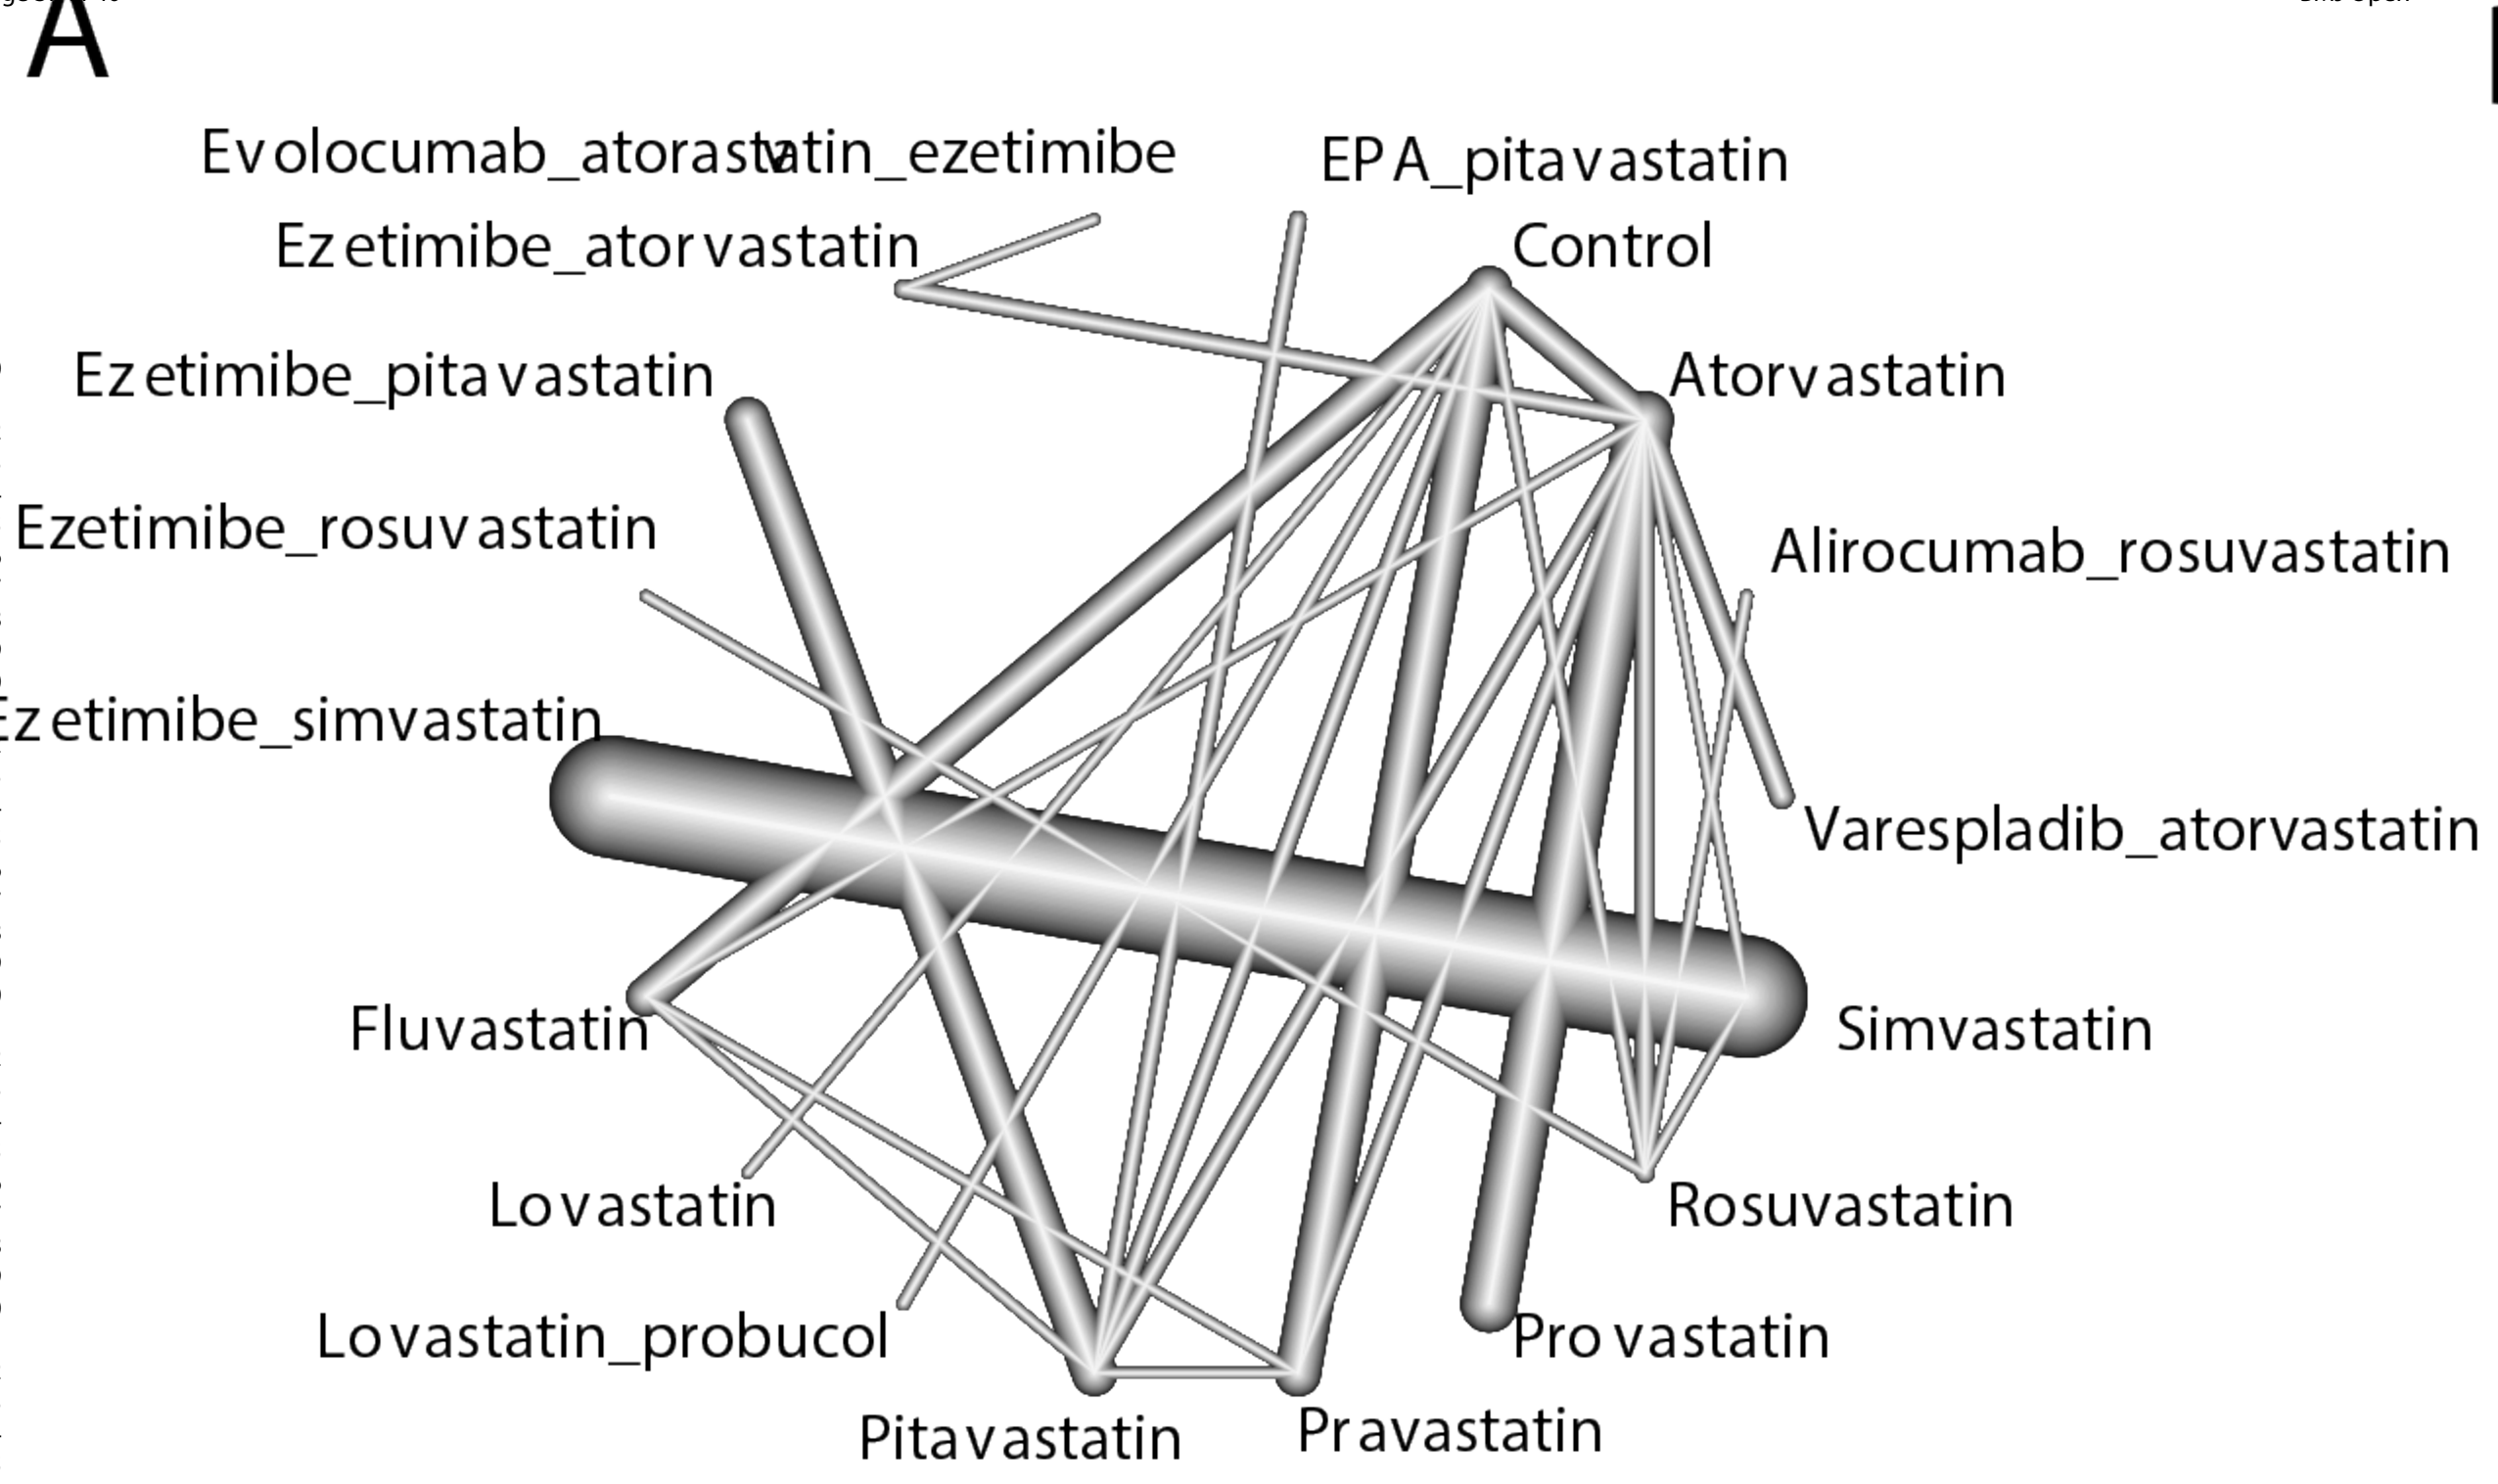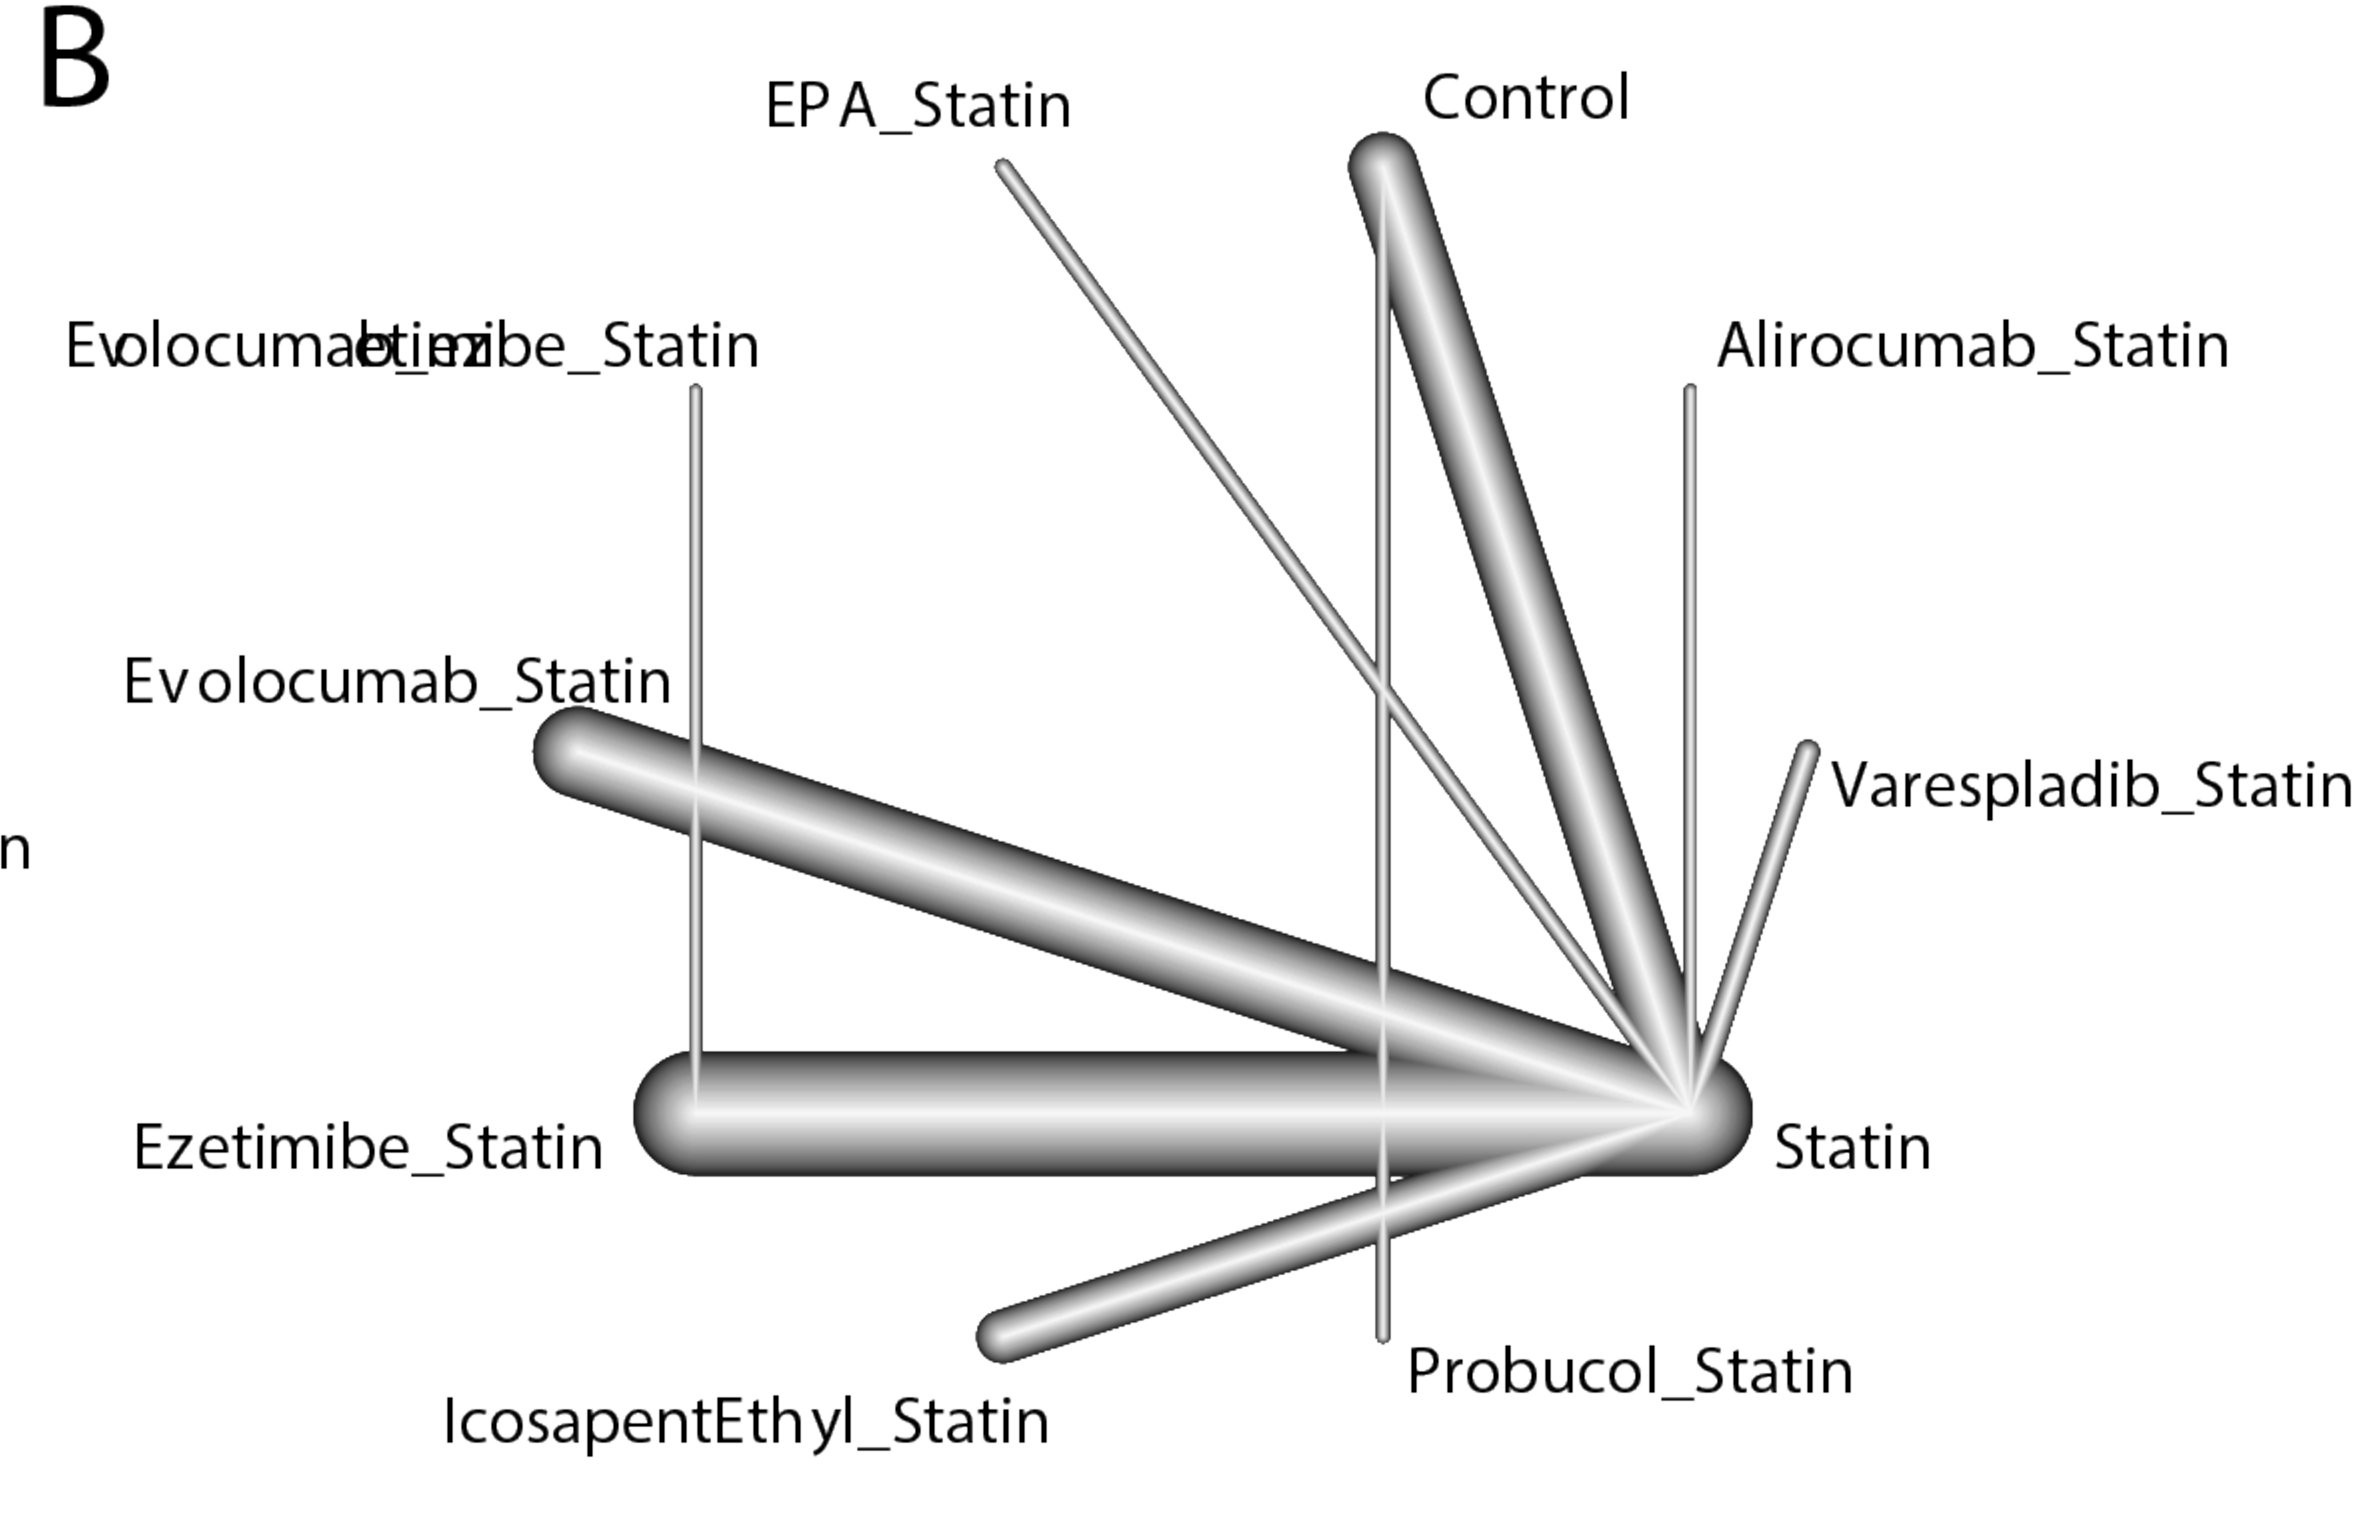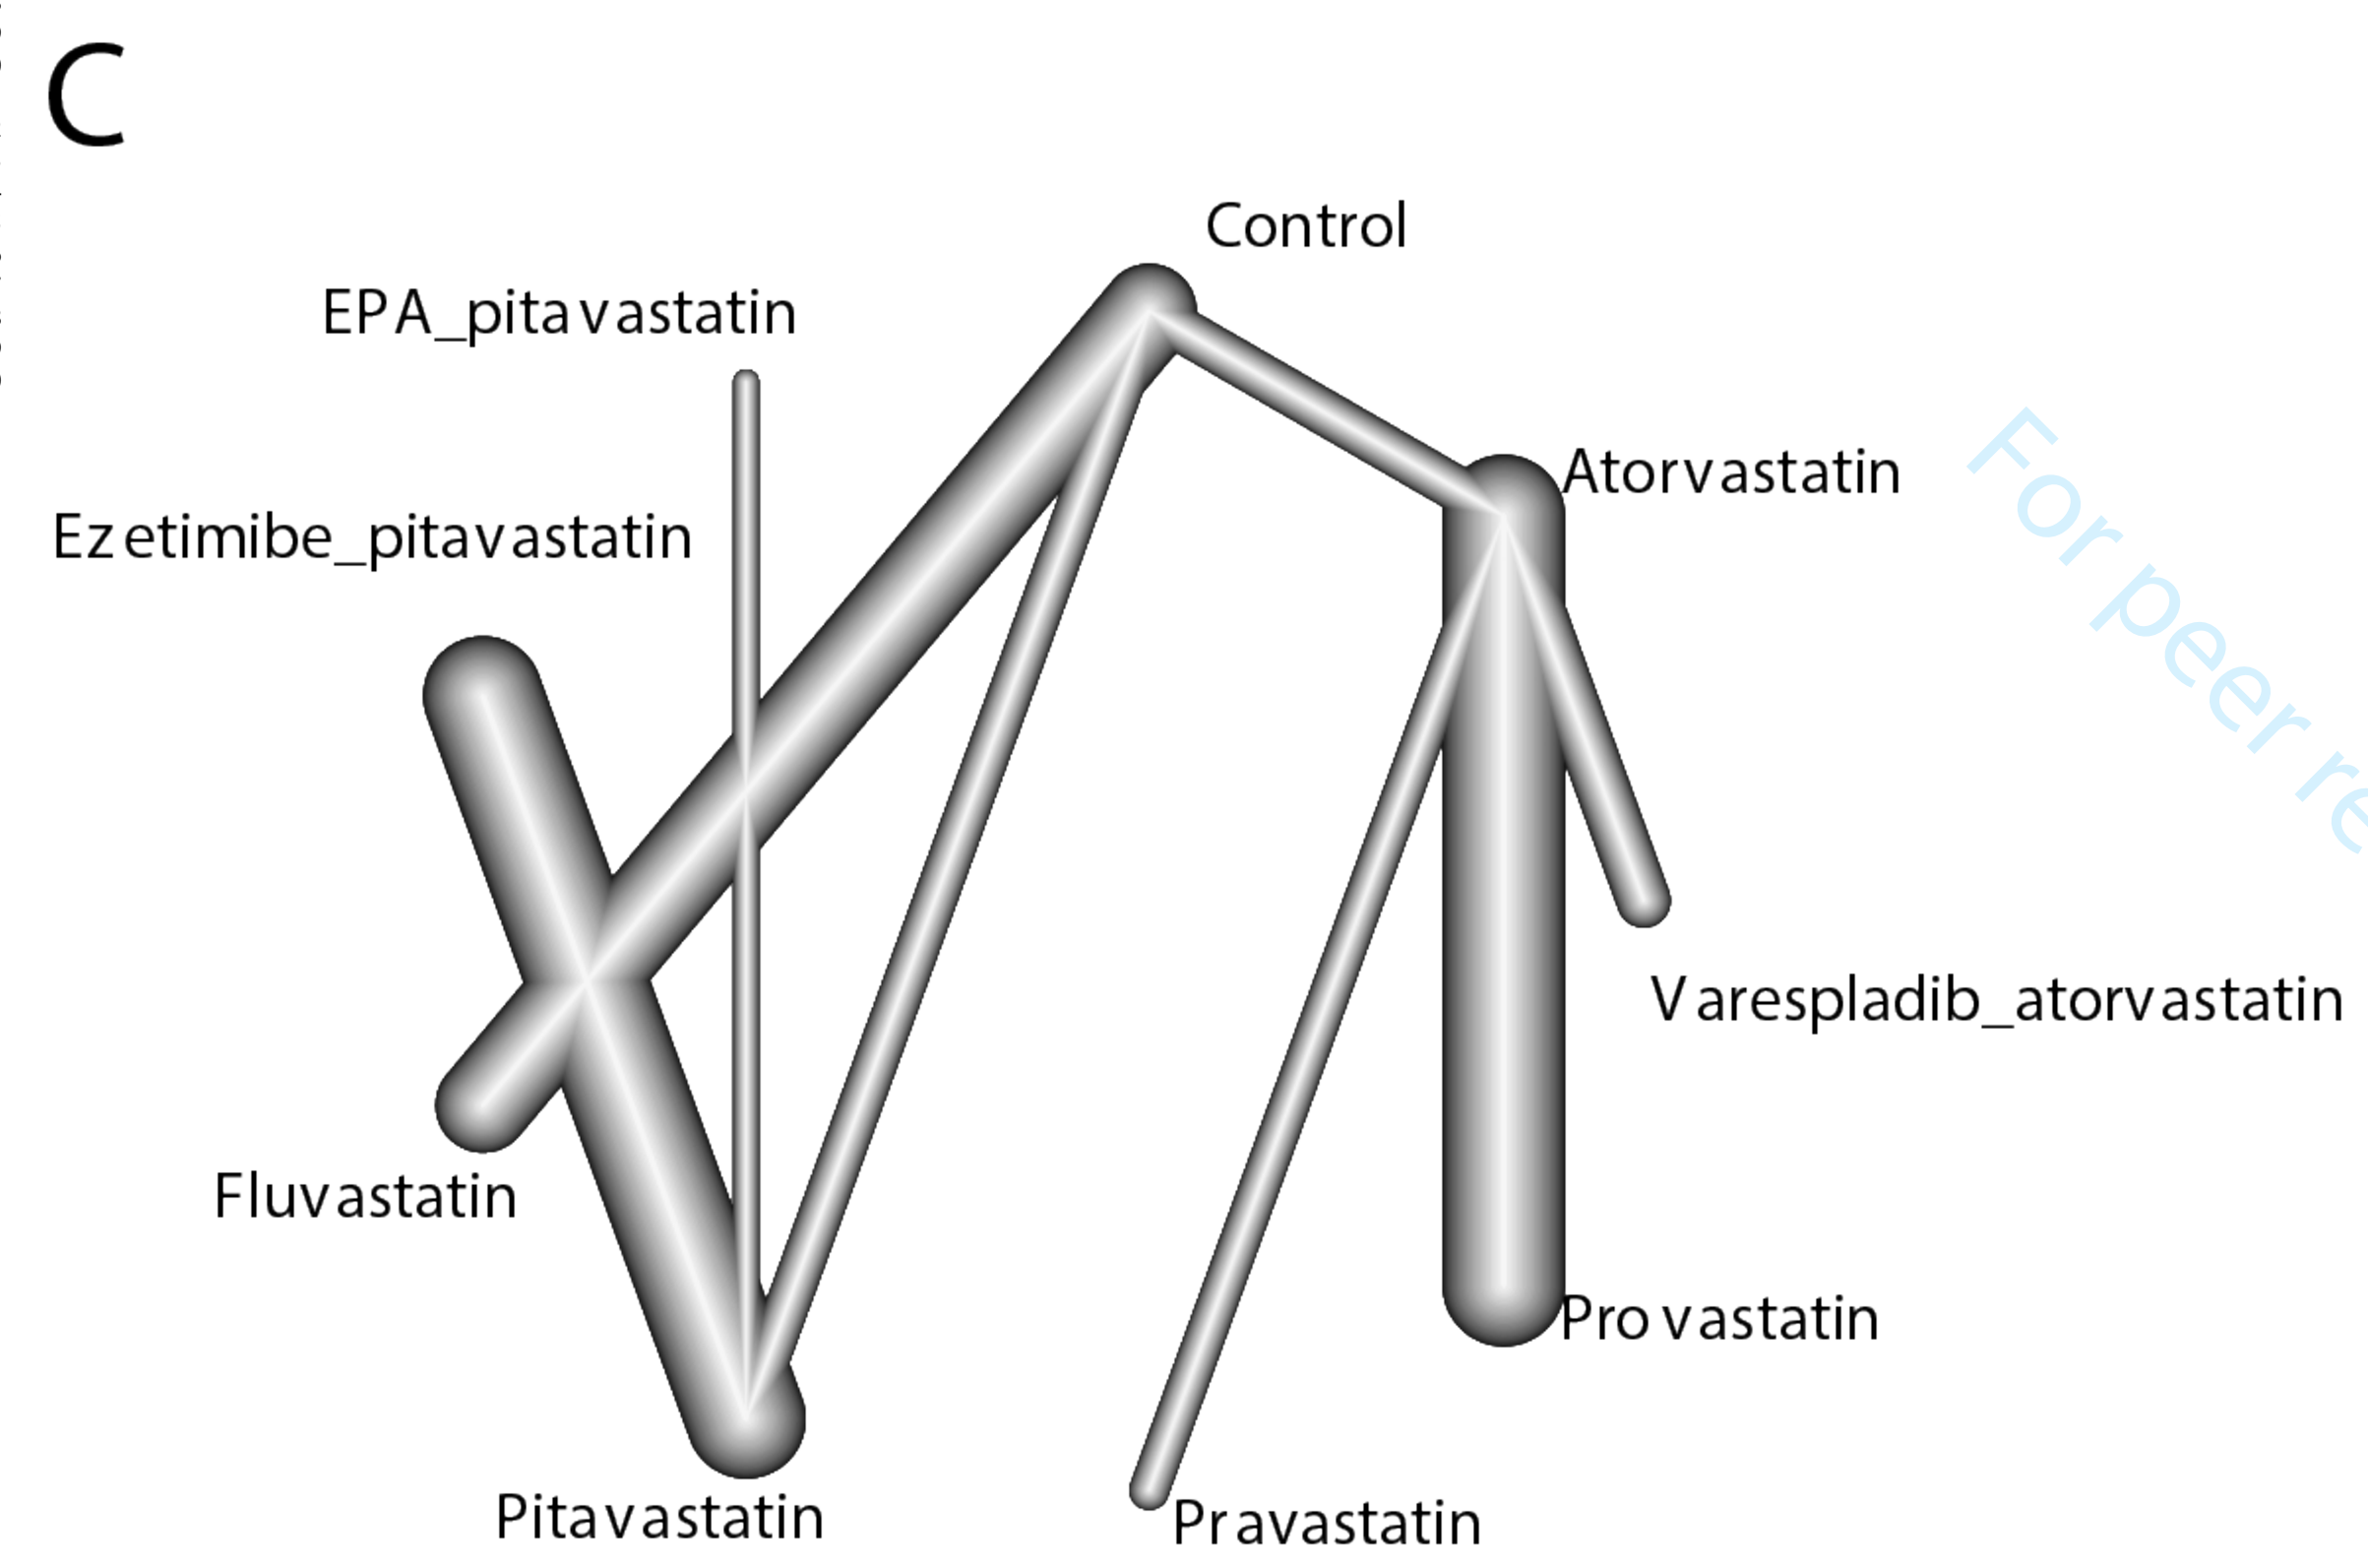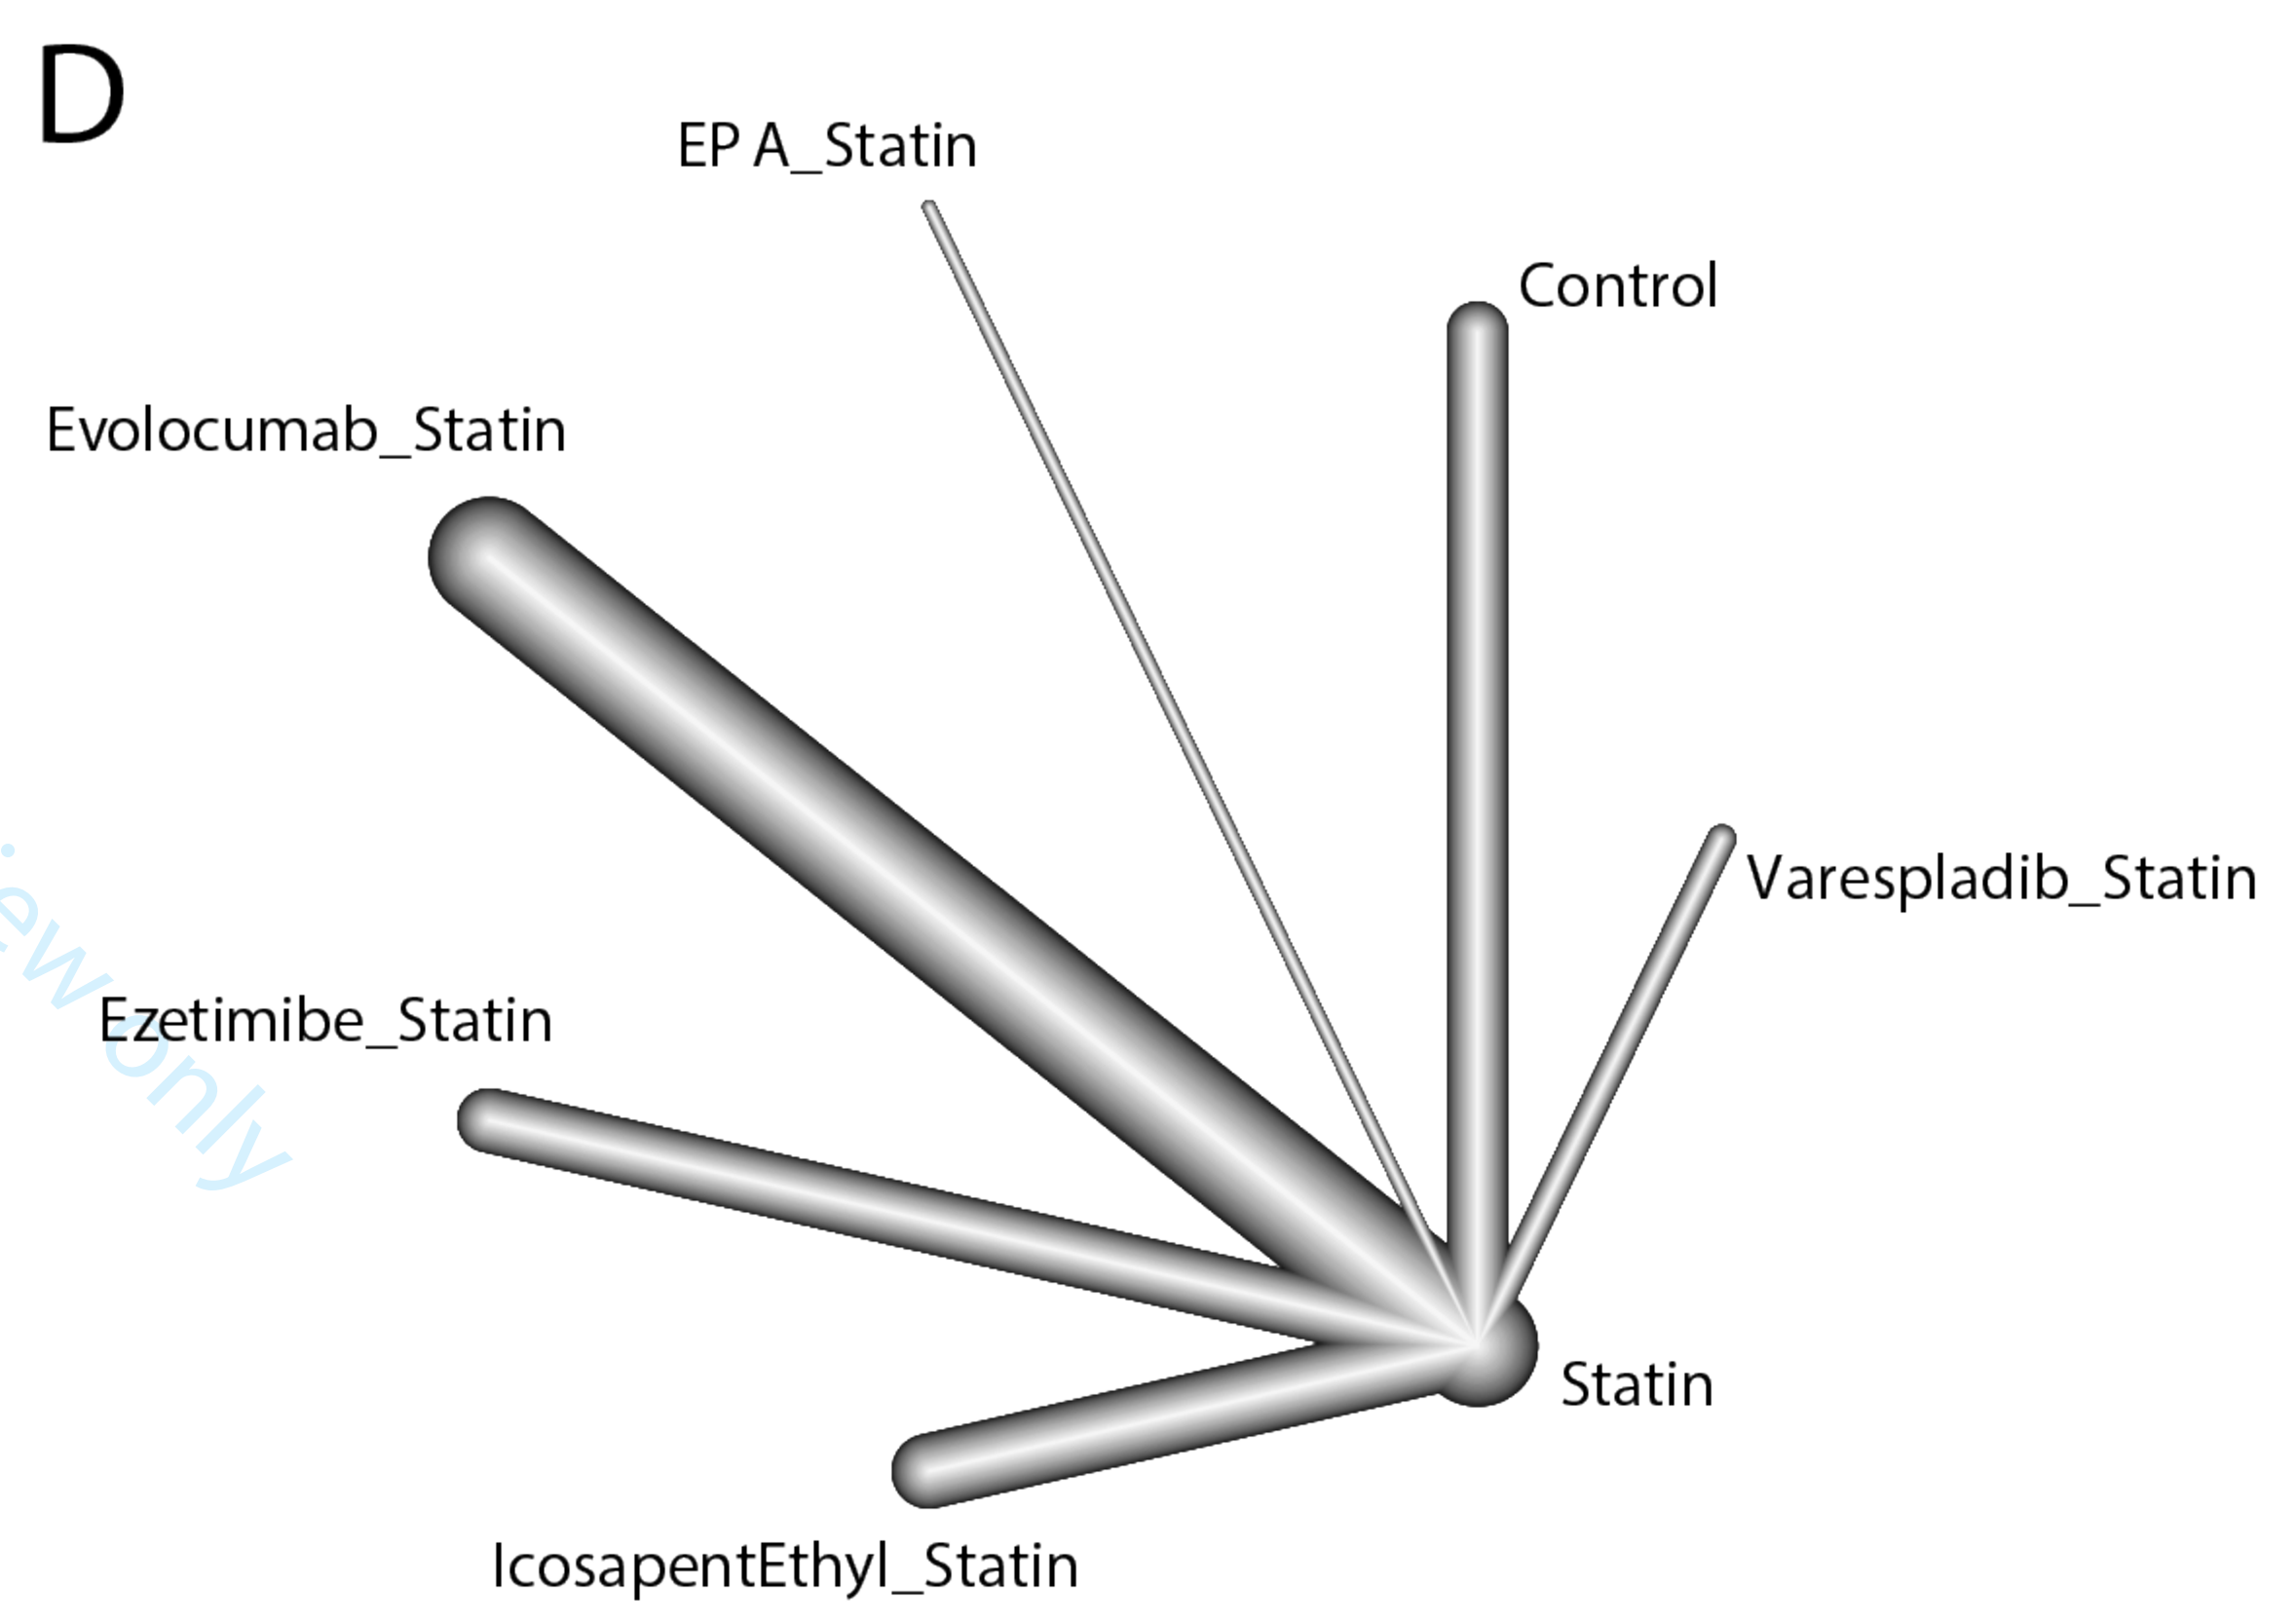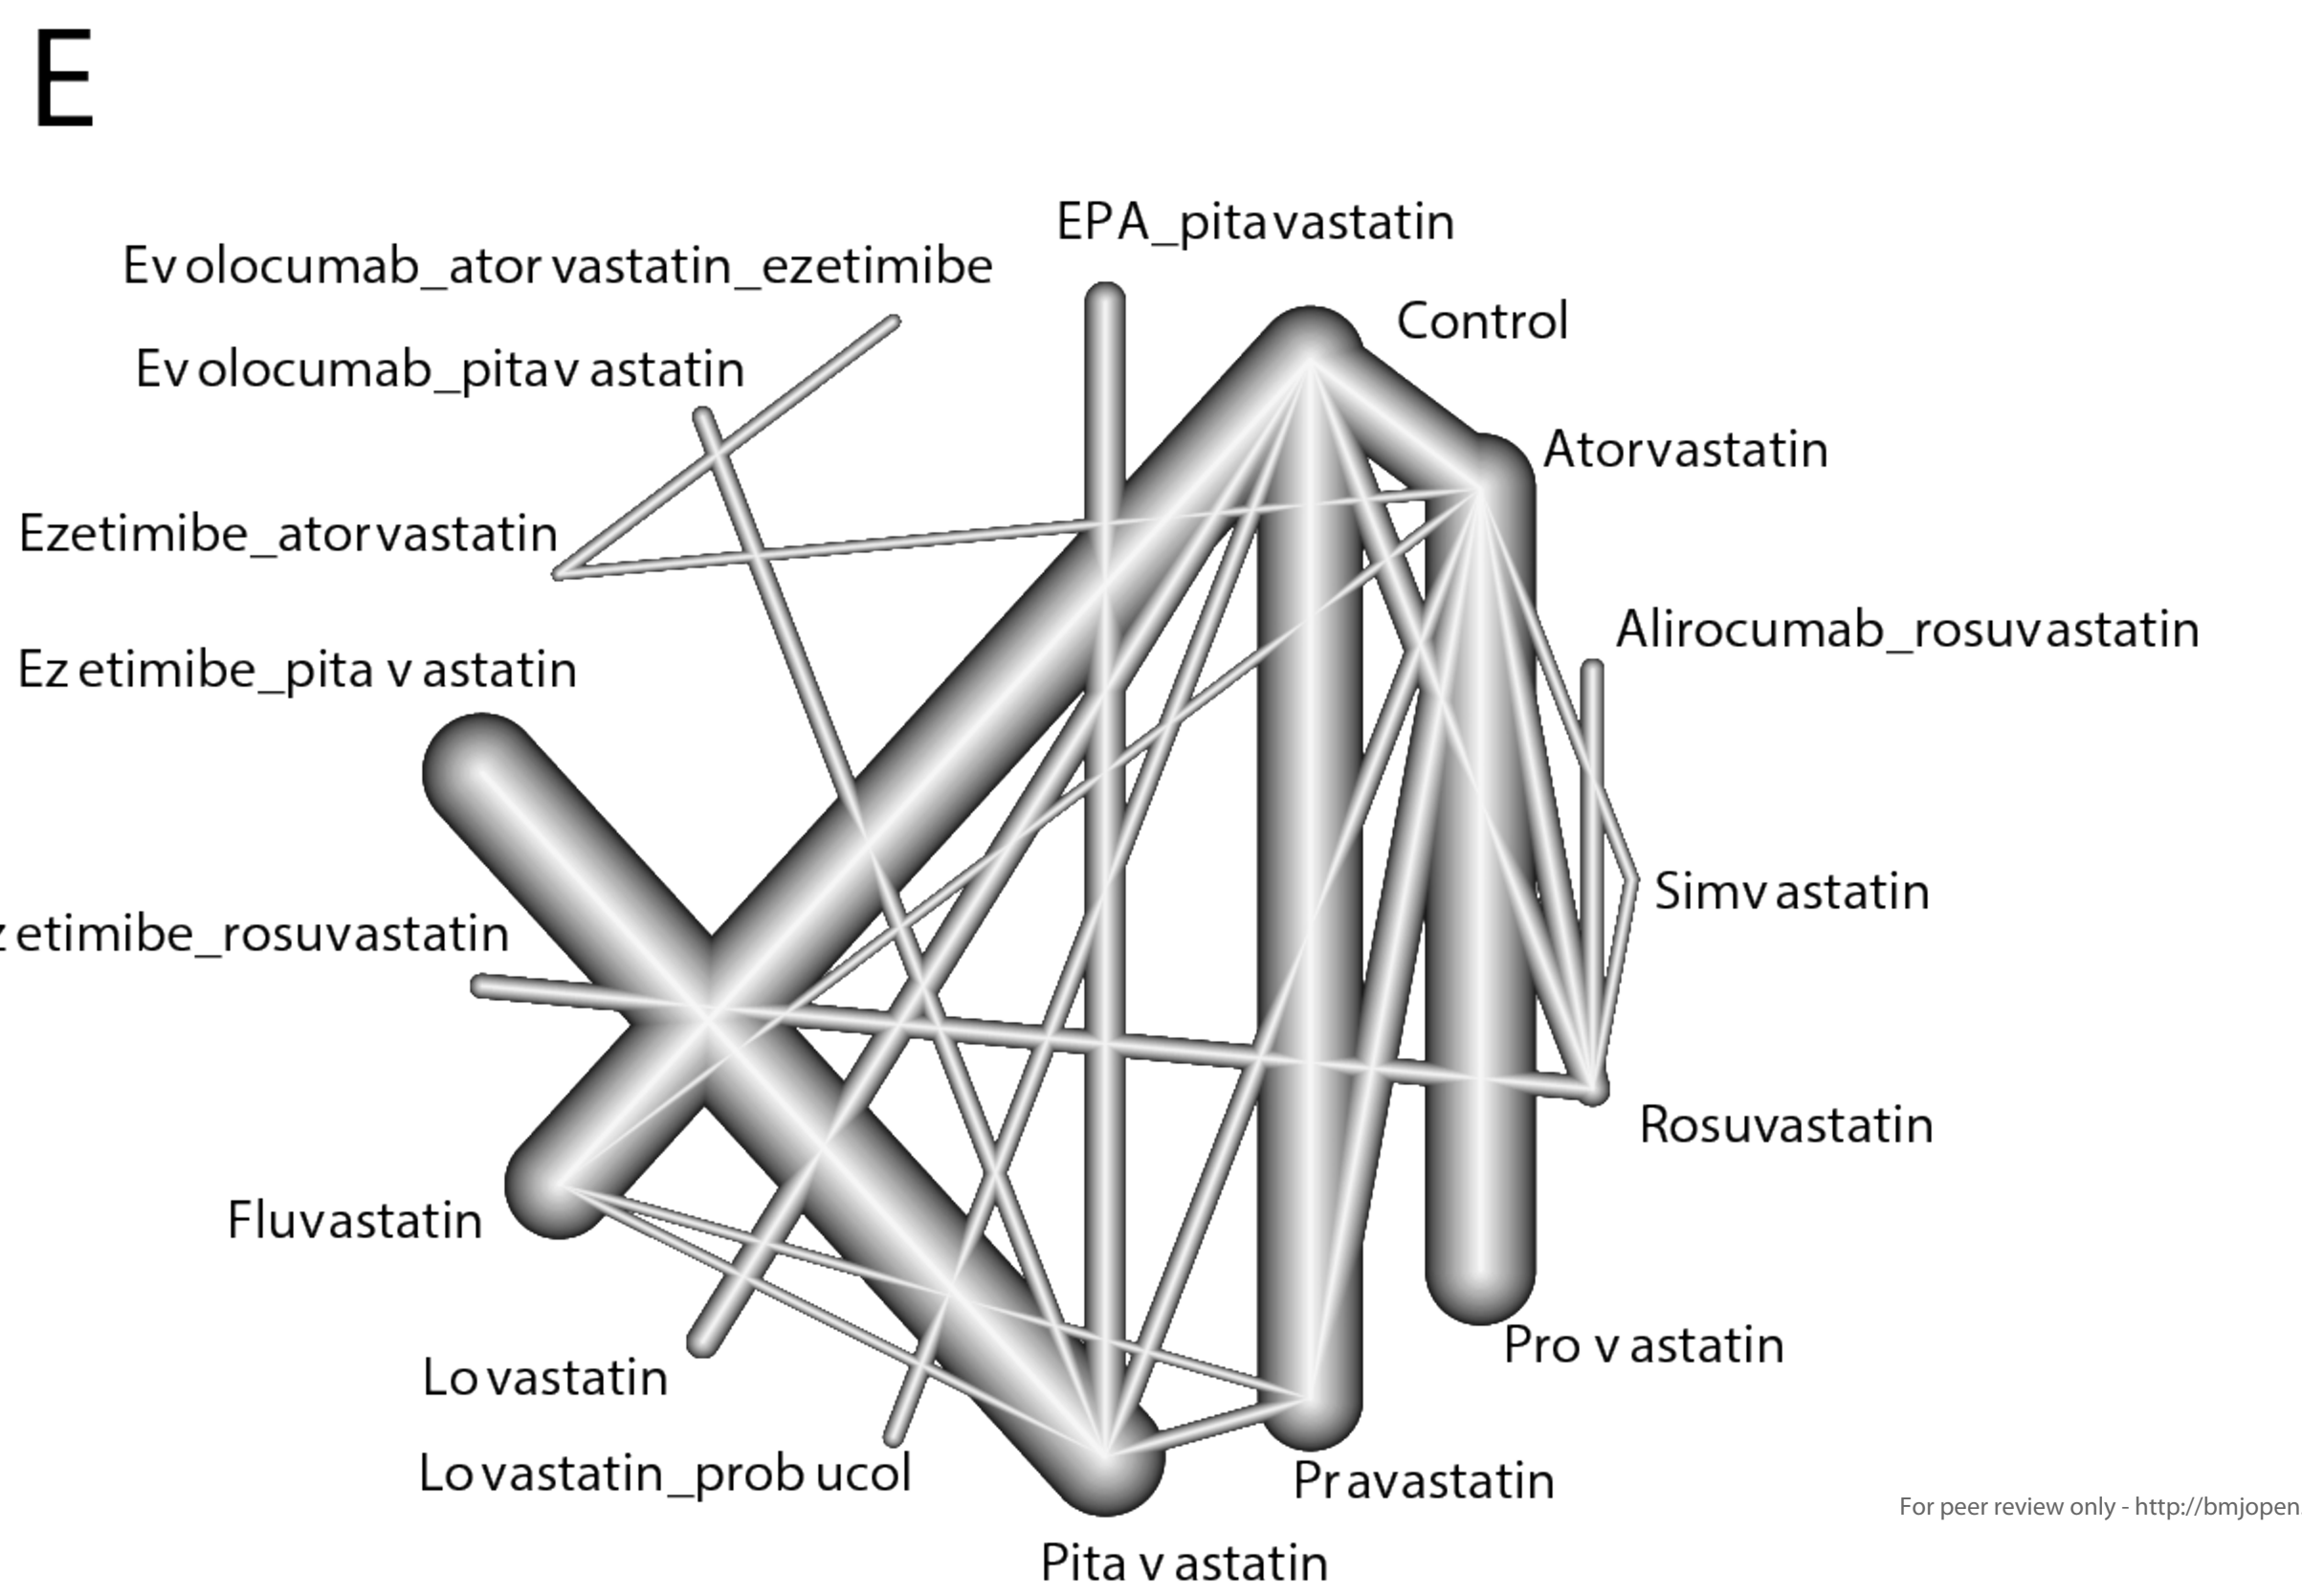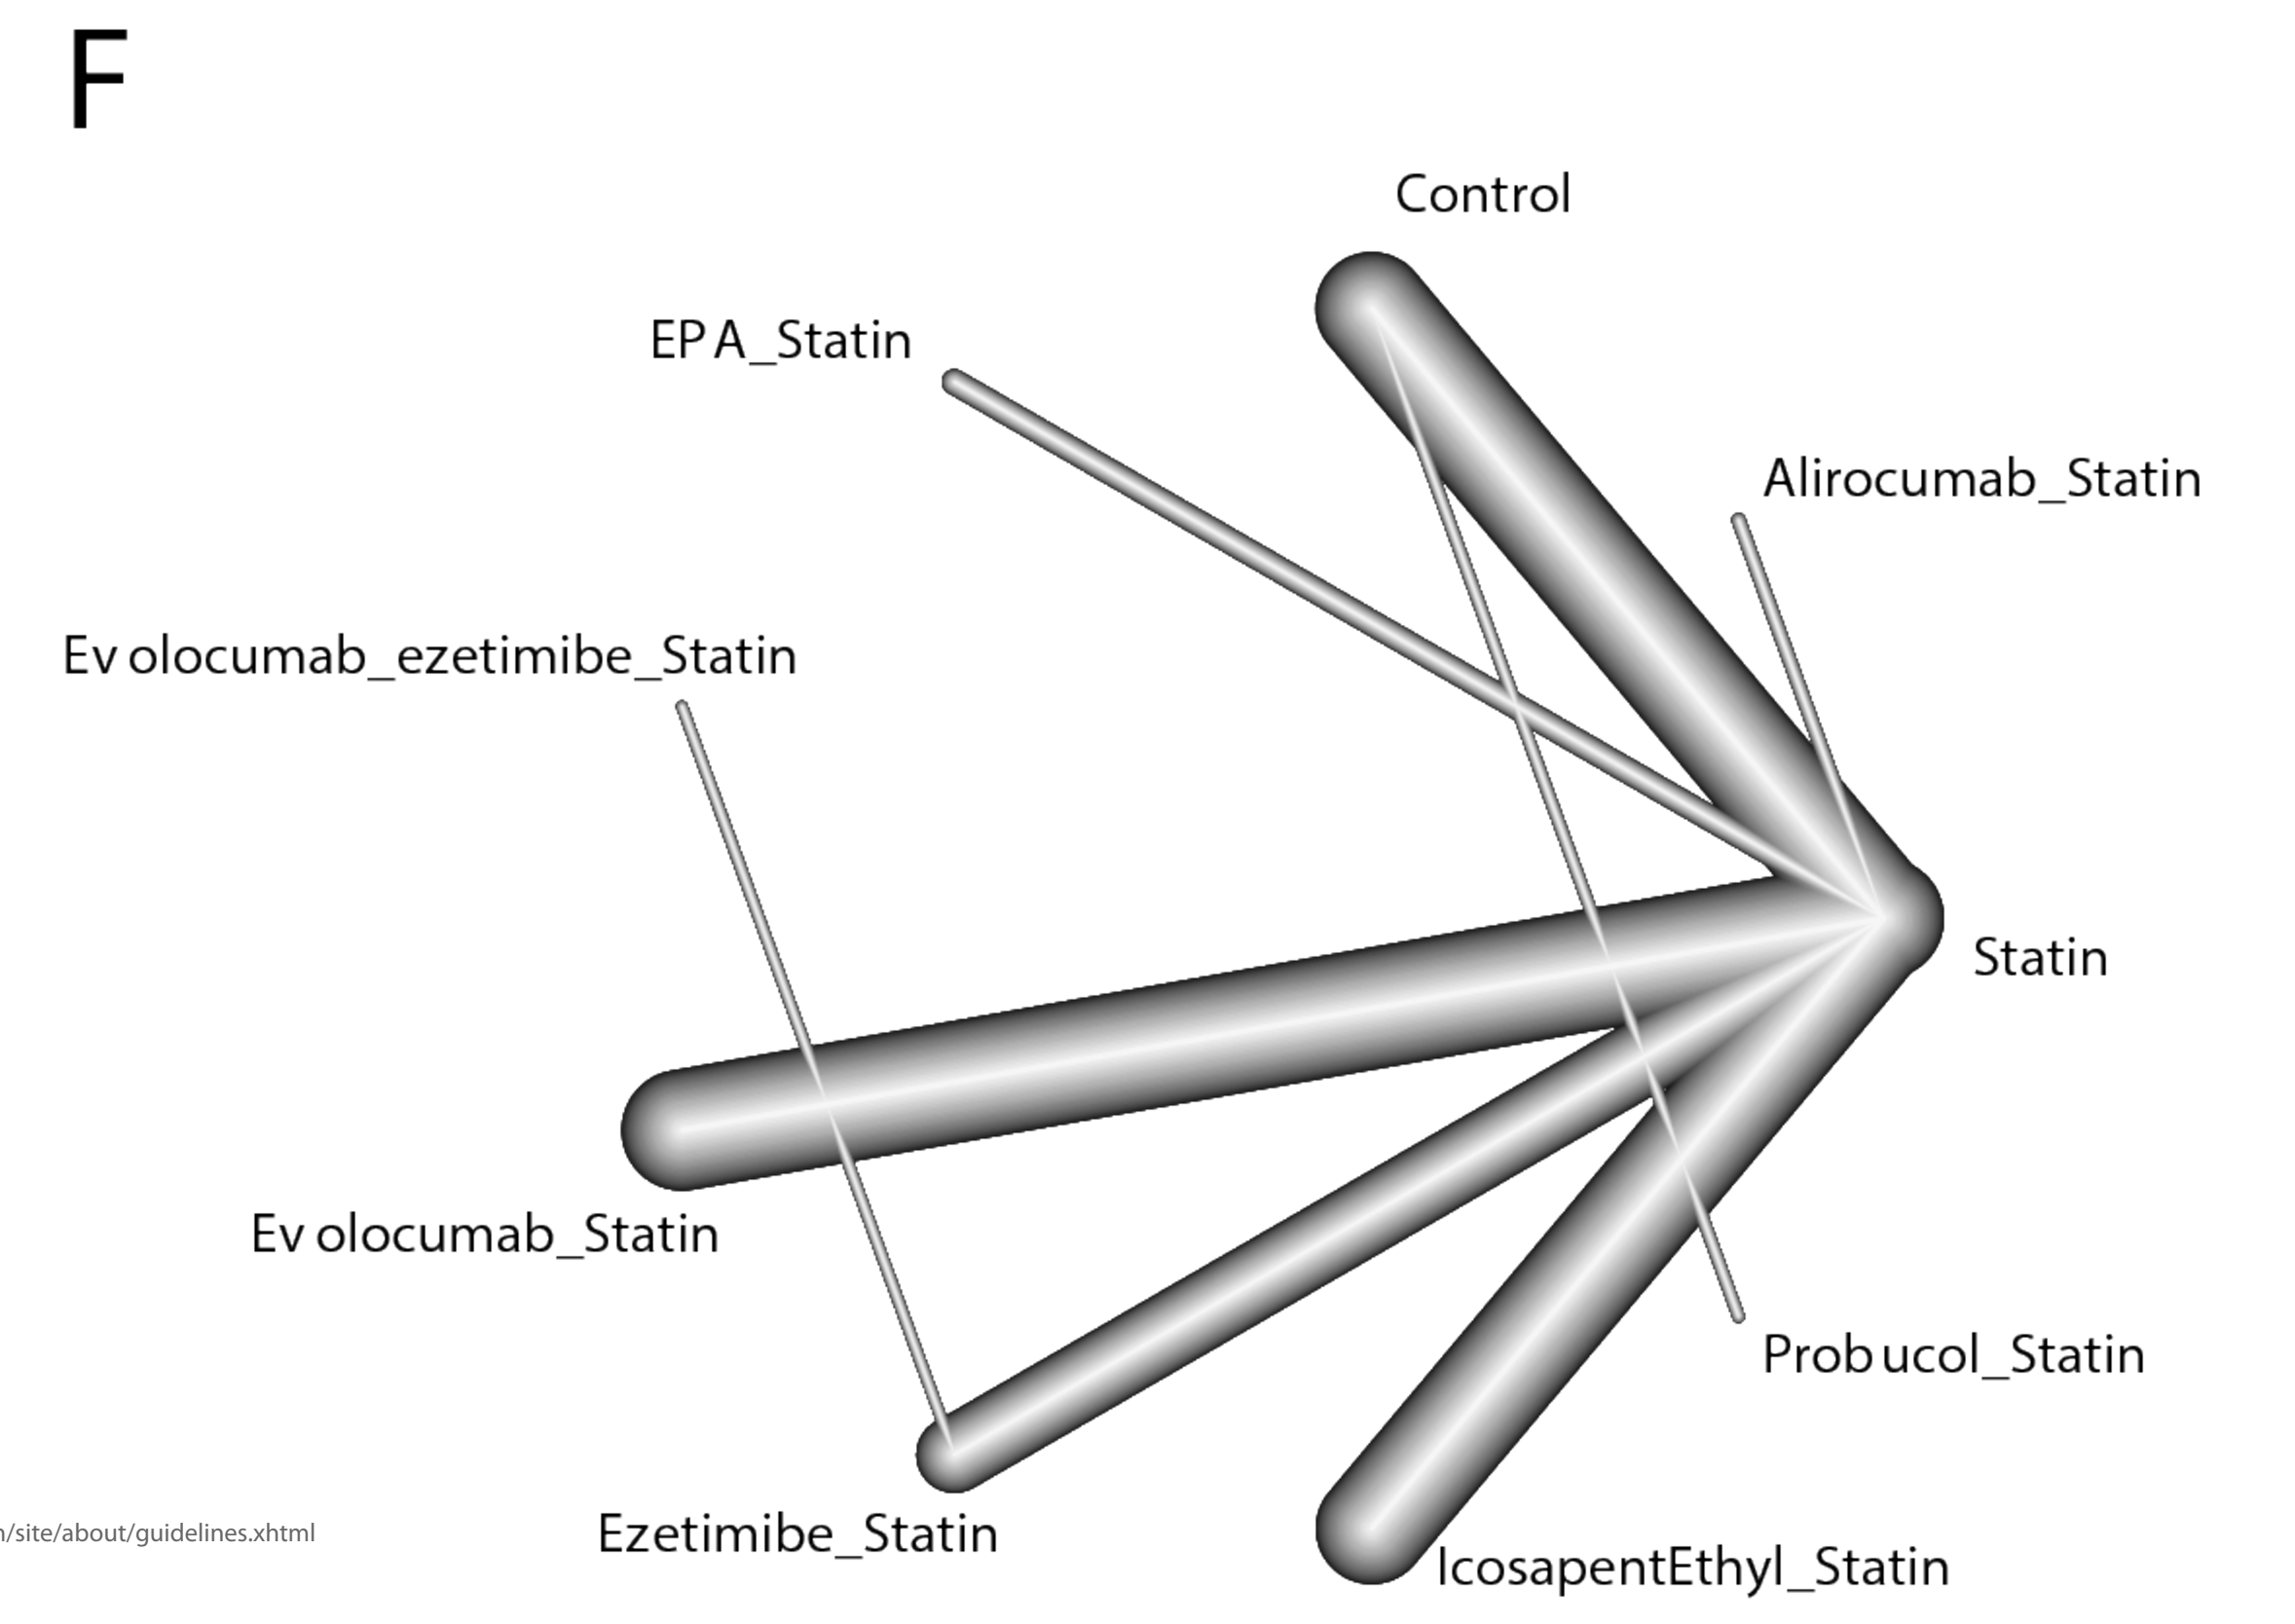

For peer review only



A

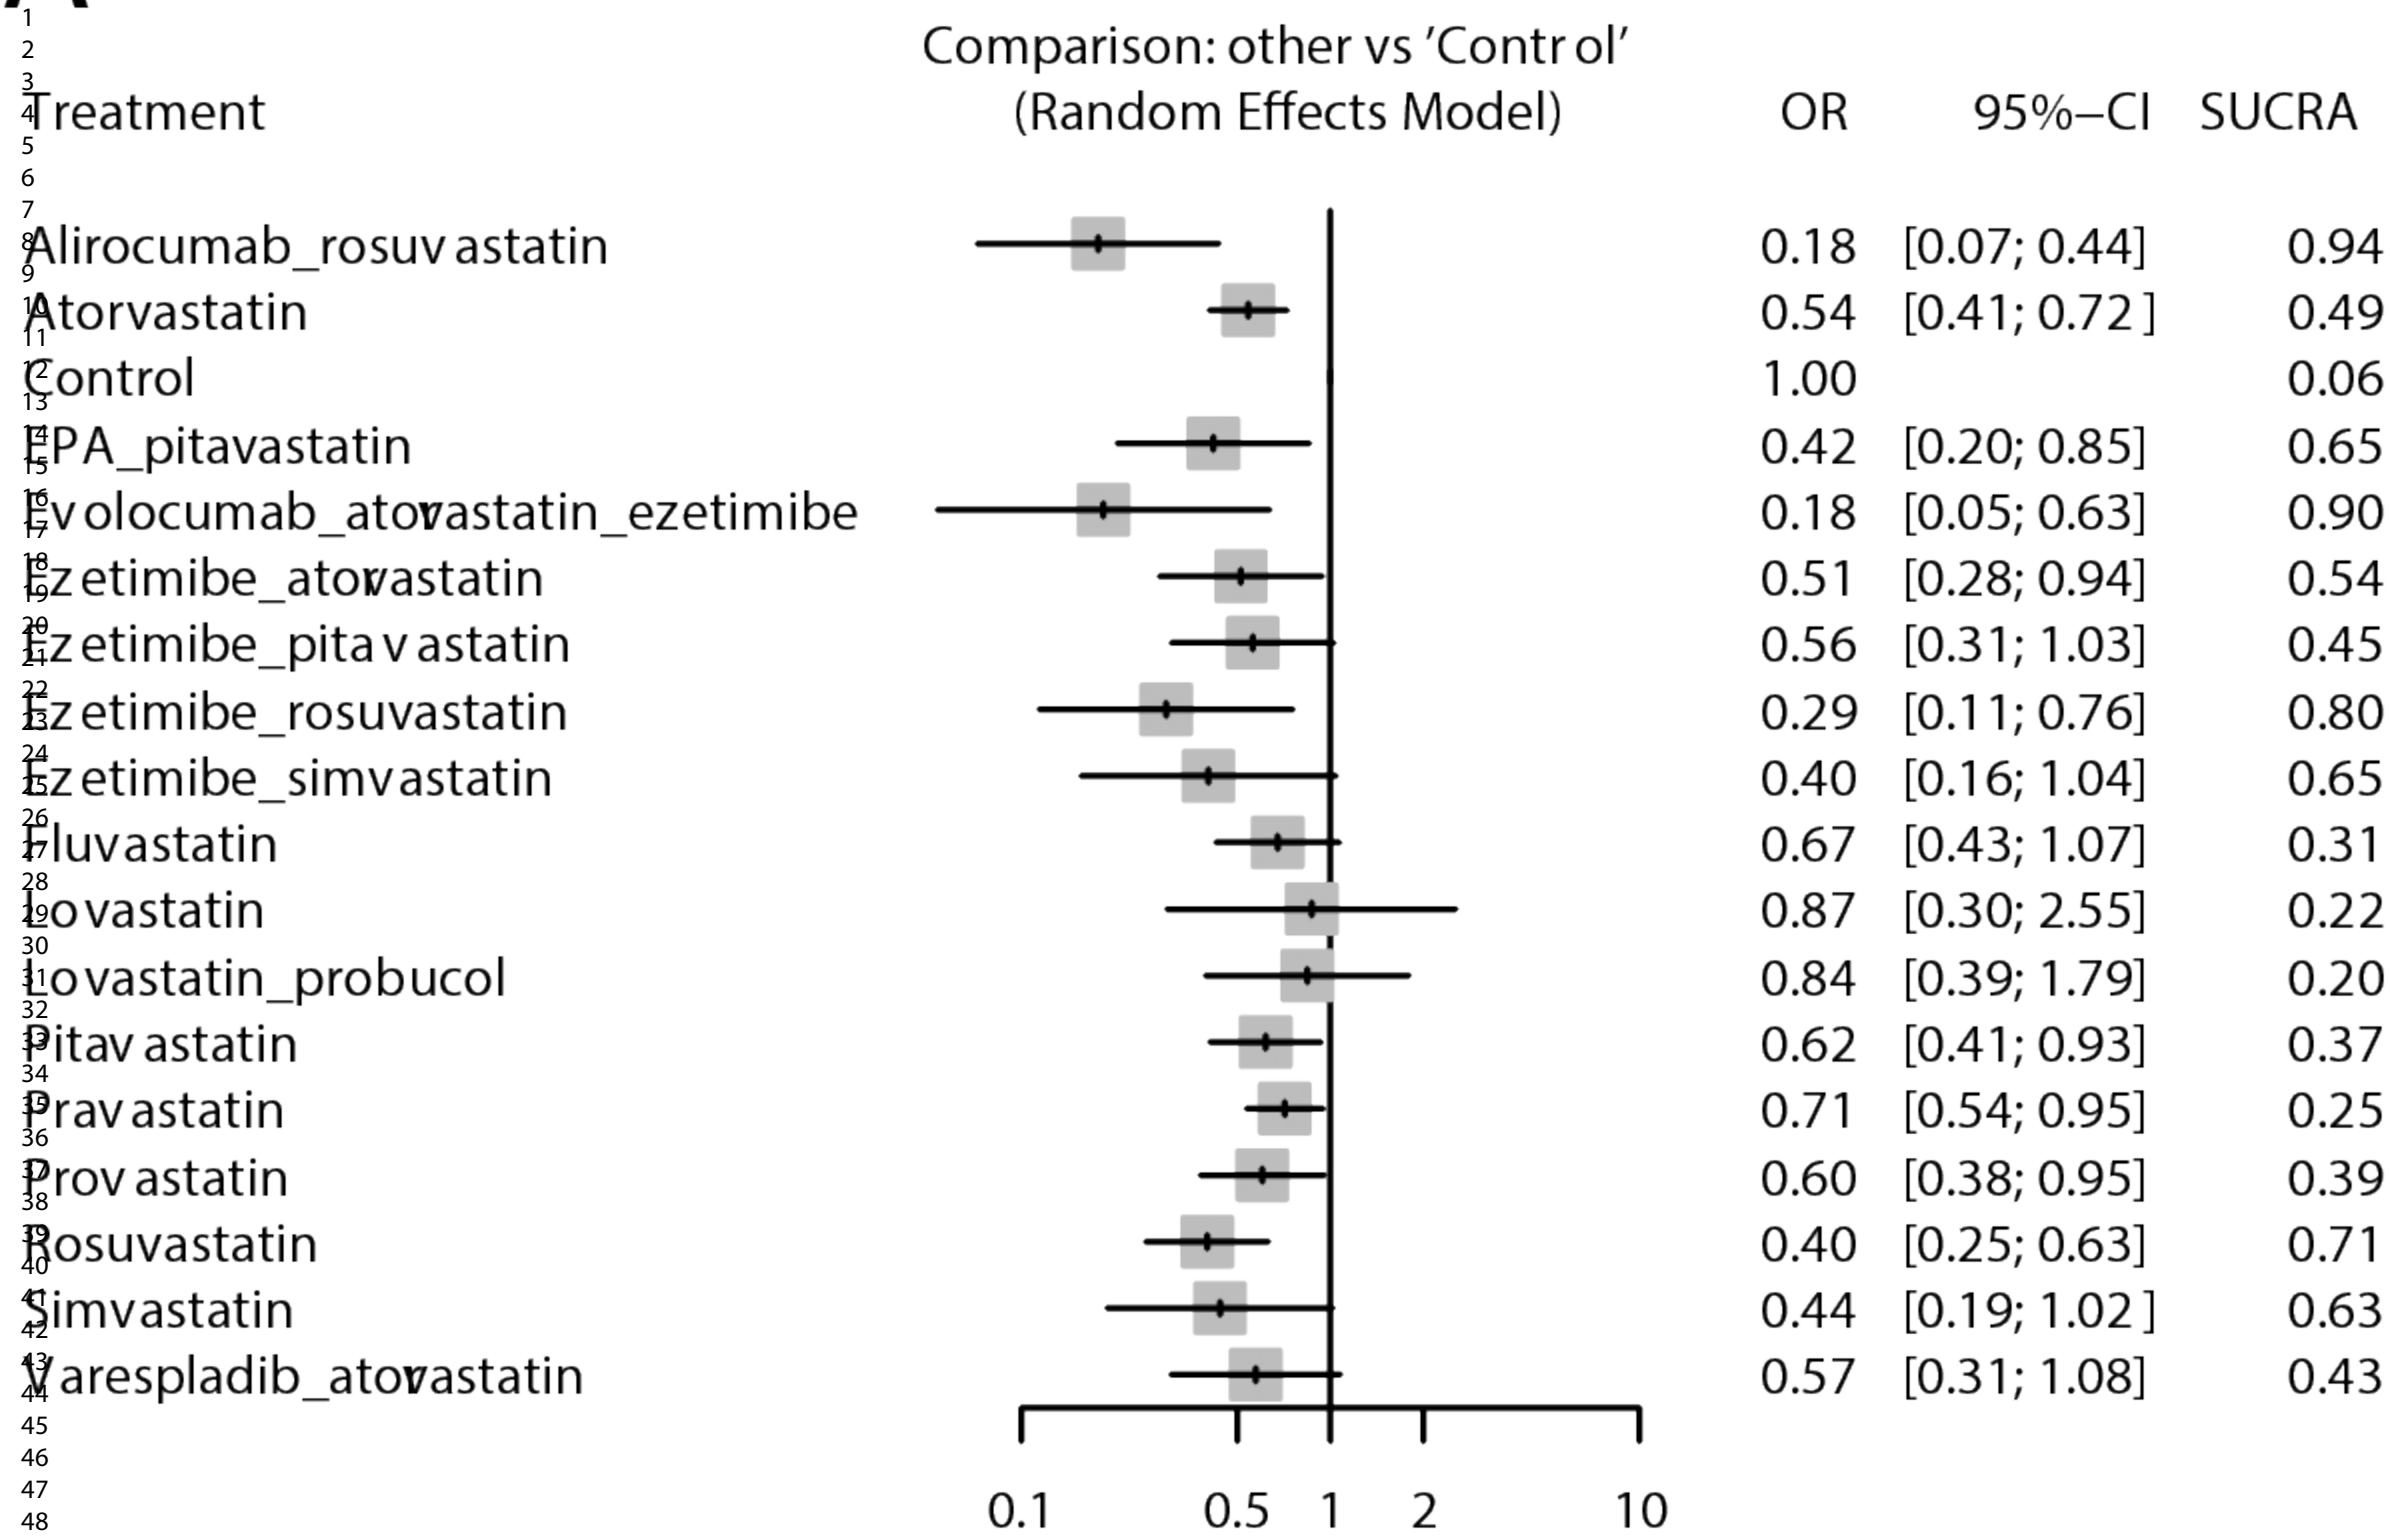

B

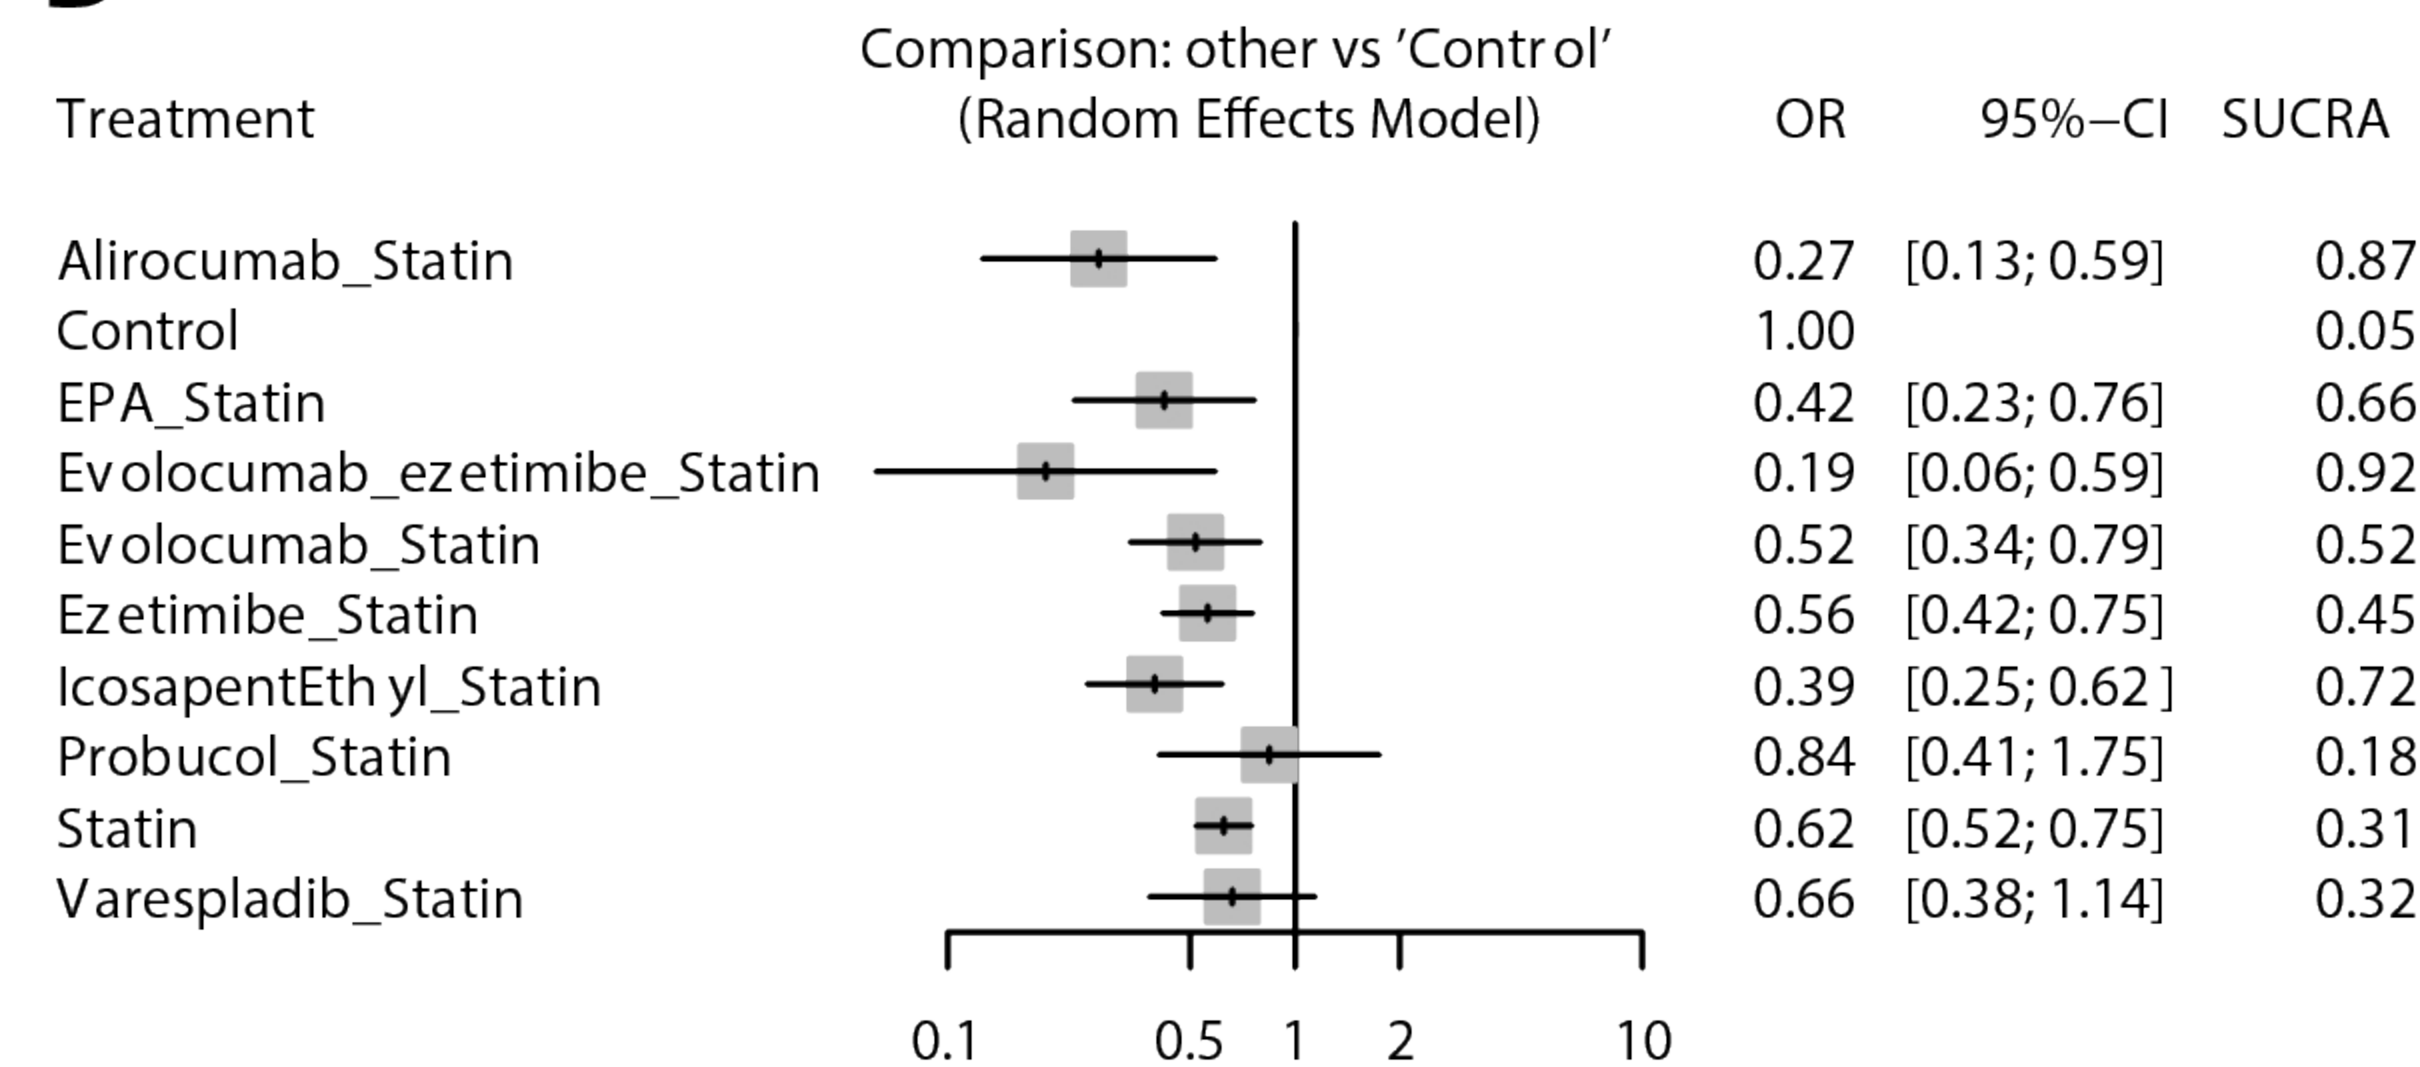

C

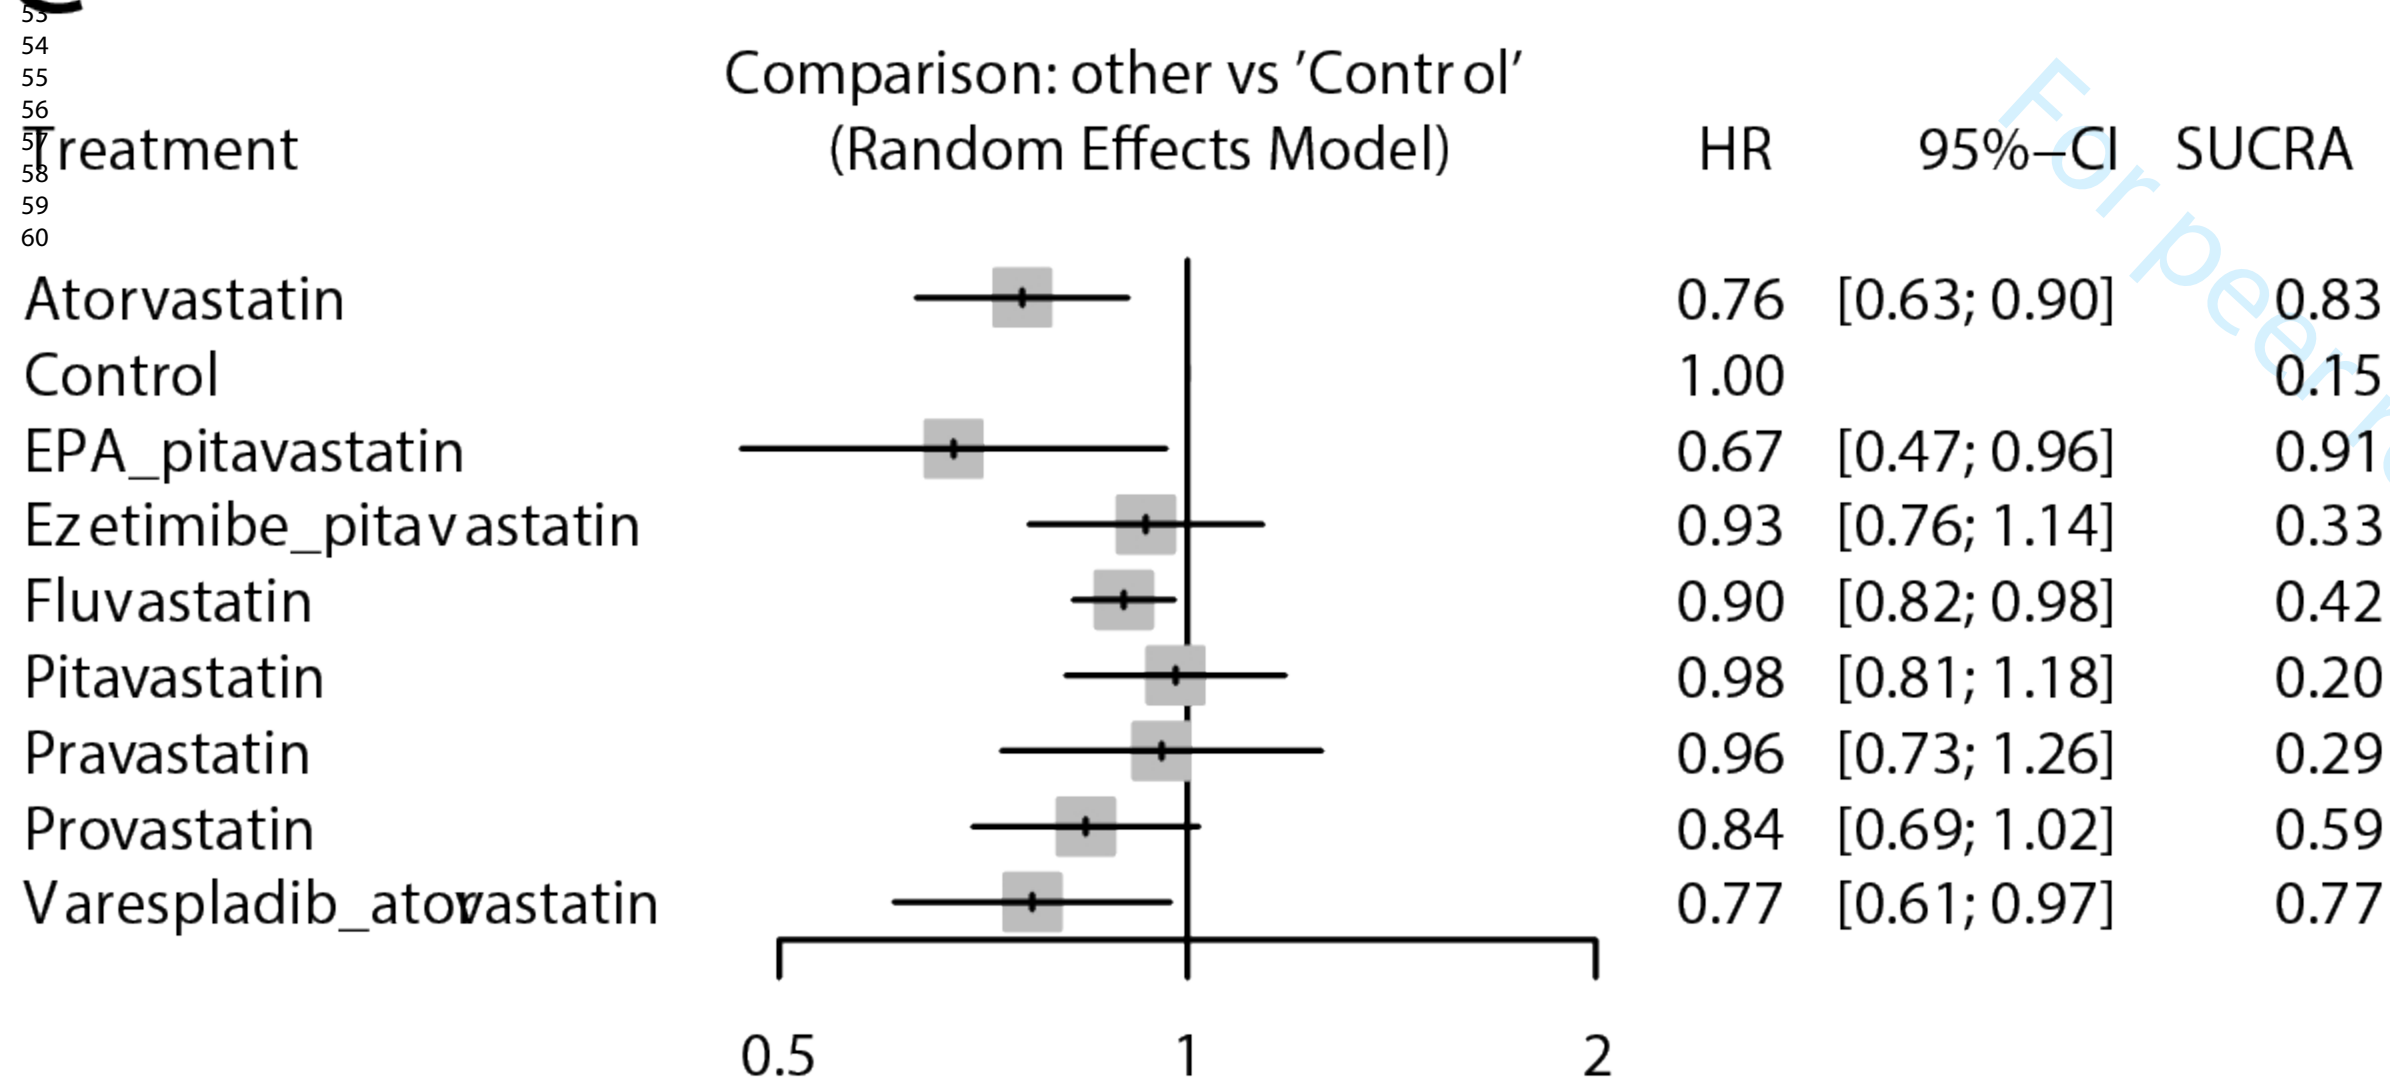

D

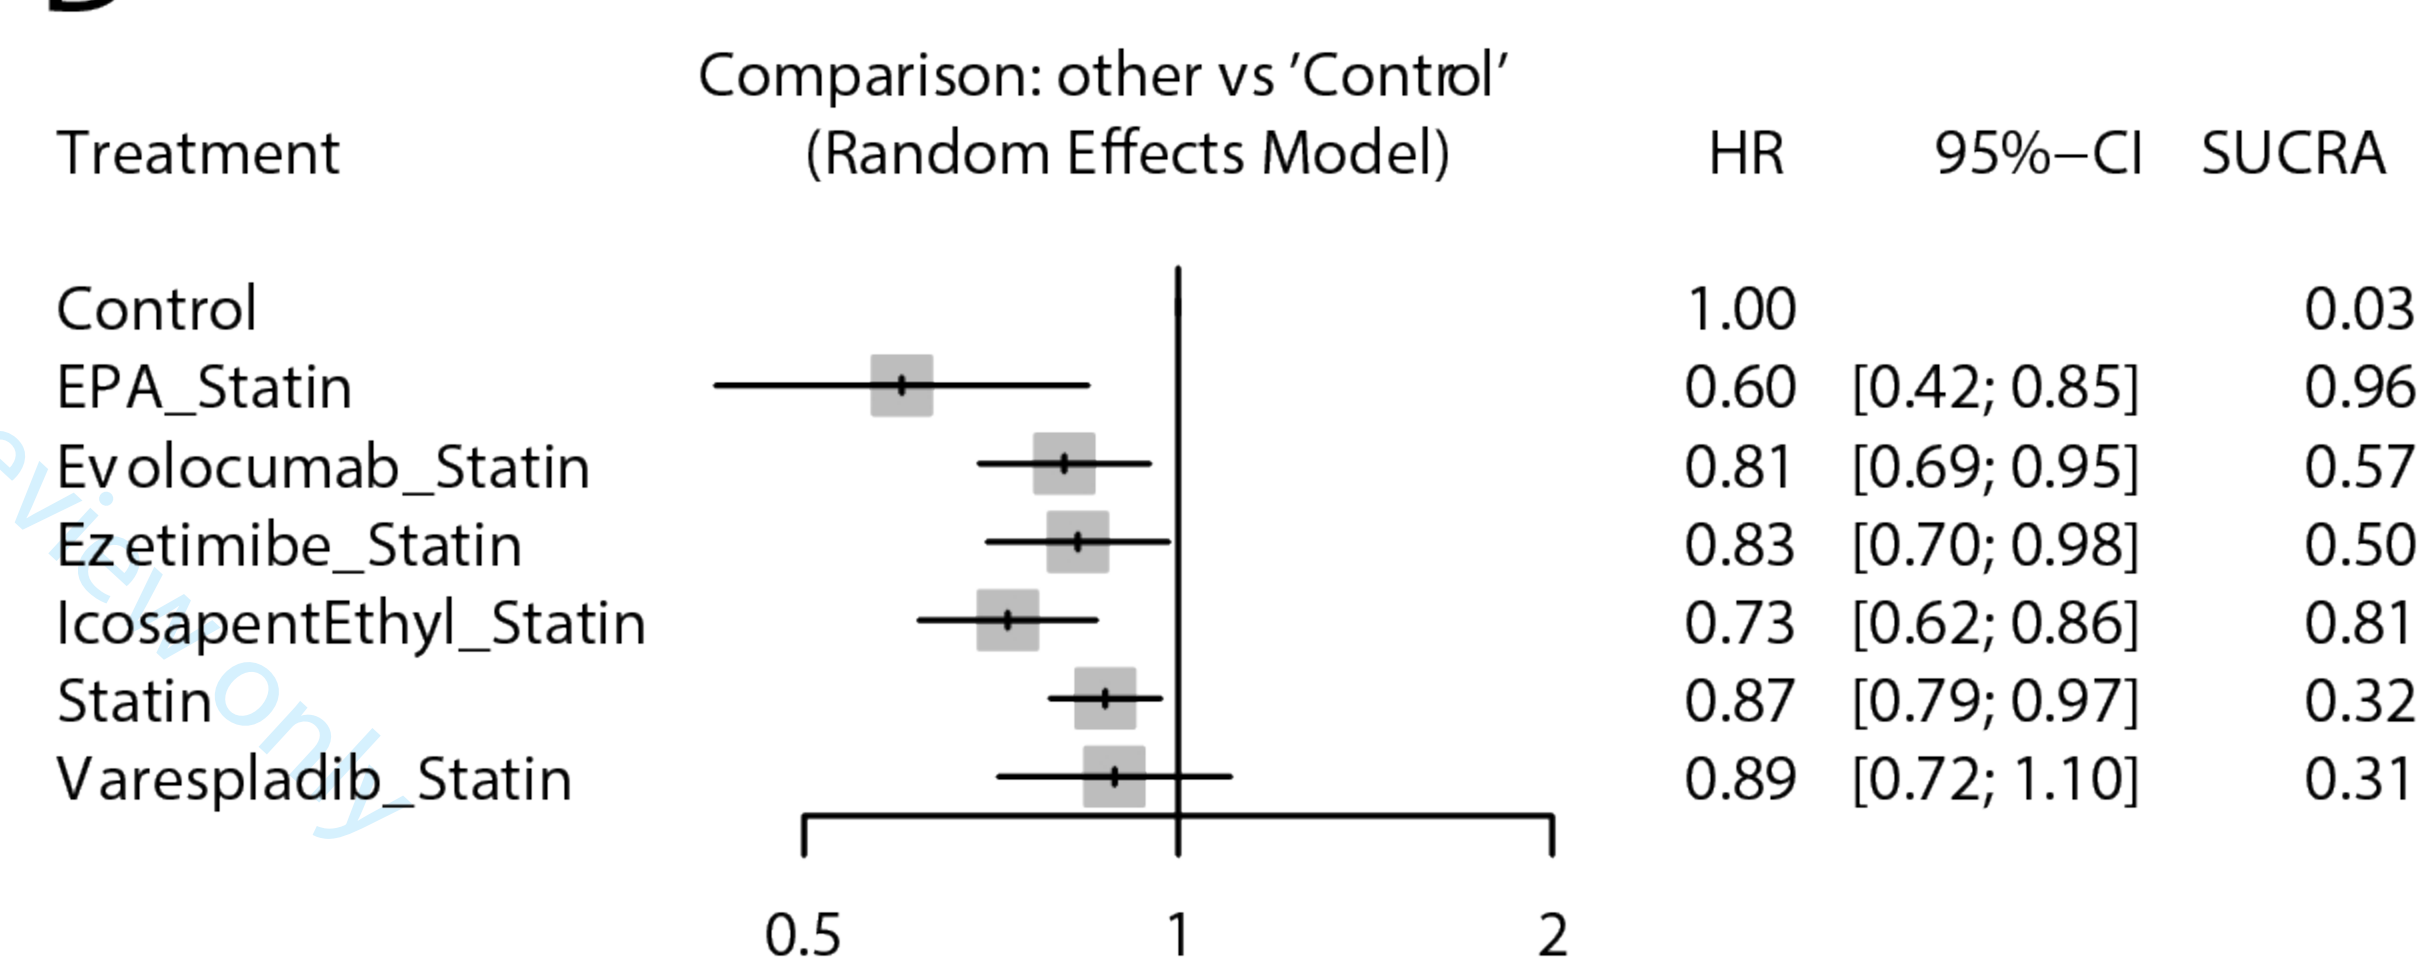

E

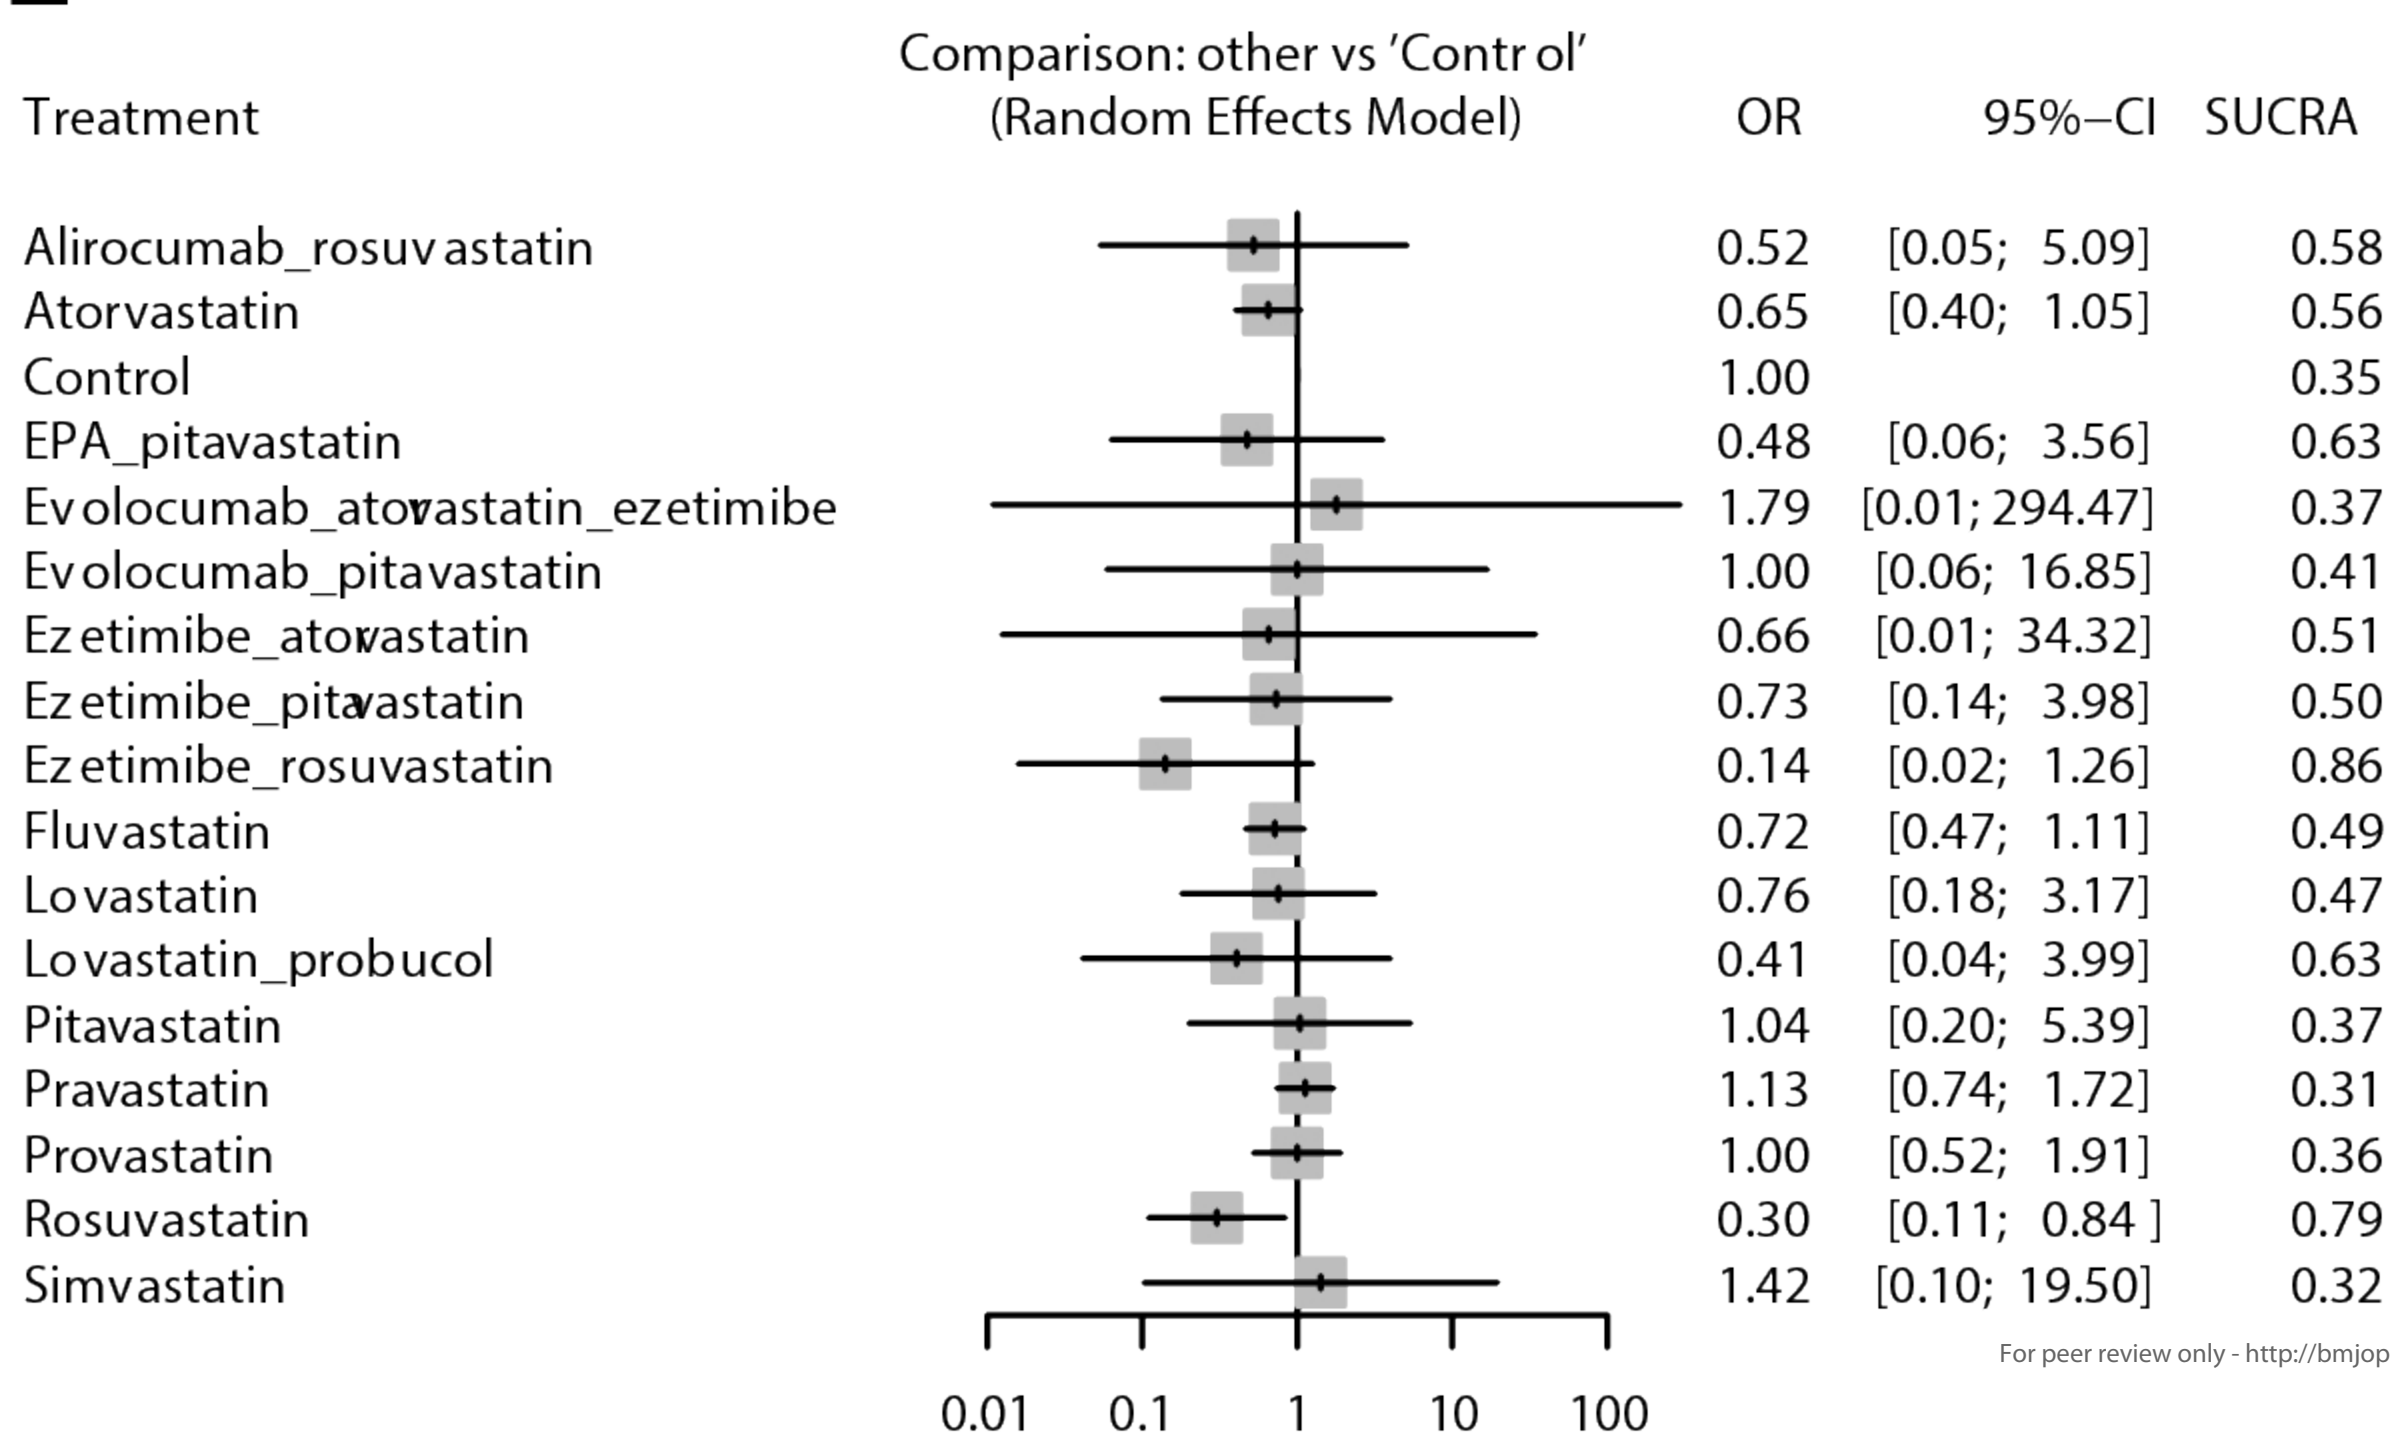

F

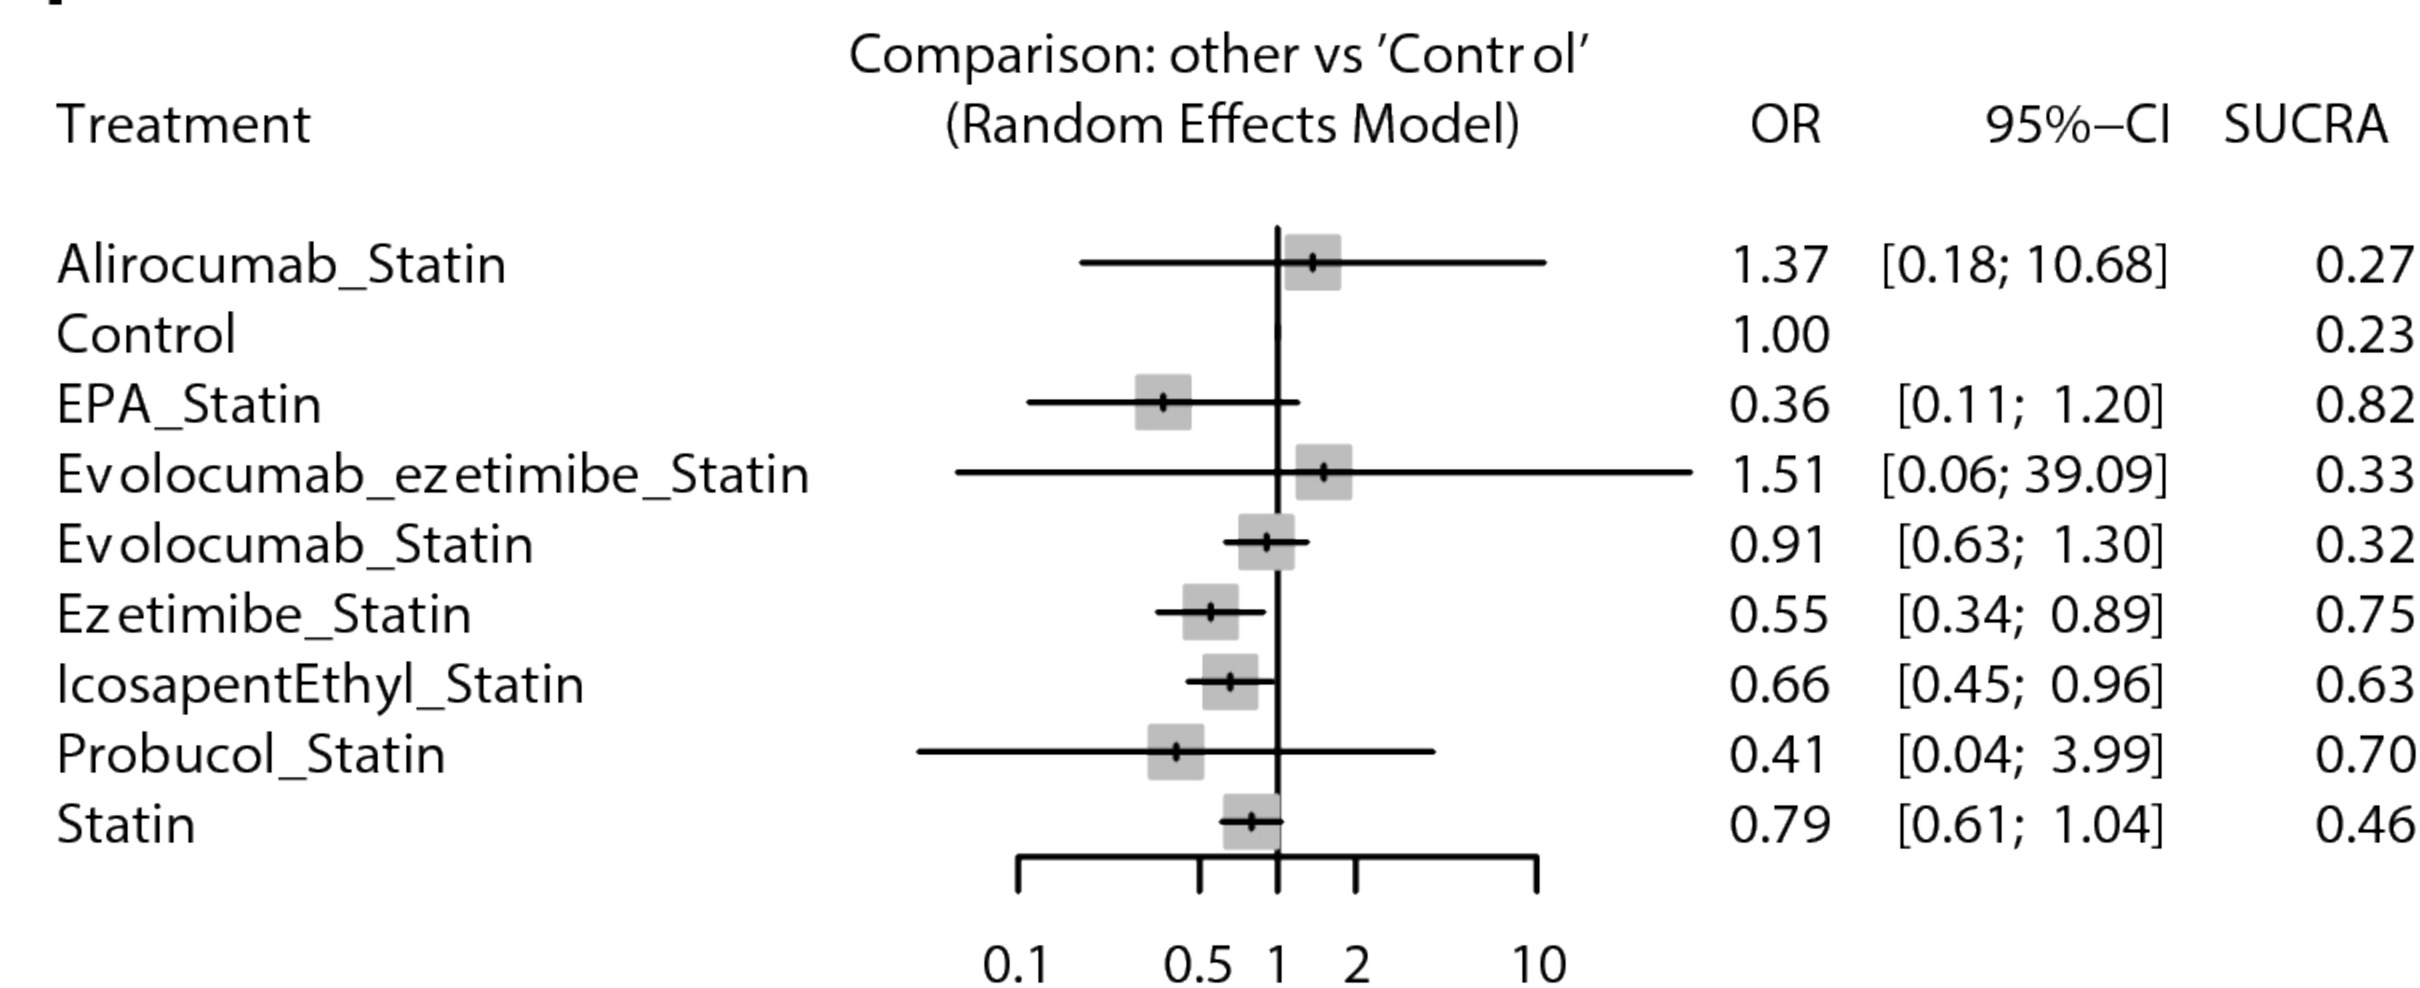

1  
2  
3  
4  
5  
6  
7  
8  
9  
10  
11  
12  
13  
14  
15  
16  
17  
18  
19  
20  
21  
22  
23  
24  
25  
26  
27  
28  
29  
30  
31  
32  
33  
34  
35  
36  
37  
38  
39  
40  
41  
42  
43  
44  
45  
46  
47  
48  
49  
50  
51  
52  
53  
54  
55  
56  
57  
58  
59  
60

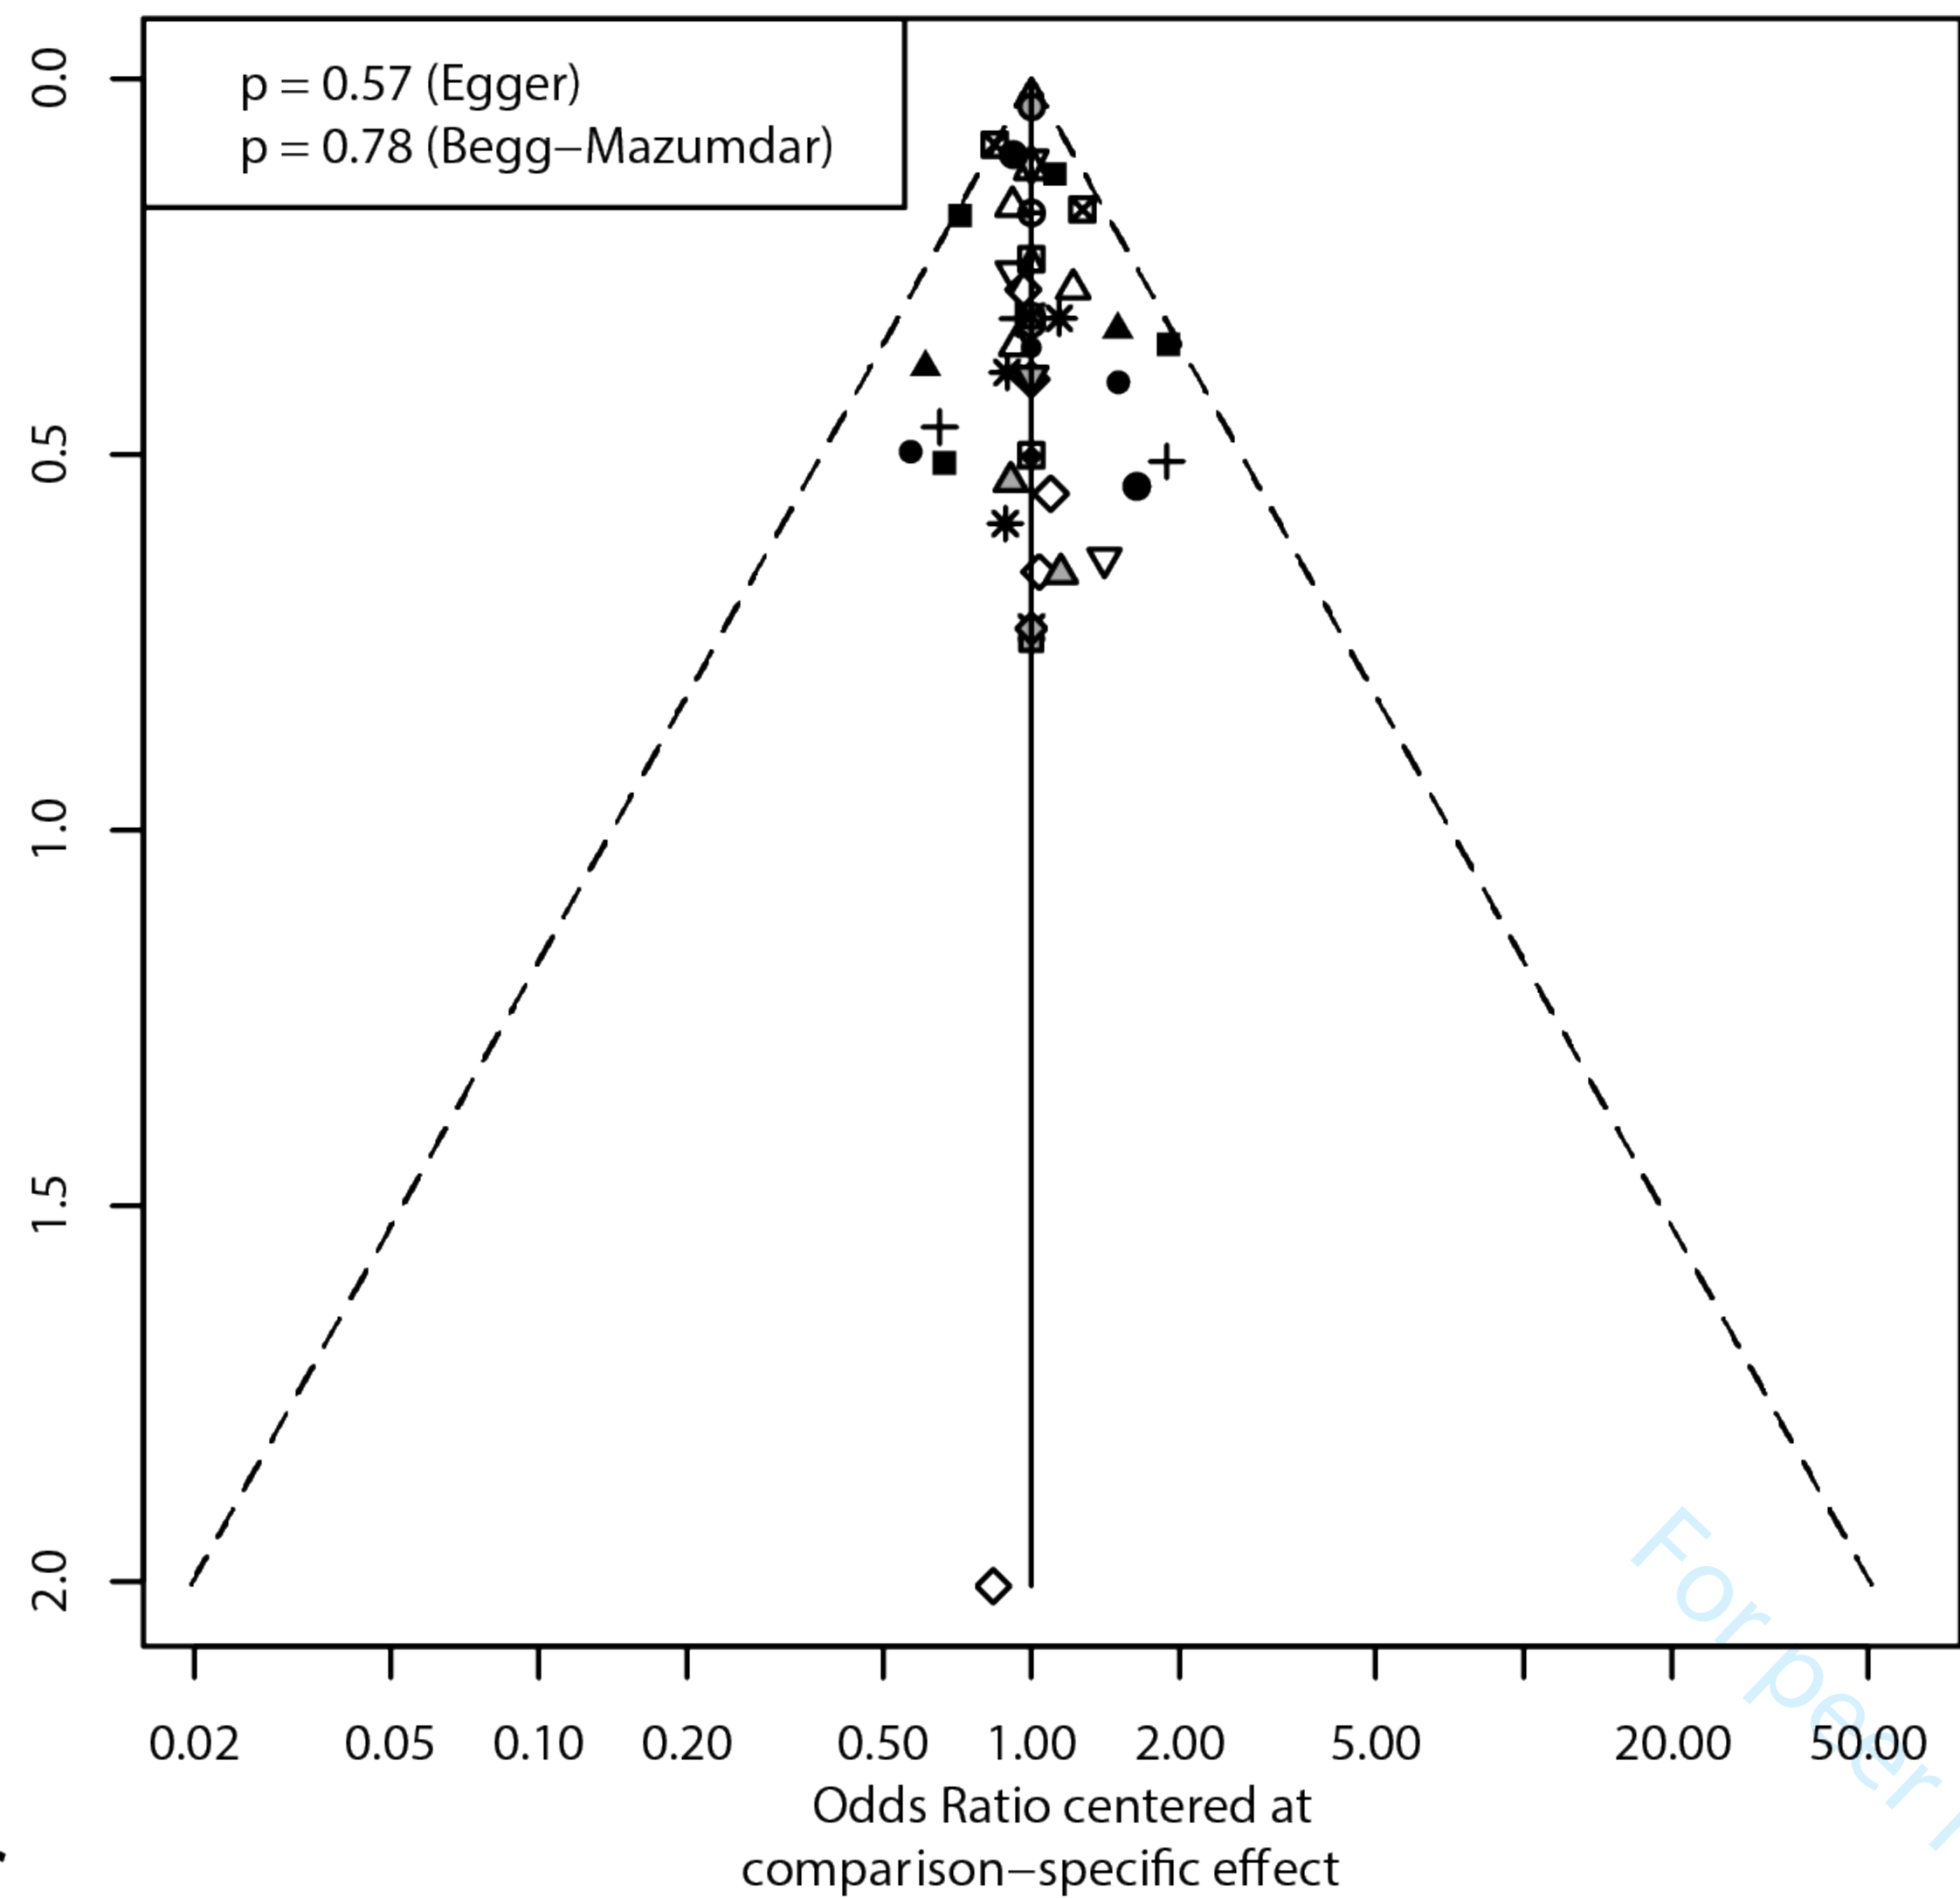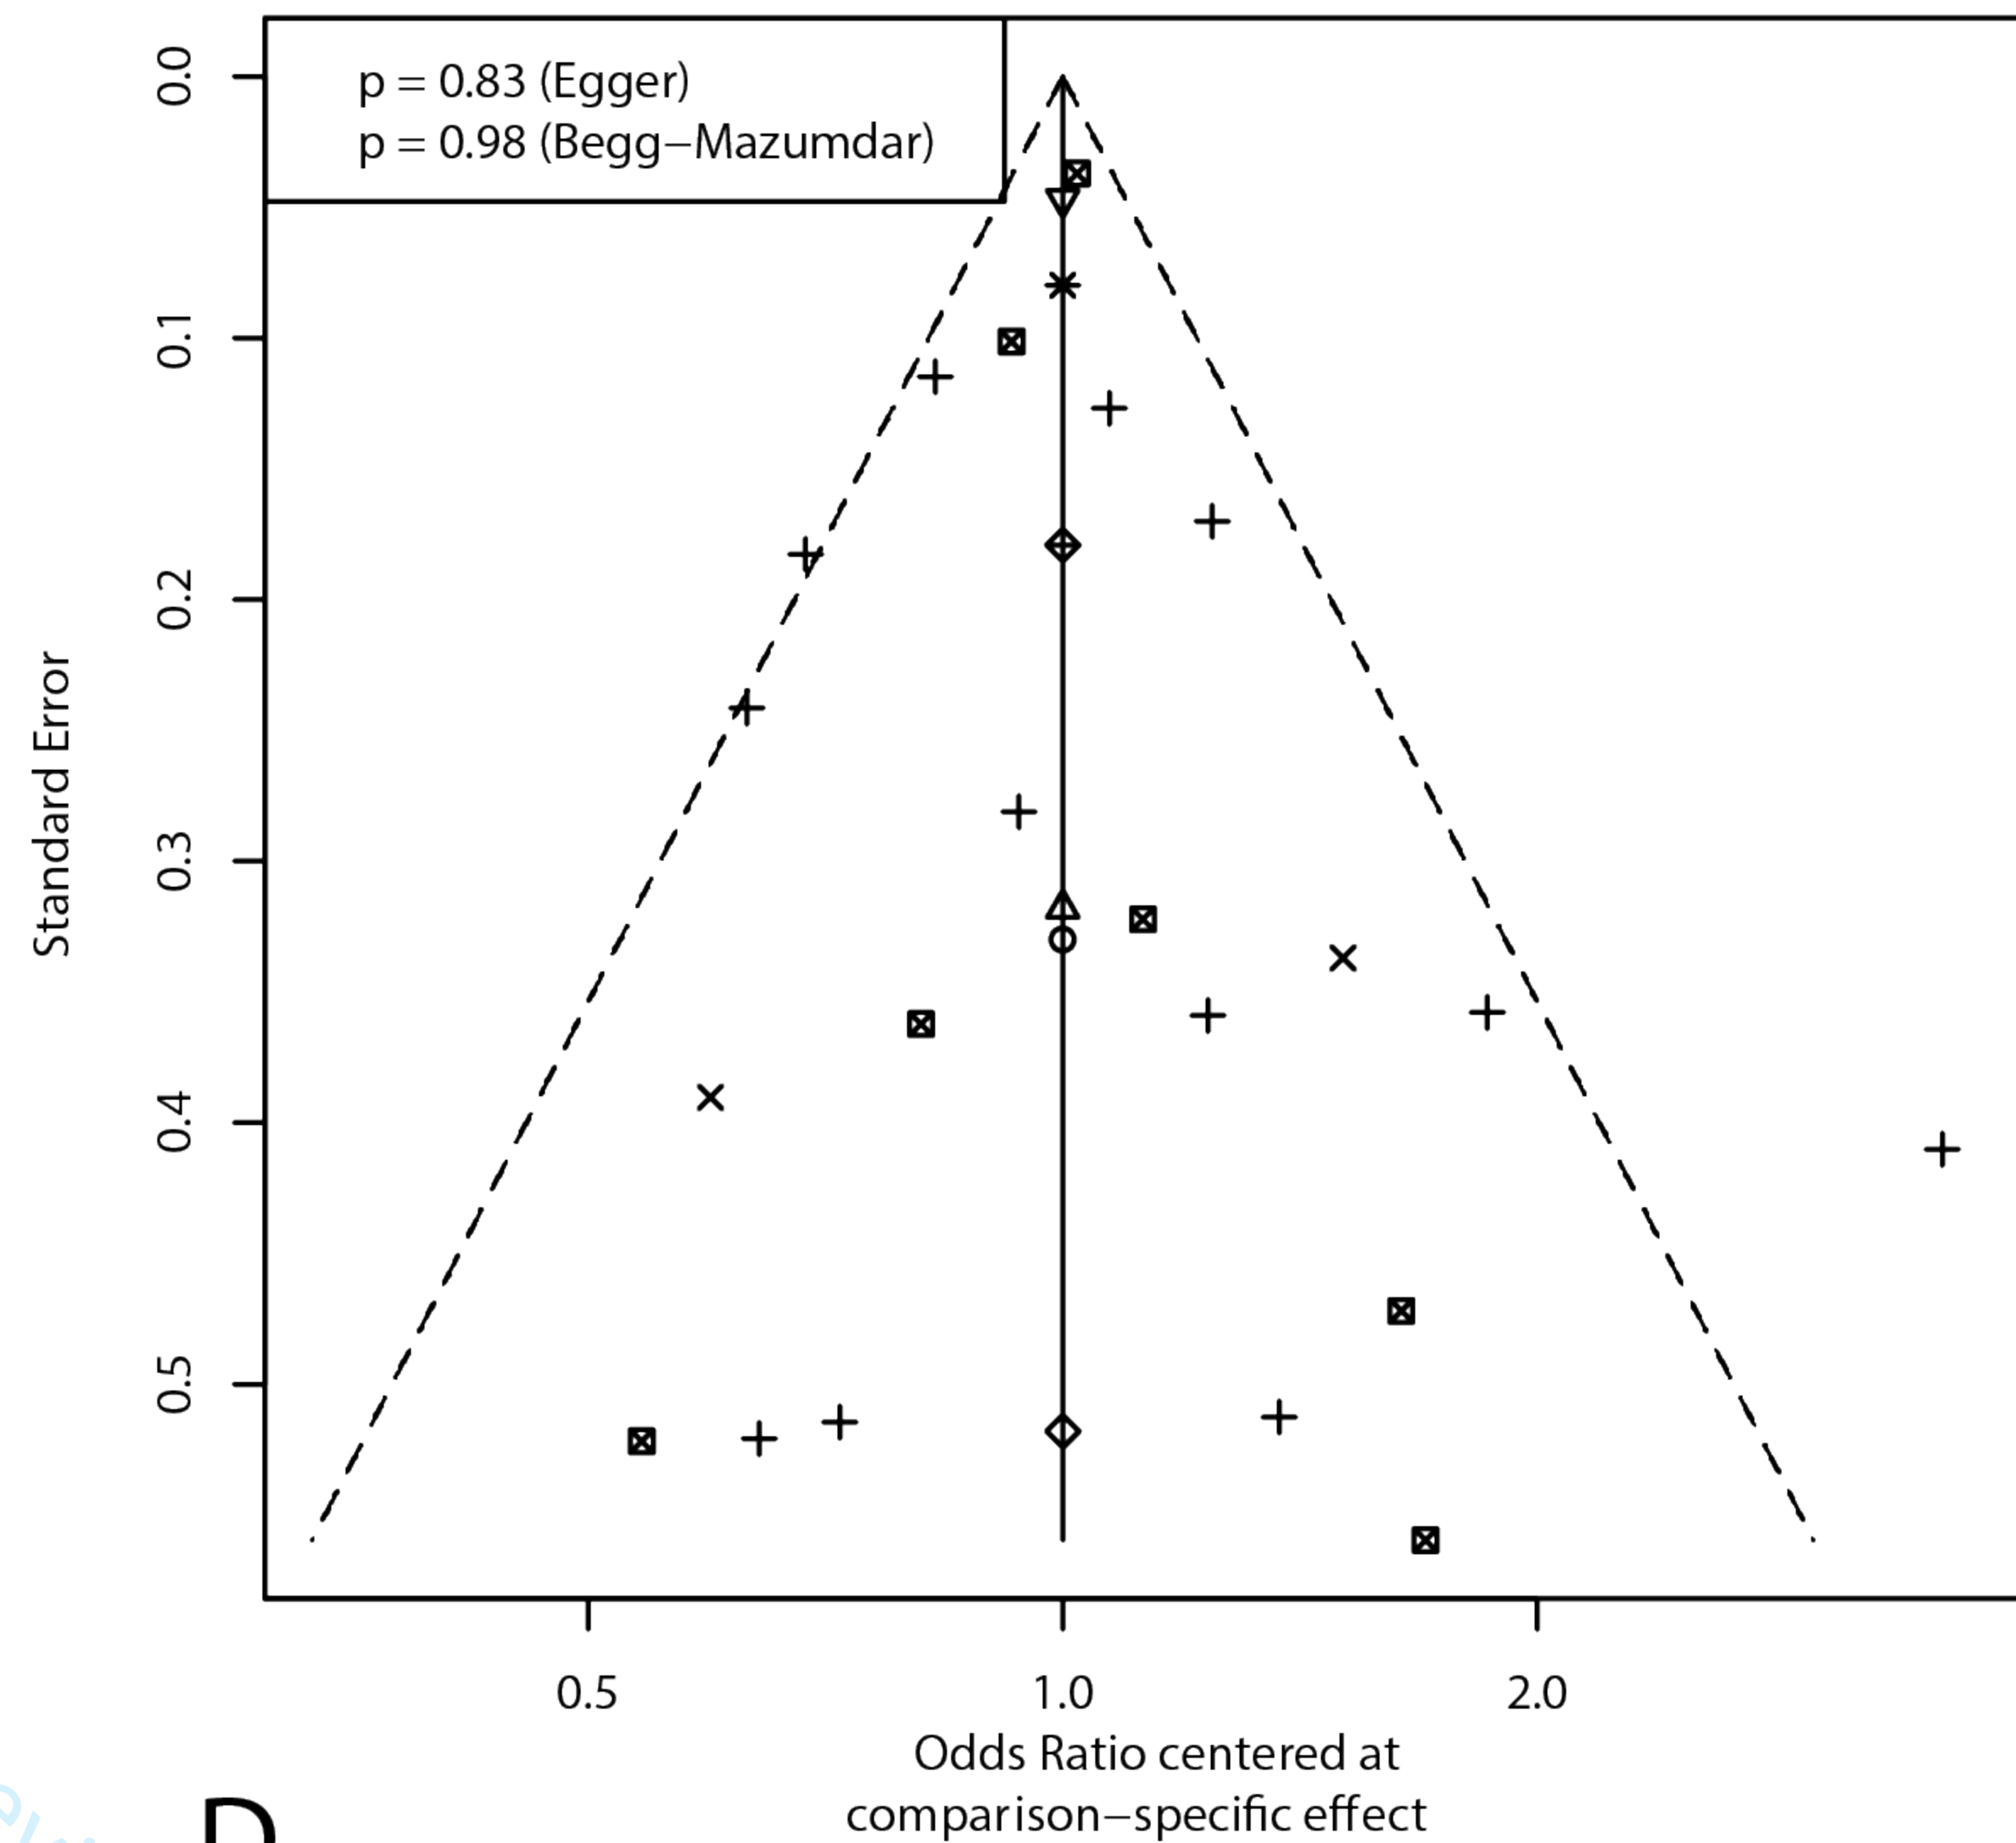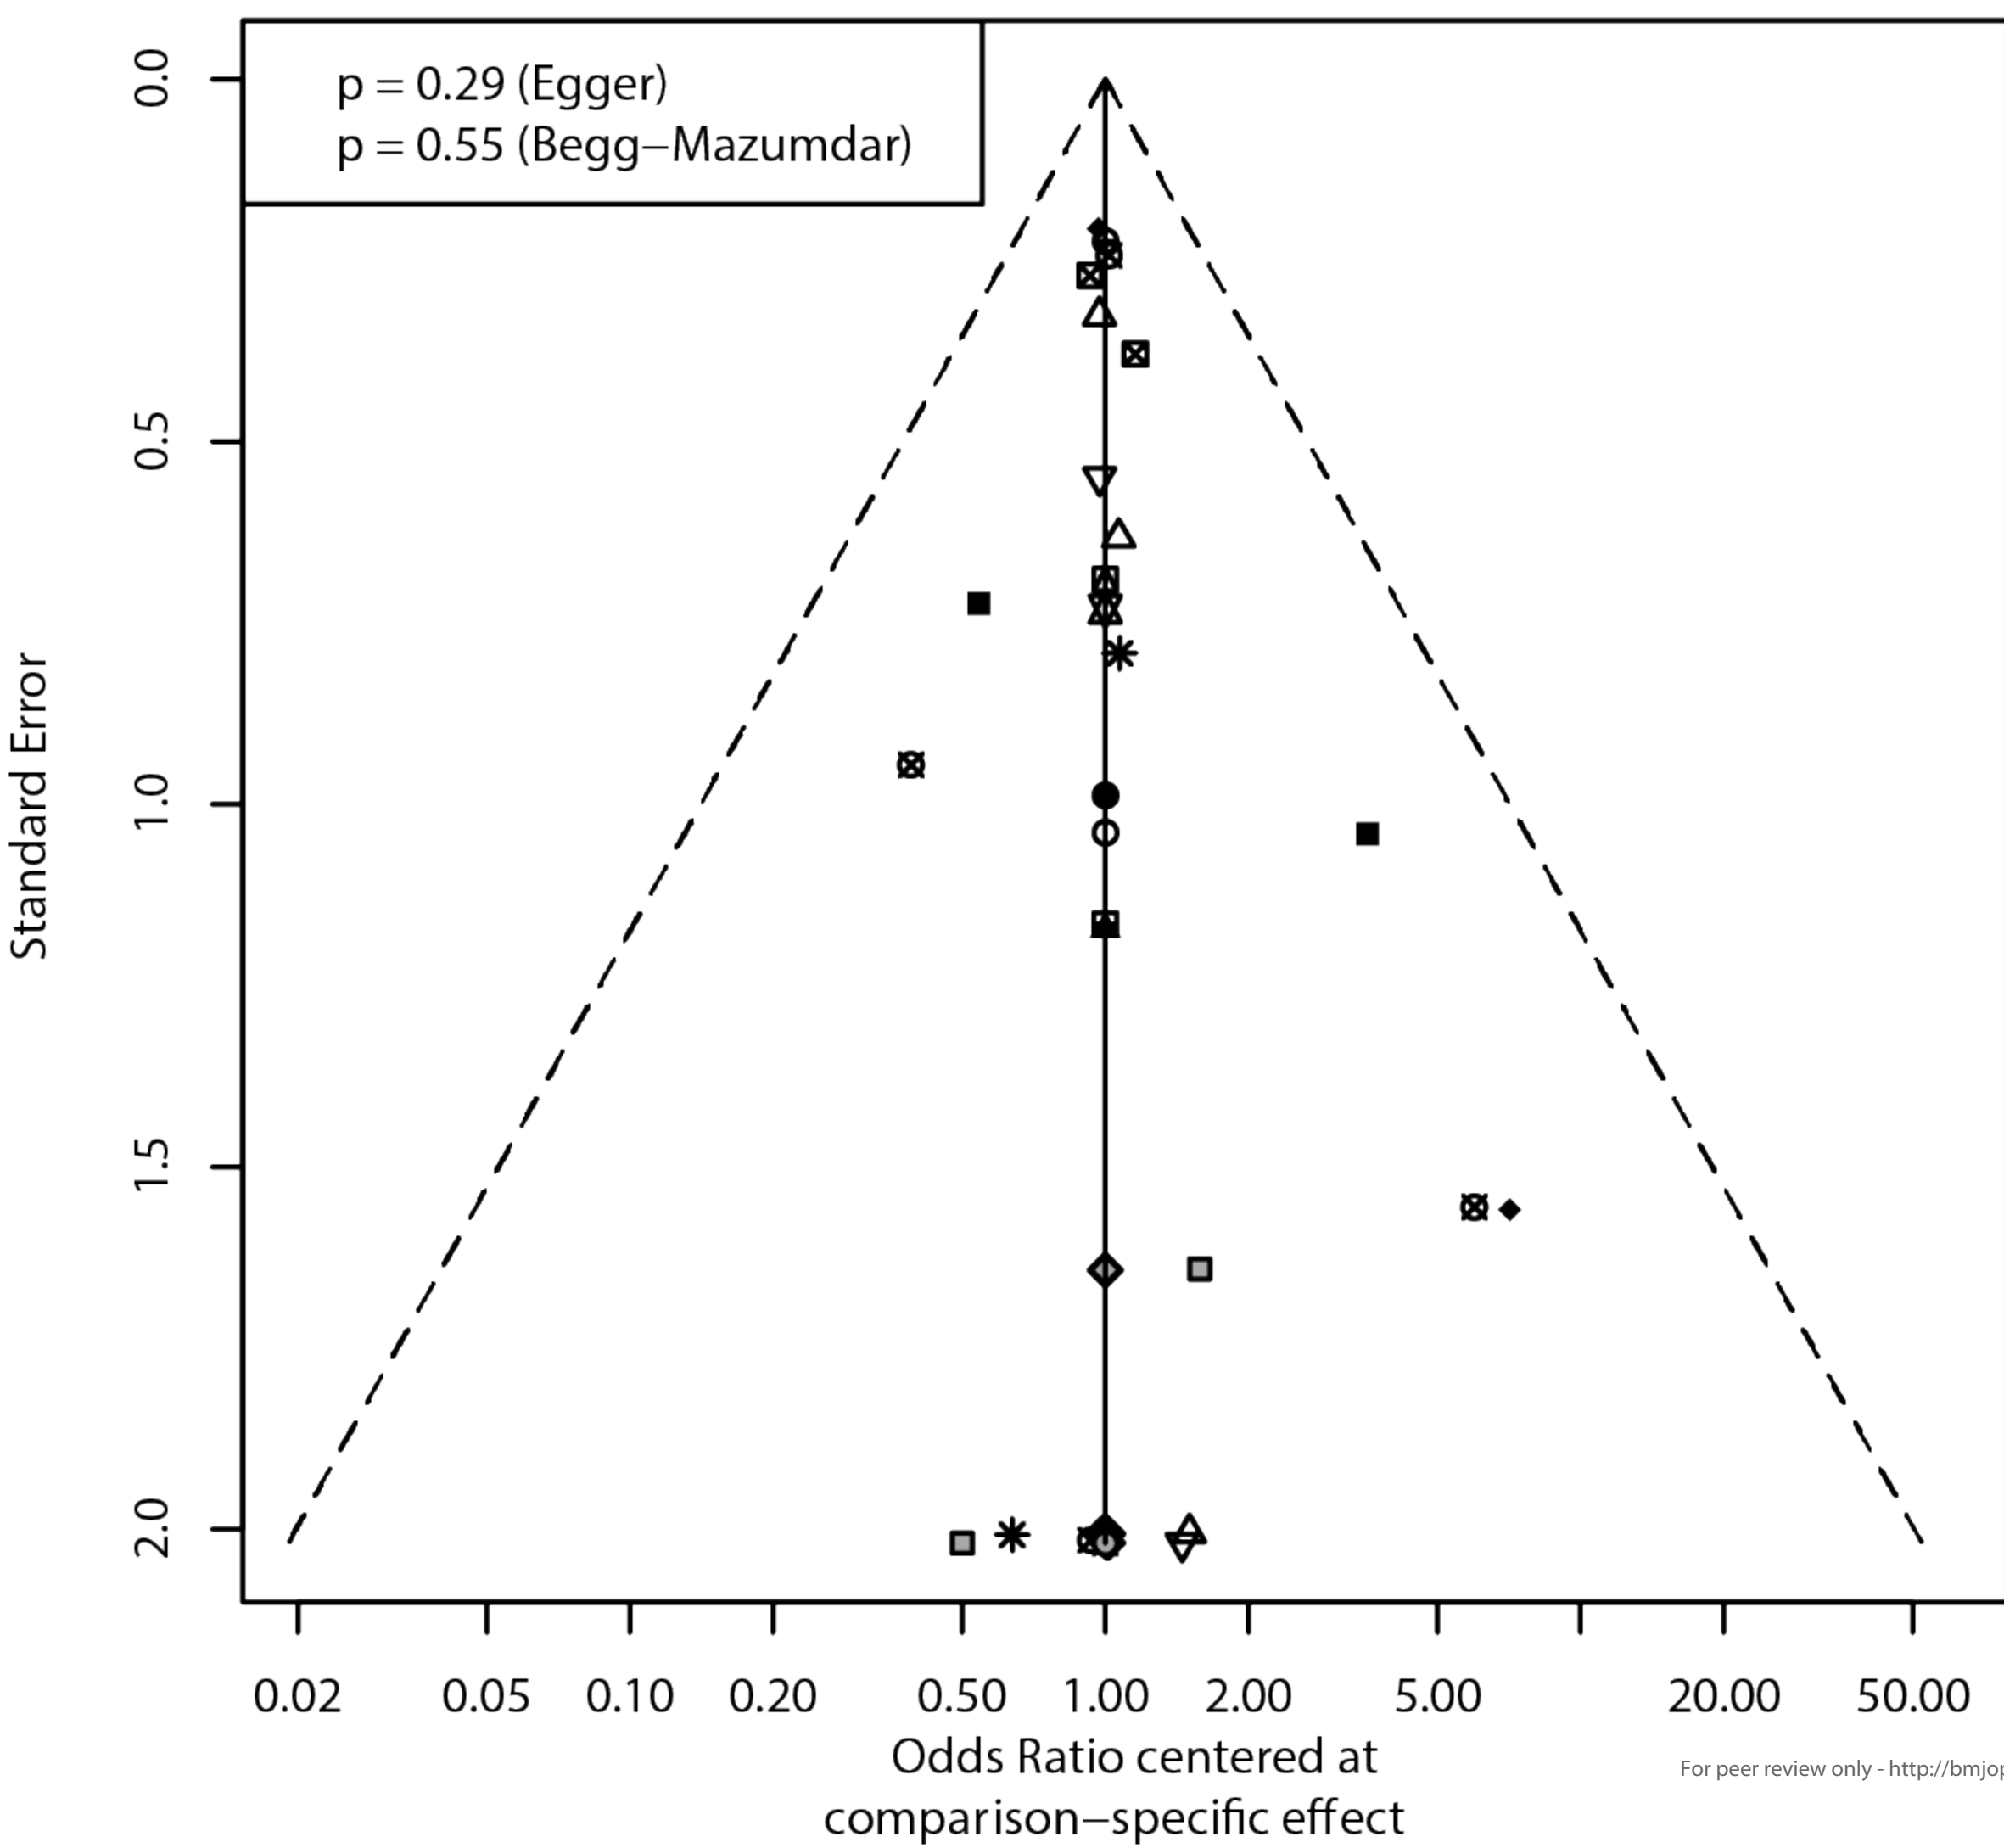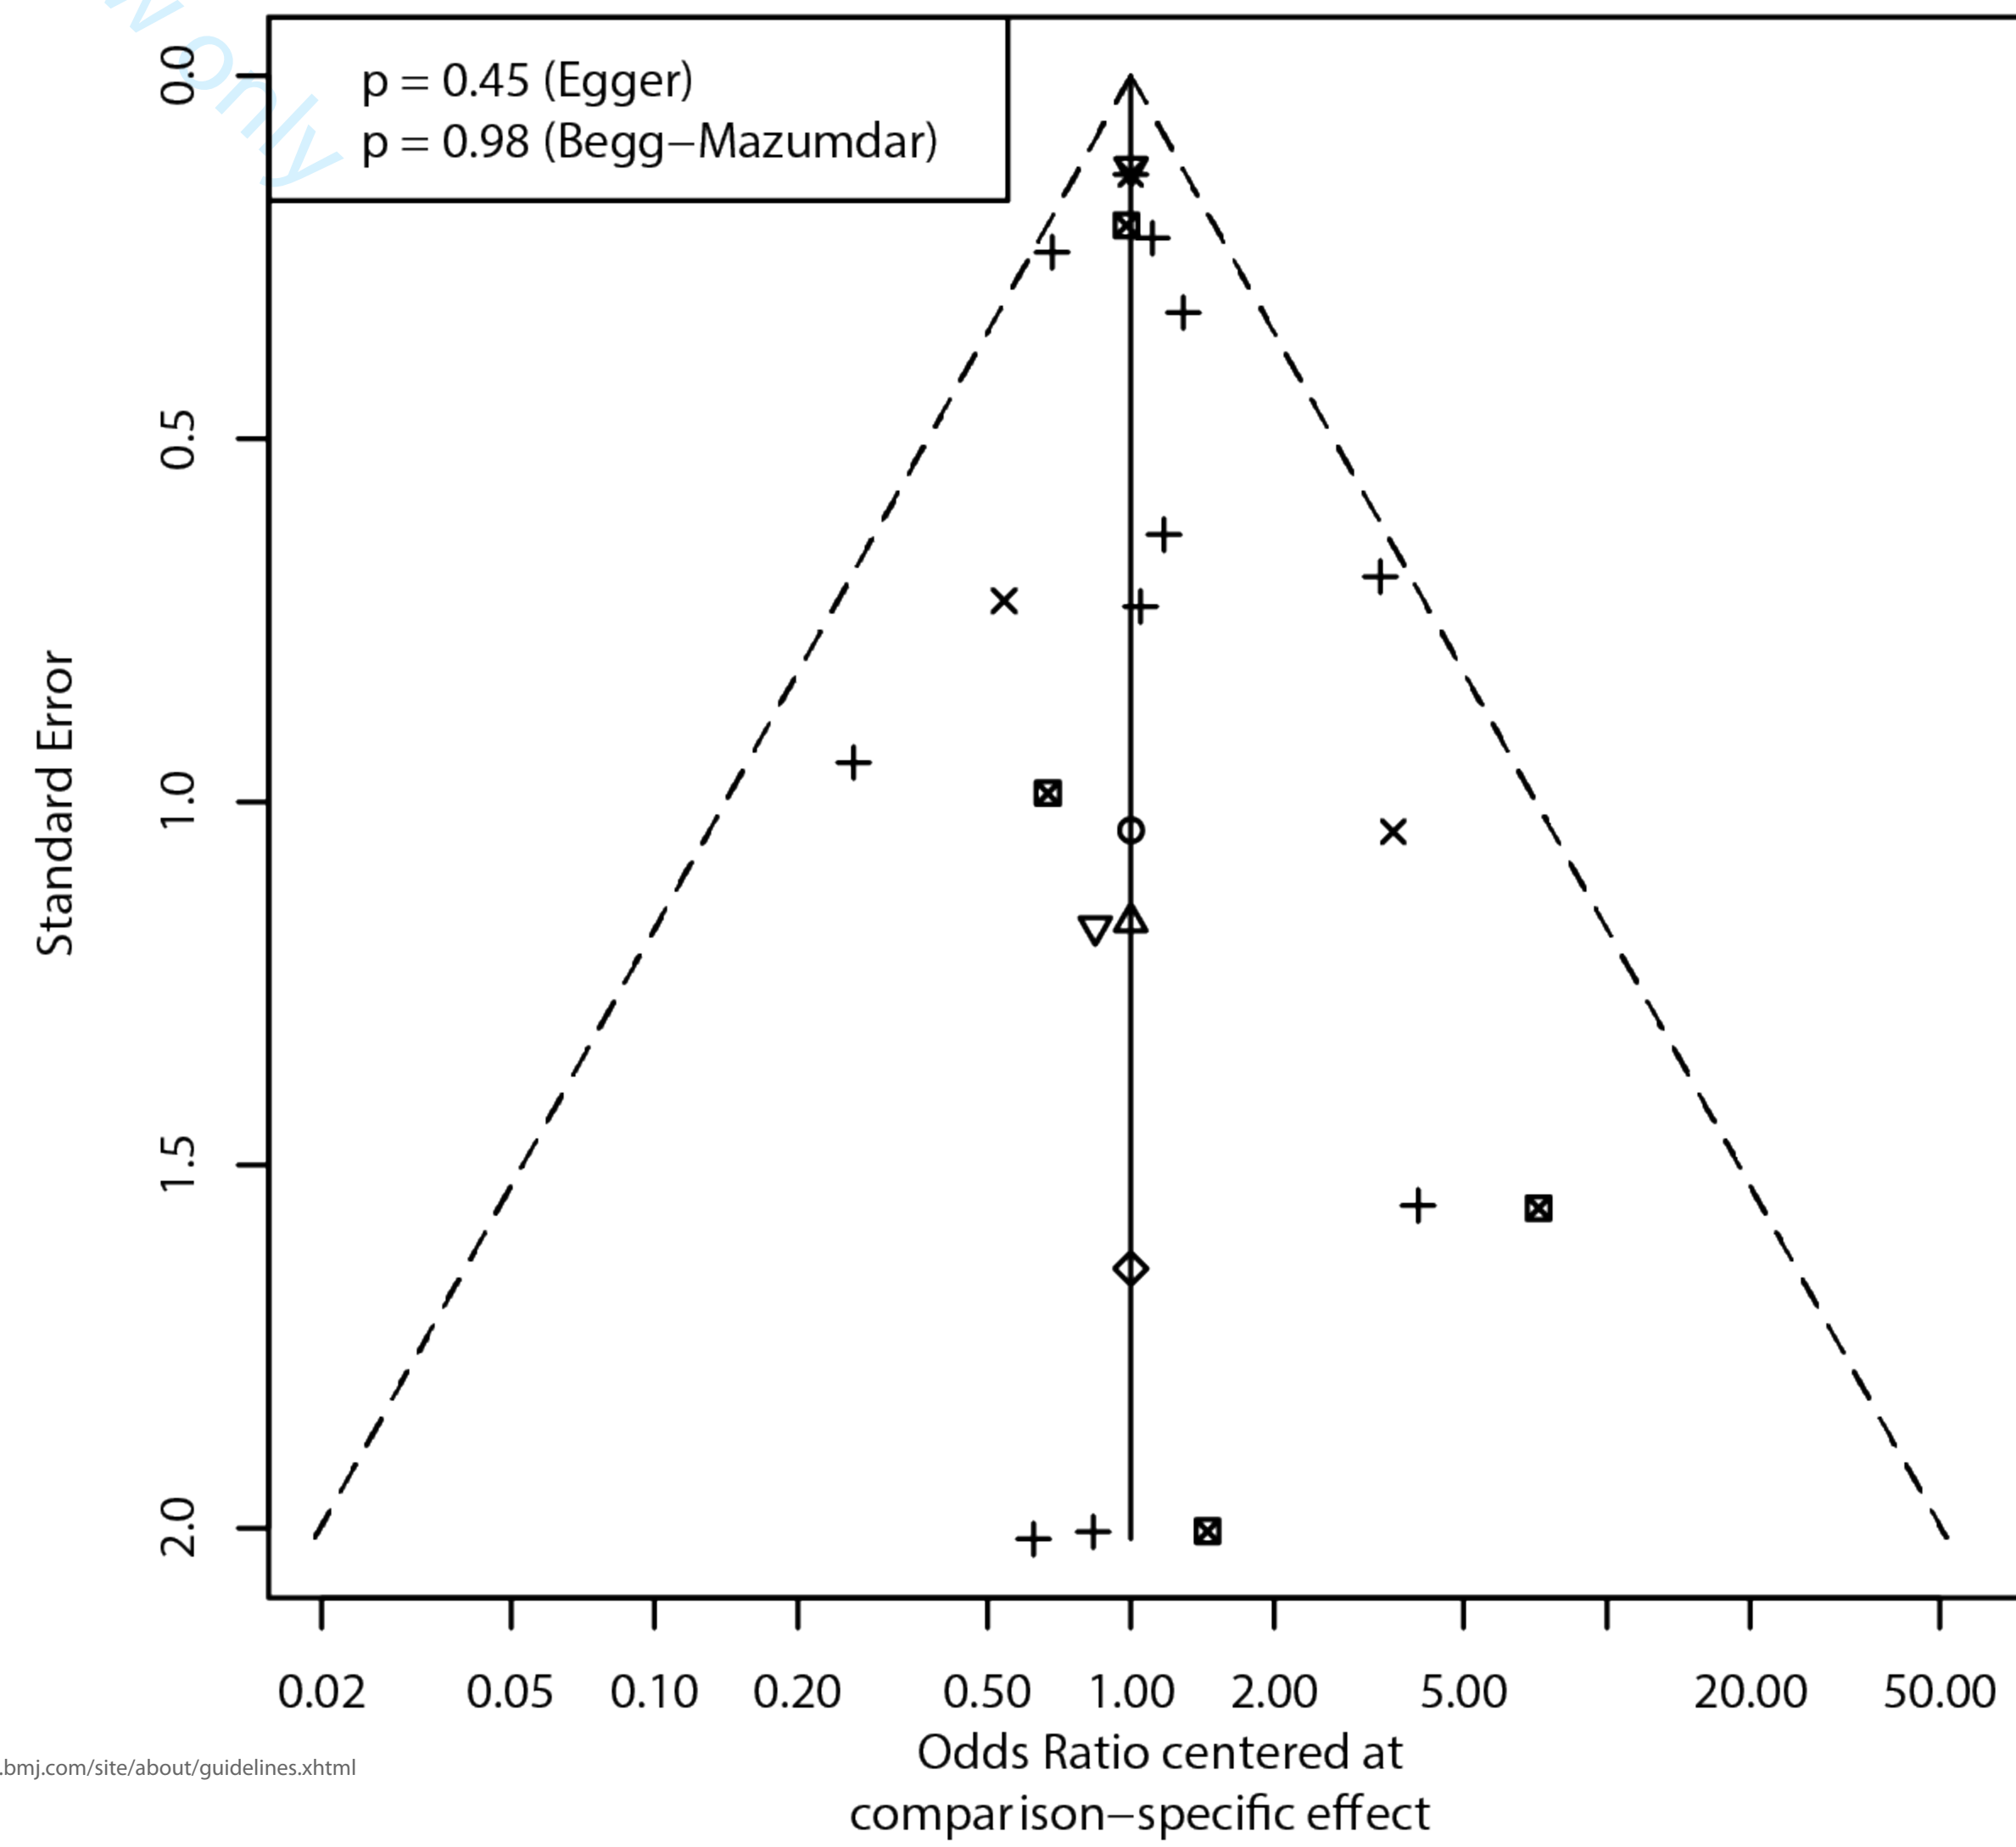

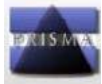

## PRISMA 2020 Checklist

| Section and Topic             | Item # | Checklist item                                                                                                                                                                                                                                                                                       | Location where item is reported |
|-------------------------------|--------|------------------------------------------------------------------------------------------------------------------------------------------------------------------------------------------------------------------------------------------------------------------------------------------------------|---------------------------------|
| <b>TITLE</b>                  |        |                                                                                                                                                                                                                                                                                                      |                                 |
| Title                         | 1      | Identify the report as a systematic review.                                                                                                                                                                                                                                                          | 1-4                             |
| <b>ABSTRACT</b>               |        |                                                                                                                                                                                                                                                                                                      |                                 |
| Abstract                      | 2      | See the PRISMA 2020 for Abstracts checklist.                                                                                                                                                                                                                                                         | 11-41                           |
| <b>INTRODUCTION</b>           |        |                                                                                                                                                                                                                                                                                                      |                                 |
| Rationale                     | 3      | Describe the rationale for the review in the context of existing knowledge.                                                                                                                                                                                                                          | 16-17                           |
| Objectives                    | 4      | Provide an explicit statement of the objective(s) or question(s) the review addresses.                                                                                                                                                                                                               | 20-23                           |
| <b>METHODS</b>                |        |                                                                                                                                                                                                                                                                                                      |                                 |
| Eligibility criteria          | 5      | Specify the inclusion and exclusion criteria for the review and how studies were grouped for the syntheses.                                                                                                                                                                                          | 24-31                           |
| Information sources           | 6      | Specify all databases, registers, websites, organisations, reference lists and other sources searched or consulted to identify studies. Specify the date when each source was last searched or consulted.                                                                                            | 19-22                           |
| Search strategy               | 7      | Present the full search strategies for all databases, registers and websites, including any filters and limits used.                                                                                                                                                                                 | Figure1                         |
| Selection process             | 8      | Specify the methods used to decide whether a study met the inclusion criteria of the review, including how many reviewers screened each record and each report retrieved, whether they worked independently, and if applicable, details of automation tools used in the process.                     | 68-76                           |
| Data collection process       | 9      | Specify the methods used to collect data from reports, including how many reviewers collected data from each report, whether they worked independently, any processes for obtaining or confirming data from study investigators, and if applicable, details of automation tools used in the process. | 75-76                           |
| Data items                    | 10a    | List and define all outcomes for which data were sought. Specify whether all results that were compatible with each outcome domain in each study were sought (e.g. for all measures, time points, analyses), and if not, the methods used to decide which results to collect.                        | 90-92                           |
|                               | 10b    | List and define all other variables for which data were sought (e.g. participant and intervention characteristics, funding sources). Describe any assumptions made about any missing or unclear information.                                                                                         | 94-98                           |
| Study risk of bias assessment | 11     | Specify the methods used to assess risk of bias in the included studies, including details of the tool(s) used, how many reviewers assessed each study and whether they worked independently, and if applicable, details of automation tools used in the process.                                    | 75-76                           |
| Effect measures               | 12     | Specify for each outcome the effect measure(s) (e.g. risk ratio, mean difference) used in the synthesis or presentation of results.                                                                                                                                                                  | 69-73                           |
| Synthesis methods             | 13a    | Describe the processes used to decide which studies were eligible for each synthesis (e.g. tabulating the study intervention characteristics and comparing against the planned groups for each synthesis (item #5)).                                                                                 | 80-82                           |
|                               | 13b    | Describe any methods required to prepare the data for presentation or synthesis, such as handling of missing summary statistics, or data conversions.                                                                                                                                                | 83-84                           |
|                               | 13c    | Describe any methods used to tabulate or visually display results of individual studies and syntheses.                                                                                                                                                                                               | 85-86                           |
|                               | 13d    | Describe any methods used to synthesize results and provide a rationale for the choice(s). If meta-analysis was performed, describe the model(s), method(s) to identify the presence and extent of statistical heterogeneity, and software package(s) used.                                          | 90-93                           |
|                               | 13e    | Describe any methods used to explore possible causes of heterogeneity among study results (e.g. subgroup analysis, meta-regression).                                                                                                                                                                 | 94-98                           |
|                               | 13f    | Describe any sensitivity analyses conducted to assess robustness of the synthesized results.                                                                                                                                                                                                         | 101-105                         |
| Reporting bias assessment     | 14     | Describe any methods used to assess risk of bias due to missing results in a synthesis (arising from reporting biases).                                                                                                                                                                              | 105-108                         |
| Certainty assessment          | 15     | Describe any methods used to assess certainty (or confidence) in the body of evidence for an outcome.                                                                                                                                                                                                | 107-108                         |

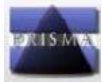

## PRISMA 2020 Checklist

| Section and Topic                              | Item # | Checklist item                                                                                                                                                                                                                                                                       | Location where item is reported |
|------------------------------------------------|--------|--------------------------------------------------------------------------------------------------------------------------------------------------------------------------------------------------------------------------------------------------------------------------------------|---------------------------------|
| <b>RESULTS</b>                                 |        |                                                                                                                                                                                                                                                                                      |                                 |
| Study selection                                | 16a    | Describe the results of the search and selection process, from the number of records identified in the search to the number of studies included in the review, ideally using a flow diagram.                                                                                         | 111-113                         |
|                                                | 16b    | Cite studies that might appear to meet the inclusion criteria, but which were excluded, and explain why they were excluded.                                                                                                                                                          | 114-116                         |
| Study characteristics                          | 17     | Cite each included study and present its characteristics.                                                                                                                                                                                                                            | 118-121                         |
| Risk of bias in studies                        | 18     | Present assessments of risk of bias for each included study.                                                                                                                                                                                                                         | 126-130                         |
| Results of individual studies                  | 19     | For all outcomes, present, for each study: (a) summary statistics for each group (where appropriate) and (b) an effect estimate and its precision (e.g. confidence/credible interval), ideally using structured tables or plots.                                                     | 131-135                         |
| Results of syntheses                           | 20a    | For each synthesis, briefly summarise the characteristics and risk of bias among contributing studies.                                                                                                                                                                               | 118-126                         |
|                                                | 20b    | Present results of all statistical syntheses conducted. If meta-analysis was done, present for each the summary estimate and its precision (e.g. confidence/credible interval) and measures of statistical heterogeneity. If comparing groups, describe the direction of the effect. | 126-130                         |
|                                                | 20c    | Present results of all investigations of possible causes of heterogeneity among study results.                                                                                                                                                                                       | 131-135                         |
|                                                | 20d    | Present results of all sensitivity analyses conducted to assess the robustness of the synthesized results.                                                                                                                                                                           | 137-141                         |
| Reporting biases                               | 21     | Present assessments of risk of bias due to missing results (arising from reporting biases) for each synthesis assessed.                                                                                                                                                              | 143-149                         |
| Certainty of evidence                          | 22     | Present assessments of certainty (or confidence) in the body of evidence for each outcome assessed.                                                                                                                                                                                  | 151-153                         |
| <b>DISCUSSION</b>                              |        |                                                                                                                                                                                                                                                                                      |                                 |
| Discussion                                     | 23a    | Provide a general interpretation of the results in the context of other evidence.                                                                                                                                                                                                    | 169-174                         |
|                                                | 23b    | Discuss any limitations of the evidence included in the review.                                                                                                                                                                                                                      | 176-179                         |
|                                                | 23c    | Discuss any limitations of the review processes used.                                                                                                                                                                                                                                | 181-184                         |
|                                                | 23d    | Discuss implications of the results for practice, policy, and future research.                                                                                                                                                                                                       | 186-192                         |
| <b>OTHER INFORMATION</b>                       |        |                                                                                                                                                                                                                                                                                      |                                 |
| Registration and protocol                      | 24a    | Provide registration information for the review, including register name and registration number, or state that the review was not registered.                                                                                                                                       | 241-247                         |
|                                                | 24b    | Indicate where the review protocol can be accessed, or state that a protocol was not prepared.                                                                                                                                                                                       | 241-247                         |
|                                                | 24c    | Describe and explain any amendments to information provided at registration or in the protocol.                                                                                                                                                                                      | 241-247                         |
| Support                                        | 25     | Describe sources of financial or non-financial support for the review, and the role of the funders or sponsors in the review.                                                                                                                                                        | 236                             |
| Competing interests                            | 26     | Declare any competing interests of review authors.                                                                                                                                                                                                                                   | 250                             |
| Availability of data, code and other materials | 27     | Report which of the following are publicly available and where they can be found: template data collection forms; data extracted from included studies; data used for all analyses; analytic code; any other materials used in the review.                                           | 239                             |

From: Page MJ, McKenzie JE, Bossuyt PM, Boutron I, Hoffmann TC, Mulrow CD, et al. The PRISMA 2020 statement: an updated guideline for reporting systematic reviews. *BMJ* 2021;372:n71. doi: 10.1136/bmj.n71

For peer review only. [http://bmjopen.bmj.com/site/author\\_guidelines.xhtml](http://bmjopen.bmj.com/site/author_guidelines.xhtml)

# BMJ Open

## Effectiveness of lipid-lowering therapy on mortality and major adverse cardiovascular event outcomes in patients undergoing percutaneous coronary intervention: a network meta-analysis of randomized controlled trials

|                                 |                                                                                                                                                                                                                                                                                                                                                                                                                                                                                                                                                                                                                                                                                                                                                                                                                                            |
|---------------------------------|--------------------------------------------------------------------------------------------------------------------------------------------------------------------------------------------------------------------------------------------------------------------------------------------------------------------------------------------------------------------------------------------------------------------------------------------------------------------------------------------------------------------------------------------------------------------------------------------------------------------------------------------------------------------------------------------------------------------------------------------------------------------------------------------------------------------------------------------|
| Journal:                        | <i>BMJ Open</i>                                                                                                                                                                                                                                                                                                                                                                                                                                                                                                                                                                                                                                                                                                                                                                                                                            |
| Manuscript ID                   | bmjopen-2022-070827.R2                                                                                                                                                                                                                                                                                                                                                                                                                                                                                                                                                                                                                                                                                                                                                                                                                     |
| Article Type:                   | Original research                                                                                                                                                                                                                                                                                                                                                                                                                                                                                                                                                                                                                                                                                                                                                                                                                          |
| Date Submitted by the Author:   | 10-Oct-2023                                                                                                                                                                                                                                                                                                                                                                                                                                                                                                                                                                                                                                                                                                                                                                                                                                |
| Complete List of Authors:       | Deng, changjiang; Xinjiang Medical University Affiliated First Hospital, Department of Cardiology<br>Yan, Ju; Shaanxi Provincial People's Hospital<br>Zheng, Ying-Ying; Xinjiang Medical University Affiliated First Hospital<br>Wu, Ting-Ting; Xinjiang Medical University Affiliated First Hospital<br>Pan, Ying; Xinjiang Medical University Affiliated First Hospital, Department of Cardiology<br>Hou, Xian-Geng; Xinjiang Medical University Affiliated First Hospital<br>Wang, Si-Fan; Xinjiang Medical University Affiliated First Hospital, Department of Cardiology<br>Sirajidin, Subinur; Xinjiang Medical University Affiliated First Hospital<br>Aimaitijiang, Mikereyi; Xinjiang Medical University Affiliated First Hospital<br>Xie, Xiang; Xinjiang Medical University Affiliated First Hospital, Department of Cardiology |
| <b>Primary Subject Heading</b>: | Cardiovascular medicine                                                                                                                                                                                                                                                                                                                                                                                                                                                                                                                                                                                                                                                                                                                                                                                                                    |
| Secondary Subject Heading:      | Cardiovascular medicine, Pharmacology and therapeutics                                                                                                                                                                                                                                                                                                                                                                                                                                                                                                                                                                                                                                                                                                                                                                                     |
| Keywords:                       | Coronary heart disease < CARDIOLOGY, Coronary intervention < CARDIOLOGY, Lipid disorders < DIABETES & ENDOCRINOLOGY                                                                                                                                                                                                                                                                                                                                                                                                                                                                                                                                                                                                                                                                                                                        |
|                                 |                                                                                                                                                                                                                                                                                                                                                                                                                                                                                                                                                                                                                                                                                                                                                                                                                                            |

SCHOLARONE™  
Manuscripts

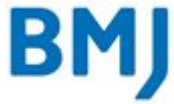

I, the Submitting Author has the right to grant and does grant on behalf of all authors of the Work (as defined in the below author licence), an exclusive licence and/or a non-exclusive licence for contributions from authors who are: i) UK Crown employees; ii) where BMJ has agreed a CC-BY licence shall apply, and/or iii) in accordance with the terms applicable for US Federal Government officers or employees acting as part of their official duties; on a worldwide, perpetual, irrevocable, royalty-free basis to BMJ Publishing Group Ltd ("BMJ") its licensees and where the relevant Journal is co-owned by BMJ to the co-owners of the Journal, to publish the Work in this journal and any other BMJ products and to exploit all rights, as set out in our [licence](#).

The Submitting Author accepts and understands that any supply made under these terms is made by BMJ to the Submitting Author unless you are acting as an employee on behalf of your employer or a postgraduate student of an affiliated institution which is paying any applicable article publishing charge ("APC") for Open Access articles. Where the Submitting Author wishes to make the Work available on an Open Access basis (and intends to pay the relevant APC), the terms of reuse of such Open Access shall be governed by a Creative Commons licence – details of these licences and which [Creative Commons](#) licence will apply to this Work are set out in our licence referred to above.

Other than as permitted in any relevant BMJ Author's Self Archiving Policies, I confirm this Work has not been accepted for publication elsewhere, is not being considered for publication elsewhere and does not duplicate material already published. I confirm all authors consent to publication of this Work and authorise the granting of this licence.

1 **Effectiveness of lipid-lowering therapy on mortality and**  
2 **major adverse cardiovascular event outcomes in patients**  
3 **undergoing percutaneous coronary intervention: a network**  
4 **meta-analysis of randomized controlled trials**

5 Chang-Jiang Deng<sup>1</sup>, Ju Yan<sup>2</sup>, Ying-Ying Zheng<sup>1</sup>, Ting-Ting Wu<sup>1</sup>, Ying Pan<sup>1</sup>, Xian-

6 Geng Hou<sup>1</sup>, Si-Fan Wang<sup>1</sup>, Subinur Sirajidin<sup>1</sup>, Mikereyi Aimaitijiang<sup>1</sup>, Xiang Xie<sup>1</sup>

7 1. Department of Cardiology, The First Affiliated Hospital of Xinjiang Medical

8 University, Urumqi, 830011, P.R. China.

9 2. Department of Cardiology, Shaanxi Provincial People's Hospital, Xi'an, 710000,

10 P.R. China.

11 Correspondence authors:

12 Xiang Xie, No. 137, Liyushan Road, Department of Cardiology, First Affiliated

13 Hospital of Xinjiang Medical University, Urumqi, 830011 P.R., China. Tel:

14 +8609914366168; Email: xiangxie999@sina.com

15 **Abstract**

16 **Background**

17 Emergency percutaneous coronary intervention (PCI) can quickly restore myocardial

18 perfusion after acute coronary syndrome (ACS). Whether and which lipid-lowering

19 regimens are effective in reducing major adverse cardiovascular events (MACEs) and

20 mortality risk after PCI remain unclear.

21

## 22 **Objective**

23 This study assessed the benefits of different lipid-lowering regimens on the risk of  
24 MACEs and mortality in the post-PCI population by network meta-analysis.

## 25 **Methods**

26 Public databases, including PubMed, Embase, and the Cochrane Library, were  
27 searched from inception to August 2022. Randomized controlled trials (RCTs) on  
28 lipid-lowering regimens in post-PCI populations were included and analysed. The  
29 outcomes were the incidence of all-cause mortality and MACEs, whether reported as  
30 dichotomous variables or as hazard ratios (HRs).

## 31 **Results**

32 Thirty-nine RCTs were included. For MACEs, alirocumab plus rosuvastatin (OR:  
33 0.18; 95% CI: 0.07-0.44), evolocumab plus ezetimibe and statins (OR: 0.19; 95% CI:  
34 0.06-0.59), eicosapentaenoic acid (EPA) plus pitavastatin (HR: 0.67; 95% CI: 0.49-  
35 0.96), and icosapent ethyl plus statins (HR: 0.73; 95% CI: 0.62-0.86) had significant  
36 advantages and relatively high rankings. For mortality, rosuvastatin (OR: 0.30; 95%  
37 CI: 0.11-0.84), ezetimibe plus statins (OR: 0.55; 95% CI: 0.43-0.89) and icosapent  
38 ethyl plus statins (OR: 0.66; 95% CI: 0.45-0.96) had significant advantages compared  
39 to the control.

## 40 **Conclusion**

41 EPA, especially icosapent ethyl, plus statins had a beneficial effect on reducing the  
42 risk of MACEs and mortality in post-PCI patients. PCSK9is plus statins were able to



1  
2  
3  
4 43 reduce the risk of MACEs, but the risk of mortality remained unclear.  
5

6 44 **Key words:** lipid-lowering therapy, major adverse cardiovascular events, mortality,  
7  
8  
9 45 network meta-analysis  
10

## 11 46 **Strengths and limitations of this study**

### 12 13 14 47 **The strengths of this study included the following:**

15  
16  
17 48 only RCTs were considered for inclusion with high overall design quality;

18  
19 49 MACE and mortality were adopted as outcomes;

20  
21  
22 50 the subjective factors of the investigator had little influence on the outcomes.  
23

### 24 25 51 **The limitations included the following:**

26  
27 52 this meta-analysis was based on the study level instead of the individual level;

28  
29 53 the criteria for defining MACEs varied among studies;

30  
31  
32 54 many included studies only reported dichotomous outcomes but did not report the HR  
33  
34  
35 55 results.  
36

37  
38 56

39  
40 57

41  
42 58

## 43 59 **Introduction**

44 60 Acute coronary syndrome (ACS) is a term used to refer to a range of conditions

45  
46 61 associated with acute myocardial ischaemia and/or infarction, which are usually due

47  
48 62 to coronary artery occlusion and acute ischaemic necrosis of the myocardium due to

49  
50 63 progression of coronary atherosclerotic lesions(1, 2). Emergency percutaneous

51  
52 64 coronary intervention (PCI) can quickly restore myocardial perfusion(3). Although

53  
54  
55 65 the development of technological and procedural PCI has resulted in substantial  
56  
57  
58

1  
2  
3  
4 66 improvements in clinical outcomes, recurrent coronary events may still occur after  
5  
6 67 PCI(4).  
7  
8  
9 68 The view of "residual cardiovascular risk" was introduced because MACEs still  
10  
11 69 occurs in some patients who underwent PCI during follow-up. PCI can treat focal  
12  
13 70 manifestations of systemic progressive disease, but the residual risk of acute coronary  
14  
15 71 syndrome is largely related to the systemic proatherosclerotic effect of poorly  
16  
17 72 controlled cardiovascular risk factors(4). Lowering lipid levels, especially LDL-C,  
18  
19 73 can halt the progression of coronary atherosclerosis and improve cardiovascular  
20  
21 74 outcomes. Based on this view, it is believed that long-term optimal lipid-lowering  
22  
23 75 therapy is effective in reducing long-term cardiovascular events after PCI. However,  
24  
25 76 this view was still subject to challenges.  
26  
27  
28  
29  
30  
31  
32 77  
33  
34  
35 78 Based on data from the "Korea Acute Myocardial Infarction Registry", the proponents  
36  
37 79 concluded that patients treated with statins had significantly lower rates of MACEs,  
38  
39 80 all-cause death, and cardiac death during the 2-year follow-up period after PCI  
40  
41 81 application(5). However, a study of postoperative follow-up of PCI patients enrolled  
42  
43 82 in the Melbourne Interventional Group registry concluded that statins have no  
44  
45 83 significant beneficial effect on MACEs after PCI(6). The controversy may be  
46  
47 84 explained by two concepts: on the one hand, the optimal lipid reduction target may  
48  
49 85 not be achieved by using single statins(7,8). On the other hand, long-term high-dose  
50  
51 86 application of statins increases the risk of intracerebral haemorrhage and other side  
52  
53  
54  
55  
56  
57  
58  
59  
60

1  
2  
3  
4 87 effects(9,10).  
5  
6

7 88  
8

9 89 There is a consensus on preloading high-dose statins to reduce MACEs in the  
10  
11 90 perioperative period with PCI(11,12). However, there is still insufficient evidence for  
12  
13  
14 91 the continued application of lipid-lowering drugs to reduce the risk of long-term  
15  
16  
17 92 MACEs and mortality. This study assessed the benefits of different lipid-lowering  
18  
19 93 regimens on the risk of MACEs and mortality in the post-PCI population by network  
20  
21  
22 94 meta-analysis.  
23  
24

25 95  
26

## 27 96 **Methods**

28  
29  
30 97 This study was performed in accordance with the Preferred Reporting Items for  
31  
32 98 Systematic Reviews and Meta-Analyses (PRISMA) guidelines. The study was  
33  
34  
35 99 registered with PROSPERO (CRD 42018099600).  
36  
37

## 38 100 **Patient and Public Involvement**

39  
40 101 None  
41  
42

43 102  
44

## 45 103 **Search strategy**

46  
47  
48 104 Public literature databases, including PubMed, Embase, and the Cochrane Library,  
49  
50 105 were searched from inception to August 2022 without language restrictions using the  
51  
52  
53 106 following search terms: (lipid-lowering or statin or simvastatin or rosuvastatin or  
54  
55  
56 107 atorvastatin or fluvastatin or lovastatin or pravastatin or pitavastatin or mevastatin or  
57  
58  
59  
60

1  
2  
3  
4 108 ezetimibe or “eicosapentaenoic acid” or “icosapent ethyl” or “bempedoic acid” or  
5  
6 109 fibrate or bezafibrate or gemfibrozil or fenofibrate or ciprofibrate or evolocumab or  
7  
8  
9 110 alirocumab or evinacumab or volanesorsen or vupanorsen or pelacarsen or olezarsen  
10  
11  
12 111 or inclisiran or olpasiran) and (“percutaneous coronary intervention” or “coronary  
13  
14 112 angioplasty”) and (random\* or randomized or randomized). The details of the full  
15  
16  
17 113 search strategy are listed in the Supplementary file. The references of relevant  
18  
19  
20 114 systematic reviews and meta-analyses were also searched to avoid omissions. The two  
21  
22  
23 115 authors conducted literature retrieval independently, and any conflicts were resolved  
24  
25 116 through discussion with the third author.  
26  
27  
28 117

### 30 118 **Inclusion and exclusion criteria**

31  
32 119 The literature was included if it met the following criteria: 1) the study adopted a  
33  
34  
35 120 randomized controlled study design; 2) the study included patients who underwent  
36  
37  
38 121 PCI surgery or reported the subgroup of the population that underwent PCI; 3) the  
39  
40  
41 122 lipid-lowering regimen was applied to the population of the intervention group; 4) the  
42  
43  
44 123 control group used a different lipid-lowering agent or regimen; and 5) the study  
45  
46  
47 124 reported the outcome of mortality and/or MACEs. The exclusion criteria were as  
48  
49  
50  
51 125 follows: 1) as preloading of statins before PCI was shown to have clear benefits, to  
52  
53  
54 126 determine whether application of lipid-lowering drugs after PCI also had beneficial  
55  
56  
57 127 effects, this work excluded studies on the preloading application of lipid-lowering  
58  
59  
60 128 drugs before PCI; and 2) although high-dose lipid-lowering agents, such as statins,

1  
2  
3  
4 129 have a better lipid-lowering effect, long-term application may bring potential side  
5  
6 130 effects(9,13). Therefore, only studies in which all agents were considered to be  
7  
8  
9 131 applied at reasonable doses were included, and dose–response studies were excluded.  
10  
11  
12 132 In addition, repeatedly published studies, protocols, conference abstracts, reviews,  
13  
14 133 comments and editorials were also excluded.

15  
16  
17 134

18  
19 135 Data extraction and quality assessment

20  
21  
22 136 Two authors independently extracted the information from the included studies. The  
23  
24 137 contents include the name of the first author, publication year, study location, sample  
25  
26  
27 138 size (population that underwent PCI), study abbreviation and registration number,  
28  
29  
30 139 lipid-lowering intervention and control, and follow-up time.

31  
32  
33 140

34  
35 141 The outcomes analysed were the incidence of all-cause mortality and MACEs,  
36  
37 142 whether reported as dichotomous or hazard ratio (HR) statistics based on Cox  
38  
39  
40 143 regression. The MACE outcome was selected to most closely approximate the  
41  
42  
43 144 composite endpoint, including mortality, MI, stroke, coronary revascularization, and  
44  
45  
46 145 restenosis. Study quality was assessed by two investigators using the Cochrane risk of  
47  
48  
49 146 bias assessment tool, which included random sequence generation, allocation  
50  
51 147 concealment, blinding of participants and personnel, blinding of outcome assessment,  
52  
53 148 incomplete outcome data, selective reporting, and other potential biases.

54  
55  
56 149

1  
2  
3  
4 150 Statistical analysis  
5

6 151 We conducted frequentist network meta-analysis (NMA) using random-effects  
7  
8  
9 152 models weighted by the inverse variance method. Odds ratios (ORs) and 95%  
10  
11 153 confidence intervals (CIs) were used for dichotomous outcomes. The hazard ratios  
12  
13  
14 154 (HRs) and 95% CIs based on Cox regression results were also pooled for reporting. If  
15  
16  
17 155 the HR value was not reported but there was a Kaplan–Meier survival curve, the HR  
18  
19 156 value was extracted from the curve by GetData Graph Digitizer software version 2.24.  
20  
21  
22 157 In network plots, the direct comparisons among treatment arms are shown, the end of  
23  
24 158 each line indicates a treatment arm, and the thickness of the lines indicates the number  
25  
26  
27 159 of studies comparing the two treatments. Forest plots were used to describe the  
28  
29  
30 160 network comparison results between each treatment and the control.  
31  
32 161 The restricted maximum likelihood estimation was used to quantify network  
33  
34  
35 162 heterogeneity. The Q statistic was used to assess the sum of statistics for  
36  
37  
38 163 heterogeneity (within designs) and for overall inconsistency (between designs)(14).  
39  
40  
41 164 The ranking probabilities of each regimen were estimated using the surface under the  
42  
43 165 cumulative ranking curve (SUCRA), which was the ratio of the area under the curve  
44  
45  
46 166 to the entire area. A comparison-adjusted funnel plot was used to examine potential  
47  
48 167 publication biases in the NMA. P values of less than 0.05 were considered to indicate  
49  
50  
51 168 statistical significance. The NMA was performed using R language with the  
52  
53  
54 169 “netmeta” package.  
55

56 170  
57  
58  
59  
60

## 171 Results

172 After removing duplicates, we obtained 1588 literature items. After screening the  
 173 titles and abstracts, 1515 irrelevant studies were excluded. Seventy-three articles were  
 174 screened for full text. The following articles were excluded: dose–response studies  
 175 (8); those where no PCI population or subgroup was reported (6); those where no  
 176 mortality or MACE-related outcomes were reported (6); repeated publications (5);  
 177 studies related to preloading of lipid-lowering agents (4); studies unrelated to lipid-  
 178 lowering agents (3); a protocol study (1); and a study with a non-RCT design (1).  
 179 Finally, 39 articles were included, containing 54478 post-PCI patients (15-53) (Figure  
 180 1).

181 **Table 1. The characteristics of included studies**

| Study                       | Location    | Sample size | Abbreviation  | Register ID         | Intervention                                  | Control                | Follow-up# |
|-----------------------------|-------------|-------------|---------------|---------------------|-----------------------------------------------|------------------------|------------|
| Lorenz Räber 2022 [15]      | European    | 300         | PACMAN-AMI    | NCT03067844         | Alirocumab;rosuvastatin                       | Placebo;rosuvastatin   | 52W        |
| Peterson, B. E. 2022 [16]   | Multicenter | 3408        | REDUCE-IT PCI | NCT01492361         | Icosapent ethyl;statins                       | Placebo;statins        | 4.8Y       |
| Remo H.M. Furtado 2022 [17] | Multicenter | 17073       | FOURIER       | NCT01764633         | Evolocumab;statins                            | Placebo;statins        | 2.2Y       |
| Tomoaki Okada 2022 [18]     | Japan       | 102         | -             | UMIN000028729       | Evolocumab;pitavastatin                       | Pitavastatin           | 4W         |
| Yan Hao 2022 [19]           | China       | 136         | -             | -                   | Evolocumab;atorvastatin;ezetimibe             | Ezetimibe;atorvastatin | 3M         |
| Deng YF 2021 [20]           | China       | 90          | -             | -                   | Ezetimibe;atorvastatin                        | Atorvastatin           | 1Y         |
| Sun C 2021 [21]             | China       | 171         | -             | ChiCTR-IPR-17012219 | Ezetimibe;rosuvastatin                        | Rosuvastatin           | 3M         |
| Weifeng He 2020 [22]        | China       | 192         | -             | -                   | Atorvastatin vs. Rosuvastatin vs. Simvastatin | -                      | 6M         |
| Kiyoshi Hibi 2018 [23]      | Japan       | 128         | Ezetimibe-ACS | NCT00549926         | Ezetimibe;pitavastatin                        | Pitavastatin           | 1Y         |
| Eui Im 2017 [24]            | Korea       | 2000        | -             | NCT01557075         | Atorvastatin                                  | Pravastatin            | 1Y         |
| Hagiwara N 2017 [25]        | Japan       | 1734        | HIJ-PROPER    | UMIN000002742       | Ezetimibe;pitavastatin                        | Pitavastatin           | 36M        |
| J Guo 2017 [26]             | China       | 137         | -             | -                   | Rosuvastatin                                  | Control                | 1Y         |

|                                        |             |       |                          |                     |                                                               |                      |       |
|----------------------------------------|-------------|-------|--------------------------|---------------------|---------------------------------------------------------------|----------------------|-------|
| <b>Wang YB 2017 [27]</b>               | China       | 132   | -                        | ChiCTR-IPR-15007035 | Pitavastatin                                                  | Atorvastatin         | 6M    |
| <b>Watanabe T 2017 [28]</b>            | Japan       | 193   | CHERRY                   | UMIN000002815       | EPA;pitavastatin                                              | Pitavastatin         | 6-8M  |
| <b>Zhi Liu 2017 [29]</b>               | China       | 102   | -                        | -                   | Ezetimibe;atorvastatin                                        | atorvastatin 20mg/d  | 1Y    |
| <b>Kazumasa Nosaka 2016 [30]</b>       | Japan       | 241   | -                        | UMIN000016723       | EPA;pitavastatin                                              | Pitavastatin         | 1Y    |
| <b>Kensuke Matsushita 2016 [31]</b>    | Japan       | 118   | Yokohama-ACS             | NCT00549926         | Atorvastatin vs. Pravastatin vs. Pitavastatin vs. Fluvastatin | -                    | 10.3M |
| <b>Christopher P Cannon 2015 [32]</b>  | Multicenter | 12941 | IMPROVE-IT               | NCT00202878         | Ezetimibe;simvastatin                                         | Simvastatin          | 6M    |
| <b>Kenichi Tsujita 2015 [33]</b>       | Multicenter | 246   | PRECISE-IVUS             | NCT01043380         | Ezetimibe;atorvastatin                                        | Atorvastatin         | 1Y    |
| <b>Stephen J. Nicholls 2015 [34]</b>   | Multicenter | 3295  | VISTA-16                 | NCT01130246         | Varespladib;atorvastatin                                      | Placebo;atorvastatin | 6M    |
| <b>Zhang JR 2015 [35]</b>              | China       | 104   | -                        | -                   | Atorvastatin                                                  | Rosuvastatin         | 6M    |
| <b>Mario Leoncin 2014 [36]</b>         | Italy       | 333   | PRATO-ACS                | NCT01185938         | Rosuvastatin                                                  | Control              | 6M    |
| <b>HiroYuki Takano 2013 [37]</b>       | Japan       | 458   | PEARL                    | UMINC000000428      | Pitavastatin                                                  | Control              | 35.5M |
| <b>Tsuyoshi Nozue 2013 [38]</b>        | Japan       | 164   | TRUTH                    | UMIN000004627       | Pitavastatin                                                  | Pravastatin          | 2Y    |
| <b>Jean-Marc Lablanche 2010 [39]</b>   | Multicenter | 887   | CENTAURUS                | NCT00296387         | Rosuvastatin                                                  | Atorvastatin         | 3M    |
| <b>C. Michael Gibson 2009 [40]</b>     | US          | 2868  | PROVE IT-TIMI 22         | NCT00382460         | Atorvastatin                                                  | Pravastatin          | 2Y    |
| <b>Han Yaling 2009 [41]</b>            | China       | 1275  | -                        | NCT00405717         | Atorvastatin                                                  | Pravastatin          | 1Y    |
| <b>Takafumi Hiro 2009 [42]</b>         | Japan       | 307   | JAPAN-ACS                | NCT00242944         | Pitavastatin                                                  | Atorvastatin         | 1Y    |
| <b>Tomotaka Dohi 2009 [43]</b>         | Japan       | 180   | Extended-ESTABLISH trial | -                   | Atorvastatin                                                  | Control              | 4Y    |
| <b>Toru Toi 2009 [44]</b>              | Japan       | 160   | -                        | -                   | Pitavastatin                                                  | Atorvastatin         | 17D   |
| <b>Xu Kai 2007 [45]</b>                | China       | 648   | -                        | -                   | Atorvastatin                                                  | Control              | 2Y    |
| <b>Bae JH 2004 [46]</b>                | Korea       | 205   | -                        | -                   | Atorvastatin                                                  | Control              | 6M    |
| <b>Patrick W J C Serruys 2002 [47]</b> | Multicenter | 1677  | LIPS                     | -                   | Fluvastatin                                                   | Placebo              | 3.9Y  |
| <b>Han J.G.H. Mulder 2000 [48]</b>     | Netherlands | 201   | REGRESS                  | -                   | Pravastatin                                                   | Placebo              | 2Y    |
| <b>Greg C. Flaker 1999 [49]</b>        | Multicenter | 1154  | CARE trial               | -                   | Pravastatin                                                   | Placebo              | 6Y    |
| <b>MICHEL E. BERTRAND 1997 [50]</b>    | France      | 695   | PREDICT                  | -                   | Pravastatin                                                   | Placebo              | 6M    |
| <b>J H O'Keefe Jr 1996 [51]</b>        | US          | 200   | APPLE                    | -                   | Probucol;lovastatin                                           | Placebo              | 6M    |
| <b>Haruhiko Onaka 1994 [52]</b>        | Japan       | 66    | -                        | -                   | Pravastatin                                                   | Control              | 5M    |
| <b>Rakesh Sahni 1991 [53]</b>          | US          | 157   | -                        | -                   | Lovastatin                                                    | Control              | 6M    |

182 Abbreviations: EPA: eicosapentaenoic acid.



1  
2  
3  
4 183 #: Follow-up period: Y: years; M: months; W: weeks; D: days  
5

6 184 Among the included studies, the publication period ranged from 1991 to 2022. The  
7  
8  
9 185 research locations were mainly in Asia (China, Japan and South Korea), Europe  
10  
11 186 (Netherlands, France, and Italy), America, and multiple centres. There were 10 studies  
12  
13  
14 187 with sample sizes greater than 1000 patients. There were also 22 studies with publicly  
15  
16  
17 188 available clinical study registration numbers (Table 1). In terms of design quality, all  
18  
19 189 included studies were RCTs. Therefore, the design quality was generally high. The  
20  
21  
22 190 main factors potentially affecting design quality were the blinding of participants and  
23  
24 191 personnel and blinding of outcome assessment (Figure 2). However, as the desired  
25  
26  
27 192 outcomes were mortality and MACEs, the subjective factors of the investigator had  
28  
29  
30 193 little influence on the outcomes.  
31

32 194 As two studies did not specify the types of statins, the network meta-analysis was  
33  
34  
35 195 divided into two parts. One part was analysed based on specific types of statins, and  
36  
37  
38 196 the other was based on taking statins as a whole. For the dichotomous results of  
39  
40  
41 197 MACEs, the NMA based on specific types of statins included 18 lipid-lowering  
42  
43 198 regimens. The Q test for heterogeneity ( $p = 0.07$ ) and inconsistency ( $p = 0.16$ ) were  
44  
45  
46 199 nonsignificant, indicating no evidence of heterogeneity or inconsistency in the NMA.  
47

48 200 In pairwise comparisons with the control, alirocumab plus rosuvastatin (OR: 0.18;  
49  
50  
51 201 95% CI: 0.07-0.44; SUCRA: 0.94), evolocumab plus atorvastatin and ezetimibe (OR:  
52  
53 202 0.18; 95% CI: 0.05-0.63; SUCRA: 0.90), and ezetimibe plus rosuvastatin (OR: 0.29;  
54  
55  
56 203 95% CI: 0.11-0.76; SUCRA: 0.80) had significant advantages and relatively high  
57  
58  
59  
60

1  
2  
3  
4 204 SUCRA rankings. No potential publication bias was found according to the  
5  
6 205 comparison-adjusted funnel plot (Figure 3).  
7  
8

9 206

10  
11 207 In the NMA based on taking statins as a whole, ten regimens were analysed.  
12  
13  
14 208 Evolocumab plus ezetimibe and statins (OR: 0.19; 95% CI: 0.06-0.59; SUCRA: 0.92),  
15  
16  
17 209 alirocumab plus statins (OR: 0.27; 95% CI: 0.13-0.59; SUCRA: 0.87), and icosapent  
18  
19  
20 210 ethyl plus statins (OR: 0.39; 95% CI: 0.25-0.62; SUCRA: 0.72) had significant  
21  
22 211 advantages and relatively high SUCRA rankings. No potential publication bias was  
23  
24  
25 212 found.  
26

27 213

28  
29  
30 214 For the HR results of MACEs, the NMA based on specific types of statins included  
31  
32  
33 215 nine regimens. The Q test for heterogeneity was nonsignificant ( $p = 0.964$ ) because  
34  
35  
36 216 the network comparisons lacked loops. Therefore, the results were considered  
37  
38  
39 217 consistent. Compared to the control, eicosapentaenoic acid (EPA) plus pitavastatin  
40  
41  
42 218 (HR: 0.67; 95% CI: 0.49-0.96; SUCRA: 0.91), atorvastatin (HR: 0.76; 95% CI: 0.63-  
43  
44  
45 219 0.90; SUCRA: 0.83), and varespladib plus atorvastatin (HR: 0.77; 95% CI: 0.61-0.97;  
46  
47  
48 220 SUCRA: 0.77) had significant advantages and relatively high SUCRA rankings.

49  
50  
51 221 Potential publication bias was not analysed due to the small number of included  
52  
53  
54 222 studies.  
55

56 223

57 224 In the NMA based on taking statins as a whole, seven regimens were analysed. EPA  
58  
59  
60

1  
2  
3  
4 225 plus statins (HR: 0.60; 95% CI: 0.42-0.85; SUCRA: 0.96) and icosapent ethyl plus  
5  
6 226 statins (HR: 0.73; 95% CI: 0.62-0.86; SUCRA: 0.81) had significant advantages over  
7  
8  
9 227 the control.

10  
11  
12 228

13  
14 229 For the dichotomous mortality results, the NMA based on specific types of statins  
15  
16  
17 230 included 17 lipid-lowering regimens. The Q test for heterogeneity ( $p = 0.78$ ) and  
18  
19 231 inconsistency ( $p = 0.99$ ) were nonsignificant. Due to the rare occurrence of events, the  
20  
21  
22 232 results of the comparison had low precision with a large standard error. Compared to  
23  
24  
25 233 the control, only rosuvastatin (OR: 0.30; 95% CI: 0.11-0.84; SUCRA: 0.79) showed a  
26  
27 234 significantly better effect. Ezetimibe plus rosuvastatin had a relatively high SUCRA  
28  
29  
30 235 ranking, but there was no significant difference compared to the control (OR: 0.14;  
31  
32 236 95% CI: 0.02-1.26; SUCRA: 0.86). No potential publication bias was found (Figure  
33  
34  
35 237 4).

36  
37  
38 238

39  
40 239 In the NMA based on taking statins as a whole, nine regimens were analysed.  
41  
42  
43 240 Ezetimibe plus statins (OR: 0.55; 95% CI: 0.43-0.89; SUCRA: 0.75) and icosapent  
44  
45 241 ethyl plus statins (OR: 0.66; 95% CI: 0.45-0.96; SUCRA: 0.63) had significant  
46  
47  
48 242 advantages compared with the blank control group. No potential publication bias  
49  
50  
51 243 existed. NMA analysis was not performed due to the small number of studies  
52  
53 244 reporting HRs for mortality (Figure 5).

54  
55  
56 245

1  
2  
3  
4 **246 Discussion**

5  
6 247 This study analysed the benefits of lipid-lowering therapy on mortality and MACE  
7  
8  
9 248 outcomes in patients who underwent PCI by network meta-analysis. The results  
10  
11 249 showed that several lipid-lowering regimens could reduce the risk of MACEs  
12  
13  
14 250 compared with the blank control. Icosapent ethyl plus statins had the benefit of  
15  
16  
17 251 reducing both the risk of MACEs and mortality. However, EPA plus statins had more  
18  
19 252 advantages in reducing the risk of MACEs. Of note, based on the current evidence,  
20  
21  
22 253 alirocumab and evolocumab plus statins had obvious advantages in reducing the risk  
23  
24  
25 254 of MACEs but had no obvious benefit in reducing the risk of mortality.

26  
27 255

28  
29  
30 256 EPA is a long-chain omega-3 polyunsaturated fatty acid. Long-term intake of EPA  
31  
32 257 can reduce the residual cardiovascular risk to reduce the risk of MACEs(54). In terms  
33  
34  
35 258 of pathological mechanisms, EPA combined with pitavastatin was shown to reduce  
36  
37  
38 259 the lipid volume of coronary artery plaques and total atherosclerotic plaque volume in  
39  
40  
41 260 patients who underwent PCI, which may be the reason for the reduced risk of  
42  
43 261 MACEs(55).

44  
45 262

46  
47  
48 263 Icosapent ethyl is a highly purified and stable eicosapentaenoic acid ethyl ester that  
49  
50  
51 264 has potential higher anti-inflammatory, antioxidant, plaque stability and cell  
52  
53 265 membrane stability effects(56). In the NMA results, icosapent ethyl plus statins had  
54  
55  
56 266 significant benefits for reducing the risk of either mortality or MACEs in patients who

1  
2  
3  
4 267 underwent PCI, which was an ideal regimen for the population.  
5

6  
7 268

8  
9 269 Ezetimibe inhibits the absorption of cholesterol and has a synergistic lipid-lowering  
10  
11 270 pharmacological effect with statins to further reduce the risk of death and MACEs. In  
12  
13 271 particular, when combined with rosuvastatin, ezetimibe has a stronger lipid-lowering  
14  
15 272 effect with a high safety profile without the risk of drug interactions(57). Our NMA  
16  
17 273 results also showed that ezetimibe can reduce the risk of MACEs and mortality.  
18  
19

20  
21  
22 274 According to the guidelines for the management of dyslipidaemia from the European  
23  
24 275 Society of Cardiology and the European Atherosclerosis Society, ezetimibe was  
25  
26 276 recommended if the LDL-C target was not reached(58,59). The American College of  
27  
28 277 Cardiology guidelines also recommend adding ezetimibe when using maximally  
29  
30 278 tolerated statin therapy and if LDL-C levels remained  $\geq 70$  mg/dL(60). These benefits  
31  
32 279 have also been demonstrated in the secondary prevention of PCI.  
33  
34  
35

36  
37  
38 280

39  
40 281 Alirocumab and evolocumab are both proprotein convertase subtilisin/kexin type-9  
41  
42 282 inhibitors (PCSK9is), which can increase the level of LDL receptor in the liver, thus  
43  
44 283 improving the ability of the liver to bind LDL-C and reducing the level of peripheral  
45  
46 284 LDL-C(61). There was also a synergistic lipid-lowering pharmacological effect when  
47  
48 285 PCSK9is were combined with statins that resulted in a significantly reduced LDL-C  
49  
50 286 concentration and atherosclerosis event risk; however, there was still controversy  
51  
52 287 regarding the mortality risk reduction(62). It has been suggested that the powerful  
53  
54  
55  
56  
57  
58  
59  
60

1  
2  
3  
4 288 effect of PCSK9is on reducing LDL-C predisposes patients to hypocholesterolaemia,  
5  
6  
7 289 which will not increase the risk of cerebral haemorrhage. PCSK9is may be the  
8  
9 290 preferred lipid-lowering agents in patients with elevated ICH risk (63-65). On the  
10  
11 291 other hand, PCSK9is did not reduce serum inflammatory factors in one study,  
12  
13  
14 292 suggesting that they may not reduce the risk of residual inflammation in the post-PCI  
15  
16  
17 293 population(66).

18  
19 294  
20  
21  
22 295 In the results of this study, lipid-lowering therapy strategies had general advantages in  
23  
24 296 reducing MACE risk. However, for all-cause mortality, the advantage of lipid-  
25  
26  
27 297 lowering therapy was not obvious. Based on dichotomous outcomes of mortality,  
28  
29  
30 298 some strategies may even have a tendency to increase the mortality risk. This  
31  
32  
33 299 challenges the opinion that lipid-lowering therapy is recommended after PCI(67). A  
34  
35 300 large sample size retrospective study suggests that statins can reduce the risk of all-  
36  
37  
38 301 cause death in patients with coronary artery disease undergoing PCI, regardless of  
39  
40  
41 302 individual cholesterol levels(68). Alternatively, the “lipid paradox” view has been  
42  
43  
44 303 proposed and indicates that higher levels of LDL-C and triglycerides on admission are  
45  
46  
47 304 associated with better clinical outcomes. Especially in patients with ST-elevation  
48  
49  
50 305 myocardial infarction, lower LDL-C levels were associated with worse mortality  
51  
52  
53 306 outcomes(69). However, this view is also controversial(70).

54 307  
55  
56 308 On the other hand, it is possible that the contribution of LDL-C reduction to the risk

1  
2  
3  
4 309 of mortality outcomes is obscured by other confounding factors. For example,  
5  
6 310 inflammatory status may also have had an important impact on patient mortality risk.  
7  
8  
9 311 In a cohort of post-PCI patients with low LDL-C levels, residual inflammatory risk  
10  
11 312 also had a significant effect on overall mortality(71). C-reactive protein can also  
12  
13 313 predict long-term mortality in post-PCI patients independent of LDL-C levels(72). In  
14  
15 314 addition, cardiac remodelling also has an important impact on the survival outcome of  
16  
17 315 post-PCI patients(73).  
18  
19 316 There are several limitations in this study. First, this analysis was based on the study  
20  
21 317 level instead of the individual level, making it difficult to consider the individual  
22  
23 318 confounding factors in the analysis. Second, two included studies did not specify the  
24  
25 319 type of statins, so our study had to be analysed separately according to whether all  
26  
27 320 statins were considered as a whole. Third, the criteria for defining MACEs varied  
28  
29 321 among studies, which contributed to heterogeneity among the study results. Fourth,  
30  
31 322 many included studies only reported dichotomous outcomes but did not report the HR  
32  
33 323 results, resulting in missing relevant data for the analysis.  
34  
35  
36  
37  
38  
39  
40  
41  
42  
43  
44  
45  
46  
47  
48  
49  
50  
51  
52  
53  
54  
55  
56  
57  
58  
59  
60

324

325

326 In conclusion, the results of this study suggested that EPA, especially icosapent ethyl,  
327 plus statins had a beneficial effect on reducing the risk of MACEs and mortality in  
328 post-PCI patients. PCSK9is plus statins were able to reduce the risk of MACEs, but  
329 the effects on the risk of mortality remained unclear.

330

1  
2  
3  
4  
5  
6  
7  
8  
9  
10  
11  
12  
13  
14  
15  
16  
17  
18  
19  
20  
21  
22  
23  
24  
25  
26  
27  
28  
29  
30  
31  
32  
33  
34  
35  
36  
37  
38  
39  
40  
41  
42  
43  
44  
45  
46  
47  
48  
49  
50  
51  
52  
53  
54  
55  
56  
57  
58  
59  
60

331

332

333

### 334 **Acknowledgements**

335 We thank Professor Xiang Xie for his support.

336

### 337 **Author contributions**

338 Chang-Jiang Deng completed the manuscript, Ju Yan, Ting-Ting Wu, Ying Pan, Ying-

339 Ying Zheng guided the data analysis and the production of the figures, Xian-Geng

340 Hou, Si-Fan Wang, Subinur Sirajidin, Mikereyi Aimaitijiang, Xiang Xie read and

341 approved the final manuscript.

342

### 343 **Funding**

344 No funding

345

### 346 **Availability of data and materials**

347 the datasets used or analysed during the current study are available from the  
348 corresponding author on reasonable request.

349

### 350 **Declarations**

351

### 352 **Ethics approval and consent to participate**

353 This study does not involve human participants and ethical approval was not required.

354

### 355 **Consent for publication**

356 not applicable.

357

### 358 **Competing interests**

359 The authors declare that they have no competing interests.

360

361



1  
2  
3  
4 362

5  
6 363

7  
8  
9 364 **References**

10  
11 365 [dataset]1.Yoshihara S (2022) Acute coronary syndrome on non-electrocardiogram-  
12  
13  
14 366 gated contrast-enhanced computed tomography. *World J Radiol*14(2):30-46.

15  
16  
17 367 [dataset]2.Ferri N, Ruscica M, Lupo MG, Vicenzi M, Sirtori CR, Corsini A (2022)  
18  
19 368 Pharmacological rationale for the very early treatment of acute coronary syndrome  
20  
21  
22 369 with monoclonal antibodies anti-PCSK9. *Pharmacol Res* 184:106439.

23  
24 370 [dataset]3.Feng KF, Wu M, Ma LK (2021) Factors Associated with the Prognosis of  
25  
26  
27 371 Patients with Acute Myocardial Infarction and Cardiogenic Shock. *Med Sci Monit*  
28  
29  
30 372 27:e929996.

31  
32 373 [dataset]4.Koskinas KC, Mach F, Raber L (2021) Lipid-lowering therapy and  
33  
34  
35 374 percutaneous coronary interventions. *EuroIntervention* 16(17):1389-403.

36  
37 375 [dataset]5.Kim YH, Her AY, Jeong MH, Kim BK, Shin DH, Kim JS, Ko YG, Choi D,  
38  
39  
40 376 Hong MK, Jang Y (2019) Two-year outcomes of statin therapy in patients with acute  
41  
42  
43 377 myocardial infarction with or without dyslipidemia after percutaneous coronary  
44  
45  
46 378 intervention in the era of new-generation drug-eluting stents within Korean  
47  
48  
49 379 population: Data from the Korea Acute Myocardial Infarction Registry. *Catheter*  
50  
51 380 *Cardiovasc Interv* 93(7):1264-75.

52  
53 381 [dataset]6.Chin KL, Wolfe R, Reid CM, Tonkin A, Hopper I, Brennan A,  
54  
55  
56 382 Andrianopoulos N, Duffy SJ, Clark D, Ajani A, Liew D, Melbourne Interventional G

- 1  
2  
3  
4 383 (2018) Does Statin Benefits Patients with Heart Failure Undergoing Percutaneous  
5  
6 384 Coronary Intervention? Findings from the Melbourne Interventional Group Registry.  
7  
8  
9 385 *Cardiovasc Drugs Ther* 32(1):57-64.  
10  
11 386 [dataset]7.Ray KK, Molemans B, Schoonen WM, Giovas P, Bray S, Kiru G, Murphy  
12  
13  
14 387 J, Banach M, De Servi S, Gaita D, Gouni-Berthold I, Hovingh GK, Jozwiak JJ,  
15  
16  
17 388 Jukema JW, Kiss RG, Kownator S, Iversen HK, Maher V, Masana L, Parkhomenko  
18  
19 389 A, Peeters A, Clifford P, Raslova K, Siostrzonek P, Romeo S, Tousoulis D,  
20  
21  
22 390 Vlachopoulos C, Vrablik M, Catapano AL, Poulter NR (2021) study DVEU-Wide  
23  
24 391 Cross-Sectional Observational Study of Lipid-Modifying Therapy Use in Secondary  
25  
26 392 and Primary Care: the DA VINCI study. *Eur J Prev Cardiol* 28(11):1279-89.  
27  
28  
29 393 [dataset]8.Rea F, Savare L, Corrao G, Mancina G (2021) Adherence to Lipid-  
30  
31  
32 394 Lowering Treatment by Single-Pill Combination of Statin and Ezetimibe. *Adv Ther*  
33  
34  
35 395 38(10):5270-85.  
36  
37  
38 396 [dataset]9.Pandit AK, Kumar P, Kumar A, Chakravarty K, Misra S, Prasad K (2016)  
39  
40 397 High-dose statin therapy and risk of intracerebral hemorrhage: a meta-analysis. *Acta*  
41  
42  
43 398 *Neurol Scand* 134(1):22-8.  
44  
45  
46 399 [dataset]10. Bellosta S, Corsini A (2018) Statin drug interactions and related adverse  
47  
48 400 reactions: an update. *Expert Opin Drug Saf* 17(1):25-37.  
49  
50  
51 401 [dataset]11.Yang X, Lan X, Zhang XL, Han ZL, Yan SM, Wang WX, Xu B, Ge WH  
52  
53 402 (2022) Intensive vs non-intensive statin pretreatment before percutaneous coronary  
54  
55 403 intervention in Chinese patients: A meta-analysis of randomized controlled trials.

- 1  
2  
3  
4 404 World J Clin Cases 10(5):1557-71.  
5  
6  
7 405 [dataset]12.Borovac JA, Leth-Olsen M, Kumric M, D'Amario D, Schwarz K, Glavas  
8  
9 406 D, Bozic J (2022) Efficacy of high-dose atorvastatin or rosuvastatin loading in  
10  
11 407 patients with acute coronary syndrome undergoing percutaneous coronary  
12  
13 408 intervention: a meta-analysis of randomized controlled trials with GRADE  
14  
15 409 qualification of available evidence. Eur J Clin Pharmacol 78(1):111-26.  
16  
17  
18  
19 410 [dataset]13.Vinci P, Panizon E, Tosoni LM, Cerrato C, Pellicori F, Mearelli F,  
20  
21 411 Biasinutto C, Fiotti N, Di Girolamo FG, Biolo G (2021) Statin-Associated Myopathy:  
22  
23 412 Emphasis on Mechanisms and Targeted Therapy. Int J Mol Sci 22(21).  
24  
25  
26  
27 413 [dataset]14.Luo Y, Chaimani A, Furukawa TA, Kataoka Y, Ogawa Y, Cipriani A,  
28  
29 414 Salanti G (2021) Visualizing the evolution of evidence: Cumulative network meta-  
30  
31 415 analyses of new generation antidepressants in the last 40 years. Res Synth Methods  
32  
33 416 12(1):74-85.  
34  
35  
36  
37 417 [dataset]15.Raber L, Ueki Y, Otsuka T, Losdat S, Haner JD, Lonborg J, Fahrni G,  
38  
39 418 Iglesias JF, van Geuns RJ, Ondracek AS, Radu Juul Jensen MD, Zanchin C, Stortecky  
40  
41 419 S, Spirk D, Siontis GCM, Saleh L, Matter CM, Daemen J, Mach F, Heg D,  
42  
43 420 Windecker S, Engstrom T, Lang IM, Koskinas KC, collaborators P-A (2022) Effect  
44  
45 421 of Alirocumab Added to High-Intensity Statin Therapy on Coronary Atherosclerosis  
46  
47 422 in Patients With Acute Myocardial Infarction: The PACMAN-AMI Randomized  
48  
49 423 Clinical Trial. JAMA 327(18):1771-81.  
50  
51  
52  
53 424 [dataset]16.Peterson BE, Bhatt DL, Steg PG, Miller M, Brinton EA, Jacobson TA,  
54  
55  
56  
57  
58  
59  
60

- 1  
2  
3  
4 425 Ketchum SB, Juliano RA, Jiao L, Doyle RT, Jr., Granowitz C, Gibson CM, Pinto D,  
5  
6 426 Giugliano RP, Budoff MJ, Tardif JC, Verma S, Ballantyne CM, Investigators R-I  
7  
8  
9 427 (2022) Treatment With Icosapent Ethyl to Reduce Ischemic Events in Patients With  
10  
11 428 Prior Percutaneous Coronary Intervention: Insights From REDUCE-IT PCI. *J Am*  
12  
13 429 *Heart Assoc* 11(6):e022937.
- 14  
15  
16  
17 430 [dataset]17.Furtado RHM, Fagundes AA, Jr., Oyama K, Zelniker TA, Tang M, Kuder  
18  
19 431 JF, Murphy SA, Hamer A, Wang H, Keech AC, Giugliano RP, Sabatine MS,  
20  
21 432 Bergmark BA (2022) Effect of Evolocumab in Patients With Prior Percutaneous  
22  
23 433 Coronary Intervention. *Circ Cardiovasc Interv* 15(3):e011382.
- 24  
25  
26  
27 434 [dataset]18.Okada T, Miyoshi T, Doi M, Nosaka K, Tsushima R, Ugawa S, Takagi  
28  
29 435 W, Sogo M, Takahashi M, Ito H (2022) Effect of Early Initiation of Evolocumab on  
30  
31 436 Lipoprotein(a) in Patients with Acute Myocardial Infarction: Sub-Analysis of a  
32  
33 437 Randomized Controlled Trial. *J Cardiovasc Dev Dis* 9(5).
- 34  
35  
36  
37 438 [dataset]19.Hao Y, Yang YL, Wang YC, Li J (2022) Effect of the Early Application  
38  
39 439 of Evolocumab on Blood Lipid Profile and Cardiovascular Prognosis in Patients with  
40  
41 440 Extremely High-Risk Acute Coronary Syndrome. *Int Heart J* 63(4):669-77.
- 42  
43  
44  
45 441 [dataset]20.Deng Y, He S, Wang D, Dai C, Xu X, Zhang J (2021) Clinical study of  
46  
47 442 effect of ezetimibe combined with statins on residual lipoprotein cholesterol and  
48  
49 443 MACE events in patients undergoing emergency intervention with acute coronary  
50  
51 444 syndrome. *Chinese Journal of Clinical Pharmacology and Therapeutics* 26(9):1048-  
52  
53  
54  
55 445 52.

- 1  
2  
3  
4 446 [dataset]21.Sun C, Zheng W, Liang L, Liu Z, Sun W, Tang R (2021) Ezetimibe  
5  
6 447 Improves Rosuvastatin Effects on Inflammation and Vascular Endothelial Function in  
7  
8 448 Acute Coronary Syndrome Patients Undergoing PCI. *J Interv Cardiol* 2021:2995602.  
9  
10  
11 449 [dataset]22.He W, Cao M, Li Z (2020) Effects of different doses of atorvastatin,  
12  
13 450 rosuvastatin, and simvastatin on elderly patients with ST-elevation acute myocardial  
14  
15 451 infarction (AMI) after percutaneous coronary intervention (PCI). *Drug Dev Res.*  
16  
17 452 2020;81(5):551-6.  
18  
19 453 [dataset]23.Hibi K, Sonoda S, Kawasaki M, Otsuji Y, Murohara T, Ishii H, Sato K,  
20  
21 454 Koshida R, Ozaki Y, Sata M, Morino Y, Miyamoto T, Amano T, Morita S, Kozuma  
22  
23 455 K, Kimura K, Fujiwara H, Ezetimibe ACSI (2018) Effects of Ezetimibe-Statins  
24  
25 456 Combination Therapy on Coronary Atherosclerosis in Acute Coronary Syndrome.  
26  
27 457 *Circ J* 82(3):757-66.  
28  
29 458 [dataset]24.Im E, Cho YH, Suh Y, Cho DK, Her AY, Kim YH, Lee K, Kang WC,  
30  
31 459 Yun KH, Yoo SY, Cheong SS, Shin DH, Ahn CM, Kim JS, Kim BK, Ko YG, Choi  
32  
33 460 D, Jang Y, Hong MK (2018) High-intensity Statin Treatments in Clinically Stable  
34  
35 461 Patients on Aspirin Monotherapy 12 Months After Drug-eluting Stent Implantation: A  
36  
37 462 Randomized Study. *Rev Esp Cardiol (Engl Ed)* 71(6):423-31.  
38  
39 463 [dataset]25.Hagiwara N, Kawada-Watanabe E, Koyanagi R, Arashi H, Yamaguchi J,  
40  
41 464 Nakao K, Tobaru T, Tanaka H, Oka T, Endoh Y, Saito K, Uchida T, Matsui K,  
42  
43 465 Ogawa H (2017) Low-density lipoprotein cholesterol targeting with pitavastatin +  
44  
45 466 ezetimibe for patients with acute coronary syndrome and dyslipidaemia: the HIJ-

- 1  
2  
3  
4 467 PROPER study, a prospective, open-label, randomized trial. *Eur Heart J*.  
5  
6 468 2017;38(29):2264-76.  
7  
8  
9 469 [dataset]26. Guo J, Zhang WZ, Zhao Q, Wo JS, Cai SL (2017) Study on the effect of  
10  
11 470 different doses of rosuvastatin on ventricular remodeling in patients with acute  
12  
13 471 coronary syndrome after emergency percutaneous coronary intervention. *Eur Rev*  
14  
15 472 *Med Pharmacol Sci* 21(19):4457-63.  
16  
17 473 [dataset]27. Wang YB, Fu XH, Gu XS, Fan WZ, Jiang YF, Hao GZ, Miao Q, Cao J,  
18  
19 474 Fu B, Li Y (2017) Effects of intensive pitavastatin therapy on glucose control in  
20  
21 475 patients with non-ST elevation acute coronary syndrome. *Am J Cardiovasc Dis*  
22  
23 476 7(4):89-96.  
24  
25  
26 477 [dataset]28. Watanabe T, Ando K, Daidoji H, Otaki Y, Sugawara S, Matsui M, Ikeno  
27  
28 478 E, Hirono O, Miyawaki H, Yashiro Y, Nishiyama S, Arimoto T, Takahashi H,  
29  
30 479 Shishido T, Miyashita T, Miyamoto T, Kubota I, investigators Cs (2017) A  
31  
32 480 randomized controlled trial of eicosapentaenoic acid in patients with coronary heart  
33  
34 481 disease on statins. *J Cardiol* 70(6):537-44.  
35  
36 482 [dataset]29. Liu Z, Hao H, Yin C, Chu Y, Li J, Xu D (2017) Therapeutic effects of  
37  
38 483 atorvastatin and ezetimibe compared with double-dose atorvastatin in very elderly  
39  
40 484 patients with acute coronary syndrome. *Oncotarget* 8(25):41582-9.  
41  
42  
43 485 [dataset]30. Nosaka K, Miyoshi T, Iwamoto M, Kajiya M, Okawa K, Tsukuda S,  
44  
45 486 Yokohama F, Sogo M, Nishibe T, Matsuo N, Hirohata S, Ito H, Doi M (2017) Early  
46  
47 487 initiation of eicosapentaenoic acid and statin treatment is associated with better  
48  
49  
50  
51  
52  
53  
54  
55  
56  
57  
58  
59  
60

1  
2  
3  
4 488 clinical outcomes than statin alone in patients with acute coronary syndromes: 1-year  
5  
6 489 outcomes of a randomized controlled study. *Int J Cardiol* 228:173-9.  
7  
8  
9 490 [dataset]31.Matsushita K, Hibi K, Komura N, Akiyama E, Maejima N, Iwahashi N,  
10  
11 491 Tsukahara K, Kosuge M, Ebina T, Sumita S, Umemura S, Kimura K (2016) Effects of  
12  
13 492 4 Statins on Regression of Coronary Plaque in Acute Coronary Syndrome. *Circ J*  
14  
15 493 80(7):1634-43.  
16  
17  
18 494 [dataset]32.Cannon CP, Blazing MA, Giugliano RP, McCagg A, White JA, Theroux  
19  
20 495 P, Darius H, Lewis BS, Ophuis TO, Jukema JW, De Ferrari GM, Ruzyllo W, De  
21  
22 496 Lucca P, Im K, Bohula EA, Reist C, Wiviott SD, Tershakovec AM, Musliner TA,  
23  
24 497 Braunwald E, Califf RM, Investigators I-I (2015) Ezetimibe Added to Statin Therapy  
25  
26 498 after Acute Coronary Syndromes. *N Engl J Med* 372(25):2387-97.  
27  
28  
29 499 [dataset]33.Tsujita K, Sugiyama S, Sumida H, Shimomura H, Yamashita T,  
30  
31 500 Yamanaga K, Komura N, Sakamoto K, Oka H, Nakao K, Nakamura S, Ishihara M,  
32  
33 501 Matsui K, Sakaino N, Nakamura N, Yamamoto N, Koide S, Matsumura T, Fujimoto  
34  
35 502 K, Tsunoda R, Morikami Y, Matsuyama K, Oshima S, Kaikita K, Hokimoto S,  
36  
37 503 Ogawa H, Investigators P-I (2015) Impact of Dual Lipid-Lowering Strategy With  
38  
39 504 Ezetimibe and Atorvastatin on Coronary Plaque Regression in Patients With  
40  
41 505 Percutaneous Coronary Intervention: The Multicenter Randomized Controlled  
42  
43 506 PRECISE-IVUS Trial. *J Am Coll Cardiol* 66(5):495-507.  
44  
45  
46 507 [dataset]34.Nicholls SJ, Kastelein JJ, Schwartz GG, Bash D, Rosenson RS, Cavender  
47  
48 508 MA, Brennan DM, Koenig W, Jukema JW, Nambi V, Wright RS, Menon V, Lincoff  
49  
50  
51  
52  
53  
54  
55  
56  
57  
58  
59  
60

- 1  
2  
3  
4 509 AM, Nissen SE, Investigators V- (2014) Varespladib and cardiovascular events in  
5  
6 510 patients with an acute coronary syndrome: the VISTA-16 randomized clinical trial.  
7  
8  
9 511 JAMA 311(3):252-62.  
10  
11  
12 512 [dataset]35.Zhang JR, Wang DQ, Du J, Qu GS, Du JL, Deng SB, Liu YJ, Cai JX, She  
13  
14 513 Q (2015) Efficacy of Clopidogrel and Clinical Outcome When Clopidogrel Is  
15  
16 514 Coadministered With Atorvastatin and Lansoprazole: A Prospective, Randomized,  
17  
18 515 Controlled Trial. *Medicine (Baltimore)* 94(50):e2262.  
19  
20  
21  
22 516 [dataset]36.Leoncini M, Toso A, Maioli M, Tropeano F, Badia T, Villani S, Bellandi  
23  
24 517 F (2014) Early high-dose rosuvastatin and cardioprotection in the protective effect of  
25  
26 518 rosuvastatin and antiplatelet therapy on contrast-induced acute kidney injury and  
27  
28 519 myocardial damage in patients with acute coronary syndrome (PRATO-ACS) study.  
29  
30  
31 520 *Am Heart J* 168(5):792-7.  
32  
33  
34  
35 521 [dataset]37.Takano H, Mizuma H, Kuwabara Y, Sato Y, Shindo S, Kotooka N,  
36  
37 522 Fujimatsu D, Kobayashi Y, Inoue T, Node K, Komuro I, Investigators PS (2013)  
38  
39 523 Effects of pitavastatin in Japanese patients with chronic heart failure: the Pitavastatin  
40  
41 524 Heart Failure Study (PEARL Study). *Circ J* 77(4):917-25.  
42  
43  
44 525 [dataset]38. Nozue T, Fukui K, Yamamoto S, Kunishima T, Umezawa S, Onishi Y,  
45  
46 526 Tohyama S, Takeyama Y, Morino Y, Yamauchi T, Hibi K, Sozu T, Terashima M,  
47  
48 527 Michishita I, Investigators T (2013) C-reactive protein and future cardiovascular  
49  
50 528 events in statin-treated patients with angina pectoris: the extended TRUTH study. *J*  
51  
52 529 *Atheroscler Thromb* 20(9):717-25.  
53  
54  
55  
56  
57  
58  
59  
60



- 1  
2  
3  
4 530 [dataset]39.Lablanche JM, Leone A, Merkely B, Morais J, Alonso J, Santini M, Eha J,  
5  
6 531 Demil N, Licour M, Tardif JC, investigators C (2010) Comparison of the efficacy of  
7  
8 532 rosuvastatin versus atorvastatin in reducing apolipoprotein B/apolipoprotein A-1 ratio  
9  
10 533 in patients with acute coronary syndrome: results of the CENTAURUS study. Arch  
11  
12 534 Cardiovasc Dis 103(3):160-9.  
13  
14  
15  
16 535 [dataset]40.Gibson CM, Pride YB, Hochberg CP, Sloan S, Sabatine MS, Cannon CP,  
17  
18 536 Group TS (2009) Effect of intensive statin therapy on clinical outcomes among  
19  
20 537 patients undergoing percutaneous coronary intervention for acute coronary syndrome.  
21  
22 538 PCI-PROVE IT: A PROVE IT-TIMI 22 (Pravastatin or Atorvastatin Evaluation and  
23  
24 539 Infection Therapy-Thrombolysis In Myocardial Infarction 22) Substudy. J Am Coll  
25  
26 540 Cardiol 54(24):2290-5.  
27  
28  
29  
30 541 [dataset]41.Han YL, Zhang ZL, Li Y, Wang SL, Jing QM, Wang ZL, Wang DM  
31  
32 542 (2009) Comparison on long-term effects of atorvastatin or pravastatin combined with  
33  
34 543 clopidogrel for patients undergoing coronary stenting: a randomized controlled trial.  
35  
36 544 Zhonghua Yi Xue Za Zhi 89(32):2240-4.  
37  
38  
39  
40 545 [dataset]42.Hiro T, Kimura T, Morimoto T, Miyauchi K, Nakagawa Y, Yamagishi M,  
41  
42 546 Ozaki Y, Kimura K, Saito S, Yamaguchi T, Daida H, Matsuzaki M, Investigators J-A  
43  
44 547 (2009) Effect of intensive statin therapy on regression of coronary atherosclerosis in  
45  
46 548 patients with acute coronary syndrome: a multicenter randomized trial evaluated by  
47  
48 549 volumetric intravascular ultrasound using pitavastatin versus atorvastatin (JAPAN-  
49  
50 550 ACS [Japan assessment of pitavastatin and atorvastatin in acute coronary syndrome]  
51  
52  
53  
54  
55  
56  
57  
58  
59  
60

- 1  
2  
3  
4 551 study). *J Am Coll Cardiol* 54(4):293-302.  
5  
6  
7 552 [dataset]43.Dohi T, Miyauchi K, Okazaki S, Yokoyama T, Yanagisawa N, Tamura H,  
8  
9 553 Kojima T, Yokoyama K, Kurata T, Daida H (2009) Early intensive statin treatment  
10  
11 554 for six months improves long-term clinical outcomes in patients with acute coronary  
12  
13  
14 555 syndrome (Extended-ESTABLISH trial): a follow-up study. *Atherosclerosis*  
15  
16  
17 556 210(2):497-502.  
18  
19  
20 557 [dataset]44.Toi T, Taguchi I, Yoneda S, Kageyama M, Kikuchi A, Tokura M, Kanaya  
21  
22 558 T, Abe S, Matsuda R, Kaneko N (2009) Early effect of lipid-lowering therapy with  
23  
24  
25 559 pitavastatin on regression of coronary atherosclerotic plaque. Comparison with  
26  
27  
28 560 atorvastatin. *Circ J* 73(8):1466-72.  
29  
30  
31 561 [dataset]45.Xu K, Han YL, Jing QM, Wang SL, Ma YY, Luan B, Wang ZL, Wang  
32  
33 562 DM (2007) Lipid-modifying therapy in diabetic patients with high plasma non-high-  
34  
35  
36 563 density lipoprotein cholesterol after percutaneous coronary intervention. *Exp Clin*  
37  
38 564 *Cardiol* 12(1):48-50.  
39  
40  
41 565 [dataset]46.Bae JH, Bassenge E, Kim KY, Synn YC, Park KR, Schwemmer M (2004)  
42  
43 566 Effects of low-dose atorvastatin on vascular responses in patients undergoing  
44  
45  
46 567 percutaneous coronary intervention with stenting. *J Cardiovasc Pharmacol Ther*  
47  
48 568 9(3):185-92.  
49  
50  
51 569 [dataset]47.Serruys PW, de Feyter P, Macaya C, Kokott N, Puel J, Vrolix M, Branzi  
52  
53  
54 570 A, Bertolami MC, Jackson G, Strauss B, Meier B, Lescol Intervention Prevention  
55  
56 571 Study I (2002) Fluvastatin for prevention of cardiac events following successful first  
57  
58  
59  
60

- 1  
2  
3  
4 572 percutaneous coronary intervention: a randomized controlled trial. JAMA  
5  
6 573 287(24):3215-22.  
7  
8  
9 574 [dataset]48.Mulder HJ, Bal ET, Jukema JW, Zwinderman AH, Schalij MJ, van Boven  
10  
11 575 AJ, Brusckhe AV (2000) Pravastatin reduces restenosis two years after percutaneous  
12  
13 576 transluminal coronary angioplasty (REGRESS trial). Am J Cardiol 86(7):742-6.  
14  
15  
16 577 [dataset]49.Flaker GC, Warnica JW, Sacks FM, Moye LA, Davis BR, Rouleau JL,  
17  
18 578 Webel RR, Pfeffer MA, Braunwald E (1999) Pravastatin prevents clinical events in  
19  
20 579 revascularized patients with average cholesterol concentrations. Cholesterol and  
21  
22 580 Recurrent Events CARE Investigators. J Am Coll Cardiol 34(1):106-12.  
23  
24  
25 581 [dataset]50.Bertrand ME, McFadden EP, Fruchart JC, Van Belle E, Commeau P,  
26  
27 582 Grollier G, Bassand JP, Machecourt J, Cassagnes J, Mossard JM, Vacheron A,  
28  
29 583 Castaigne A, Danchin N, Lablanche JM (1997) Effect of pravastatin on angiographic  
30  
31 584 restenosis after coronary balloon angioplasty. The PREDICT Trial Investigators.  
32  
33 585 Prevention of Restenosis by Elisor after Transluminal Coronary Angioplasty. J Am  
34  
35 586 Coll Cardiol 30(4):863-9.  
36  
37  
38 587 [dataset]51.O'Keefe JH, Jr., Stone GW, McCallister BD, Jr., Maddex C, Ligon R,  
39  
40 588 Kacich RL, Kahn J, Caverro PG, Hartzler GO, McCallister BD (1996) Lovastatin plus  
41  
42 589 probucol for prevention of restenosis after percutaneous transluminal coronary  
43  
44 590 angioplasty. Am J Cardiol 77(8):649-52.  
45  
46  
47 591 [dataset]52.Onaka H, Hirota Y, Kita Y, Tsuji R, Ishii K, Ishimura T, Kawamura K  
48  
49 592 (1994) The effect of pravastatin on prevention of restenosis after successful  
50  
51  
52  
53  
54  
55  
56  
57  
58  
59  
60

- 1  
2  
3  
4 593 percutaneous transluminal coronary angioplasty. *Jpn Circ J* 58(2):100-6.  
5  
6 594 [dataset]53.Sahni R, Maniet AR, Voci G, Banka VS (1991) Prevention of restenosis  
7  
8 595 by lovastatin after successful coronary angioplasty. *Am Heart J* 121(6 Pt 1):1600-8.  
9  
10 596 [dataset]54.Kita Y, Watanabe M, Kamon D, Ueda T, Soeda T, Okayama S, Ishigami  
11  
12 597 K, Kawata H, Horii M, Inoue F, Doi N, Okura H, Uemura S, Saito Y (2020) Effects  
13  
14 598 of Fatty Acid Therapy in Addition to Strong Statin on Coronary Plaques in Acute  
15  
16 599 Coronary Syndrome: An Optical Coherence Tomography Study. *J Am Heart Assoc*  
17  
18 600 9(16):e015593.  
19  
20 601 [dataset]55.Zhang BH, Yin F, Qiao YN, Guo SD (2022) Triglyceride and  
21  
22 602 Triglyceride-Rich Lipoproteins in Atherosclerosis. *Front Mol Biosci* 9:909151.  
23  
24 603 [dataset]56. Bhatt DL, Steg PG, Miller M, Brinton EA, Jacobson TA, Ketchum SB,  
25  
26 604 Doyle RT, Jr., Juliano RA, Jiao L, Granowitz C, Tardif JC, Ballantyne CM,  
27  
28 605 Investigators R-I (2019) Cardiovascular Risk Reduction with Icosapent Ethyl for  
29  
30 606 Hypertriglyceridemia. *N Engl J Med* 380(1):11-22.  
31  
32 607 [dataset]57.Strilchuk L, Tocci G, Fogacci F, Cicero AFG (2020) An overview of  
33  
34 608 rosuvastatin/ezetimibe association for the treatment of hypercholesterolemia and  
35  
36 609 mixed dyslipidemia. *Expert Opin Pharmacother* 21(5):531-9.  
37  
38 610 [dataset]58.Mach F, Baigent C, Catapano AL, Koskinas KC, Casula M, Badimon L,  
39  
40 611 Chapman MJ, De Backer GG, Delgado V, Ference BA, Graham IM, Halliday A,  
41  
42 612 Landmesser U, Mihaylova B, Pedersen TR, Riccardi G, Richter DJ, Sabatine MS,  
43  
44 613 Taskinen MR, Tokgozoglul L, Wiklund O, Group ESCSD (2019) 2019 ESC/EAS  
45  
46  
47  
48  
49  
50  
51  
52  
53  
54  
55  
56  
57  
58  
59  
60

- 1  
2  
3  
4 614 Guidelines for the management of dyslipidaemias: lipid modification to reduce  
5  
6 615 cardiovascular risk. *Eur Heart J* 41(1):111-88.  
7  
8  
9 616 [dataset]59.Ray KK, Del Prato S, Muller-Wieland D, Cariou B, Colhoun HM,  
10  
11 617 Tinahones FJ, Domenger C, Letierce A, Mandel J, Samuel R, Bujas-Bobanovic M,  
12  
13 618 Leiter LA (2019) Alirocumab therapy in individuals with type 2 diabetes mellitus and  
14  
15 619 atherosclerotic cardiovascular disease: analysis of the ODYSSEY DM-  
16  
17 620 DYSLIPIDEMIA and DM-INSULIN studies. *Cardiovasc Diabetol* 18(1):149.  
18  
19 621 [dataset]60.Lin Y, Parco C, Karathanos A, Krieger T, Schulze V, Chernyak N, Icks A,  
20  
21 622 Kelm M, Brockmeyer M, Wolff G (2022) Clinical efficacy and safety outcomes of  
22  
23 623 bempedoic acid for LDL-C lowering therapy in patients at high cardiovascular risk: a  
24  
25 624 systematic review and meta-analysis. *BMJ Open* 12(2):e048893.  
26  
27 625 [dataset]61.Wang X, Wen D, Chen Y, Ma L, You C (2022) PCSK9 inhibitors for  
28  
29 626 secondary prevention in patients with cardiovascular diseases: a bayesian network  
30  
31 627 meta-analysis. *Cardiovasc Diabetol* 21(1):107.  
32  
33 628 [dataset]62.Schmidt AF, Carter JL, Pearce LS, Wilkins JT, Overington JP, Hingorani  
34  
35 629 AD, Casas JP (2020) PCSK9 monoclonal antibodies for the primary and secondary  
36  
37 630 prevention of cardiovascular disease. *Cochrane Database Syst Rev* 10:CD011748.  
38  
39 631 [dataset]63.An SJ, Kim TJ, Yoon BW (2017) Epidemiology, Risk Factors, and  
40  
41 632 Clinical Features of Intracerebral Hemorrhage: An Update. *J Stroke* 19(1):3-10.  
42  
43 633 [dataset]64.Pasta A, Cremonini AL, Pisciotta L, Buscaglia A, Porto I, Barra F, Ferrero  
44  
45 634 S, Brunelli C, Rosa GM (2020) PCSK9 inhibitors for treating hypercholesterolemia.  
46  
47  
48  
49  
50  
51  
52  
53  
54  
55  
56  
57  
58  
59  
60

- 1  
2  
3  
4 635 Expert Opin Pharmacother 21(3):353-63.  
5  
6 636 [dataset]65.Sanz-Cuesta, B.E. and J.L. Saver, Lipid-Lowering Therapy and  
7  
8  
9 637 Hemorrhagic Stroke Risk: Comparative Meta-Analysis of Statins and PCSK9  
10  
11 638 Inhibitors. Stroke, 2021. 52(10): p. 3142-3150.  
12  
13  
14 639 [dataset]66.Oesterle A, Laufs U, Liao JK (2017) Pleiotropic Effects of Statins on the  
15  
16 640 Cardiovascular System. Circ Res 120(1):229-43.  
17  
18  
19 641 [dataset]67.Yang T, Fu X, Fu P, Chen J, Xu C, Liu X, Niu T (2021) The value of  
20  
21 642 fragmented QRS in predicting the prognosis of chronic total occlusion patients with  
22  
23 643 myocardial infarction history undergoing percutaneous coronary intervention: A 24-  
24  
25 644 months follow-up study. Clin Cardiol 44(4):537-46.  
26  
27  
28 645 [dataset]68.Ndrepepa G, Holdenrieder S, Cassese S, Xhepa E, Fusaro M, Kastrati A  
29  
30 646 (2020) Hypocholesterolaemia and mortality in patients with coronary artery disease.  
31  
32 647 Eur J Clin Invest 50(2):e13194.  
33  
34  
35 648 [dataset]69.Sia CH, Zheng H, Ho AF, Bulluck H, Chong J, Foo D, Foo LL, Lim PZY,  
36  
37 649 Liew BW, Tan HC, Yeo TC, Chua TSJ, Chan MY, Hausenloy DJ (2020) The Lipid  
38  
39 650 Paradox is present in ST-elevation but not in non-ST-elevation myocardial infarction  
40  
41 651 patients: Insights from the Singapore Myocardial Infarction Registry. Sci Rep  
42  
43 652 10(1):6799.  
44  
45  
46 653 [dataset]70.Sun H, Li Z, Song X, Liu H, Li Y, Hao Y, Teng T, Liu J, Liu J, Zhao D,  
47  
48 654 Zhou X, Yang Q, Investigators C-A (2021) Revisiting the lipid paradox in ST-  
49  
50 655 elevation myocardial infarction in the Chinese population: findings from the CCC-

- 1  
2  
3  
4 656 ACS project. *Eur Heart J Acute Cardiovasc Care* 10(9):978-87.  
5  
6  
7 657 [dataset]71.Guedeney P, Claessen BE, Kalkman DN, Aquino M, Sorrentino S,  
8  
9 658 Giustino G, Farhan S, Vogel B, Sartori S, Montalescot G, Sweeny J, Kovacic JC,  
10  
11 659 Krishnan P, Barman N, Dangas G, Kini A, Baber U, Sharma S, Mehran R (2019)  
12  
13  
14 660 Residual Inflammatory Risk in Patients With Low LDL Cholesterol Levels  
15  
16  
17 661 Undergoing Percutaneous Coronary Intervention. *J Am Coll Cardiol* 73(19):2401-9.  
18  
19 662 [dataset]72.Razzouk L, Muntner P, Bansilal S, Kini AS, Aneja A, Mozes J, Ivan O,  
20  
21  
22 663 Jakkula M, Sharma S, Farkouh ME (2009) C-reactive protein predicts long-term  
23  
24 664 mortality independently of low-density lipoprotein cholesterol in patients undergoing  
25  
26  
27 665 percutaneous coronary intervention. *Am Heart J* 158(2):277-83.  
28  
29  
30 666 [dataset]73.Abbate A, Biondi-Zoccai GG, Appleton DL, Erne P, Schoenenberger  
31  
32 667 AW, Lipinski MJ, Agostoni P, Sheiban I, Vetrovec GW (2008) Survival and cardiac  
33  
34  
35 668 remodeling benefits in patients undergoing late percutaneous coronary intervention of  
36  
37  
38 669 the infarct-related artery: evidence from a meta-analysis of randomized controlled  
39  
40  
41 670 trials. *J Am Coll Cardiol* 51(9):956-64.  
42  
43  
44 671  
45  
46 672 **Figure 1.** Flowchart of the study selection process for eligible studies  
47  
48 673 **Figure 2.** Methodological quality assessment of included studies  
49  
50  
51 674 **Figure 3.** Network plots of comparisons for major outcomes included in the analyses.  
52  
53 675 A: dichotomous results of MACE based on specific types of statins; B: dichotomous  
54  
55  
56 676 results of MACE based on taking statins as a whole; C: hazard ratio results of MACE  
57  
58  
59  
60

1  
2  
3  
4 677 based on specific types of statins; D: hazard ratio results of MACE based on taking  
5  
6 678 statins as a whole; E: dichotomous results of mortality based on specific types of  
7  
8  
9 679 statins; F: dichotomous results of mortality based on taking statins as a whole.  
10  
11 680 **Figure 4.** Forest plots of lipid-lowering therapy compare to control for outcomes in  
12  
13  
14 681 network meta-analysis with SUCRA ranking results. A: dichotomous results of  
15  
16 682 MACE based on specific types of statins; B: dichotomous results of MACE based on  
17  
18 683 taking statins as a whole; C: hazard ratio results of MACE based on specific types of  
19  
20 684 statins; D: hazard ratio results of MACE based on taking statins as a whole; E:  
21  
22 685 dichotomous results of mortality based on specific types of statins; F: dichotomous  
23  
24 686 results of mortality based on taking statins as a whole.

25  
26  
27  
28  
29 687 **Figure 5.** The comparison-adjusted funnel plot for assessing all main outcomes. A:  
30  
31 688 dichotomous results of MACE based on specific types of statins; B: dichotomous  
32  
33 689 results of MACE based on taking statins as a whole; C: dichotomous results of  
34  
35 690 mortality based on specific types of statins; D: dichotomous results of mortality based  
36  
37 691 on taking statins as a whole.

38  
39  
40  
41  
42 692

43  
44  
45 693

46  
47  
48 694

49  
50  
51 695

52  
53  
54 696

55  
56  
57 697



1  
2  
3  
4 698  
5  
6  
7 699  
8  
9 700  
10  
11 701  
12  
13  
14 702  
15  
16  
17 703  
18  
19  
20 704  
21  
22 705 **Authors and Afliations**  
23  
24  
25 706 Chang-Jiang Deng, Ju Yan, Ying-Ying Zheng, Ting-Ting Wu, Ying Pan, Xian-Geng  
26  
27 707 Hou, Si-Fan Wang, Subinur·Sirajidin, Mikereyi·Sirajidin, Xiang Xie  
28  
29 708 Chang-Jiang Deng Xian-Geng Hou  
30  
31 709 1187229853@qq.com 380138554@qq.com  
32  
33 710 Ju Yan Si-Fan Wang  
34  
35 711 yyjj2017@163.com 562654119@qq.com  
36  
37 712 Ying-Ying Zheng Subinur·Sirajidin  
38  
39 713 zhengying527@163.com 496568064@qq.com  
40  
41 714 Ting-TingWu Mikereyi·Aimaitijiang  
42  
43 715 1255723526@qq.com 3195676352@qq.com  
44  
45 716 Ying Pan Xiang Xie  
46  
47 717 2475854195@qq.com xiangxie999@sina.com  
48  
49 718 Department of Cardiology, The First Affiliated Hospital of Xinjiang Medical  
50  
51  
52 719 University, Urumqi, 830011, P.R. China.  
53  
54  
55  
56  
57  
58  
59  
60

**PRISMA 2020 flow diagram for new systematic reviews which included searches of databases and registers only**

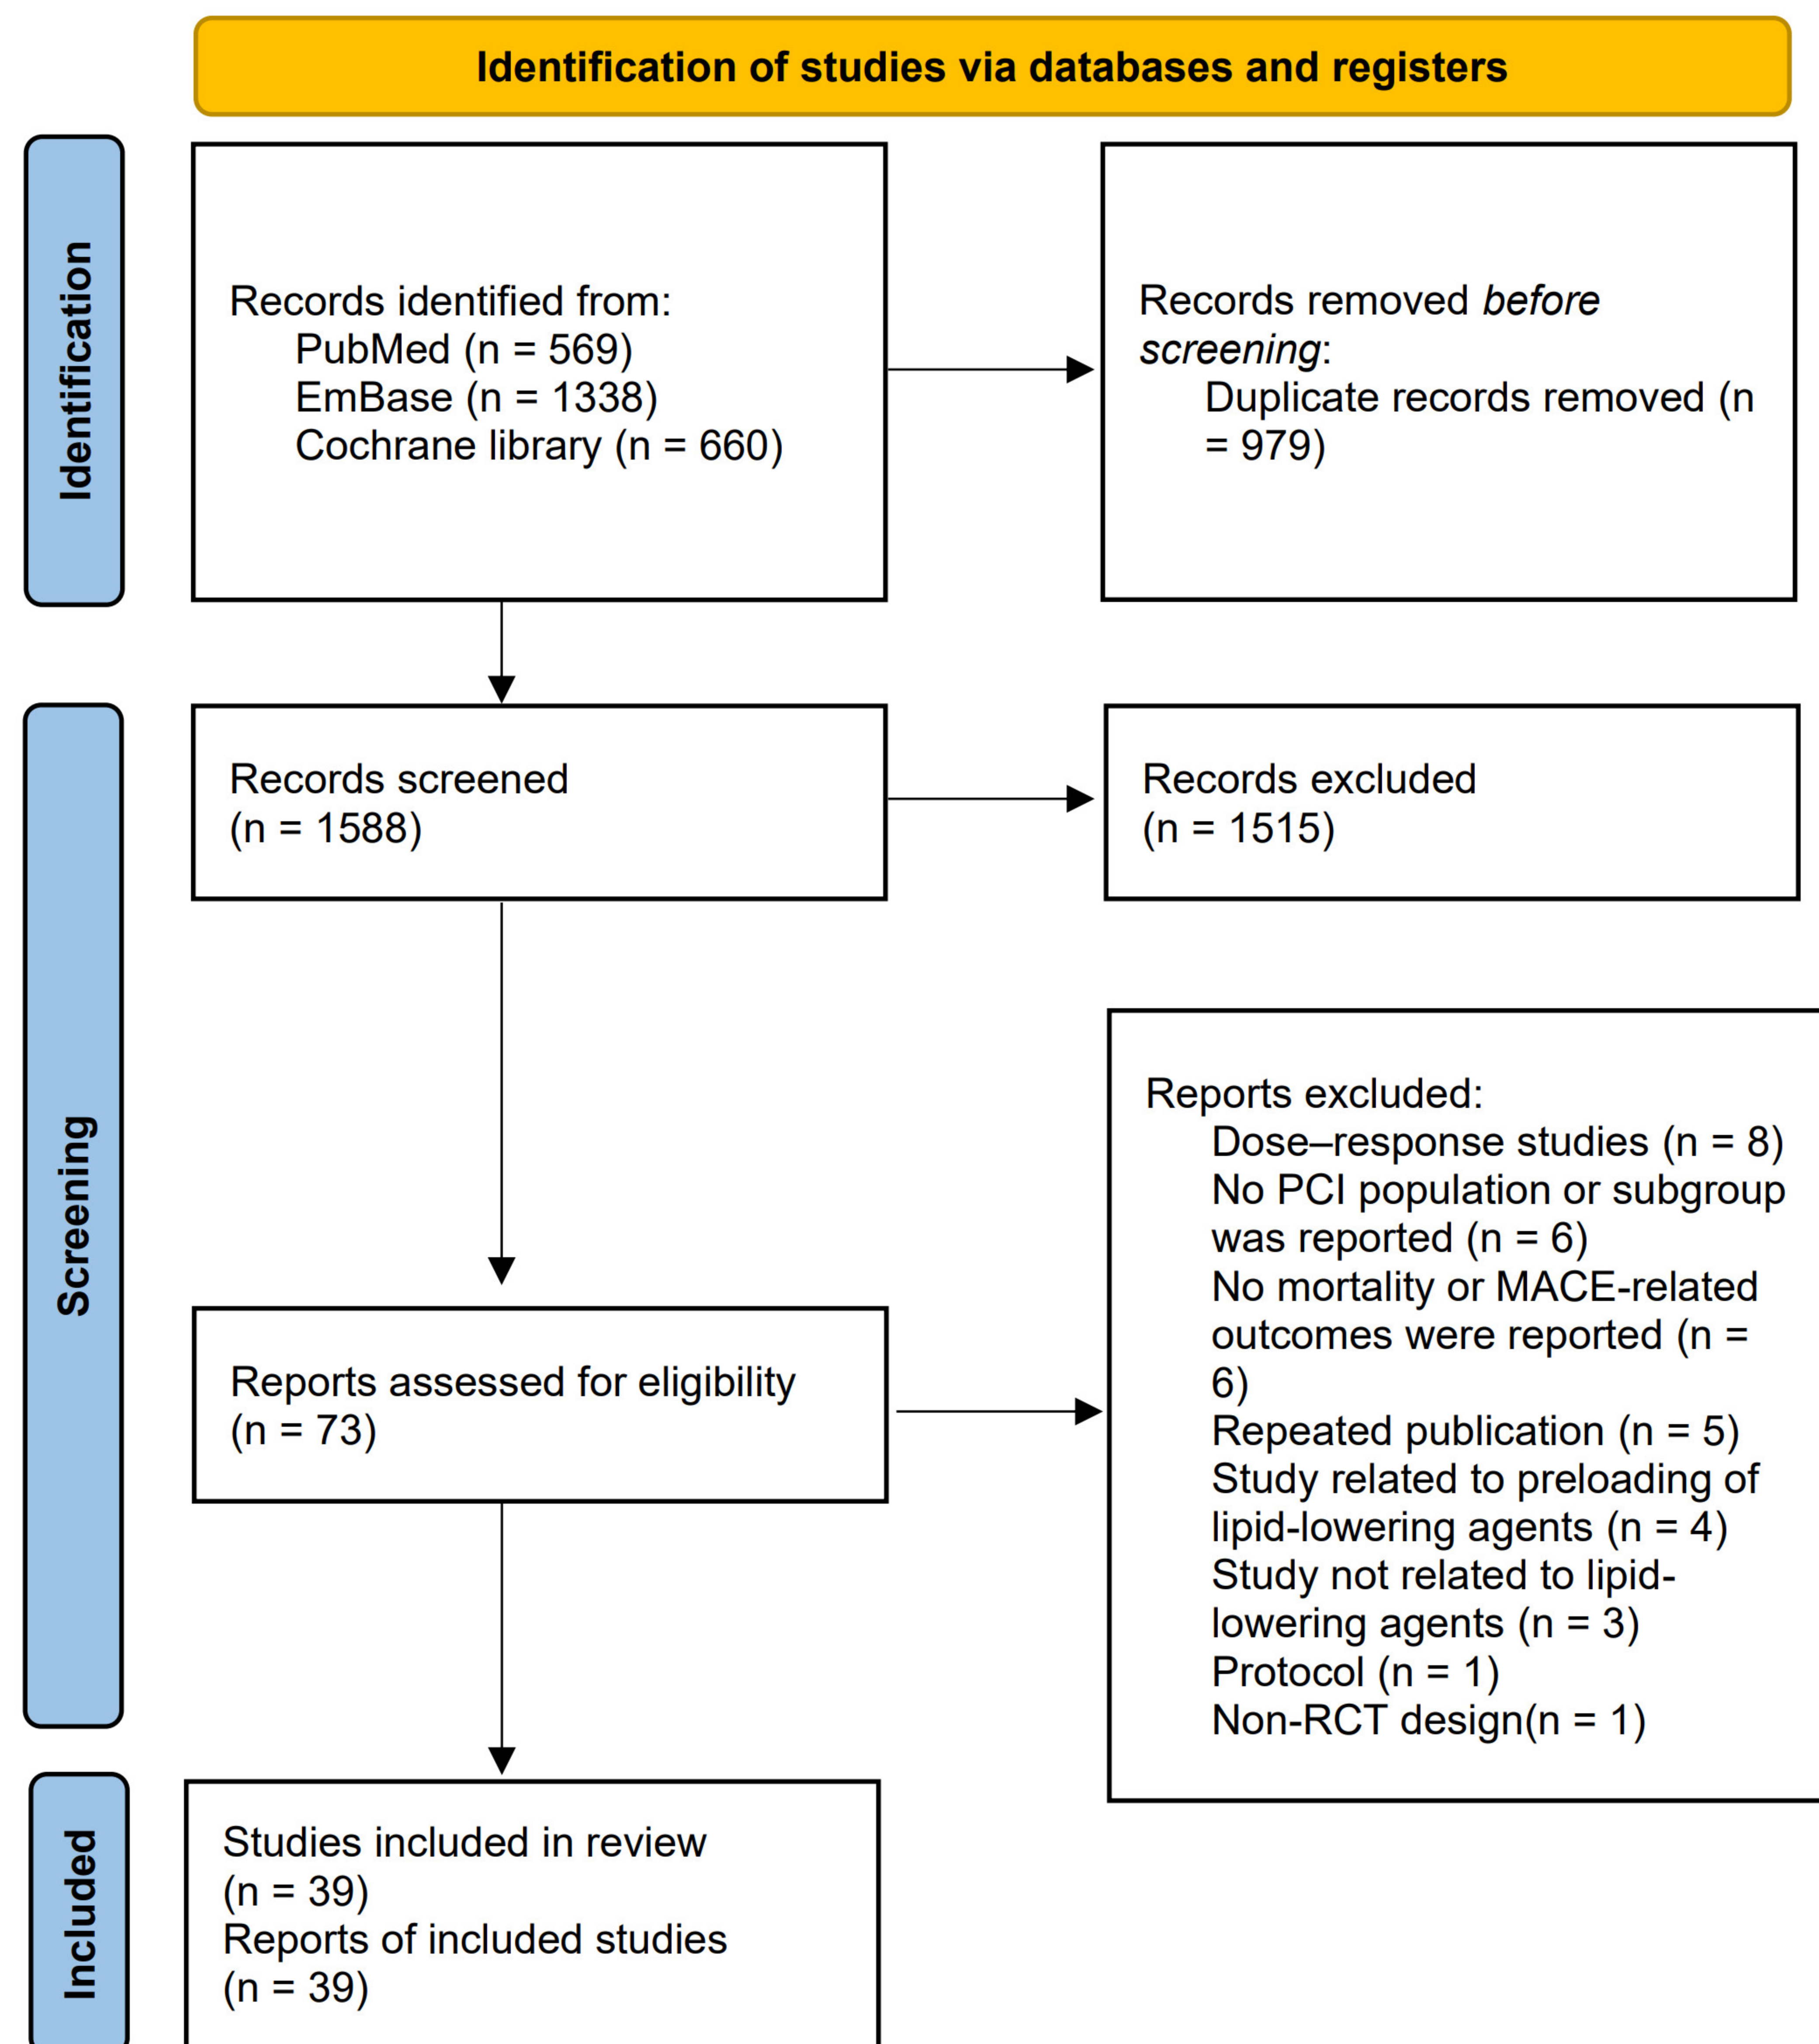

\*Consider, if feasible to do so, reporting the number of records identified from each database or register searched (rather than the total number across all databases/registers).

\*\*If automation tools were used, indicate how many records were excluded by a human and how many were excluded by automation tools.

From: Page MJ, McKenzie JE, Bossuyt PM, Boutron I, Hoffmann TC, Mulrow CD, et al. The PRISMA 2020 statement: an updated guideline for reporting systematic reviews. *BMJ* 2021;372:n71. doi: 10.1136/bmj.n71

For more information, visit: <http://www.prisma-statement.org/>

1  
2  
3  
4  
5  
6  
7  
8  
9  
10  
11  
12  
13  
14  
15  
16  
17  
18  
19  
20  
21  
22  
23  
24  
25  
26  
27  
28  
29  
30  
31  
32  
33  
34  
35  
36  
37  
38  
39  
40  
41  
42  
43  
44  
45  
46  
47  
48  
49  
50  
51  
52  
53  
54  
55  
56  
57  
58  
59  
60

|                            | Random sequence generation (selection bias) | Allocation concealment (selection bias) | Blinding of participants and personnel (performance bias) | Blinding of outcome assessment (detection bias) | Incomplete outcome data (attrition bias) | Selective reporting (reporting bias) | Other bias |
|----------------------------|---------------------------------------------|-----------------------------------------|-----------------------------------------------------------|-------------------------------------------------|------------------------------------------|--------------------------------------|------------|
| Bae JH 2004                | ?                                           | ?                                       | -                                                         | -                                               | +                                        | ?                                    | +          |
| C. Michael Gibson 2009     | +                                           | +                                       | +                                                         | +                                               | +                                        | +                                    | +          |
| Christopher P Cannon 2015  | +                                           | +                                       | +                                                         | +                                               | +                                        | +                                    | +          |
| Deng YF 2021               | ?                                           | ?                                       | -                                                         | -                                               | +                                        | +                                    | +          |
| Eui Im 2017                | +                                           | +                                       | -                                                         | +                                               | +                                        | +                                    | +          |
| Greg C. Flaker 1999        | +                                           | +                                       | +                                                         | +                                               | +                                        | +                                    | +          |
| Hagiwara N 2017            | +                                           | ?                                       | -                                                         | +                                               | +                                        | +                                    | +          |
| Han J.G.H. Mulder 2000     | +                                           | +                                       | +                                                         | +                                               | +                                        | +                                    | +          |
| Han Yaling 2009            | +                                           | +                                       | -                                                         | -                                               | +                                        | +                                    | +          |
| Haruhiko Onaka 1994        | ?                                           | ?                                       | -                                                         | -                                               | +                                        | +                                    | +          |
| Hiroyuki Takano 2013       | +                                           | +                                       | -                                                         | +                                               | +                                        | +                                    | +          |
| Jean-Marc Lablanche 2010   | +                                           | +                                       | +                                                         | +                                               | +                                        | +                                    | +          |
| J Guo 2017                 | +                                           | +                                       | -                                                         | -                                               | +                                        | ?                                    | +          |
| J H O'Keefe Jr 1996        | +                                           | +                                       | +                                                         | +                                               | +                                        | +                                    | +          |
| Kazumasa Nosaka 2016       | +                                           | ?                                       | -                                                         | +                                               | +                                        | +                                    | +          |
| Kenichi Tsujita 2015       | +                                           | +                                       | -                                                         | +                                               | +                                        | +                                    | +          |
| Kensuke Matsushita 2016    | ?                                           | ?                                       | -                                                         | -                                               | +                                        | +                                    | +          |
| Kiyoshi Hibi 2018          | +                                           | +                                       | -                                                         | +                                               | +                                        | +                                    | +          |
| Lorenz Räber 2022          | +                                           | +                                       | +                                                         | +                                               | +                                        | +                                    | +          |
| Mario Leoncin 2014         | +                                           | ?                                       | -                                                         | -                                               | +                                        | +                                    | +          |
| MICHEL E. BERTRAND 1997    | +                                           | +                                       | +                                                         | +                                               | +                                        | +                                    | +          |
| Patrick W J C Serruys 2002 | +                                           | +                                       | +                                                         | +                                               | +                                        | +                                    | +          |
| Peterson, B. E. 2022       | +                                           | +                                       | +                                                         | +                                               | +                                        | +                                    | +          |
| Rakesh Sahni 1991          | ?                                           | ?                                       | -                                                         | -                                               | +                                        | +                                    | +          |
| Remo H.M. Furtado 2022     | +                                           | +                                       | ?                                                         | +                                               | +                                        | +                                    | +          |
| Stephen J. Nicholls 2015   | +                                           | +                                       | +                                                         | +                                               | +                                        | +                                    | +          |
| Sun C 2021                 | +                                           | ?                                       | -                                                         | -                                               | +                                        | ?                                    | +          |
| Takafumi Hiro 2009         | +                                           | +                                       | -                                                         | +                                               | +                                        | +                                    | +          |
| Tomoaki Okada 2022         | +                                           | +                                       | +                                                         | ?                                               | +                                        | +                                    | +          |
| Tomotaka Dohi 2009         | +                                           | ?                                       | -                                                         | -                                               | +                                        | +                                    | +          |
| Toru Toi 2009              | ?                                           | +                                       | -                                                         | ?                                               | +                                        | ?                                    | +          |
| Tsuyoshi Nozue 2013        | +                                           | +                                       | -                                                         | -                                               | +                                        | ?                                    | +          |
| Wang YB 2017               | +                                           | ?                                       | -                                                         | -                                               | +                                        | +                                    | +          |
| Watanabe T 2017            | +                                           | ?                                       | -                                                         | -                                               | +                                        | +                                    | +          |
| Weifeng He 2020            | +                                           | +                                       | ?                                                         | ?                                               | +                                        | +                                    | +          |
| Xu Kai 2007                | ?                                           | ?                                       | -                                                         | -                                               | +                                        | +                                    | +          |
| Yan Hao 2022               | ?                                           | ?                                       | -                                                         | -                                               | +                                        | +                                    | +          |
| Zhang JR 2015              | +                                           | ?                                       | -                                                         | -                                               | +                                        | ?                                    | +          |
| Zhi Liu 2017               | +                                           | ?                                       | -                                                         | -                                               | +                                        | +                                    | ?          |



Low risk of bias

Unclear risk of bias

High risk of bias

1  
2  
3  
4  
5  
6  
7  
8  
9  
10  
11  
12  
13  
14  
15  
16  
17  
18  
19  
20  
21  
22  
23  
24  
25  
26  
27  
28  
29  
30  
31  
32  
33  
34  
35  
36  
37  
38  
39  
40  
41  
42  
43  
44  
45  
46  
47  
48  
49  
50  
51  
52  
53  
54  
55  
56  
57  
58  
59  
60

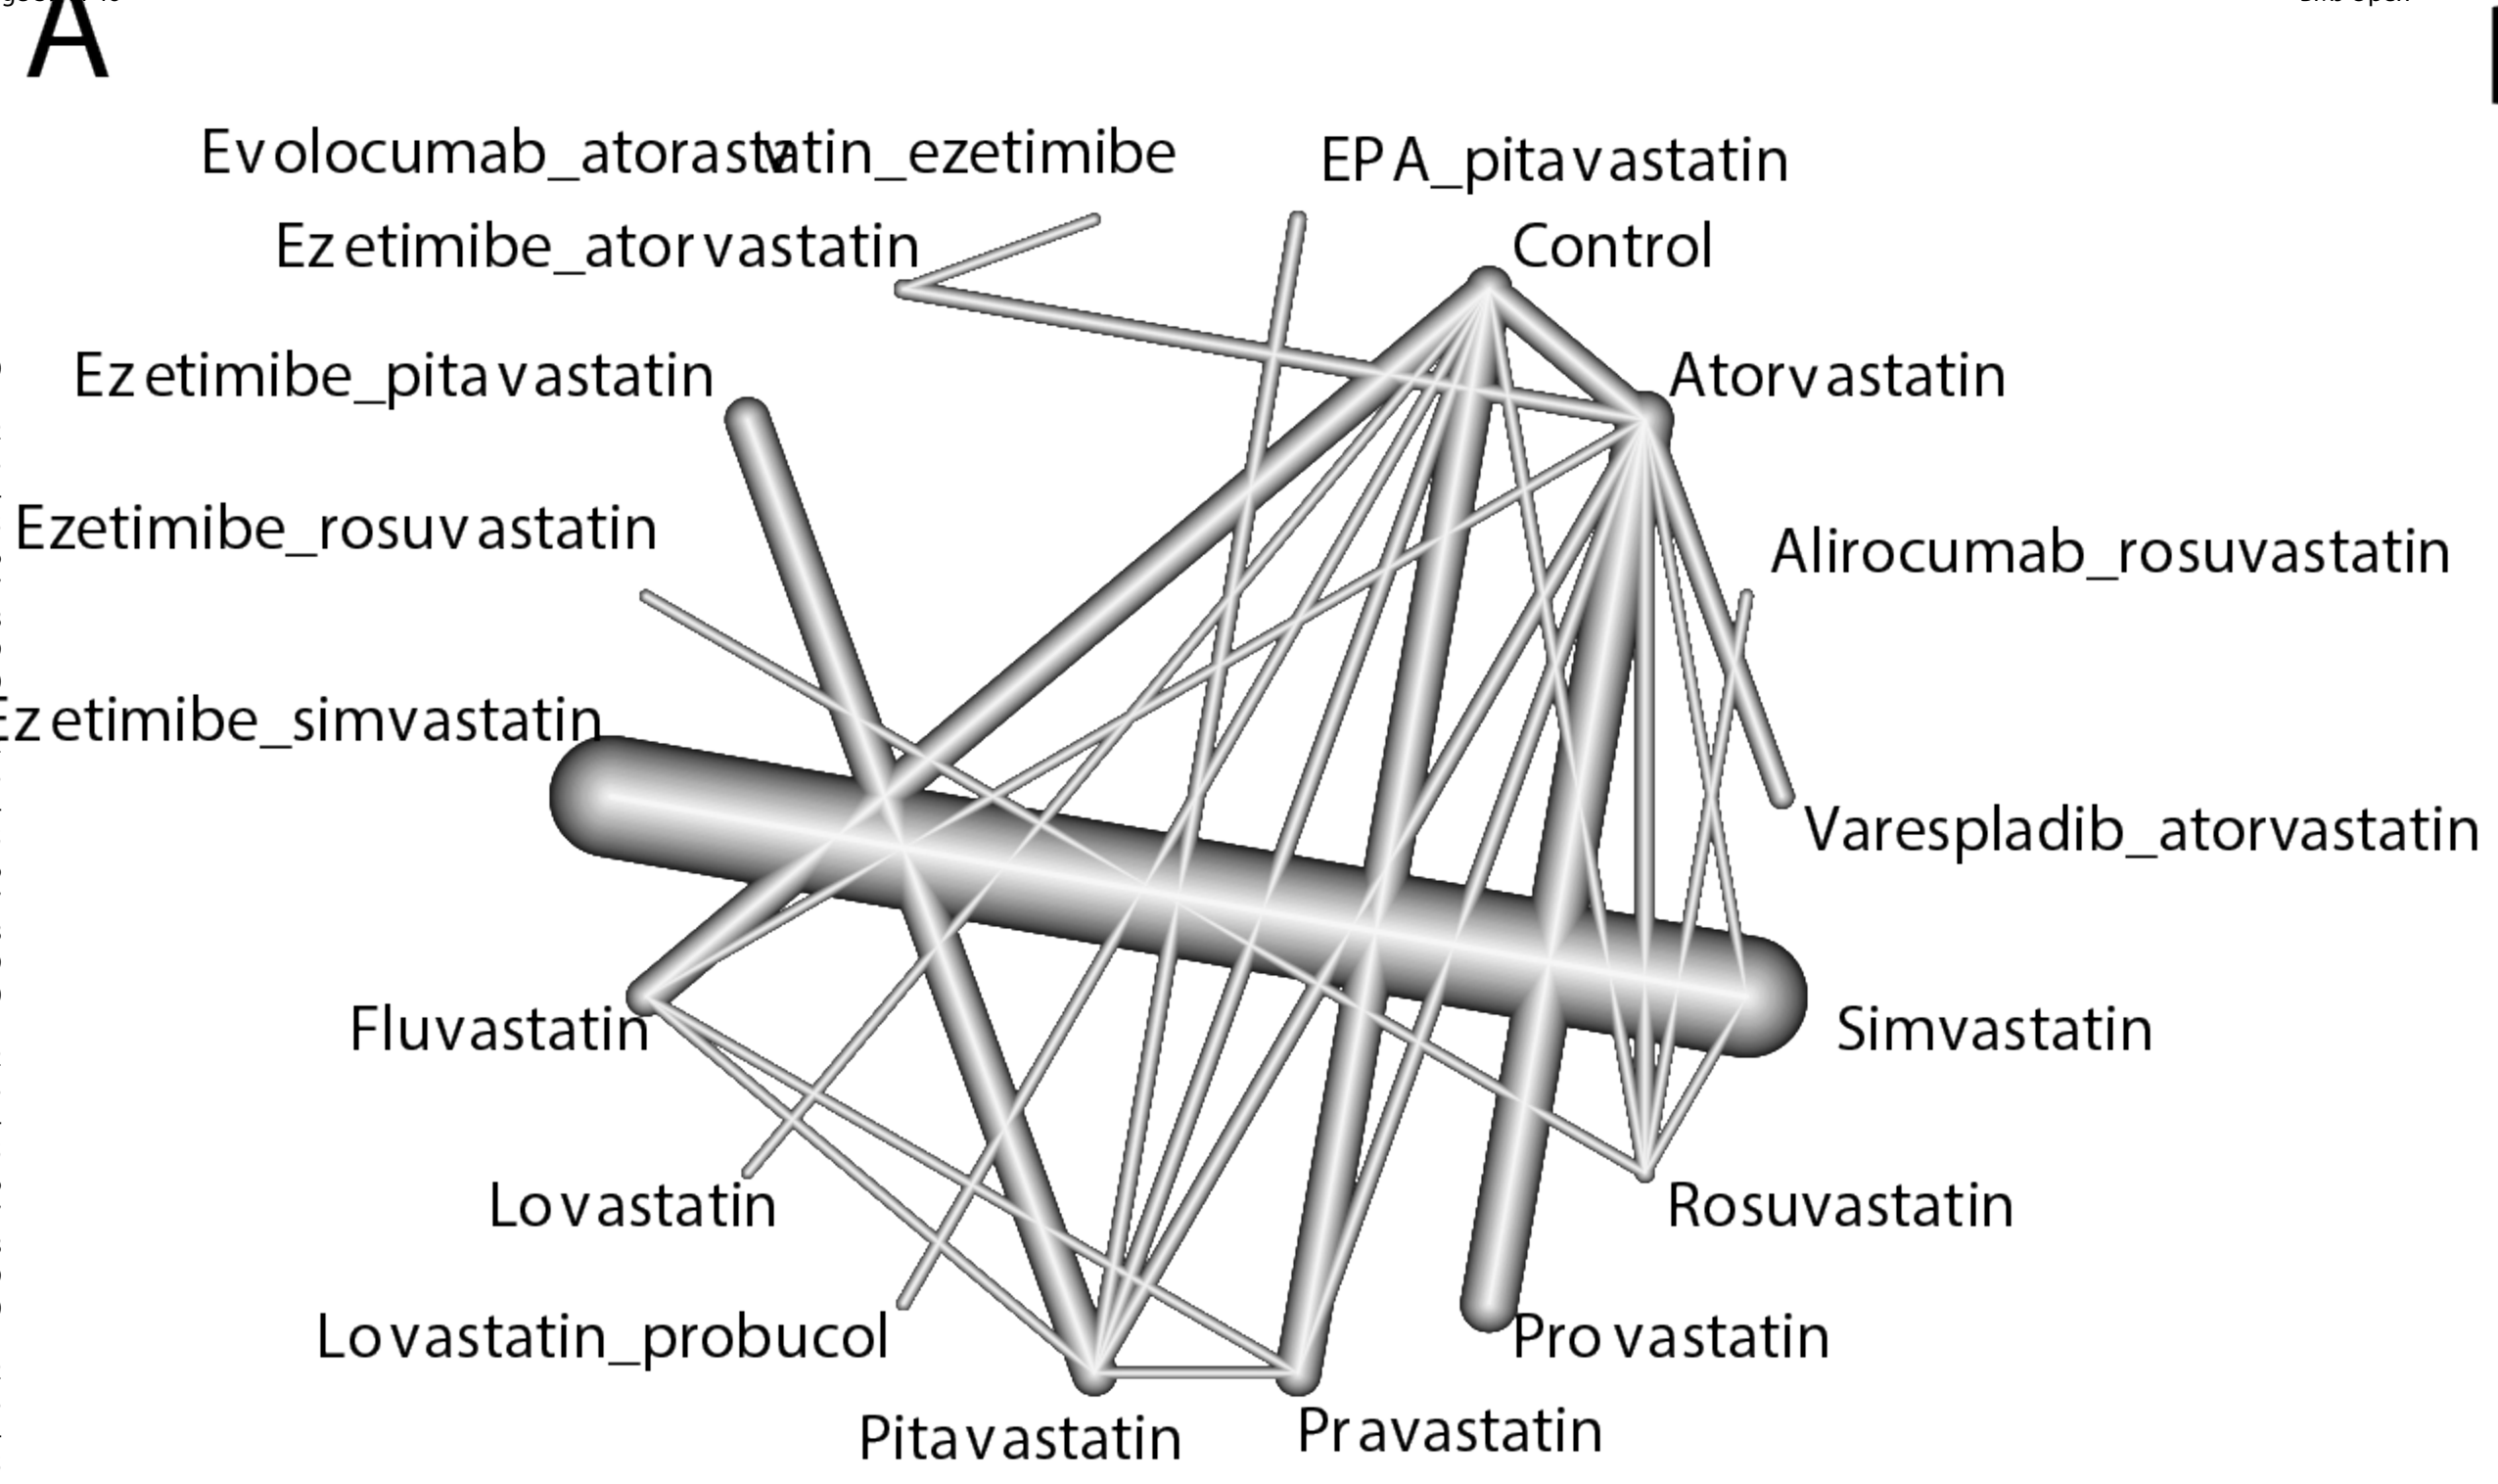

For peer review only

A



B



C



D



E

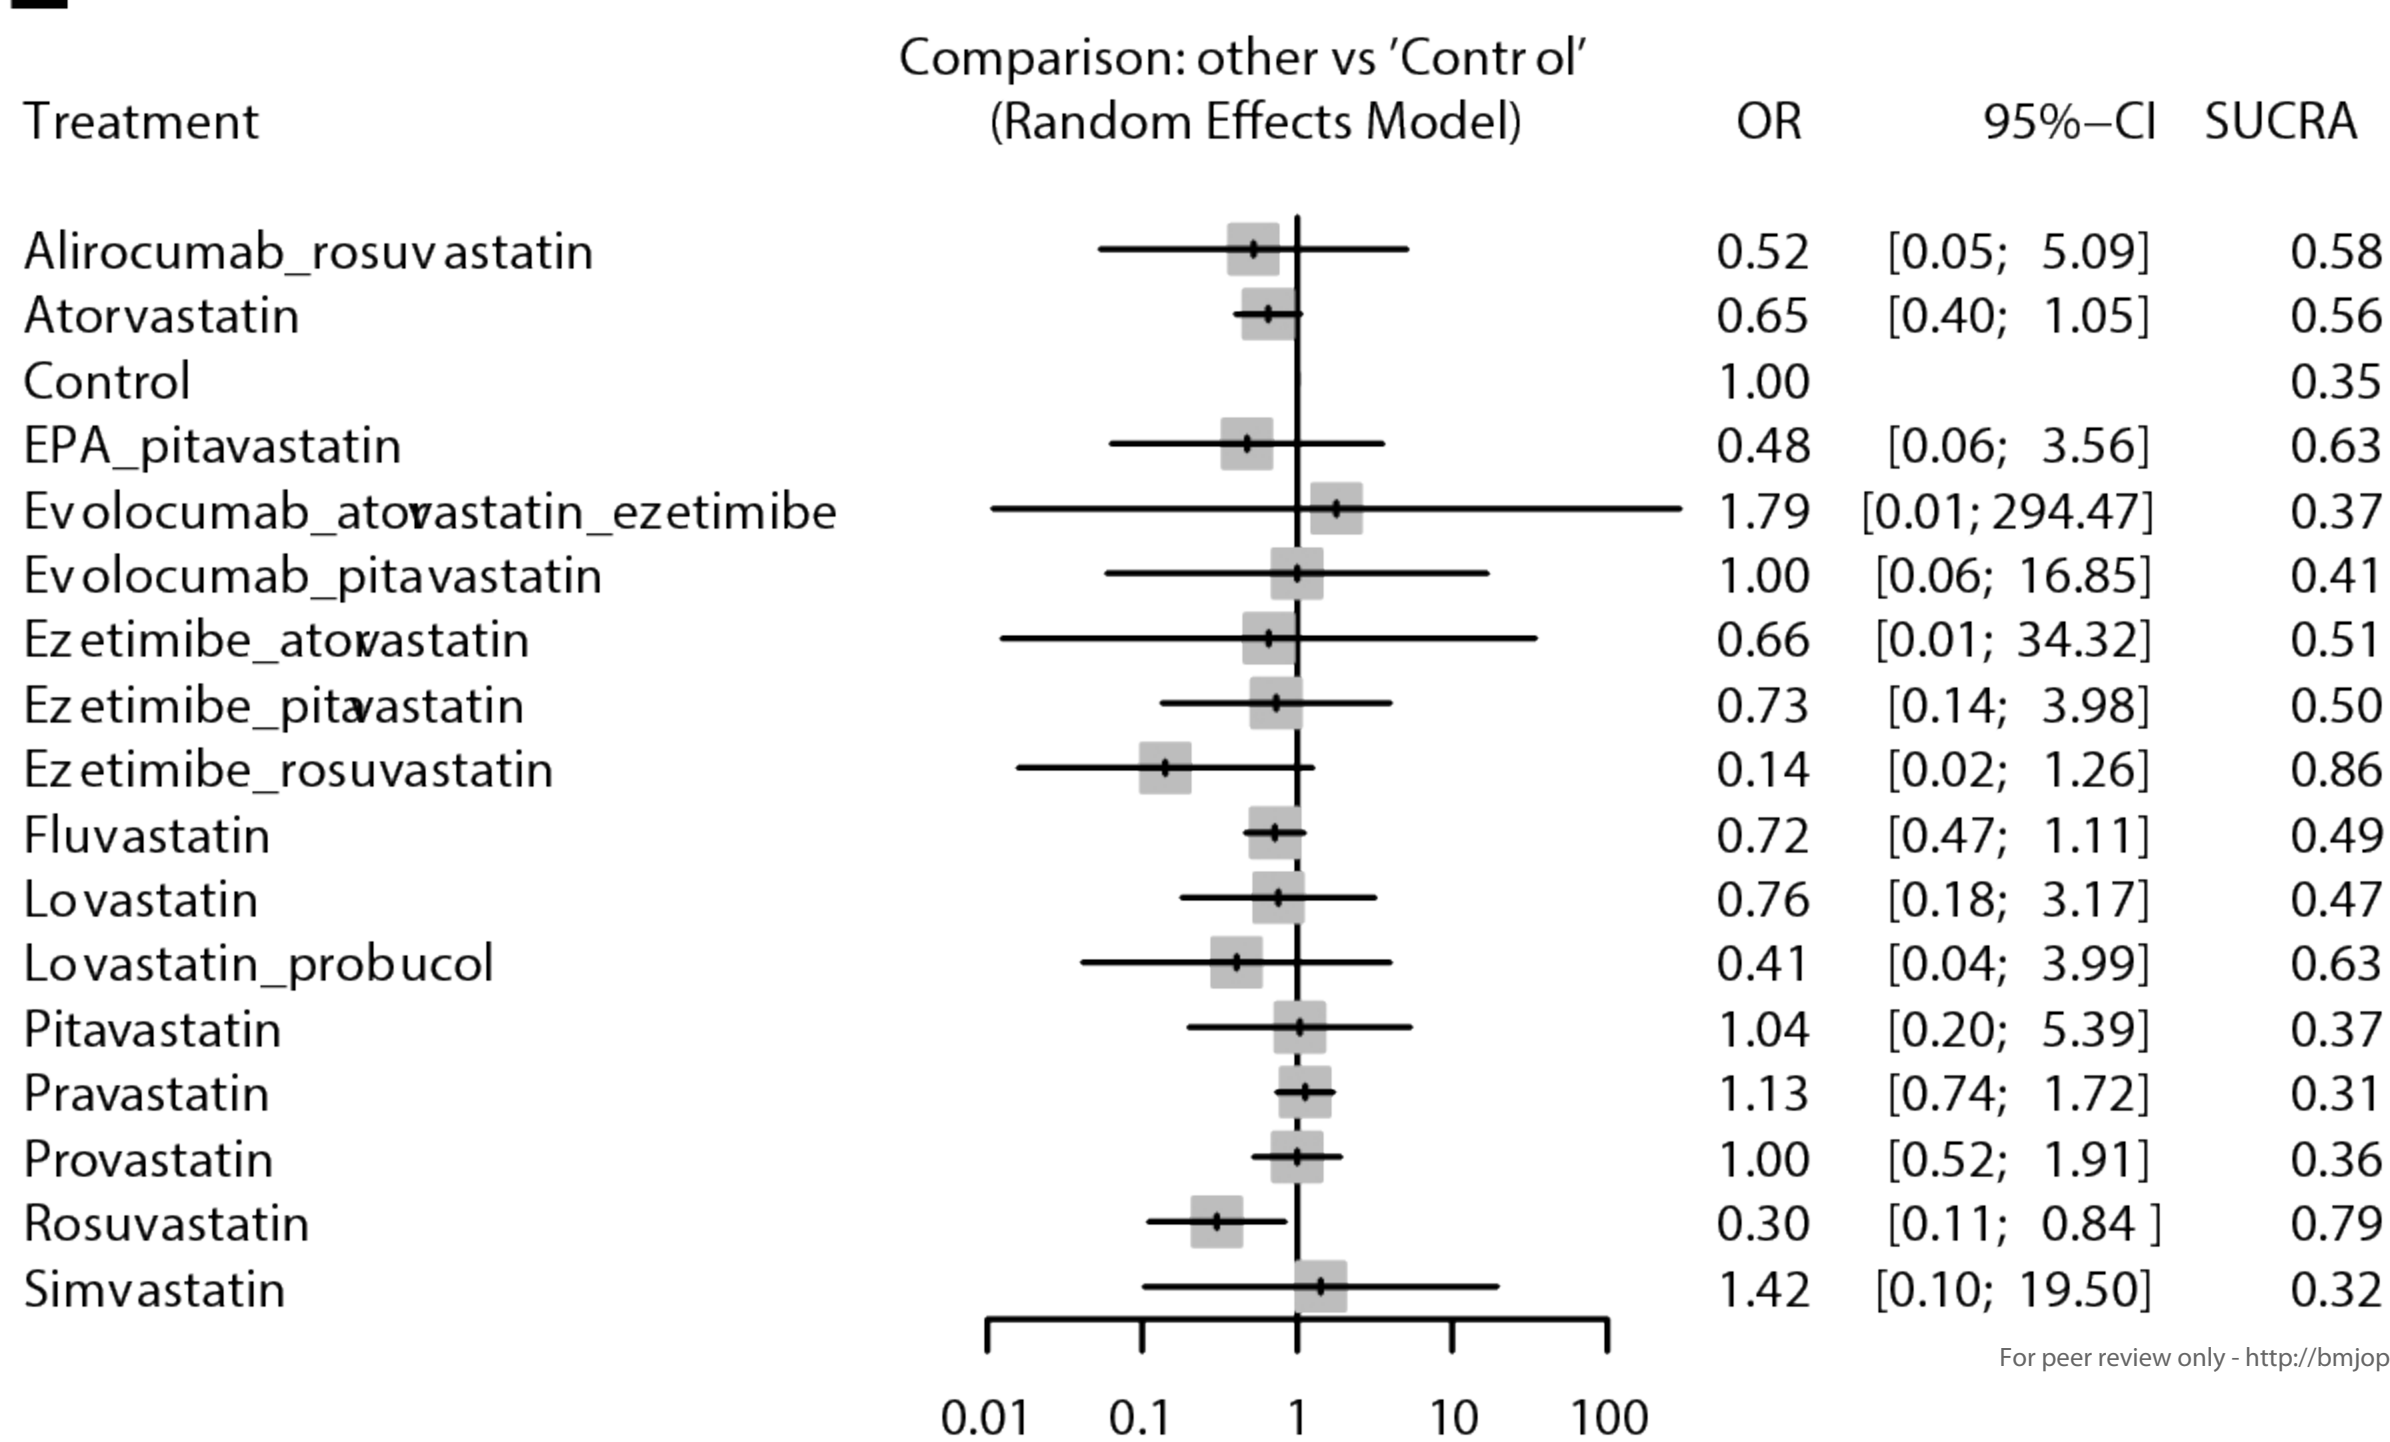

F

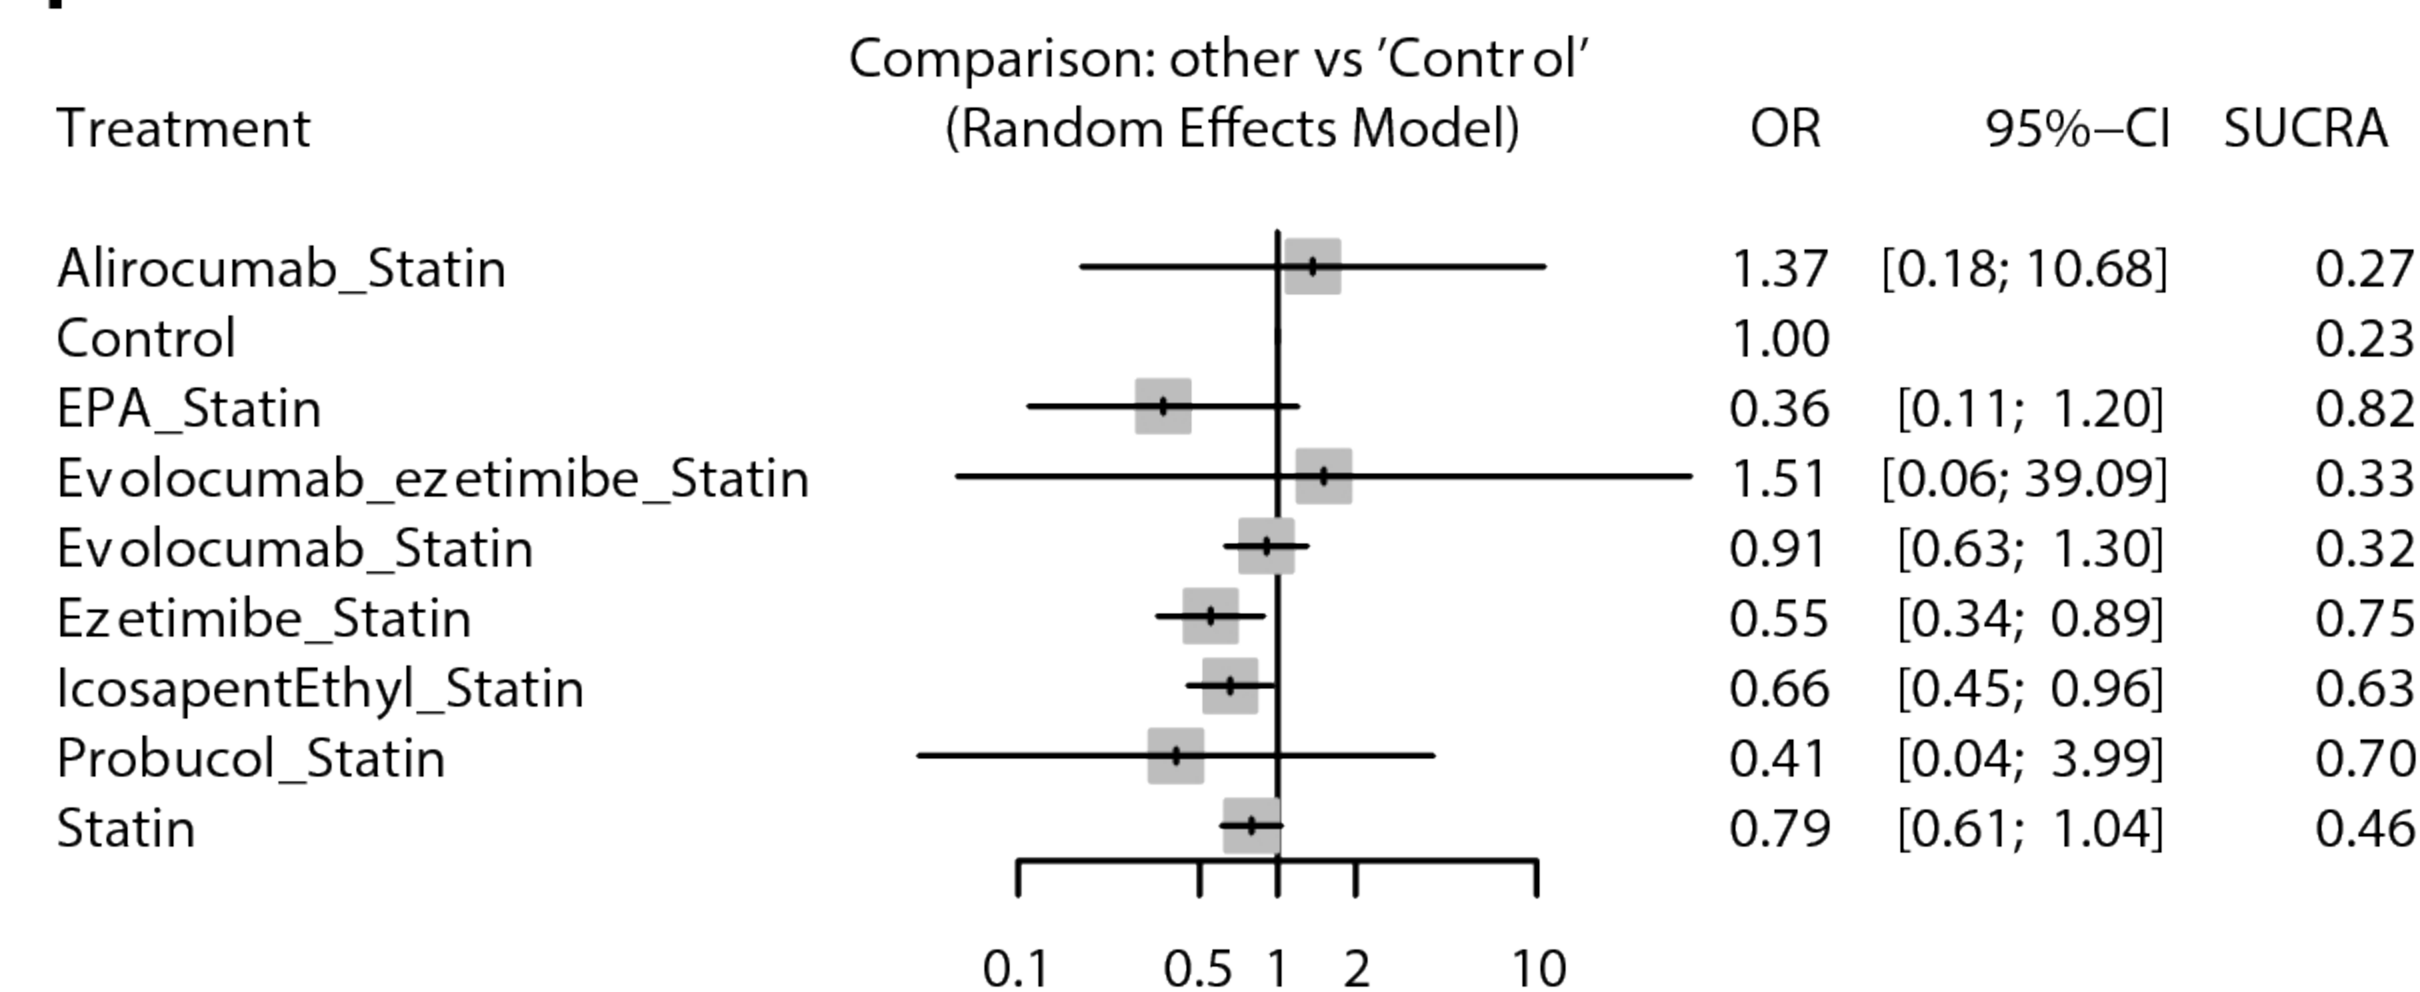

1  
2  
3  
4  
5  
6  
7  
8  
9  
10  
11  
12  
13  
14  
15  
16  
17  
18  
19  
20  
21  
22  
23  
24  
25  
26  
27  
28  
29  
30  
31  
32  
33  
34  
35  
36  
37  
38  
39  
40  
41  
42  
43  
44  
45  
46  
47  
48  
49  
50  
51  
52  
53  
54  
55  
56  
57  
58  
59  
60

C

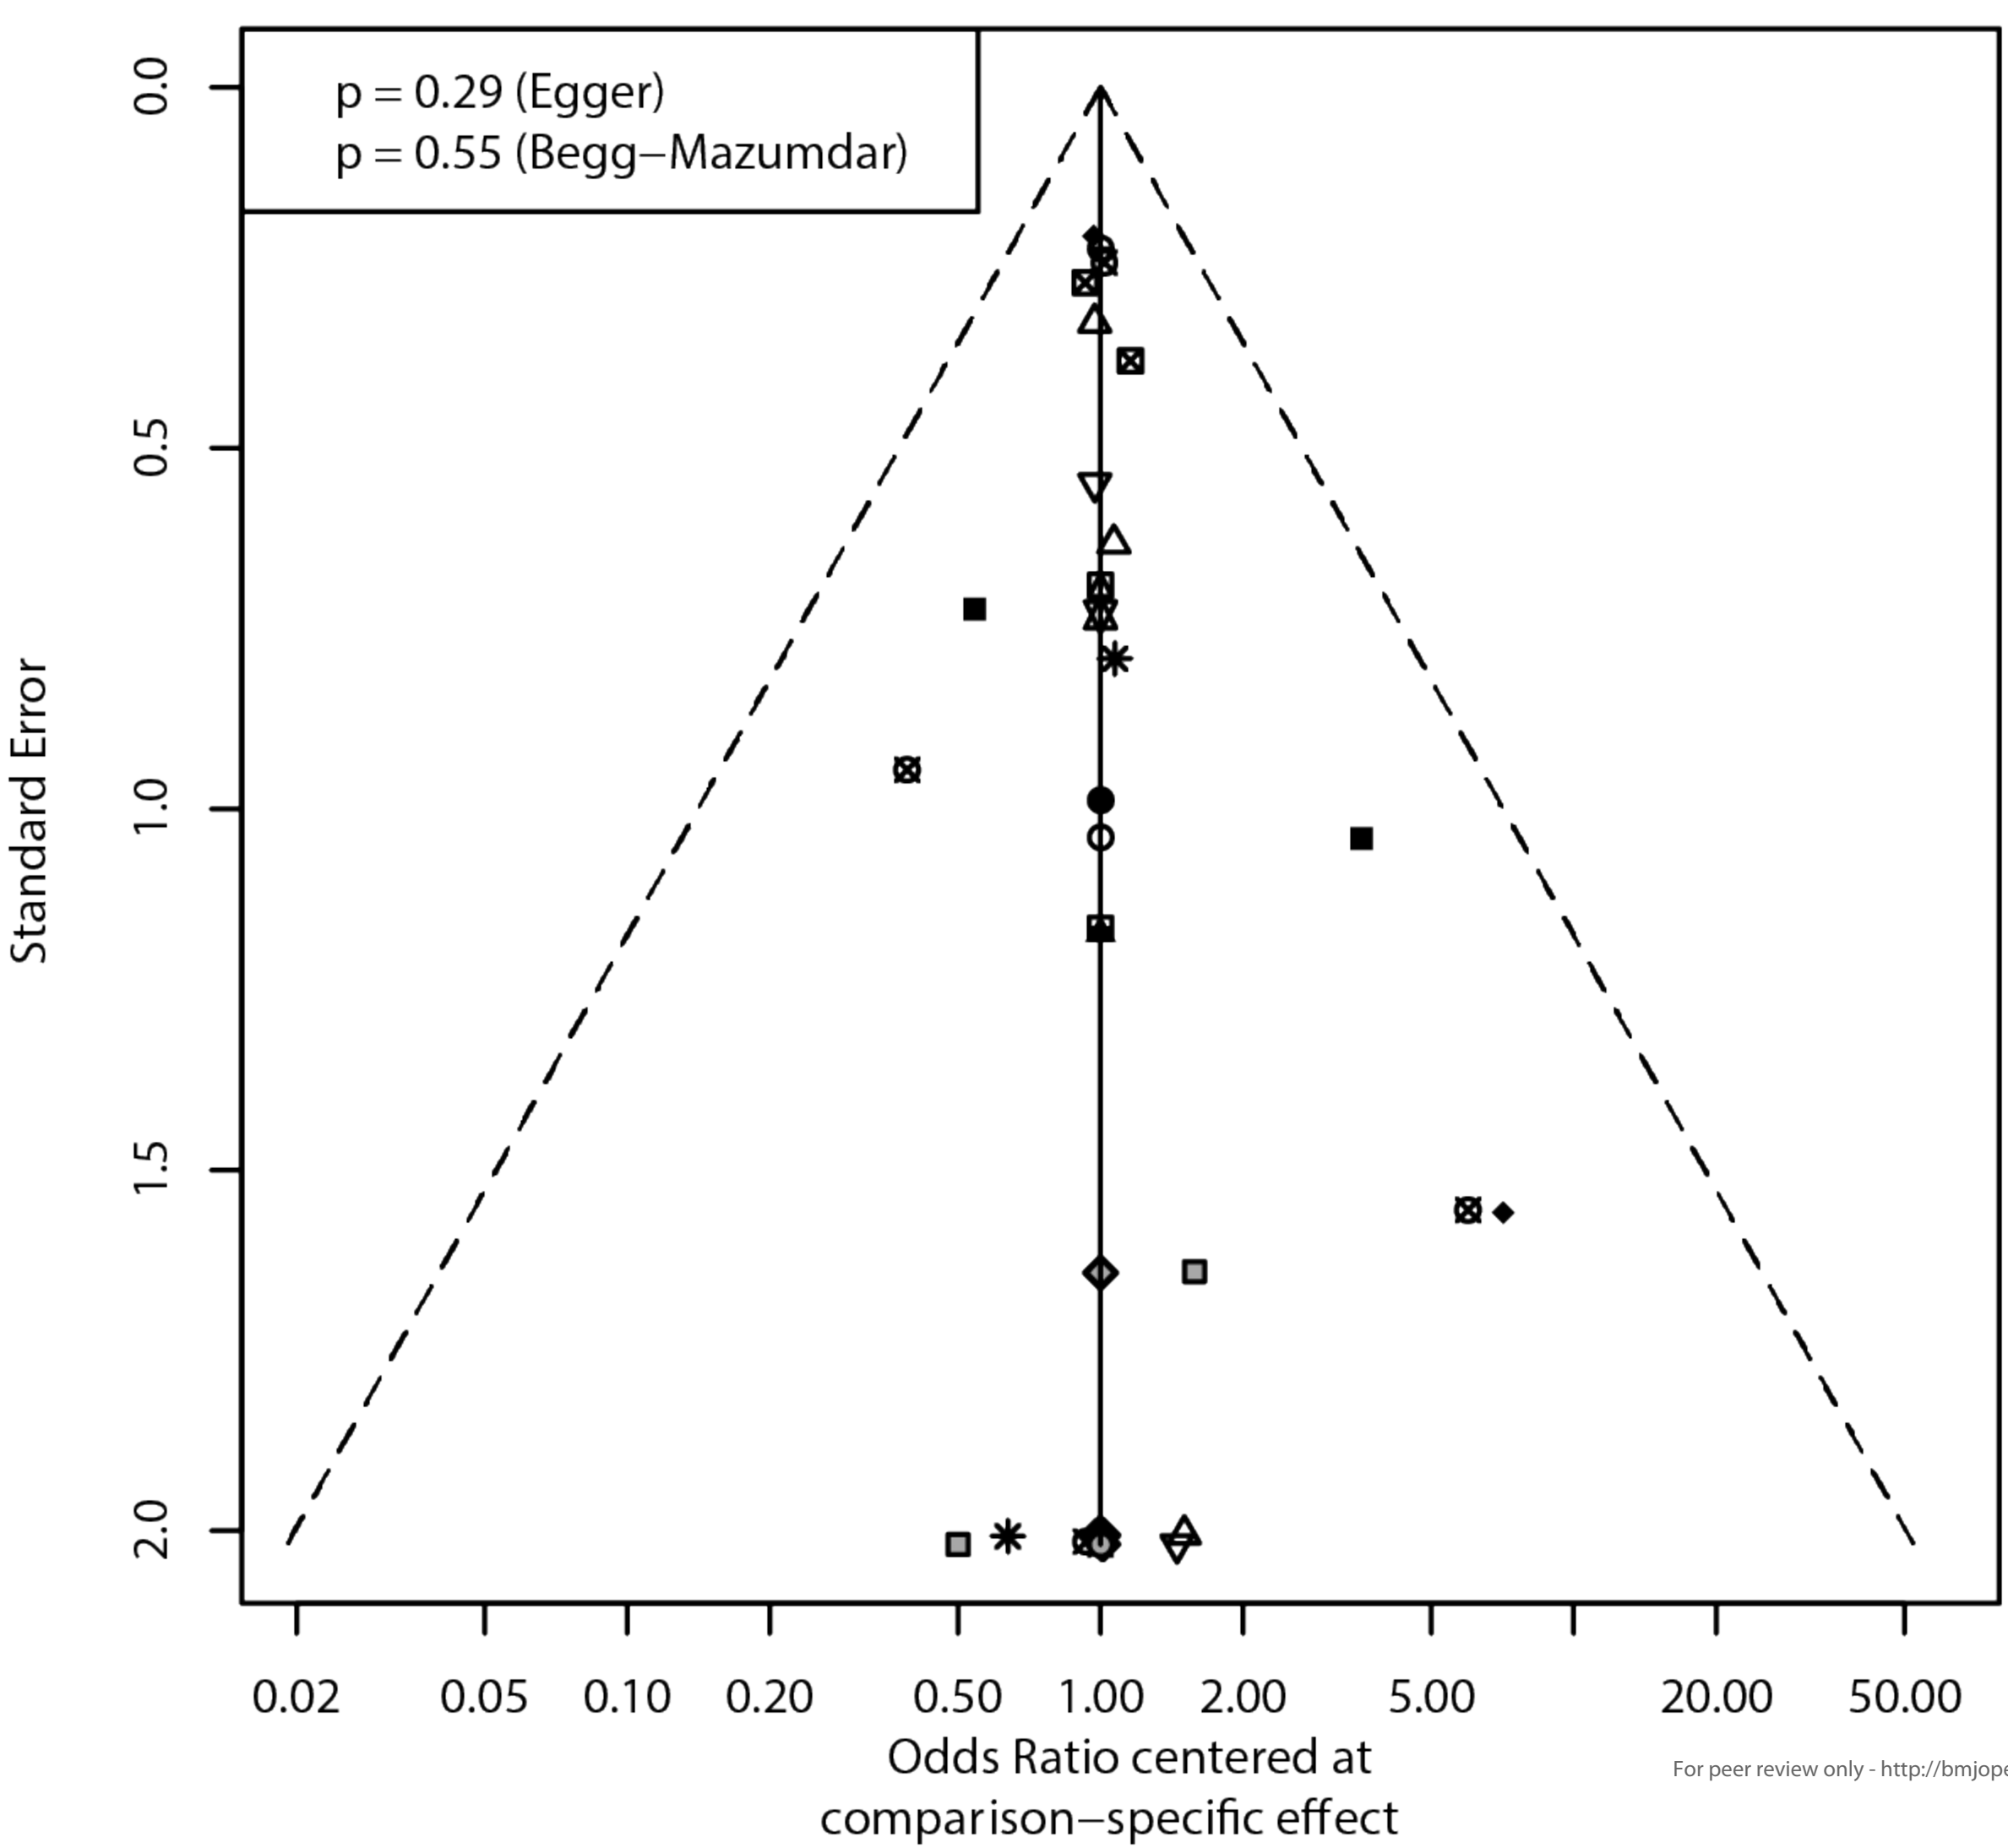

B

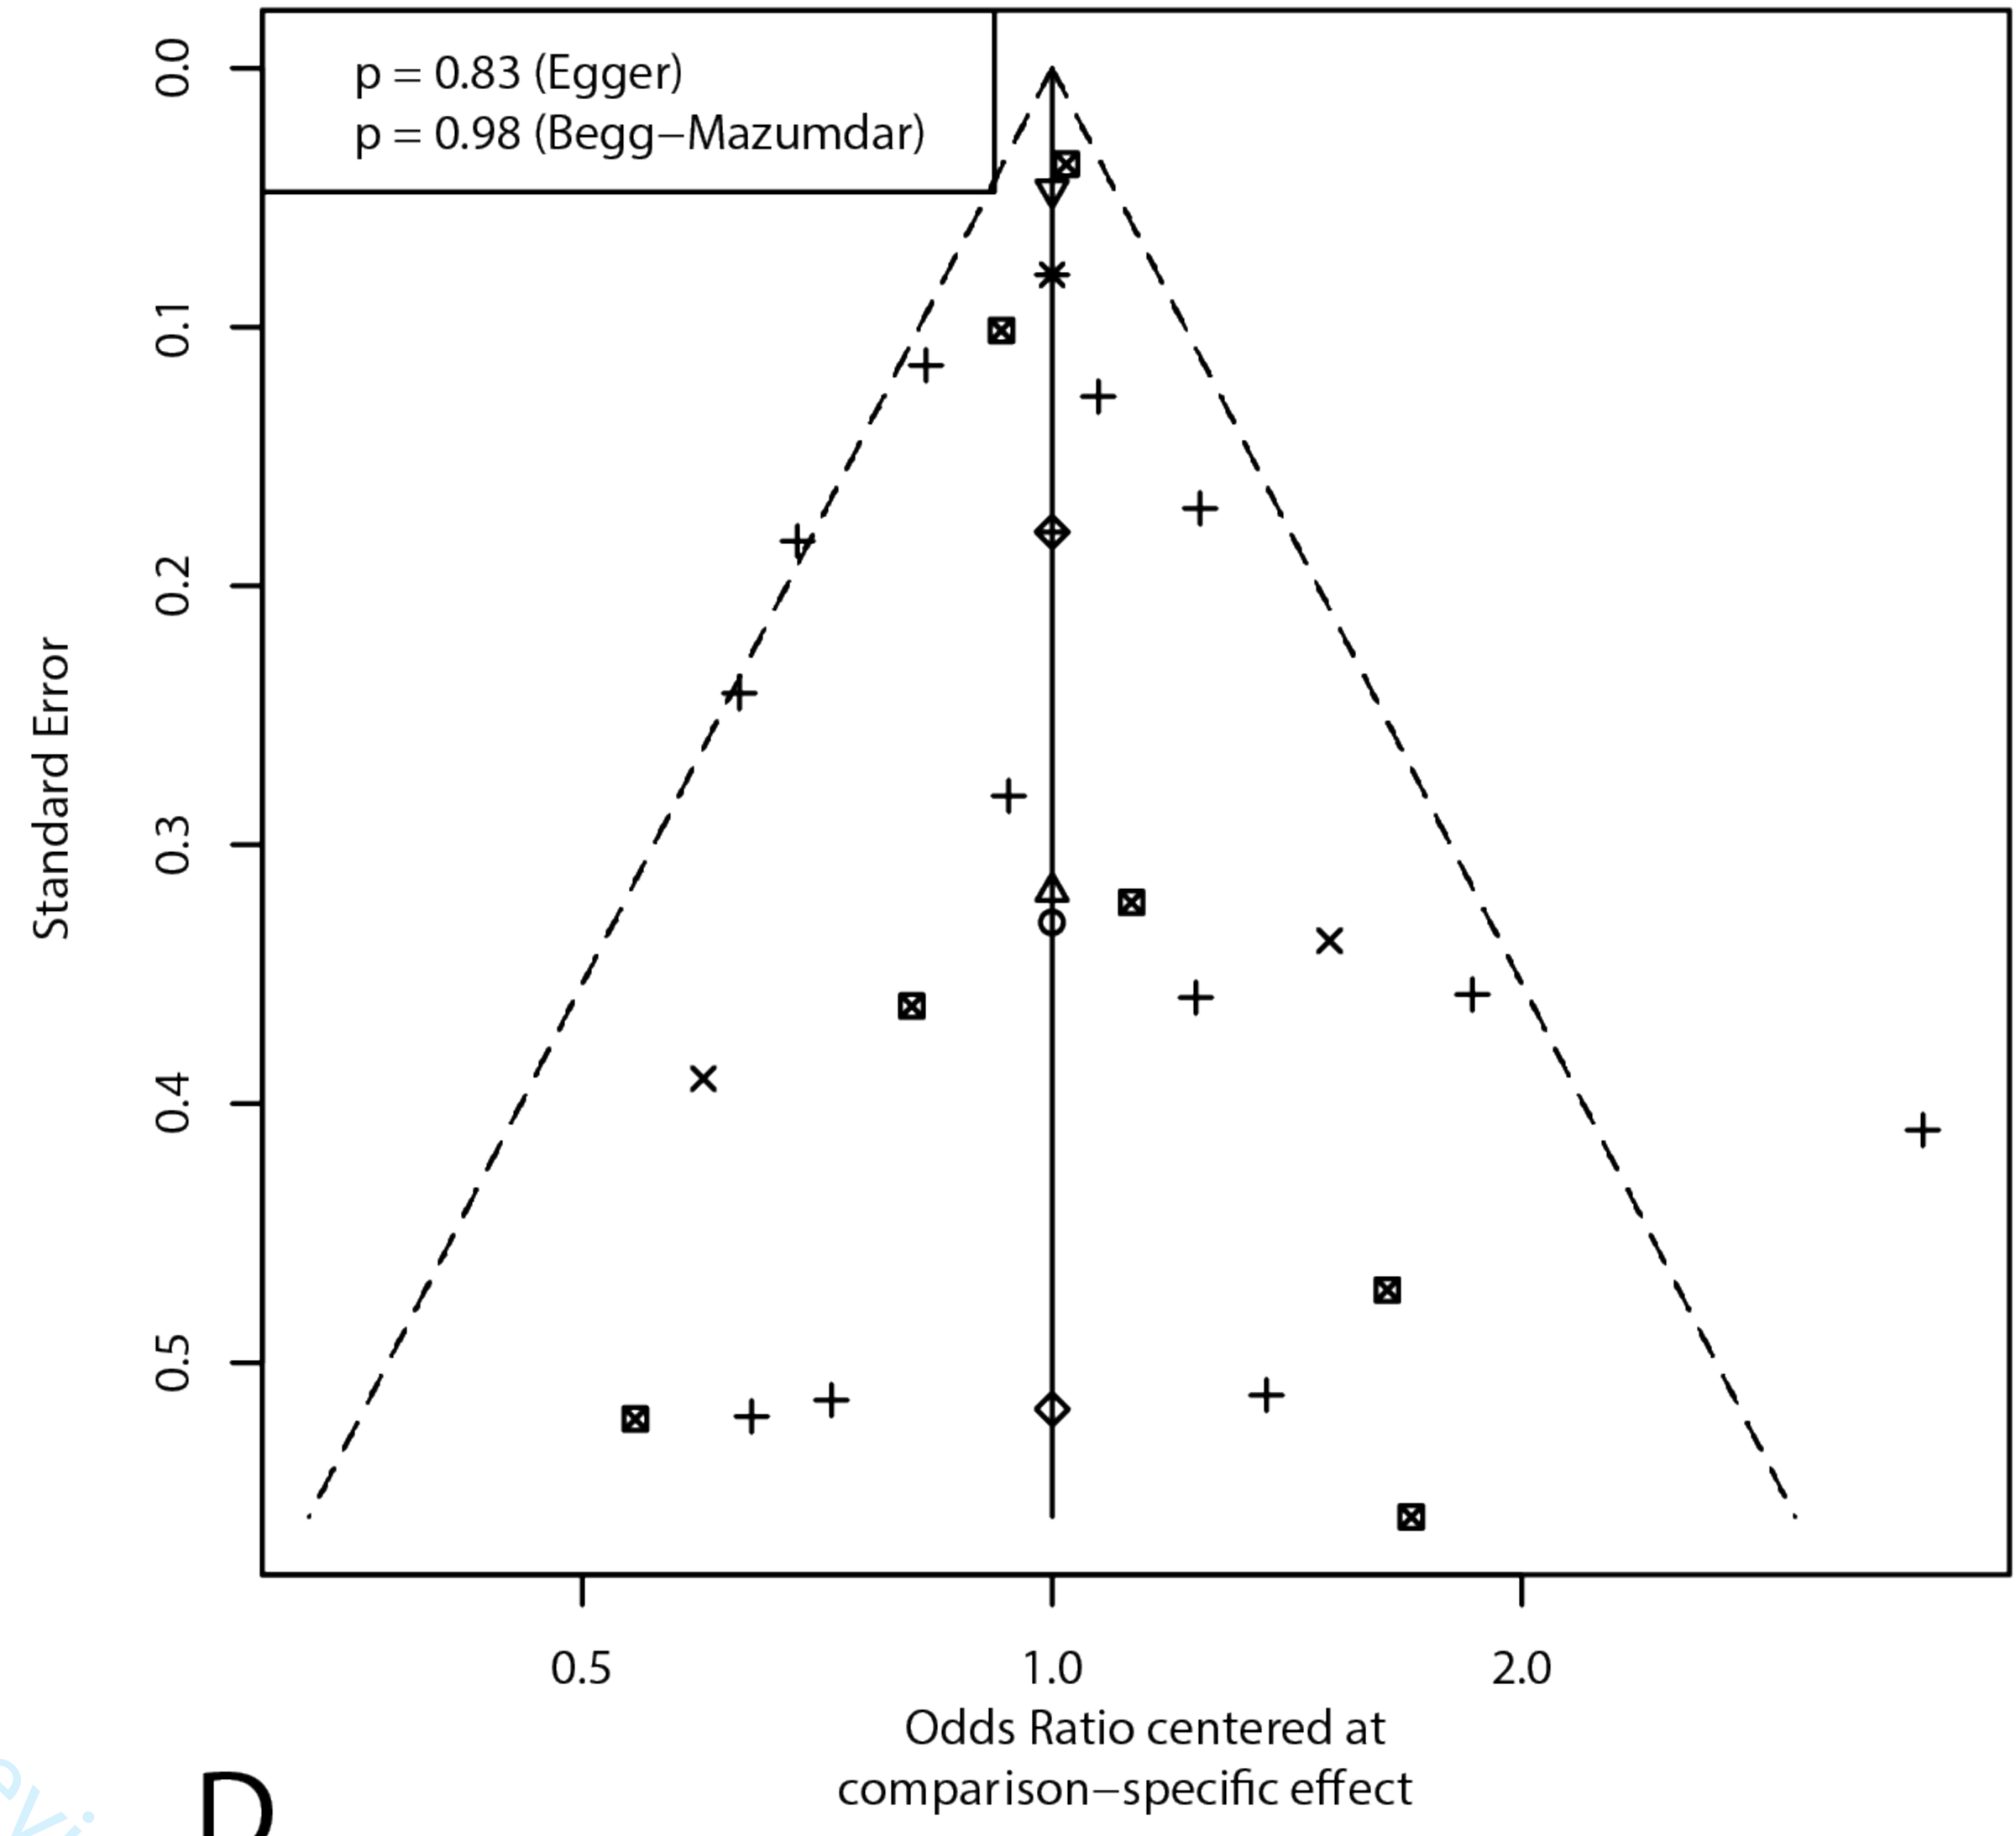

D

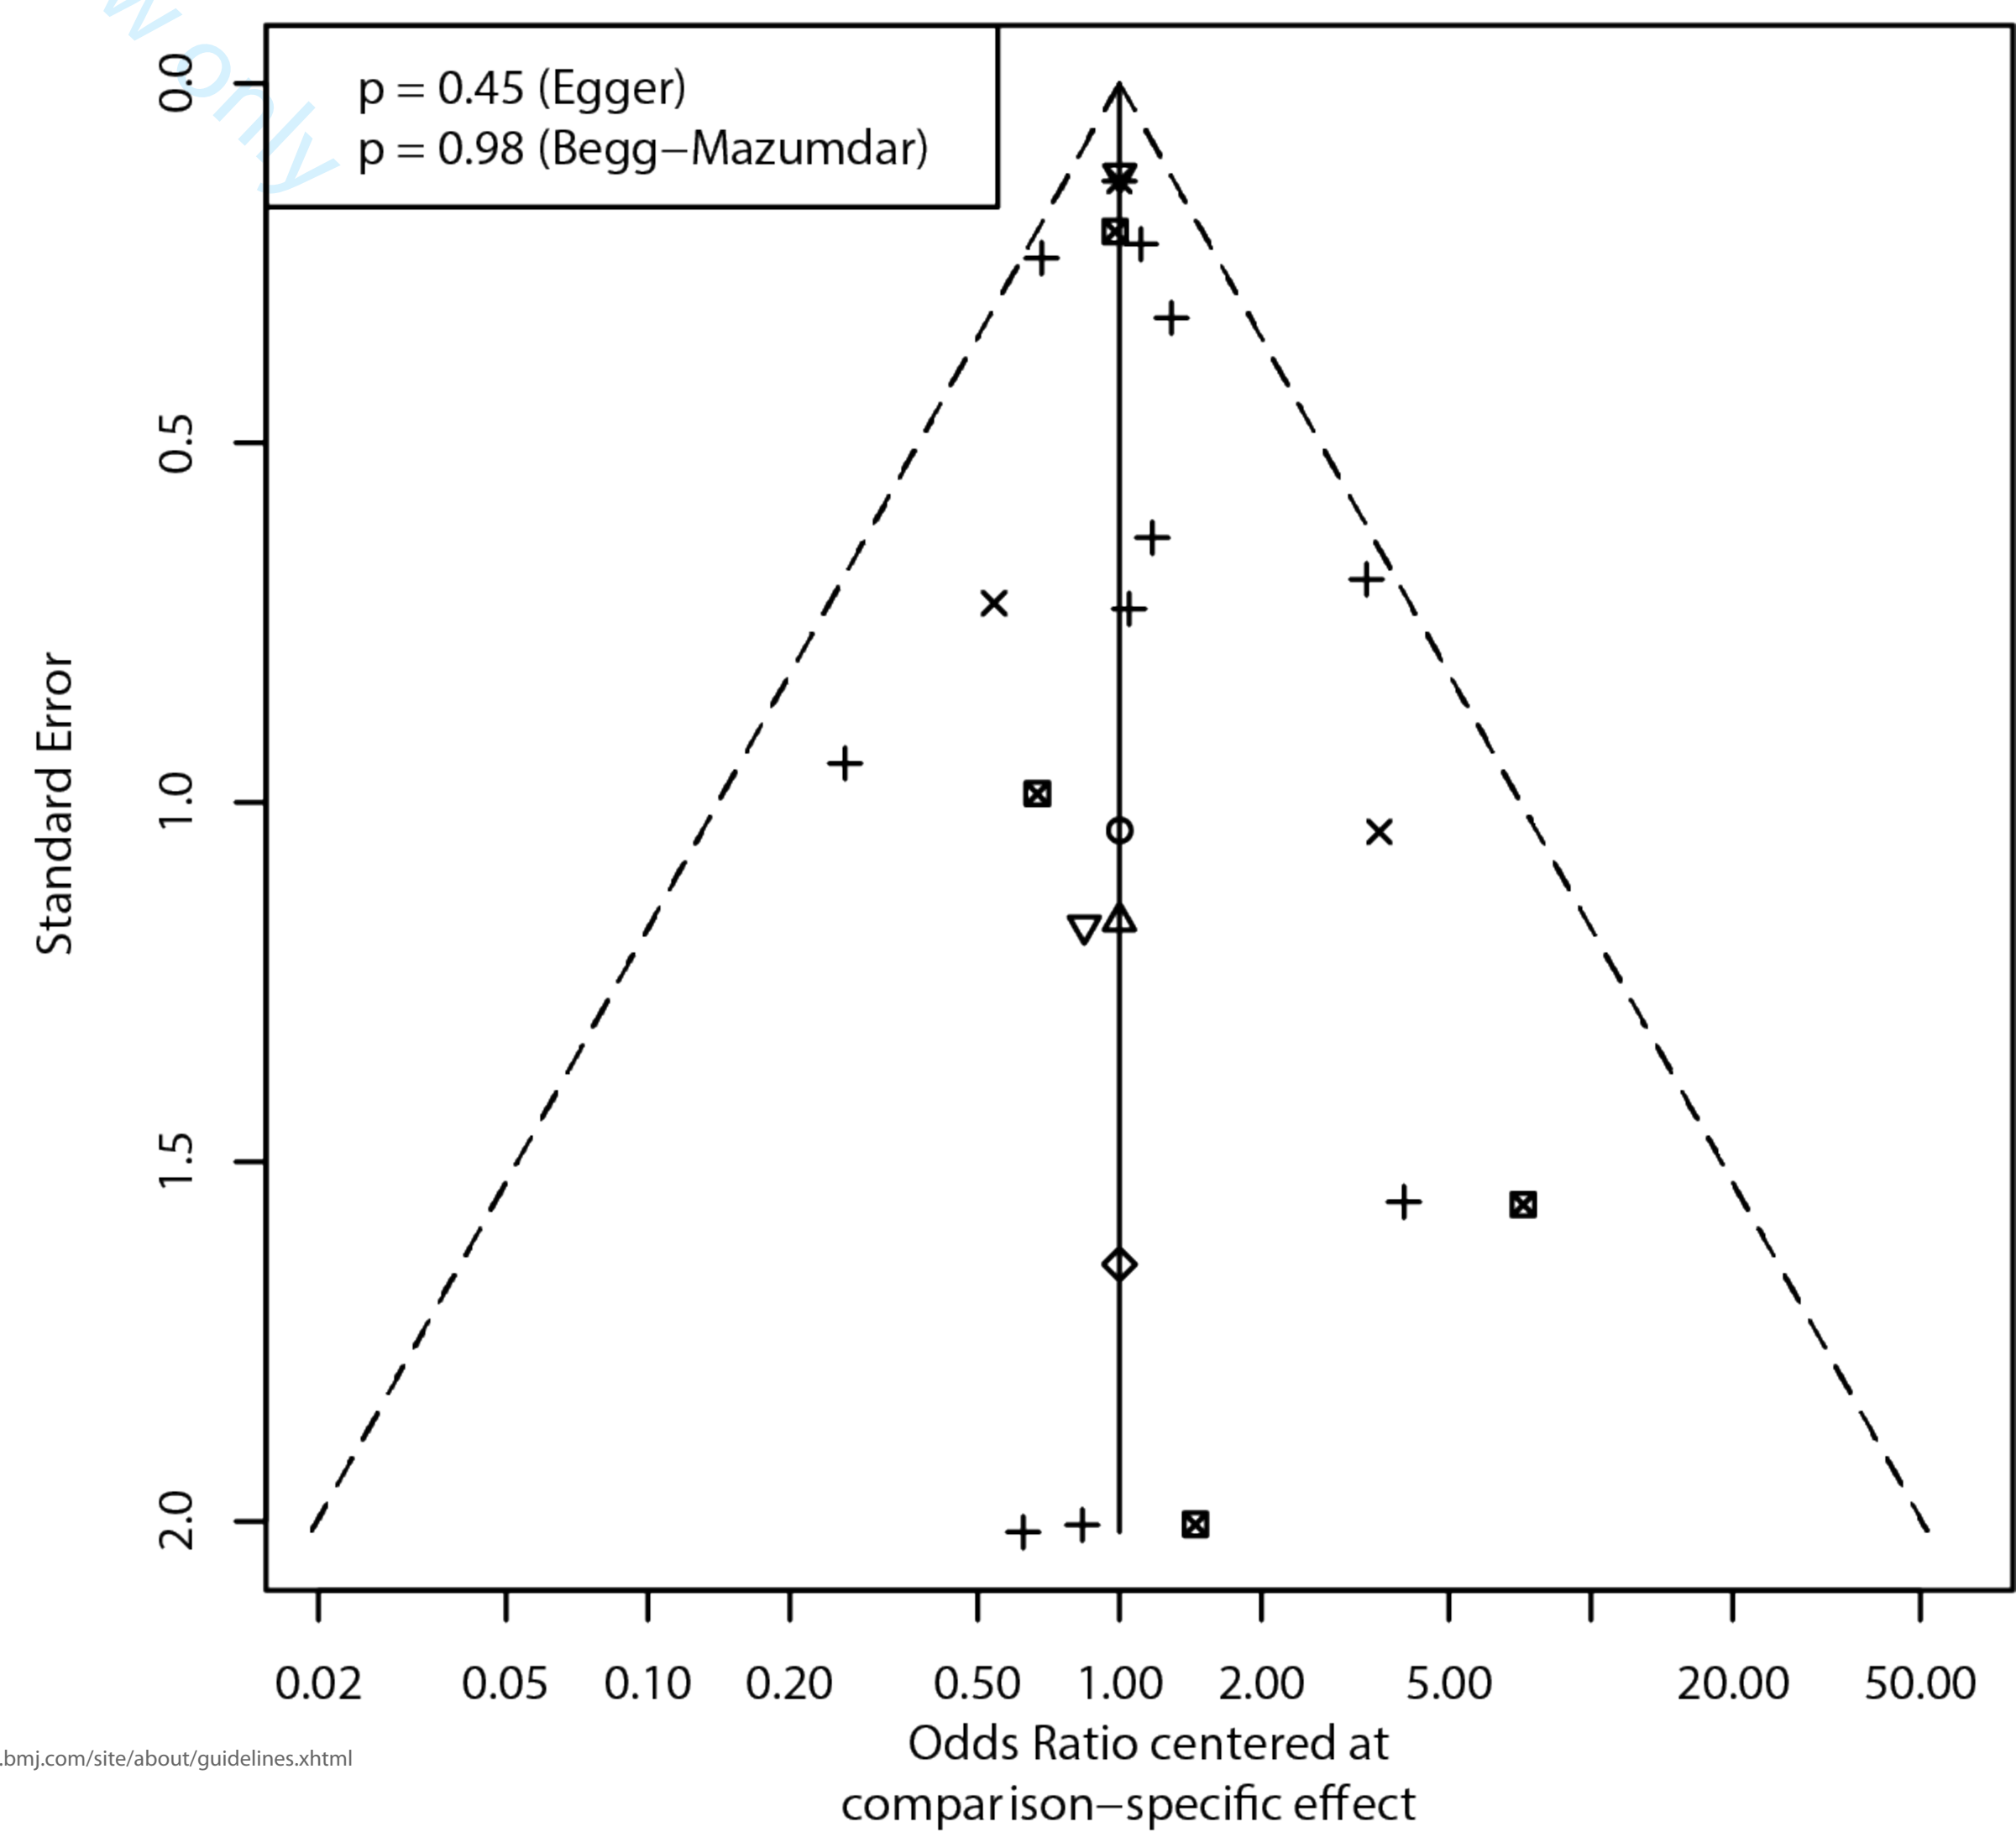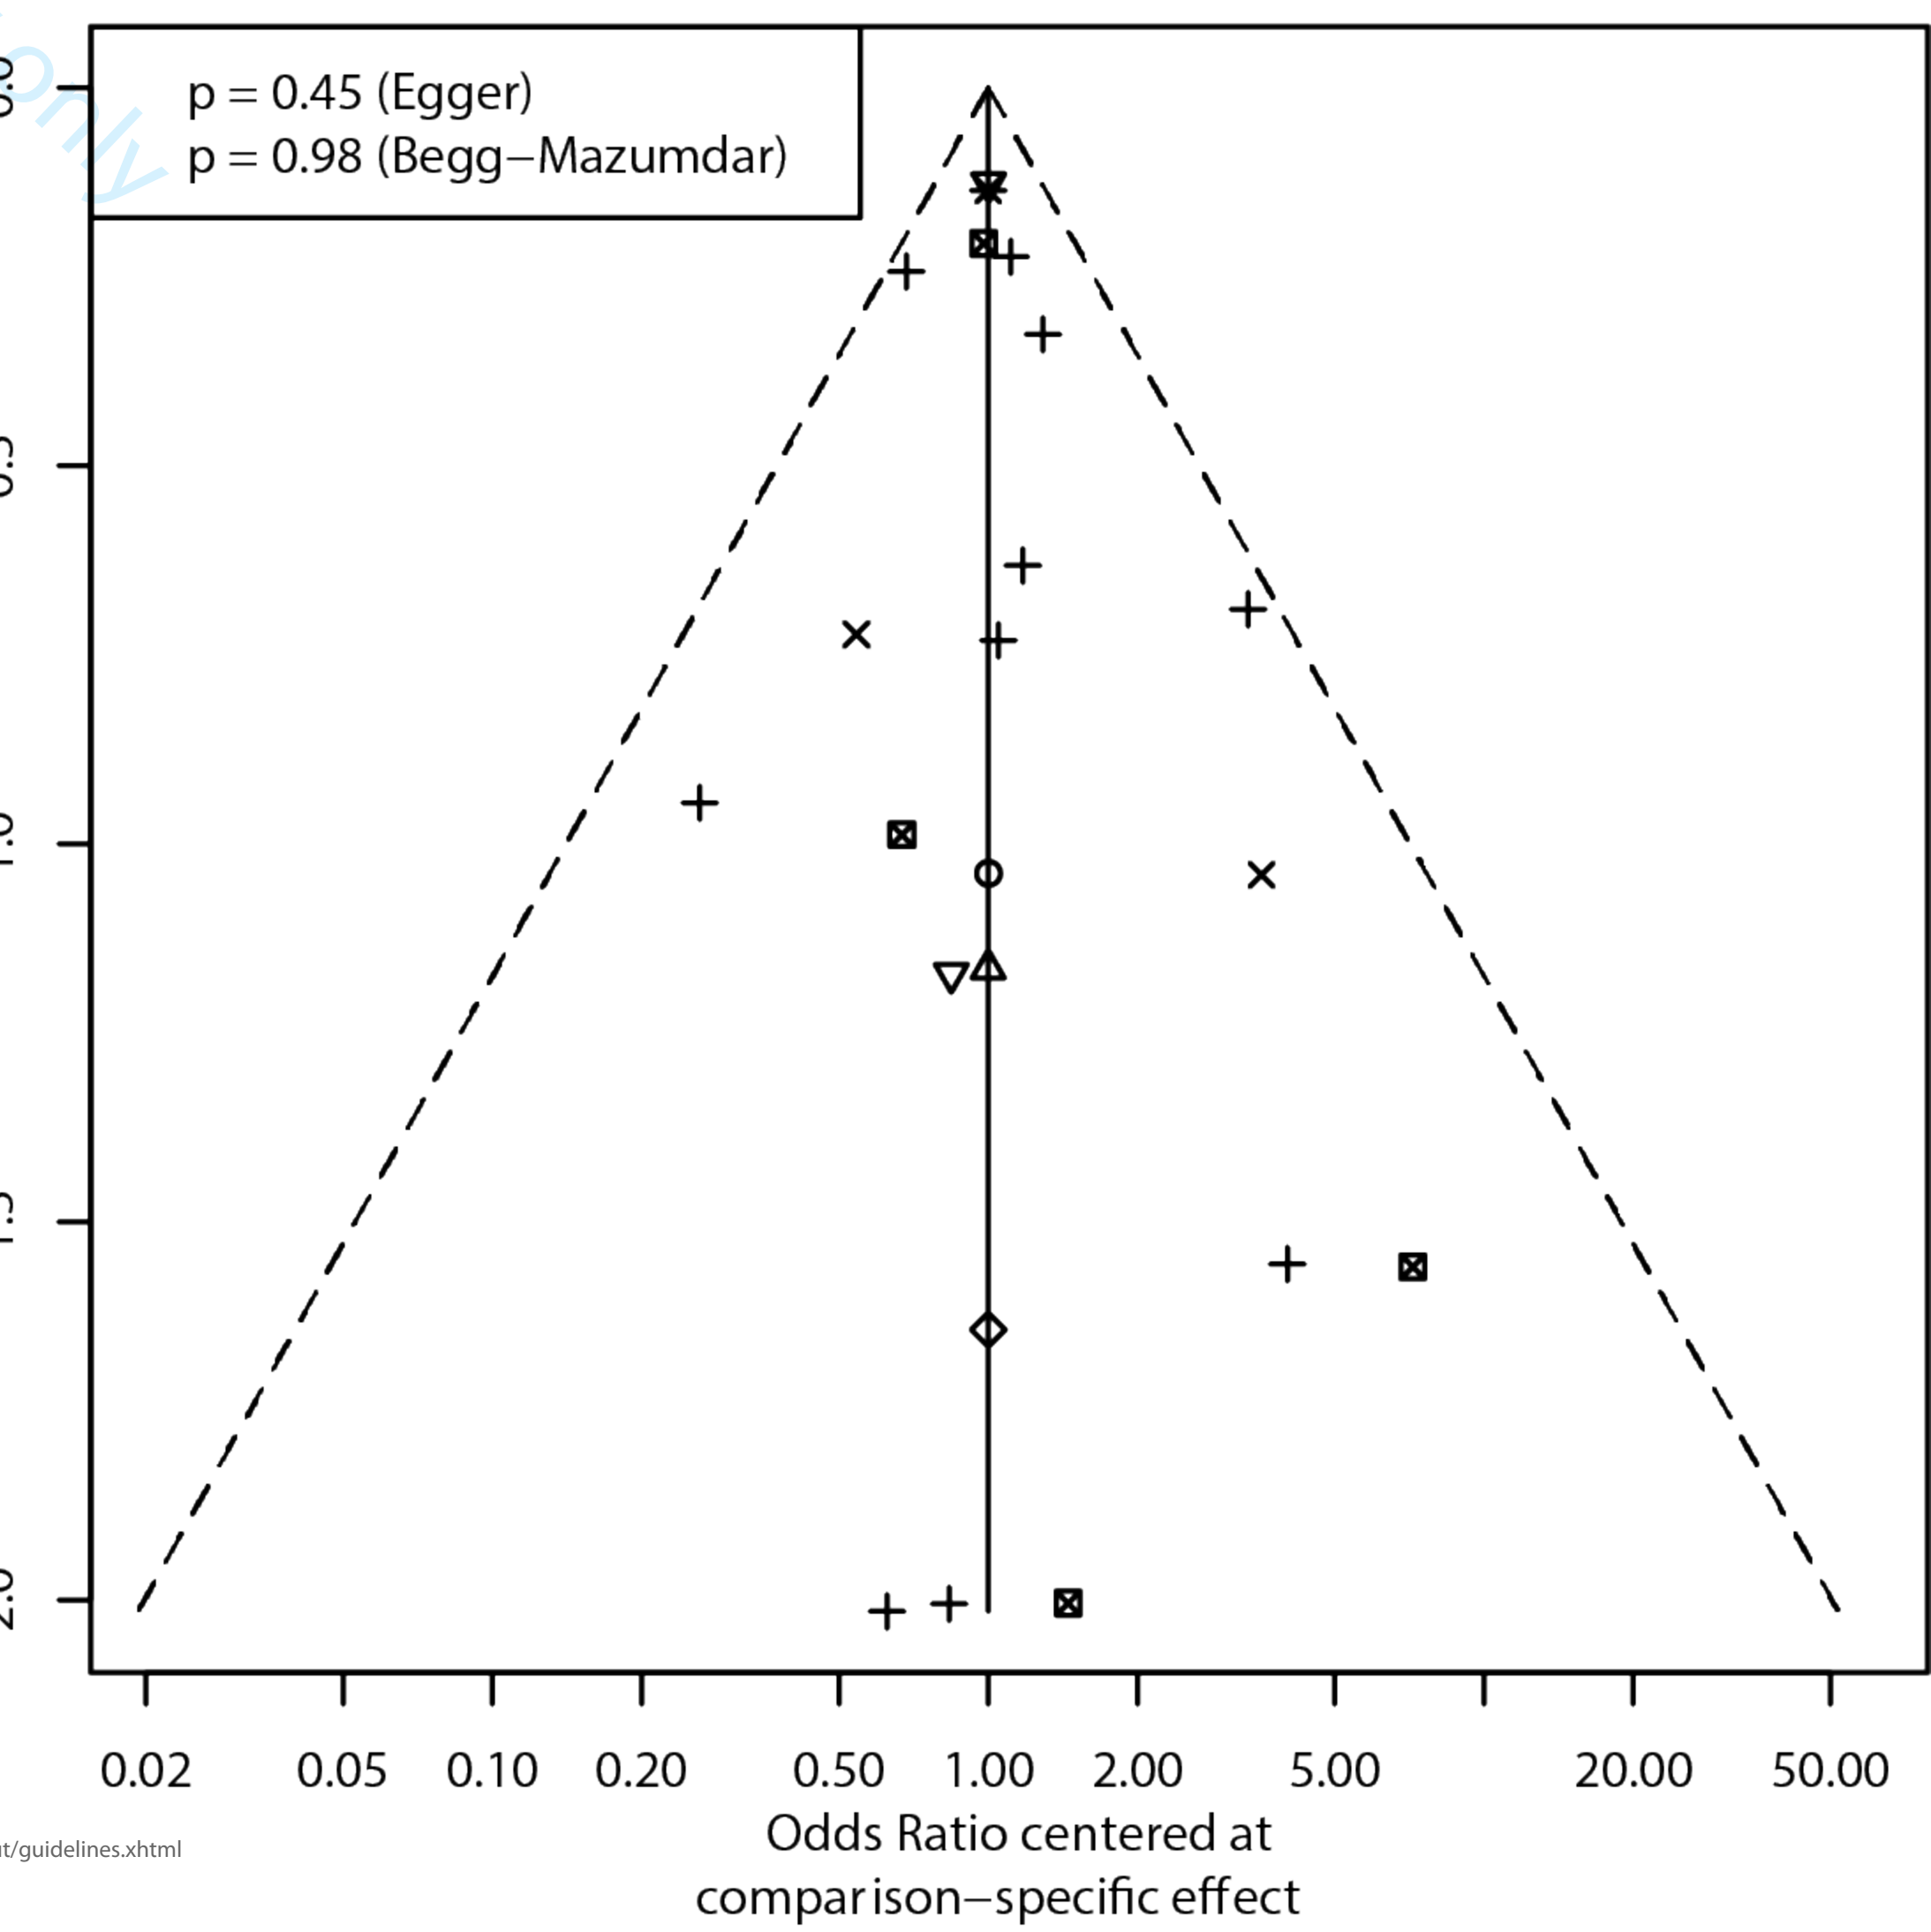

For peer review only - <http://bmjopen.bmj.com/site/about/guidelines.xhtml>

### The full search strategy for all databases.

a. The search query used in PubMed database without language or other additional limits.

| Search number | Query                                                                                                                                                                                                                                                                                                                                          | Results   |
|---------------|------------------------------------------------------------------------------------------------------------------------------------------------------------------------------------------------------------------------------------------------------------------------------------------------------------------------------------------------|-----------|
| 4             | ((#1) AND (#2)) AND (#3)                                                                                                                                                                                                                                                                                                                       | 553       |
| 3             | Random* or randomized or randomised                                                                                                                                                                                                                                                                                                            | 1,591,835 |
| 2             | "percutaneous coronary intervention" OR "Coronary angioplasty"                                                                                                                                                                                                                                                                                 | 61,003    |
| 1             | Statin or Simvastatin or Rosuvastatin or Atorvastatin or Fluvastatin or Lovastatin or Pravastatin or Mevastatin or ezetimibe or "Icosapent Ethyl" or "Bempedoic acid" or fibrate or evolocumab or Alirocumab or evinacumab or Volanesorsen or Vupanorsen or Pelacarsen or Olezarsen or Pelacarsen or Inclisiran or olpasiran or Lipid-lowering | 88,902    |

b. The search strategy used in EmBase database without language or other additional limits.

| No. | Query                                                                                                                                                                                                                                                                                                                                                                                                                                                                                                                                                                                                                                                                                                                                                                                                                                                                                                                                                                                                      | Results |
|-----|------------------------------------------------------------------------------------------------------------------------------------------------------------------------------------------------------------------------------------------------------------------------------------------------------------------------------------------------------------------------------------------------------------------------------------------------------------------------------------------------------------------------------------------------------------------------------------------------------------------------------------------------------------------------------------------------------------------------------------------------------------------------------------------------------------------------------------------------------------------------------------------------------------------------------------------------------------------------------------------------------------|---------|
| #4  | #1 AND #2 AND #3                                                                                                                                                                                                                                                                                                                                                                                                                                                                                                                                                                                                                                                                                                                                                                                                                                                                                                                                                                                           | 1308    |
| #3  | random* OR randomized                                                                                                                                                                                                                                                                                                                                                                                                                                                                                                                                                                                                                                                                                                                                                                                                                                                                                                                                                                                      | 2080906 |
| #2  | 'percutaneous coronary intervention' OR 'coronary angioplasty'                                                                                                                                                                                                                                                                                                                                                                                                                                                                                                                                                                                                                                                                                                                                                                                                                                                                                                                                             | 131280  |
| #1  | 'statin'/exp OR statin OR 'simvastatin'/exp OR simvastatin OR 'rosuvastatin'/exp OR rosuvastatin OR 'atorvastatin'/exp OR atorvastatin OR 'fluvastatin'/exp OR fluvastatin OR 'lovastatin'/exp OR lovastatin OR 'pravastatin'/exp OR pravastatin OR 'pitavastatin'/exp OR pitavastatin OR 'mevastatin'/exp OR mevastatin OR 'ezetimibe'/exp OR ezetimibe OR 'icosapentaenoic acid'/exp OR 'icosapentaenoic acid' OR 'icosapent ethyl'/exp OR 'icosapent ethyl' OR 'bempedoic acid'/exp OR 'bempedoic acid' OR 'fibrate'/exp OR fibrate OR 'bezafibrate'/exp OR bezafibrate OR 'gemfibrozil'/exp OR gemfibrozil OR 'fenofibrate'/exp OR fenofibrate OR 'ciprofibrate'/exp OR ciprofibrate OR 'evolocumab'/exp OR evolocumab OR 'alirocumab'/exp OR alirocumab OR evinacumab OR 'volanesorsen'/exp OR volanesorsen OR 'vupanorsen'/exp OR vupanorsen OR 'pelacarsen'/exp OR pelacarsen OR 'olezarsen'/exp OR olezarsen OR 'inclisiran'/exp OR inclisiran OR 'olpasiran'/exp OR olpasiran OR 'lipid lowering' | 167569  |

c. The search strategy used in Cochrane library database without language or other additional limits.

| ID | Search | Hits |
|----|--------|------|
|----|--------|------|

|    |                                                                     |         |
|----|---------------------------------------------------------------------|---------|
| 1  |                                                                     |         |
| 2  |                                                                     |         |
| 3  | <b>#1</b>                                                           | 19395   |
| 4  | (Statin OR Simvastatin OR Rosuvastatin OR Atorvastatin OR           |         |
| 5  | Fluvastatin OR Lovastatin OR Pravastatin OR Pitavastatin or         |         |
| 6  | Mevastatin OR ezetimibe OR "Eicosapentaenoic Acid" OR "Icosapent    |         |
| 7  | Ethyl" OR "Bempedoic acid" OR Fibrate OR Bezafibrate OR Gemfibrozil |         |
| 8  | OR Fenofibrate OR Ciprofibrate OR Evolocumab OR Alirocumab OR       |         |
| 9  | Evinacumab OR Volanesorsen OR Vupanorsen OR Pelacarsen OR           |         |
| 10 | Olezarsen OR Inclisiran OR Olpasiran OR Lipid-lowering)             |         |
| 11 |                                                                     |         |
| 12 | <b>#2</b>                                                           | 13623   |
| 13 | "Percutaneous coronary intervention" OR "Coronary angioplasty"      |         |
| 14 | <b>#3</b>                                                           | 1346916 |
| 15 | Random* OR randomized                                               |         |
| 16 | <b>#4</b>                                                           | 690     |
| 17 | #1 AND #2 AND #3                                                    |         |

For peer review only



1  
2  
3  
4  
5  
6  
7  
8  
9  
10  
11  
12  
13  
14  
15  
16  
17  
18  
19  
20  
21  
22  
23  
24  
25  
26  
27  
28  
29  
30  
31  
32  
33  
34  
35  
36  
37  
38  
39  
40  
41  
42  
43  
44  
45  
46  
47  
48  
49  
50  
51  
52  
53  
54  
55  
56  
57  
58  
59  
60

## PRISMA NMA Checklist of Items to Include When Reporting A Systematic Review Involving a Network Meta-analysis

| Section/Topic             | Item # | Checklist Item                                                                                                                                                                                                                                                                                                                                                                                                                                                                                                                                                                                                                                                                                                                                                                                      | Reported on Page # |
|---------------------------|--------|-----------------------------------------------------------------------------------------------------------------------------------------------------------------------------------------------------------------------------------------------------------------------------------------------------------------------------------------------------------------------------------------------------------------------------------------------------------------------------------------------------------------------------------------------------------------------------------------------------------------------------------------------------------------------------------------------------------------------------------------------------------------------------------------------------|--------------------|
| <b>TITLE</b>              |        |                                                                                                                                                                                                                                                                                                                                                                                                                                                                                                                                                                                                                                                                                                                                                                                                     |                    |
| Title                     | 1      | Identify the report as a systematic review <i>incorporating a network meta-analysis (or related form of meta-analysis)</i> .                                                                                                                                                                                                                                                                                                                                                                                                                                                                                                                                                                                                                                                                        | <b>P.1</b>         |
| <b>ABSTRACT</b>           |        |                                                                                                                                                                                                                                                                                                                                                                                                                                                                                                                                                                                                                                                                                                                                                                                                     |                    |
| Structured summary        | 2      | Provide a structured summary including, as applicable:<br><b>Background:</b> main objectives<br><b>Methods:</b> data sources; study eligibility criteria, participants, and interventions; study appraisal; and <i>synthesis methods, such as network meta-analysis</i> .<br><b>Results:</b> number of studies and participants identified; summary estimates with corresponding confidence/credible intervals; <i>treatment rankings may also be discussed</i> .<br><i>Authors may choose to summarize pairwise comparisons against a chosen treatment included in their analyses for brevity</i> .<br><b>Discussion/Conclusions:</b> limitations; conclusions and implications of findings.<br><b>Other:</b> primary source of funding; systematic review registration number with registry name. | P.2                |
| <b>INTRODUCTION</b>       |        |                                                                                                                                                                                                                                                                                                                                                                                                                                                                                                                                                                                                                                                                                                                                                                                                     |                    |
| Rationale                 | 3      | Describe the rationale for the review in the context of what is already known, <i>including mention of why a network meta-analysis has been conducted</i> .                                                                                                                                                                                                                                                                                                                                                                                                                                                                                                                                                                                                                                         | <b>P.3-P.4</b>     |
| Objectives                | 4      | Provide an explicit statement of questions being addressed, with reference to participants, interventions, comparisons, outcomes, and study design (PICOS).                                                                                                                                                                                                                                                                                                                                                                                                                                                                                                                                                                                                                                         | P.4                |
| <b>METHODS</b>            |        |                                                                                                                                                                                                                                                                                                                                                                                                                                                                                                                                                                                                                                                                                                                                                                                                     |                    |
| Protocol and registration | 5      | Indicate whether a review protocol exists and if and where it can be accessed (e.g., Web address); and, if available, provide registration information, including registration number.                                                                                                                                                                                                                                                                                                                                                                                                                                                                                                                                                                                                              | P.4- P.5           |
| Eligibility criteria      | 6      | Specify study characteristics (e.g., PICOS, length of follow-up) and report characteristics (e.g., years considered, language, publication status) used as criteria for eligibility, giving rationale. <i>Clearly describe eligible treatments included in the treatment network, and note whether any have been clustered or merged into the same node (with justification)</i> .                                                                                                                                                                                                                                                                                                                                                                                                                  | <b>P.5-P.6</b>     |
| Information sources       | 7      | Describe all information sources (e.g., databases with dates of coverage, contact with study authors to identify additional studies) in the search and date last searched.                                                                                                                                                                                                                                                                                                                                                                                                                                                                                                                                                                                                                          | P.5                |
| Search                    | 8      | Present full electronic search strategy for at least one                                                                                                                                                                                                                                                                                                                                                                                                                                                                                                                                                                                                                                                                                                                                            | P.5                |

|    |                                        |                                                            |                                                                                                                                                                                                                                                                                                                                   |
|----|----------------------------------------|------------------------------------------------------------|-----------------------------------------------------------------------------------------------------------------------------------------------------------------------------------------------------------------------------------------------------------------------------------------------------------------------------------|
| 1  |                                        | database, including any limits used, such that it could be |                                                                                                                                                                                                                                                                                                                                   |
| 2  |                                        | repeated.                                                  |                                                                                                                                                                                                                                                                                                                                   |
| 3  | Study selection                        | 9                                                          | State the process for selecting studies (i.e., screening, eligibility, included in systematic review, and, if applicable, included in the meta-analysis).                                                                                                                                                                         |
| 4  |                                        |                                                            | P.5-P.6                                                                                                                                                                                                                                                                                                                           |
| 5  | Data collection                        | 10                                                         | Describe method of data extraction from reports (e.g., piloted forms, independently, in duplicate) and any processes for obtaining and confirming data from investigators.                                                                                                                                                        |
| 6  | process                                |                                                            | P.6-P.7                                                                                                                                                                                                                                                                                                                           |
| 7  | Data items                             | 11                                                         | List and define all variables for which data were sought (e.g., PICOS, funding sources) and any assumptions and simplifications made.                                                                                                                                                                                             |
| 8  |                                        |                                                            | P.6-P.7                                                                                                                                                                                                                                                                                                                           |
| 9  | <b>Geometry of the network</b>         | <b>S1</b>                                                  | Describe methods used to explore the geometry of the treatment network under study and potential biases related to it. This should include how the evidence base has been graphically summarized for presentation, and what characteristics were compiled and used to describe the evidence base to readers.                      |
| 10 |                                        |                                                            | <b>P.7</b>                                                                                                                                                                                                                                                                                                                        |
| 11 | Risk of bias within individual studies | 12                                                         | Describe methods used for assessing risk of bias of individual studies (including specification of whether this was done at the study or outcome level), and how this information is to be used in any data synthesis.                                                                                                            |
| 12 |                                        |                                                            | P.7                                                                                                                                                                                                                                                                                                                               |
| 13 | Summary measures                       | 13                                                         | State the principal summary measures (e.g., risk ratio, difference in means). <i>Also describe the use of additional summary measures assessed, such as treatment rankings and surface under the cumulative ranking curve (SUCRA) values, as well as modified approaches used to present summary findings from meta-analyses.</i> |
| 14 |                                        |                                                            | P.7                                                                                                                                                                                                                                                                                                                               |
| 15 | Planned methods of analysis            | 14                                                         | Describe the methods of handling data and combining results of studies for each network meta-analysis. This should include, but not be limited to:                                                                                                                                                                                |
| 16 |                                        |                                                            | <ul style="list-style-type: none"> <li>• <i>Handling of multi-arm trials;</i></li> <li>• <i>Selection of variance structure;</i></li> <li>• <i>Selection of prior distributions in Bayesian analyses;</i></li> <li>and</li> <li>• <i>Assessment of model fit.</i></li> </ul>                                                      |
| 17 |                                        |                                                            | P.7                                                                                                                                                                                                                                                                                                                               |
| 18 | <b>Assessment of Inconsistency</b>     | <b>S2</b>                                                  | Describe the statistical methods used to evaluate the agreement of direct and indirect evidence in the treatment network(s) studied. Describe efforts taken to address its presence when found.                                                                                                                                   |
| 19 |                                        |                                                            | P.7                                                                                                                                                                                                                                                                                                                               |
| 20 | Risk of bias across studies            | 15                                                         | Specify any assessment of risk of bias that may affect the cumulative evidence (e.g., publication bias, selective reporting within studies).                                                                                                                                                                                      |
| 21 |                                        |                                                            | <b>P.7</b>                                                                                                                                                                                                                                                                                                                        |
| 22 | Additional analyses                    | 16                                                         | Describe methods of additional analyses if done, indicating which were pre-specified. This may include, but not be limited to, the following:                                                                                                                                                                                     |
| 23 |                                        |                                                            | <ul style="list-style-type: none"> <li>• Sensitivity or subgroup analyses;</li> <li>• Meta-regression analyses;</li> <li>• <i>Alternative formulations of the treatment network;</i></li> <li>and</li> <li>• <i>Use of alternative prior distributions for Bayesian analyses (if applicable).</i></li> </ul>                      |
| 24 |                                        |                                                            | <b>n/a</b>                                                                                                                                                                                                                                                                                                                        |

**RESULTS†**

|                                          |           |                                                                                                                                                                                                                                                                                                                                                                                                                                                              |                  |
|------------------------------------------|-----------|--------------------------------------------------------------------------------------------------------------------------------------------------------------------------------------------------------------------------------------------------------------------------------------------------------------------------------------------------------------------------------------------------------------------------------------------------------------|------------------|
| Study selection                          | 17        | Give numbers of studies screened, assessed for eligibility, and included in the review, with reasons for exclusions at each stage, ideally with a flow diagram.                                                                                                                                                                                                                                                                                              | P.8              |
| <b>Presentation of network structure</b> | <b>S3</b> | Provide a network graph of the included studies to enable visualization of the geometry of the treatment network.                                                                                                                                                                                                                                                                                                                                            | <b>P.10-P.12</b> |
| <b>Summary of network geometry</b>       | <b>S4</b> | Provide a brief overview of characteristics of the treatment network. This may include commentary on the abundance of trials and randomized patients for the different interventions and pairwise comparisons in the network, gaps of evidence in the treatment network, and potential biases reflected by the network structure.                                                                                                                            | <b>P.10-P.12</b> |
| Study characteristics                    | 18        | For each study, present characteristics for which data were extracted (e.g., study size, PICOS, follow-up period) and provide the citations.                                                                                                                                                                                                                                                                                                                 | P.9-P.10         |
| Risk of bias within studies              | 19        | Present data on risk of bias of each study and, if available, any outcome level assessment.                                                                                                                                                                                                                                                                                                                                                                  | P.9-P.10         |
| Results of individual studies            | 20        | For all outcomes considered (benefits or harms), present, for each study: 1) simple summary data for each intervention group, and 2) effect estimates and confidence intervals. <i>Modified approaches may be needed to deal with information from larger networks.</i>                                                                                                                                                                                      | <b>P.10-P.12</b> |
| Synthesis of results                     | 21        | Present results of each meta-analysis done, including confidence/credible intervals. <i>In larger networks, authors may focus on comparisons versus a particular comparator (e.g. placebo or standard care), with full findings presented in an appendix. League tables and forest plots may be considered to summarize pairwise comparisons.</i> If additional summary measures were explored (such as treatment rankings), these should also be presented. | <b>P.10-P.12</b> |
| <b>Exploration for inconsistency</b>     | <b>S5</b> | Describe results from investigations of inconsistency. This may include such information as measures of model fit to compare consistency and inconsistency models, <i>P</i> values from statistical tests, or summary of inconsistency estimates from different parts of the treatment network.                                                                                                                                                              | <b>P.10-P.12</b> |
| Risk of bias across studies              | 22        | Present results of any assessment of risk of bias across studies for the evidence base being studied.                                                                                                                                                                                                                                                                                                                                                        | P.10-P.12        |
| Results of additional analyses           | 23        | Give results of additional analyses, if done (e.g., sensitivity or subgroup analyses, meta-regression analyses, <i>alternative network geometries studied, alternative choice of prior distributions for Bayesian analyses, and so forth</i> ).                                                                                                                                                                                                              | <i>n/a</i>       |
| <b>DISCUSSION</b>                        |           |                                                                                                                                                                                                                                                                                                                                                                                                                                                              |                  |
| Summary of evidence                      | 24        | Summarize the main findings, including the strength of evidence for each main outcome; consider their relevance to key groups (e.g., healthcare providers, users, and policy-makers).                                                                                                                                                                                                                                                                        | P.12             |

|    |                |    |                                                                                                                                                                                                                                                                                                                                                                                                                                |             |
|----|----------------|----|--------------------------------------------------------------------------------------------------------------------------------------------------------------------------------------------------------------------------------------------------------------------------------------------------------------------------------------------------------------------------------------------------------------------------------|-------------|
| 1  | Limitations    | 25 | Discuss limitations at study and outcome level (e.g., risk of bias), and at review level (e.g., incomplete retrieval of identified research, reporting bias). <i>Comment on the validity of the assumptions, such as transitivity and consistency. Comment on any concerns regarding network geometry (e.g., avoidance of certain comparisons).</i>                                                                            | P.15        |
| 2  |                |    |                                                                                                                                                                                                                                                                                                                                                                                                                                |             |
| 3  |                |    |                                                                                                                                                                                                                                                                                                                                                                                                                                |             |
| 4  |                |    |                                                                                                                                                                                                                                                                                                                                                                                                                                |             |
| 5  |                |    |                                                                                                                                                                                                                                                                                                                                                                                                                                |             |
| 6  |                |    |                                                                                                                                                                                                                                                                                                                                                                                                                                |             |
| 7  |                |    |                                                                                                                                                                                                                                                                                                                                                                                                                                |             |
| 8  | Conclusions    | 26 | Provide a general interpretation of the results in the context of other evidence, and implications for future research.                                                                                                                                                                                                                                                                                                        | P.16        |
| 9  |                |    |                                                                                                                                                                                                                                                                                                                                                                                                                                |             |
| 10 |                |    |                                                                                                                                                                                                                                                                                                                                                                                                                                |             |
| 11 | <b>FUNDING</b> |    |                                                                                                                                                                                                                                                                                                                                                                                                                                |             |
| 12 | Funding        | 27 | Describe sources of funding for the systematic review and other support (e.g., supply of data); role of funders for the systematic review. This should also include information regarding whether funding has been received from manufacturers of treatments in the network and/or whether some of the authors are content experts with professional conflicts of interest that could affect use of treatments in the network. | <b>P.16</b> |
| 13 |                |    |                                                                                                                                                                                                                                                                                                                                                                                                                                |             |
| 14 |                |    |                                                                                                                                                                                                                                                                                                                                                                                                                                |             |
| 15 |                |    |                                                                                                                                                                                                                                                                                                                                                                                                                                |             |
| 16 |                |    |                                                                                                                                                                                                                                                                                                                                                                                                                                |             |
| 17 |                |    |                                                                                                                                                                                                                                                                                                                                                                                                                                |             |
| 18 |                |    |                                                                                                                                                                                                                                                                                                                                                                                                                                |             |
| 19 |                |    |                                                                                                                                                                                                                                                                                                                                                                                                                                |             |
| 20 |                |    |                                                                                                                                                                                                                                                                                                                                                                                                                                |             |

PICOS = population, intervention, comparators, outcomes, study design.

# BMJ Open

## Effectiveness of lipid-lowering therapy on mortality and major adverse cardiovascular event outcomes in patients undergoing percutaneous coronary intervention: a network meta-analysis of randomized controlled trials

|                                 |                                                                                                                                                                                                                                                                                                                                                                                                                                                                                                                                                                                                                                                                                                                                                                                                                                            |
|---------------------------------|--------------------------------------------------------------------------------------------------------------------------------------------------------------------------------------------------------------------------------------------------------------------------------------------------------------------------------------------------------------------------------------------------------------------------------------------------------------------------------------------------------------------------------------------------------------------------------------------------------------------------------------------------------------------------------------------------------------------------------------------------------------------------------------------------------------------------------------------|
| Journal:                        | <i>BMJ Open</i>                                                                                                                                                                                                                                                                                                                                                                                                                                                                                                                                                                                                                                                                                                                                                                                                                            |
| Manuscript ID                   | bmjopen-2022-070827.R3                                                                                                                                                                                                                                                                                                                                                                                                                                                                                                                                                                                                                                                                                                                                                                                                                     |
| Article Type:                   | Original research                                                                                                                                                                                                                                                                                                                                                                                                                                                                                                                                                                                                                                                                                                                                                                                                                          |
| Date Submitted by the Author:   | 14-Oct-2023                                                                                                                                                                                                                                                                                                                                                                                                                                                                                                                                                                                                                                                                                                                                                                                                                                |
| Complete List of Authors:       | Deng, changjiang; Xinjiang Medical University Affiliated First Hospital, Department of Cardiology<br>Yan, Ju; Shaanxi Provincial People's Hospital<br>Zheng, Ying-Ying; Xinjiang Medical University Affiliated First Hospital<br>Wu, Ting-Ting; Xinjiang Medical University Affiliated First Hospital<br>Pan, Ying; Xinjiang Medical University Affiliated First Hospital, Department of Cardiology<br>Hou, Xian-Geng; Xinjiang Medical University Affiliated First Hospital<br>Wang, Si-Fan; Xinjiang Medical University Affiliated First Hospital, Department of Cardiology<br>Sirajidin, Subinur; Xinjiang Medical University Affiliated First Hospital<br>Aimaitijiang, Mikereyi; Xinjiang Medical University Affiliated First Hospital<br>Xie, Xiang; Xinjiang Medical University Affiliated First Hospital, Department of Cardiology |
| <b>Primary Subject Heading</b>: | Cardiovascular medicine                                                                                                                                                                                                                                                                                                                                                                                                                                                                                                                                                                                                                                                                                                                                                                                                                    |
| Secondary Subject Heading:      | Cardiovascular medicine, Pharmacology and therapeutics                                                                                                                                                                                                                                                                                                                                                                                                                                                                                                                                                                                                                                                                                                                                                                                     |
| Keywords:                       | Coronary heart disease < CARDIOLOGY, Coronary intervention < CARDIOLOGY, Lipid disorders < DIABETES & ENDOCRINOLOGY                                                                                                                                                                                                                                                                                                                                                                                                                                                                                                                                                                                                                                                                                                                        |
|                                 |                                                                                                                                                                                                                                                                                                                                                                                                                                                                                                                                                                                                                                                                                                                                                                                                                                            |

SCHOLARONE™  
Manuscripts



I, the Submitting Author has the right to grant and does grant on behalf of all authors of the Work (as defined in the below author licence), an exclusive licence and/or a non-exclusive licence for contributions from authors who are: i) UK Crown employees; ii) where BMJ has agreed a CC-BY licence shall apply, and/or iii) in accordance with the terms applicable for US Federal Government officers or employees acting as part of their official duties; on a worldwide, perpetual, irrevocable, royalty-free basis to BMJ Publishing Group Ltd ("BMJ") its licensees and where the relevant Journal is co-owned by BMJ to the co-owners of the Journal, to publish the Work in this journal and any other BMJ products and to exploit all rights, as set out in our [licence](#).

The Submitting Author accepts and understands that any supply made under these terms is made by BMJ to the Submitting Author unless you are acting as an employee on behalf of your employer or a postgraduate student of an affiliated institution which is paying any applicable article publishing charge ("APC") for Open Access articles. Where the Submitting Author wishes to make the Work available on an Open Access basis (and intends to pay the relevant APC), the terms of reuse of such Open Access shall be governed by a Creative Commons licence – details of these licences and which [Creative Commons](#) licence will apply to this Work are set out in our licence referred to above.

Other than as permitted in any relevant BMJ Author's Self Archiving Policies, I confirm this Work has not been accepted for publication elsewhere, is not being considered for publication elsewhere and does not duplicate material already published. I confirm all authors consent to publication of this Work and authorise the granting of this licence.

1 **Effectiveness of lipid-lowering therapy on mortality and**  
2 **major adverse cardiovascular event outcomes in patients**  
3 **undergoing percutaneous coronary intervention: a network**  
4 **meta-analysis of randomized controlled trials**

5 Chang-Jiang Deng<sup>1</sup>, Ju Yan<sup>2</sup>, Ying-Ying Zheng<sup>1</sup>, Ting-Ting Wu<sup>1</sup>, Ying Pan<sup>1</sup>, Xian-

6 Geng Hou<sup>1</sup>, Si-Fan Wang<sup>1</sup>, Subinur Sirajidin<sup>1</sup>, Mikereyi Aimaitijiang<sup>1</sup>, Xiang Xie<sup>1</sup>

7 1. Department of Cardiology, The First Affiliated Hospital of Xinjiang Medical

8 University, Urumqi, 830011, P.R. China.

9 2. Department of Cardiology, Shaanxi Provincial People's Hospital, Xi'an,

10 710000, P.R. China.

11 Correspondence authors:

12 Xiang Xie, No. 137, Liyushan Road, Department of Cardiology, First Affiliated

13 Hospital of Xinjiang Medical University, Urumqi, 830011 P.R., China. Tel:

14 +8609914366168; Email: xiangxie999@sina.com

15 **Abstract**

16 **Background**

17 Emergency percutaneous coronary intervention (PCI) can quickly restore myocardial  
18 perfusion after acute coronary syndrome (ACS). Whether and which lipid-lowering  
19 regimens are effective in reducing major adverse cardiovascular events (MACEs) and  
20 mortality risk after PCI remain unclear.

21

22 **Objective**

1  
2  
3  
4 23 This study assessed the benefits of different lipid-lowering regimens on the risk of  
5  
6 24 MACEs and mortality in the post-PCI population by network meta-analysis.  
7  
8

## 9 25 **Methods**

10  
11 26 Public databases, including PubMed, Embase, and the Cochrane Library, were  
12  
13  
14 27 searched from inception to August 2022. Randomized controlled trials (RCTs) on  
15  
16  
17 28 lipid-lowering regimens in post-PCI populations were included and analysed. The  
18  
19  
20 29 outcomes were the incidence of all-cause mortality and MACEs, whether reported as  
21  
22 30 dichotomous variables or as hazard ratios (HRs).  
23  
24

## 25 31 **Results**

26  
27 32 Thirty-nine RCTs were included. For MACEs, alirocumab plus rosuvastatin (OR:  
28  
29 33 0.18; 95% CI: 0.07-0.44), evolocumab plus ezetimibe and statins (OR: 0.19; 95% CI:  
30  
31 34 0.06-0.59), eicosapentaenoic acid (EPA) plus pitavastatin (HR: 0.67; 95% CI: 0.49-  
32  
33 35 0.96), and icosapent ethyl plus statins (HR: 0.73; 95% CI: 0.62-0.86) had significant  
34  
35 36 advantages and relatively high rankings. For mortality, rosuvastatin (OR: 0.30; 95%  
36  
37 37 CI: 0.11-0.84), ezetimibe plus statins (OR: 0.55; 95% CI: 0.43-0.89) and icosapent  
38  
39 38 ethyl plus statins (OR: 0.66; 95% CI: 0.45-0.96) had significant advantages compared  
40  
41  
42  
43  
44  
45 39 to the control.  
46  
47

## 48 40 **Conclusion**

49  
50 41 EPA, especially icosapent ethyl, plus statins had a beneficial effect on reducing the  
51  
52  
53 42 risk of MACEs and mortality in post-PCI patients. PCSK9is plus statins were able to  
54  
55  
56 43 reduce the risk of MACEs, but the risk of mortality remained unclear.  
57

58 44 **Key words:** lipid-lowering therapy, major adverse cardiovascular events, mortality,  
59  
60



1  
2  
3  
4 45 network meta-analysis  
5

6  
7 46 **Strengths and limitations of this study**  
8

9 47 Only RCTs with high overall design quality were considered for inclusion.  
10

11 48 MACE and mortality were adopted as outcomes with little influence from subjective  
12  
13 49 factors.

14  
15  
16 50 this meta-analysis was based on the study level instead of the individual level.  
17

18  
19 51 The criteria for defining MACEs varied among studies.  
20

21  
22 52 Many included studies only reported dichotomous outcomes but did not report the HR  
23  
24 53 results.  
25

26  
27 54  
28 55 **Introduction**  
29

30 56 Acute coronary syndrome (ACS) is a term used to refer to a range of conditions  
31  
32 57 associated with acute myocardial ischaemia and/or infarction, which are usually due  
33  
34 58 to coronary artery occlusion and acute ischaemic necrosis of the myocardium due to  
35  
36 59 progression of coronary atherosclerotic lesions(1, 2). Emergency percutaneous  
37  
38 60 coronary intervention (PCI) can quickly restore myocardial perfusion(3). Although  
39  
40 61 the development of technological and procedural PCI has resulted in substantial  
41  
42 62 improvements in clinical outcomes, recurrent coronary events may still occur after  
43  
44 63 PCI(4).  
45  
46  
47  
48  
49

50 64 The view of "residual cardiovascular risk" was introduced because MACEs still  
51  
52 65 occurs in some patients who underwent PCI during follow-up. PCI can treat focal  
53  
54 66 manifestations of systemic progressive disease, but the residual risk of acute coronary  
55  
56 67 syndrome is largely related to the systemic proatherosclerotic effect of poorly  
57  
58  
59  
60

1  
2  
3  
4 68 controlled cardiovascular risk factors(4). Lowering lipid levels, especially LDL-C,  
5  
6  
7 69 can halt the progression of coronary atherosclerosis and improve cardiovascular  
8  
9  
10 70 outcomes. Based on this view, it is believed that long-term optimal lipid-lowering  
11  
12 71 therapy is effective in reducing long-term cardiovascular events after PCI. However,  
13  
14 72 this view was still subject to challenges.

15  
16  
17 73  
18  
19  
20 74 Based on data from the “Korea Acute Myocardial Infarction Registry”, the proponents  
21  
22 75 concluded that patients treated with statins had significantly lower rates of MACEs,  
23  
24 76 all-cause death, and cardiac death during the 2-year follow-up period after PCI  
25  
26  
27 77 application(5). However, a study of postoperative follow-up of PCI patients enrolled  
28  
29  
30 78 in the Melbourne Interventional Group registry concluded that statins have no  
31  
32 79 significant beneficial effect on MACEs after PCI(6). The controversy may be  
33  
34  
35 80 explained by two concepts: on the one hand, the optimal lipid reduction target may  
36  
37  
38 81 not be achieved by using single statins(7,8). On the other hand, long-term high-dose  
39  
40 82 application of statins increases the risk of intracerebral haemorrhage and other side  
41  
42  
43 83 effects(9,10).

44  
45  
46 84  
47  
48 85 There is a consensus on preloading high-dose statins to reduce MACEs in the  
49  
50 86 perioperative period with PCI(11,12). However, there is still insufficient evidence for  
51  
52  
53 87 the continued application of lipid-lowering drugs to reduce the risk of long-term  
54  
55  
56 88 MACEs and mortality. This study assessed the benefits of different lipid-lowering  
57  
58 89 regimens on the risk of MACEs and mortality in the post-PCI population by network  
59  
60

1  
2  
3  
4 90 meta-analysis.  
5  
6

7 91

8  
9 92 **Methods**

10  
11 93 This study was performed in accordance with the Preferred Reporting Items for

12  
13 94 Systematic Reviews and Meta-Analyses (PRISMA) guidelines. The study was

14  
15 95 registered with PROSPERO (CRD 42018099600).  
16  
17

18  
19 96 **Patient and Public Involvement**

20  
21 97 None  
22  
23

24  
25 98

26  
27 99 **Search strategy**

28  
29 100 Public literature databases, including PubMed, Embase, and the Cochrane Library,

30  
31 101 were searched from inception to August 2022 without language restrictions using the

32  
33 102 following search terms: (lipid-lowering or statin or simvastatin or rosuvastatin or

34  
35 103 atorvastatin or fluvastatin or lovastatin or pravastatin or pitavastatin or mevastatin or

36  
37 104 ezetimibe or “eicosapentaenoic acid” or “icosapent ethyl” or “bempedoic acid” or

38  
39 105 fibrate or bezafibrate or gemfibrozil or fenofibrate or ciprofibrate or evolocumab or

40  
41 106 alirocumab or evinacumab or volanesorsen or vupanorsen or pelacarsen or olezarsen

42  
43 107 or inclisiran or olpasiran) and (“percutaneous coronary intervention” or “coronary

44  
45 108 angioplasty”) and (random\* or randomized or randomized). The details of the full

46  
47 109 search strategy are listed in the Supplementary file. The references of relevant

48  
49 110 systematic reviews and meta-analyses were also searched to avoid omissions. The two

50  
51 111 authors conducted literature retrieval independently, and any conflicts were resolved  
52  
53  
54  
55  
56  
57  
58  
59  
60

1  
2  
3  
4 112 through discussion with the third author.  
5  
6

7 113  
8

9 114 **Inclusion and exclusion criteria**  
10

11 115 The literature was included if it met the following criteria: 1) the study adopted a  
12  
13 116 randomized controlled study design; 2) the study included patients who underwent  
14  
15 117 PCI surgery or reported the subgroup of the population that underwent PCI; 3) the  
16  
17 118 lipid-lowering regimen was applied to the population of the intervention group; 4) the  
18  
19 119 control group used a different lipid-lowering agent or regimen; and 5) the study  
20  
21 120 reported the outcome of mortality and/or MACEs. The exclusion criteria were as  
22  
23 121 follows: 1) as preloading of statins before PCI was shown to have clear benefits, to  
24  
25 122 determine whether application of lipid-lowering drugs after PCI also had beneficial  
26  
27 123 effects, this work excluded studies on the preloading application of lipid-lowering  
28  
29 124 drugs before PCI; and 2) although high-dose lipid-lowering agents, such as statins,  
30  
31 125 have a better lipid-lowering effect, long-term application may bring potential side  
32  
33 126 effects(9,13). Therefore, only studies in which all agents were considered to be  
34  
35 127 applied at reasonable doses were included, and dose–response studies were excluded.  
36  
37 128 In addition, repeatedly published studies, protocols, conference abstracts, reviews,  
38  
39 129 comments and editorials were also excluded.  
40  
41  
42  
43  
44  
45  
46  
47  
48  
49

50 130  
51

52 131 **Data extraction and quality assessment**  
53

54 132 Two authors independently extracted the information from the included studies. The  
55  
56 133 contents include the name of the first author, publication year, study location, sample  
57  
58  
59  
60

1  
2  
3  
4 134 size (population that underwent PCI), study abbreviation and registration number,  
5  
6 135 lipid-lowering intervention and control, and follow-up time.  
7  
8

9 136

10  
11 137 The outcomes analysed were the incidence of all-cause mortality and MACEs,  
12  
13 138 whether reported as dichotomous or hazard ratio (HR) statistics based on Cox  
14  
15 139 regression. The MACE outcome was selected to most closely approximate the  
16  
17 140 composite endpoint, including mortality, MI, stroke, coronary revascularization, and  
18  
19 141 restenosis. Study quality was assessed by two investigators using the Cochrane risk of  
20  
21 142 bias assessment tool, which included random sequence generation, allocation  
22  
23 143 concealment, blinding of participants and personnel, blinding of outcome assessment,  
24  
25 144 incomplete outcome data, selective reporting, and other potential biases.  
26  
27  
28  
29  
30  
31  
32  
33

34 145

35 146 Statistical analysis

36  
37 147 We conducted frequentist network meta-analysis (NMA) using random-effects  
38  
39 148 models weighted by the inverse variance method. Odds ratios (ORs) and 95%  
40  
41 149 confidence intervals (CIs) were used for dichotomous outcomes. The hazard ratios  
42  
43 150 (HRs) and 95% CIs based on Cox regression results were also pooled for reporting. If  
44  
45 151 the HR value was not reported but there was a Kaplan–Meier survival curve, the HR  
46  
47 152 value was extracted from the curve by GetData Graph Digitizer software version 2.24.  
48  
49  
50  
51 153 In network plots, the direct comparisons among treatment arms are shown, the end of  
52  
53 154 each line indicates a treatment arm, and the thickness of the lines indicates the number  
54  
55 155 of studies comparing the two treatments. Forest plots were used to describe the  
56  
57  
58  
59  
60

1  
2  
3  
4 156 network comparison results between each treatment and the control.  
5  
6  
7 157 The restricted maximum likelihood estimation was used to quantify network  
8  
9 158 heterogeneity. The Q statistic was used to assess the sum of statistics for  
10  
11  
12 159 heterogeneity (within designs) and for overall inconsistency (between designs)(14).  
13  
14 160 The ranking probabilities of each regimen were estimated using the surface under the  
15  
16  
17 161 cumulative ranking curve (SUCRA), which was the ratio of the area under the curve  
18  
19  
20 162 to the entire area. A comparison-adjusted funnel plot was used to examine potential  
21  
22 163 publication biases in the NMA. P values of less than 0.05 were considered to indicate  
23  
24  
25 164 statistical significance. The NMA was performed using R language with the  
26  
27 165 “netmeta” package.  
28  
29  
30  
31  
32

## 33 **Results**

34  
35 168 After removing duplicates, we obtained 1588 literature items. After screening the  
36  
37  
38 169 titles and abstracts, 1515 irrelevant studies were excluded. Seventy-three articles were  
39  
40  
41 170 screened for full text. The following articles were excluded: dose–response studies  
42  
43 171 (8); those where no PCI population or subgroup was reported (6); those where no  
44  
45  
46 172 mortality or MACE-related outcomes were reported (6); repeated publications (5);  
47  
48  
49 173 studies related to preloading of lipid-lowering agents (4); studies unrelated to lipid-  
50  
51 174 lowering agents (3); a protocol study (1); and a study with a non-RCT design (1).  
52  
53  
54 175 Finally, 39 articles were included, containing 54478 post-PCI patients (15-53) (Figure  
55  
56 176 1).

### 57 58 **Table 1. The characteristics of included studies**

59  
60

| Study                          | Location    | Sample size | Abbreviation     | Register ID         | Intervention                                                  | Control                | Follow-up# |
|--------------------------------|-------------|-------------|------------------|---------------------|---------------------------------------------------------------|------------------------|------------|
| Lorenz Råber 2022 [15]         | European    | 300         | PACMAN-AMI       | NCT03067844         | Alirocumab;rosuvastatin                                       | Placebo;rosuvastatin   | 52W        |
| Peterson, B. E. 2022 [16]      | Multicenter | 3408        | REDUCE-IT PCI    | NCT01492361         | Icosapent ethyl;statins                                       | Placebo;statins        | 4.8Y       |
| Remo H.M. Furtado 2022 [17]    | Multicenter | 17073       | FOURIER          | NCT01764633         | Evolocumab;statins                                            | Placebo;statins        | 2.2Y       |
| Tomoaki Okada 2022 [18]        | Japan       | 102         | -                | UMIN000028729       | Evolocumab;pitavastatin                                       | Pitavastatin           | 4W         |
| Yan Hao 2022 [19]              | China       | 136         | -                | -                   | Evolocumab;atorvastatin;ezetimibe                             | Ezetimibe;atorvastatin | 3M         |
| Deng YF 2021 [20]              | China       | 90          | -                | -                   | Ezetimibe;atorvastatin                                        | Atorvastatin           | 1Y         |
| Sun C 2021 [21]                | China       | 171         | -                | ChiCTR-IPR-17012219 | Ezetimibe;rosuvastatin                                        | Rosuvastatin           | 3M         |
| Weifeng He 2020 [22]           | China       | 192         | -                | -                   | Atorvastatin vs. Rosuvastatin vs. Simvastatin                 | -                      | 6M         |
| Kiyoshi Hibi 2018 [23]         | Japan       | 128         | Ezetimibe-ACS    | NCT00549926         | Ezetimibe;pitavastatin                                        | Pitavastatin           | 1Y         |
| Eui Im 2017 [24]               | Korea       | 2000        | -                | NCT01557075         | Atorvastatin                                                  | Pravastatin            | 1Y         |
| Hagiwara N 2017 [25]           | Japan       | 1734        | HIJ-PROPER       | UMIN000002742       | Ezetimibe;pitavastatin                                        | Pitavastatin           | 36M        |
| J Guo 2017 [26]                | China       | 137         | -                | -                   | Rosuvastatin                                                  | Control                | 1Y         |
| Wang YB 2017 [27]              | China       | 132         | -                | ChiCTR-IPR-15007035 | Pitavastatin                                                  | Atorvastatin           | 6M         |
| Watanabe T 2017 [28]           | Japan       | 193         | CHERRY           | UMIN000002815       | EPA;pitavastatin                                              | Pitavastatin           | 6-8M       |
| Zhi Liu 2017 [29]              | China       | 102         | -                | -                   | Ezetimibe;atorvastatin                                        | atorvastatin 20mg/d    | 1Y         |
| Kazumasa Nosaka 2016 [30]      | Japan       | 241         | -                | UMIN000016723       | EPA;pitavastatin                                              | Pitavastatin           | 1Y         |
| Kensuke Matsushita 2016 [31]   | Japan       | 118         | Yokohama-ACS     | NCT00549926         | Atorvastatin vs. Pitavastatin vs. Pravastatin vs. Fluvastatin | -                      | 10.3M      |
| Christopher P Cannon 2015 [32] | Multicenter | 12941       | IMPROVE-IT       | NCT00202878         | Ezetimibe;simvastatin                                         | Simvastatin            | 6M         |
| Kenichi Tsujita 2015 [33]      | Multicenter | 246         | PRECISE-IVUS     | NCT01043380         | Ezetimibe;atorvastatin                                        | Atorvastatin           | 1Y         |
| Stephen J. Nicholls 2015 [34]  | Multicenter | 3295        | VISTA-16         | NCT01130246         | Varespladib;atorvastatin                                      | Placebo;atorvastatin   | 6M         |
| Zhang JR 2015 [35]             | China       | 104         | -                | -                   | Atorvastatin                                                  | Rosuvastatin           | 6M         |
| Mario Leoncin 2014 [36]        | Italy       | 333         | PRATO-ACS        | NCT01185938         | Rosuvastatin                                                  | Control                | 6M         |
| HiroYuki Takano 2013 [37]      | Japan       | 458         | PEARL            | UMIN000000428       | Pitavastatin                                                  | Control                | 35.5M      |
| Tsuyoshi Nozue 2013 [38]       | Japan       | 164         | TRUTH            | UMIN000004627       | Pitavastatin                                                  | Pravastatin            | 2Y         |
| Jean-Marc Lablanche 2010 [39]  | Multicenter | 887         | CENTAURUS        | NCT00296387         | Rosuvastatin                                                  | Atorvastatin           | 3M         |
| C. Michael Gibson 2009 [40]    | US          | 2868        | PROVE IT-TIMI 22 | NCT00382460         | Atorvastatin                                                  | Pravastatin            | 2Y         |
| Han Yaling 2009 [41]           | China       | 1275        | -                | NCT00405717         | Atorvastatin                                                  | Pravastatin            | 1Y         |

|                                        |             |      |                          |             |                    |              |      |
|----------------------------------------|-------------|------|--------------------------|-------------|--------------------|--------------|------|
| <b>Takafumi Hiro 2009 [42]</b>         | Japan       | 307  | JAPAN-ACS                | NCT00242944 | Pitavastatin       | Atorvastatin | 1Y   |
| <b>Tomotaka Dohi 2009 [43]</b>         | Japan       | 180  | Extended-ESTABLISH trial | -           | Atorvastatin       | Control      | 4Y   |
| <b>Toru Toi 2009 [44]</b>              | Japan       | 160  | -                        | -           | Pitavastatin       | Atorvastatin | 17D  |
| <b>Xu Kai 2007 [45]</b>                | China       | 648  | -                        | -           | Atorvastatin       | Control      | 2Y   |
| <b>Bae JH 2004 [46]</b>                | Korea       | 205  | -                        | -           | Atorvastatin       | Control      | 6M   |
| <b>Patrick W J C Serruys 2002 [47]</b> | Multicenter | 1677 | LIPS                     | -           | Fluvastatin        | Placebo      | 3.9Y |
| <b>Han J.G.H. Mulder 2000 [48]</b>     | Netherlands | 201  | REGRESS                  | -           | Pravastatin        | Placebo      | 2Y   |
| <b>Greg C. Flaker 1999 [49]</b>        | Multicenter | 1154 | CARE trial               | -           | Pravastatin        | Placebo      | 6Y   |
| <b>MICHEL E. BERTRAND 1997 [50]</b>    | France      | 695  | PREDICT                  | -           | Pravastatin        | Placebo      | 6M   |
| <b>J H O'Keefe Jr 1996 [51]</b>        | US          | 200  | APPLE                    | -           | Probuco;lovastatin | Placebo      | 6M   |
| <b>Haruhiko Onaka 1994 [52]</b>        | Japan       | 66   | -                        | -           | Pravastatin        | Control      | 5M   |
| <b>Rakesh Sahni 1991 [53]</b>          | US          | 157  | -                        | -           | Lovastatin         | Control      | 6M   |

178 Abbreviations: EPA: eicosapentaenoic acid.

179 #: Follow-up period: Y: years; M: months; W: weeks; D: days

180 Among the included studies, the publication period ranged from 1991 to 2022. The  
 181 research locations were mainly in Asia (China, Japan and South Korea), Europe  
 182 (Netherlands, France, and Italy), America, and multiple centres. There were 10 studies  
 183 with sample sizes greater than 1000 patients. There were also 22 studies with publicly  
 184 available clinical study registration numbers (Table 1). In terms of design quality, all  
 185 included studies were RCTs. Therefore, the design quality was generally high. The  
 186 main factors potentially affecting design quality were the blinding of participants and  
 187 personnel and blinding of outcome assessment (Figure 2). However, as the desired  
 188 outcomes were mortality and MACEs, the subjective factors of the investigator had  
 189 little influence on the outcomes.

190 As two studies did not specify the types of statins, the network meta-analysis was  
 191 divided into two parts. One part was analysed based on specific types of statins, and



1  
2  
3  
4 192 the other was based on taking statins as a whole. For the dichotomous results of  
5  
6 193 MACEs, the NMA based on specific types of statins included 18 lipid-lowering  
7  
8  
9 194 regimens. The Q test for heterogeneity ( $p = 0.07$ ) and inconsistency ( $p = 0.16$ ) were  
10  
11  
12 195 nonsignificant, indicating no evidence of heterogeneity or inconsistency in the NMA.  
13

14 196 In pairwise comparisons with the control, alirocumab plus rosuvastatin (OR: 0.18;  
15  
16  
17 197 95% CI: 0.07-0.44; SUCRA: 0.94), evolocumab plus atorvastatin and ezetimibe (OR:  
18  
19  
20 198 0.18; 95% CI: 0.05-0.63; SUCRA: 0.90), and ezetimibe plus rosuvastatin (OR: 0.29;  
21  
22 199 95% CI: 0.11-0.76; SUCRA: 0.80) had significant advantages and relatively high  
23  
24  
25 200 SUCRA rankings. No potential publication bias was found according to the  
26  
27  
28 201 comparison-adjusted funnel plot (Figure 3).  
29

30  
31  
32 203 In the NMA based on taking statins as a whole, ten regimens were analysed.  
33  
34  
35 204 Evolocumab plus ezetimibe and statins (OR: 0.19; 95% CI: 0.06-0.59; SUCRA: 0.92),  
36  
37  
38 205 alirocumab plus statins (OR: 0.27; 95% CI: 0.13-0.59; SUCRA: 0.87), and icosapent  
39  
40  
41 206 ethyl plus statins (OR: 0.39; 95% CI: 0.25-0.62; SUCRA: 0.72) had significant  
42  
43  
44 207 advantages and relatively high SUCRA rankings. No potential publication bias was  
45  
46  
47 208 found.  
48

49  
50  
51 210 For the HR results of MACEs, the NMA based on specific types of statins included  
52  
53  
54 211 nine regimens. The Q test for heterogeneity was nonsignificant ( $p = 0.964$ ) because  
55  
56  
57 212 the network comparisons lacked loops. Therefore, the results were considered  
58  
59  
60 213 consistent. Compared to the control, eicosapentaenoic acid (EPA) plus pitavastatin

1  
2  
3  
4 214 (HR: 0.67; 95% CI: 0.49-0.96; SUCRA: 0.91), atorvastatin (HR: 0.76; 95% CI: 0.63-  
5  
6 215 0.90; SUCRA: 0.83), and varespladib plus atorvastatin (HR: 0.77; 95% CI: 0.61-0.97;  
7  
8  
9 216 SUCRA: 0.77) had significant advantages and relatively high SUCRA rankings.  
10  
11  
12 217 Potential publication bias was not analysed due to the small number of included  
13  
14 218 studies.

15  
16  
17 219  
18  
19 220 In the NMA based on taking statins as a whole, seven regimens were analysed. EPA  
20  
21 221 plus statins (HR: 0.60; 95% CI: 0.42-0.85; SUCRA: 0.96) and icosapent ethyl plus  
22  
23 222 statins (HR: 0.73; 95% CI: 0.62-0.86; SUCRA: 0.81) had significant advantages over  
24  
25 223 the control.

26  
27  
28  
29  
30 224  
31  
32 225 For the dichotomous mortality results, the NMA based on specific types of statins  
33  
34 226 included 17 lipid-lowering regimens. The Q test for heterogeneity ( $p = 0.78$ ) and  
35  
36 227 inconsistency ( $p = 0.99$ ) were nonsignificant. Due to the rare occurrence of events, the  
37  
38 228 results of the comparison had low precision with a large standard error. Compared to  
39  
40 229 the control, only rosuvastatin (OR: 0.30; 95% CI: 0.11-0.84; SUCRA: 0.79) showed a  
41  
42 230 significantly better effect. Ezetimibe plus rosuvastatin had a relatively high SUCRA  
43  
44 231 ranking, but there was no significant difference compared to the control (OR: 0.14;  
45  
46 232 95% CI: 0.02-1.26; SUCRA: 0.86). No potential publication bias was found (Figure  
47  
48 233 4).

49  
50  
51 234  
52  
53  
54  
55  
56  
57  
58 235 In the NMA based on taking statins as a whole, nine regimens were analysed.  
59  
60

1  
2  
3  
4 236 Ezetimibe plus statins (OR: 0.55; 95% CI: 0.43-0.89; SUCRA: 0.75) and icosapent  
5  
6 237 ethyl plus statins (OR: 0.66; 95% CI: 0.45-0.96; SUCRA: 0.63) had significant  
7  
8 238 advantages compared with the blank control group. No potential publication bias  
9  
10 239 existed. NMA analysis was not performed due to the small number of studies  
11  
12 240 reporting HRs for mortality (Figure 5).  
13  
14  
15  
16  
17  
18  
19

## 20 242 **Discussion**

21  
22 243 This study analysed the benefits of lipid-lowering therapy on mortality and MACE  
23  
24 244 outcomes in patients who underwent PCI by network meta-analysis. The results  
25  
26 245 showed that several lipid-lowering regimens could reduce the risk of MACEs  
27  
28 246 compared with the blank control. Icosapent ethyl plus statins had the benefit of  
29  
30 247 reducing both the risk of MACEs and mortality. However, EPA plus statins had more  
31  
32 248 advantages in reducing the risk of MACEs. Of note, based on the current evidence,  
33  
34 249 alirocumab and evolocumab plus statins had obvious advantages in reducing the risk  
35  
36 250 of MACEs but had no obvious benefit in reducing the risk of mortality.  
37  
38  
39  
40  
41  
42  
43  
44

45 252 EPA is a long-chain omega-3 polyunsaturated fatty acid. Long-term intake of EPA  
46  
47 253 can reduce the residual cardiovascular risk to reduce the risk of MACEs(54). In terms  
48  
49 254 of pathological mechanisms, EPA combined with pitavastatin was shown to reduce  
50  
51 255 the lipid volume of coronary artery plaques and total atherosclerotic plaque volume in  
52  
53 256 patients who underwent PCI, which may be the reason for the reduced risk of  
54  
55 257 MACEs(55).  
56  
57  
58  
59  
60

1  
2  
3  
4 258

5  
6 259 Icosapent ethyl is a highly purified and stable eicosapentaenoic acid ethyl ester that  
7  
8  
9 260 has potential higher anti-inflammatory, antioxidant, plaque stability and cell  
10  
11 261 membrane stability effects(56). In the NMA results, icosapent ethyl plus statins had  
12  
13  
14 262 significant benefits for reducing the risk of either mortality or MACEs in patients who  
15  
16  
17 263 underwent PCI, which was an ideal regimen for the population.  
18

19 264

20  
21  
22 265 Ezetimibe inhibits the absorption of cholesterol and has a synergistic lipid-lowering  
23  
24 266 pharmacological effect with statins to further reduce the risk of death and MACEs. In  
25  
26  
27 267 particular, when combined with rosuvastatin, ezetimibe has a stronger lipid-lowering  
28  
29  
30 268 effect with a high safety profile without the risk of drug interactions(57). Our NMA  
31  
32  
33 269 results also showed that ezetimibe can reduce the risk of MACEs and mortality.

34  
35 270 According to the guidelines for the management of dyslipidaemia from the European  
36  
37  
38 271 Society of Cardiology and the European Atherosclerosis Society, ezetimibe was  
39  
40  
41 272 recommended if the LDL-C target was not reached(58,59). The American College of  
42  
43  
44 273 Cardiology guidelines also recommend adding ezetimibe when using maximally  
45  
46 274 tolerated statin therapy and if LDL-C levels remained  $\geq 70$  mg/dL(60). These benefits  
47  
48 275 have also been demonstrated in the secondary prevention of PCI.  
49

50 276

51  
52  
53 277 Alirocumab and evolocumab are both proprotein convertase subtilisin/kexin type-9  
54  
55  
56 278 inhibitors (PCSK9is), which can increase the level of LDL receptor in the liver, thus  
57  
58  
59 279 improving the ability of the liver to bind LDL-C and reducing the level of peripheral  
60

1  
2  
3  
4 280 LDL-C(61). There was also a synergistic lipid-lowering pharmacological effect when  
5  
6 281 PCSK9is were combined with statins that resulted in a significantly reduced LDL-C  
7  
8  
9 282 concentration and atherosclerosis event risk; however, there was still controversy  
10  
11 283 regarding the mortality risk reduction(62). It has been suggested that the powerful  
12  
13  
14 284 effect of PCSK9is on reducing LDL-C predisposes patients to hypocholesterolaemia,  
15  
16  
17 285 which will not increase the risk of cerebral haemorrhage. PCSK9is may be the  
18  
19 286 preferred lipid-lowering agents in patients with elevated ICH risk (63-65). On the  
20  
21  
22 287 other hand, PCSK9is did not reduce serum inflammatory factors in one study,  
23  
24  
25 288 suggesting that they may not reduce the risk of residual inflammation in the post-PCI  
26  
27  
28 289 population(66).

29  
30 290  
31  
32 291 In the results of this study, lipid-lowering therapy strategies had general advantages in  
33  
34  
35 292 reducing MACE risk. However, for all-cause mortality, the advantage of lipid-  
36  
37  
38 293 lowering therapy was not obvious. Based on dichotomous outcomes of mortality,  
39  
40  
41 294 some strategies may even have a tendency to increase the mortality risk. This  
42  
43  
44 295 challenges the opinion that lipid-lowering therapy is recommended after PCI(67). A  
45  
46  
47 296 large sample size retrospective study suggests that statins can reduce the risk of all-  
48  
49  
50 297 cause death in patients with coronary artery disease undergoing PCI, regardless of  
51  
52  
53 298 individual cholesterol levels(68). Alternatively, the “lipid paradox” view has been  
54  
55  
56 299 proposed and indicates that higher levels of LDL-C and triglycerides on admission are  
57  
58  
59 300 associated with better clinical outcomes. Especially in patients with ST-elevation  
60 301 myocardial infarction, lower LDL-C levels were associated with worse mortality

1  
2  
3  
4 302 outcomes(69). However, this view is also controversial(70).  
5

6  
7 303

8  
9 304 On the other hand, it is possible that the contribution of LDL-C reduction to the risk  
10

11 305 of mortality outcomes is obscured by other confounding factors. For example,  
12

13  
14 306 inflammatory status may also have had an important impact on patient mortality risk.  
15

16  
17 307 In a cohort of post-PCI patients with low LDL-C levels, residual inflammatory risk  
18

19 308 also had a significant effect on overall mortality(71). C-reactive protein can also  
20

21  
22 309 predict long-term mortality in post-PCI patients independent of LDL-C levels(72). In  
23

24  
25 310 addition, cardiac remodelling also has an important impact on the survival outcome of  
26

27 311 post-PCI patients(73).  
28

29  
30 312 There are several limitations in this study. First, this analysis was based on the study  
31

32 313 level instead of the individual level, making it difficult to consider the individual  
33

34  
35 314 confounding factors in the analysis. Second, two included studies did not specify the  
36

37  
38 315 type of statins, so our study had to be analysed separately according to whether all  
39

40 316 statins were considered as a whole. Third, the criteria for defining MACEs varied  
41

42  
43 317 among studies, which contributed to heterogeneity among the study results. Fourth,  
44

45 318 many included studies only reported dichotomous outcomes but did not report the HR  
46

47  
48 319 results, resulting in missing relevant data for the analysis.  
49

50  
51 320

52  
53 321

54  
55  
56 322 In conclusion, the results of this study suggested that EPA, especially icosapent ethyl,  
57

58 323 plus statins had a beneficial effect on reducing the risk of MACEs and mortality in  
59  
60

1  
2  
3  
4 324 post-PCI patients. PCSK9is plus statins were able to reduce the risk of MACEs, but  
5  
6 325 the effects on the risk of mortality remained unclear.  
7  
8  
9 326  
10 327  
11 328  
12 329

### 15 330 **Acknowledgements**

17 331 We thank Professor Xiang Xie for his support.  
18  
19 332

### 20 333 **Author contributions**

22 334 Chang-Jiang Deng completed the manuscript, Ju Yan, Ting-Ting Wu, Ying Pan, Ying-  
23 335 Ying Zheng guided the data analysis and the production of the figures, Xian-Geng  
24 336 Hou, Si-Fan Wang, Subinur Sirajidin, Mikereyi Aimaitijiang, Xiang Xie read and  
25 337 approved the final manuscript.  
26  
27 338  
28  
29  
30

### 31 339 **Funding**

32 340 No funding  
33  
34 341

### 35 342 **Availability of data and materials**

37 343 the datasets used or analysed during the current study are available from the  
38 344 corresponding author on reasonable request.  
39  
40  
41 345

### 42 346 **Declarations**

43 347  
44  
45

### 46 348 **Ethics approval and consent to participate**

47 349 This study does not involve human participants and ethical approval was not required.  
48  
49 350

### 50 351 **Consent for publication**

51 352 not applicable.  
52  
53 353  
54  
55

### 56 354 **Competing interests**

57 355 The authors declare that they have no competing interests.  
58  
59  
60

356

357

358

359

360 **References**

361 [dataset]1.Yoshihara S (2022) Acute coronary syndrome on non-electrocardiogram-  
362 gated contrast-enhanced computed tomography. *World J Radiol*14(2):30-46.

363 [dataset]2.Ferri N, Ruscica M, Lupo MG, Vicenzi M, Sirtori CR, Corsini A (2022)  
364 Pharmacological rationale for the very early treatment of acute coronary syndrome  
365 with monoclonal antibodies anti-PCSK9. *Pharmacol Res* 184:106439.

366 [dataset]3.Feng KF, Wu M, Ma LK (2021) Factors Associated with the Prognosis of  
367 Patients with Acute Myocardial Infarction and Cardiogenic Shock. *Med Sci Monit*  
368 27:e929996.

369 [dataset]4.Koskinas KC, Mach F, Raber L (2021) Lipid-lowering therapy and  
370 percutaneous coronary interventions. *EuroIntervention* 16(17):1389-403.

371 [dataset]5.Kim YH, Her AY, Jeong MH, Kim BK, Shin DH, Kim JS, Ko YG, Choi D,  
372 Hong MK, Jang Y (2019) Two-year outcomes of statin therapy in patients with acute  
373 myocardial infarction with or without dyslipidemia after percutaneous coronary  
374 intervention in the era of new-generation drug-eluting stents within Korean  
375 population: Data from the Korea Acute Myocardial Infarction Registry. *Catheter*  
376 *Cardiovasc Interv* 93(7):1264-75.

377 [dataset]6.Chin KL, Wolfe R, Reid CM, Tonkin A, Hopper I, Brennan A,



- 1  
2  
3  
4 378 Andrianopoulos N, Duffy SJ, Clark D, Ajani A, Liew D, Melbourne Interventional G  
5  
6 379 (2018) Does Statin Benefits Patients with Heart Failure Undergoing Percutaneous  
7  
8  
9 380 Coronary Intervention? Findings from the Melbourne Interventional Group Registry.  
10  
11 381 *Cardiovasc Drugs Ther* 32(1):57-64.  
12  
13  
14 382 [dataset]7.Ray KK, Molemans B, Schoonen WM, Giovas P, Bray S, Kiru G, Murphy  
15  
16  
17 383 J, Banach M, De Servi S, Gaita D, Gouni-Berthold I, Hovingh GK, Jozwiak JJ,  
18  
19 384 Jukema JW, Kiss RG, Kownator S, Iversen HK, Maher V, Masana L, Parkhomenko  
20  
21  
22 385 A, Peeters A, Clifford P, Raslova K, Siostrzonek P, Romeo S, Tousoulis D,  
23  
24 386 Vlachopoulos C, Vrablik M, Catapano AL, Poulter NR (2021) study DVEU-Wide  
25  
26 387 Cross-Sectional Observational Study of Lipid-Modifying Therapy Use in Secondary  
27  
28 388 and Primary Care: the DA VINCI study. *Eur J Prev Cardiol* 28(11):1279-89.  
29  
30  
31 389 [dataset]8.Rea F, Savare L, Corrao G, Mancina G (2021) Adherence to Lipid-  
32  
33 390 Lowering Treatment by Single-Pill Combination of Statin and Ezetimibe. *Adv Ther*  
34  
35 391 38(10):5270-85.  
36  
37  
38 392 [dataset]9.Pandit AK, Kumar P, Kumar A, Chakravarty K, Misra S, Prasad K (2016)  
39  
40 393 High-dose statin therapy and risk of intracerebral hemorrhage: a meta-analysis. *Acta*  
41  
42 394 *Neurol Scand* 134(1):22-8.  
43  
44  
45 395 [dataset]10. Bellosta S, Corsini A (2018) Statin drug interactions and related  
46  
47 396 adverse reactions: an update. *Expert Opin Drug Saf* 17(1):25-37.  
48  
49  
50 397 [dataset]11.Yang X, Lan X, Zhang XL, Han ZL, Yan SM, Wang WX, Xu B, Ge WH  
51  
52 398 (2022) Intensive vs non-intensive statin pretreatment before percutaneous coronary  
53  
54 399 intervention in Chinese patients: A meta-analysis of randomized controlled trials.  
55  
56  
57  
58  
59  
60

- 1  
2  
3  
4 400 World J Clin Cases 10(5):1557-71.  
5  
6  
7 401 [dataset]12.Borovac JA, Leth-Olsen M, Kumric M, D'Amario D, Schwarz K, Glavas  
8  
9 402 D, Bozic J (2022) Efficacy of high-dose atorvastatin or rosuvastatin loading in  
10  
11 403 patients with acute coronary syndrome undergoing percutaneous coronary  
12  
13 404 intervention: a meta-analysis of randomized controlled trials with GRADE  
14  
15 405 qualification of available evidence. Eur J Clin Pharmacol 78(1):111-26.  
16  
17  
18  
19 406 [dataset]13.Vinci P, Panizon E, Tosoni LM, Cerrato C, Pellicori F, Mearelli F,  
20  
21 407 Biasinutto C, Fiotti N, Di Girolamo FG, Biolo G (2021) Statin-Associated Myopathy:  
22  
23 408 Emphasis on Mechanisms and Targeted Therapy. Int J Mol Sci 22(21).  
24  
25  
26  
27 409 [dataset]14.Luo Y, Chaimani A, Furukawa TA, Kataoka Y, Ogawa Y, Cipriani A,  
28  
29 410 Salanti G (2021) Visualizing the evolution of evidence: Cumulative network meta-  
30  
31 411 analyses of new generation antidepressants in the last 40 years. Res Synth Methods  
32  
33 412 12(1):74-85.  
34  
35  
36  
37 413 [dataset]15.Raber L, Ueki Y, Otsuka T, Losdat S, Haner JD, Lonborg J, Fahrni G,  
38  
39 414 Iglesias JF, van Geuns RJ, Ondracek AS, Radu Juul Jensen MD, Zanchin C, Stortecky  
40  
41 415 S, Spirk D, Siontis GCM, Saleh L, Matter CM, Daemen J, Mach F, Heg D,  
42  
43 416 Windecker S, Engstrom T, Lang IM, Koskinas KC, collaborators P-A (2022) Effect  
44  
45 417 of Alirocumab Added to High-Intensity Statin Therapy on Coronary Atherosclerosis  
46  
47 418 in Patients With Acute Myocardial Infarction: The PACMAN-AMI Randomized  
48  
49 419 Clinical Trial. JAMA 327(18):1771-81.  
50  
51  
52  
53 420 [dataset]16.Peterson BE, Bhatt DL, Steg PG, Miller M, Brinton EA, Jacobson TA,  
54  
55 421 Ketchum SB, Juliano RA, Jiao L, Doyle RT, Jr., Granowitz C, Gibson CM, Pinto D,

- 1  
2  
3  
4 422 Giugliano RP, Budoff MJ, Tardif JC, Verma S, Ballantyne CM, Investigators R-I  
5  
6 423 (2022) Treatment With Icosapent Ethyl to Reduce Ischemic Events in Patients With  
7  
8  
9 424 Prior Percutaneous Coronary Intervention: Insights From REDUCE-IT PCI. *J Am*  
10  
11 425 *Heart Assoc* 11(6):e022937.
- 12  
13  
14 426 [dataset]17.Furtado RHM, Fagundes AA, Jr., Oyama K, Zelniker TA, Tang M, Kuder  
15  
16  
17 427 JF, Murphy SA, Hamer A, Wang H, Keech AC, Giugliano RP, Sabatine MS,  
18  
19 428 Bergmark BA (2022) Effect of Evolocumab in Patients With Prior Percutaneous  
20  
21 429 Coronary Intervention. *Circ Cardiovasc Interv* 15(3):e011382.
- 22  
23  
24 430 [dataset]18.Okada T, Miyoshi T, Doi M, Nosaka K, Tsushima R, Ugawa S, Takagi  
25  
26  
27 431 W, Sogo M, Takahashi M, Ito H (2022) Effect of Early Initiation of Evolocumab on  
28  
29 432 Lipoprotein(a) in Patients with Acute Myocardial Infarction: Sub-Analysis of a  
30  
31 433 Randomized Controlled Trial. *J Cardiovasc Dev Dis* 9(5).
- 32  
33  
34 434 [dataset]19.Hao Y, Yang YL, Wang YC, Li J (2022) Effect of the Early Application  
35  
36  
37 435 of Evolocumab on Blood Lipid Profile and Cardiovascular Prognosis in Patients with  
38  
39 436 Extremely High-Risk Acute Coronary Syndrome. *Int Heart J* 63(4):669-77.
- 40  
41  
42 437 [dataset]20.Deng Y, He S, Wang D, Dai C, Xu X, Zhang J (2021) Clinical study of  
43  
44  
45 438 effect of ezetimibe combined with statins on residual lipoprotein cholesterol and  
46  
47  
48 439 MACE events in patients undergoing emergency intervention with acute coronary  
49  
50 440 syndrome. *Chinese Journal of Clinical Pharmacology and Therapeutics* 26(9):1048-  
51  
52  
53 441 52.
- 54  
55  
56 442 [dataset]21.Sun C, Zheng W, Liang L, Liu Z, Sun W, Tang R (2021) Ezetimibe  
57  
58  
59 443 Improves Rosuvastatin Effects on Inflammation and Vascular Endothelial Function in  
60

- 1  
2  
3  
4 444 Acute Coronary Syndrome Patients Undergoing PCI. *J Interv Cardiol* 2021:2995602.  
5  
6 [dataset]22.He W, Cao M, Li Z (2020) Effects of different doses of atorvastatin,  
7  
8  
9 446 rosuvastatin, and simvastatin on elderly patients with ST-elevation acute myocardial  
10  
11 447 infarction (AMI) after percutaneous coronary intervention (PCI). *Drug Dev Res.*  
12  
13 448 2020;81(5):551-6.  
14  
15  
16 [dataset]23.Hibi K, Sonoda S, Kawasaki M, Otsuji Y, Murohara T, Ishii H, Sato K,  
17  
18  
19 450 Koshida R, Ozaki Y, Sata M, Morino Y, Miyamoto T, Amano T, Morita S, Kozuma  
20  
21  
22 451 K, Kimura K, Fujiwara H, Ezetimibe ACSI (2018) Effects of Ezetimibe-Statin  
23  
24 452 Combination Therapy on Coronary Atherosclerosis in Acute Coronary Syndrome.  
25  
26  
27 453 *Circ J* 82(3):757-66.  
28  
29 [dataset]24.Im E, Cho YH, Suh Y, Cho DK, Her AY, Kim YH, Lee K, Kang WC,  
30  
31  
32 454 Yun KH, Yoo SY, Cheong SS, Shin DH, Ahn CM, Kim JS, Kim BK, Ko YG, Choi  
33  
34  
35 456 D, Jang Y, Hong MK (2018) High-intensity Statin Treatments in Clinically Stable  
36  
37 457 Patients on Aspirin Monotherapy 12 Months After Drug-eluting Stent Implantation: A  
38  
39  
40 458 Randomized Study. *Rev Esp Cardiol (Engl Ed)* 71(6):423-31.  
41  
42 [dataset]25.Hagiwara N, Kawada-Watanabe E, Koyanagi R, Arashi H, Yamaguchi J,  
43  
44  
45 460 Nakao K, Tobaru T, Tanaka H, Oka T, Endoh Y, Saito K, Uchida T, Matsui K,  
46  
47  
48 461 Ogawa H (2017) Low-density lipoprotein cholesterol targeting with pitavastatin +  
49  
50  
51 462 ezetimibe for patients with acute coronary syndrome and dyslipidaemia: the HIJ-  
52  
53 463 PROPER study, a prospective, open-label, randomized trial. *Eur Heart J.*  
54  
55  
56 464 2017;38(29):2264-76.  
57  
58 [dataset]26.Guo J, Zhang WZ, Zhao Q, Wo JS, Cai SL (2017) Study on the effect of  
59  
60

- 1  
2  
3  
4 466 different doses of rosuvastatin on ventricular remodeling in patients with acute  
5  
6 467 coronary syndrome after emergency percutaneous coronary intervention. *Eur Rev*  
7  
8  
9 468 *Med Pharmacol Sci* 21(19):4457-63.  
10  
11 469 [dataset]27. Wang YB, Fu XH, Gu XS, Fan WZ, Jiang YF, Hao GZ, Miao Q, Cao J,  
12  
13  
14 470 Fu B, Li Y (2017) Effects of intensive pitavastatin therapy on glucose control in  
15  
16 471 patients with non-ST elevation acute coronary syndrome. *Am J Cardiovasc Dis*  
17  
18 472 7(4):89-96.  
19  
20 473 [dataset]28. Watanabe T, Ando K, Daidoji H, Otaki Y, Sugawara S, Matsui M, Ikeno  
21  
22  
23 474 E, Hirono O, Miyawaki H, Yashiro Y, Nishiyama S, Arimoto T, Takahashi H,  
24  
25  
26 475 Shishido T, Miyashita T, Miyamoto T, Kubota I, investigators Cs (2017) A  
27  
28 476 randomized controlled trial of eicosapentaenoic acid in patients with coronary heart  
29  
30 477 disease on statins. *J Cardiol* 70(6):537-44.  
31  
32 478 [dataset]29. Liu Z, Hao H, Yin C, Chu Y, Li J, Xu D (2017) Therapeutic effects of  
33  
34 479 atorvastatin and ezetimibe compared with double-dose atorvastatin in very elderly  
35  
36 480 patients with acute coronary syndrome. *Oncotarget* 8(25):41582-9.  
37  
38 481 [dataset]30. Nosaka K, Miyoshi T, Iwamoto M, Kajiya M, Okawa K, Tsukuda S,  
39  
40 482 Yokohama F, Sogo M, Nishibe T, Matsuo N, Hirohata S, Ito H, Doi M (2017) Early  
41  
42 483 initiation of eicosapentaenoic acid and statin treatment is associated with better  
43  
44 484 clinical outcomes than statin alone in patients with acute coronary syndromes: 1-year  
45  
46 485 outcomes of a randomized controlled study. *Int J Cardiol* 228:173-9.  
47  
48 486 [dataset]31. Matsushita K, Hibi K, Komura N, Akiyama E, Maejima N, Iwahashi N,  
49  
50 487 Tsukahara K, Kosuge M, Ebina T, Sumita S, Umemura S, Kimura K (2016) Effects of  
51  
52  
53  
54  
55  
56  
57  
58  
59  
60

- 1  
2  
3  
4 488 4 Statins on Regression of Coronary Plaque in Acute Coronary Syndrome. *Circ J*  
5  
6 489 80(7):1634-43.  
7  
8  
9 490 [dataset]32.Cannon CP, Blazing MA, Giugliano RP, McCagg A, White JA, Theroux  
10  
11 491 P, Darius H, Lewis BS, Ophuis TO, Jukema JW, De Ferrari GM, Ruzylo W, De  
12  
13 492 Lucca P, Im K, Bohula EA, Reist C, Wiviott SD, Tershakovec AM, Musliner TA,  
14  
15 493 Braunwald E, Califf RM, Investigators I-I (2015) Ezetimibe Added to Statin Therapy  
16  
17 494 after Acute Coronary Syndromes. *N Engl J Med* 372(25):2387-97.  
18  
19 495 [dataset]33.Tsujita K, Sugiyama S, Sumida H, Shimomura H, Yamashita T,  
20  
21 496 Yamanaga K, Komura N, Sakamoto K, Oka H, Nakao K, Nakamura S, Ishihara M,  
22  
23 497 Matsui K, Sakaino N, Nakamura N, Yamamoto N, Koide S, Matsumura T, Fujimoto  
24  
25 498 K, Tsunoda R, Morikami Y, Matsuyama K, Oshima S, Kaikita K, Hokimoto S,  
26  
27 499 Ogawa H, Investigators P-I (2015) Impact of Dual Lipid-Lowering Strategy With  
28  
29 500 Ezetimibe and Atorvastatin on Coronary Plaque Regression in Patients With  
30  
31 501 Percutaneous Coronary Intervention: The Multicenter Randomized Controlled  
32  
33 502 PRECISE-IVUS Trial. *J Am Coll Cardiol* 66(5):495-507.  
34  
35 503 [dataset]34.Nicholls SJ, Kastelein JJ, Schwartz GG, Bash D, Rosenson RS, Cavender  
36  
37 504 MA, Brennan DM, Koenig W, Jukema JW, Nambi V, Wright RS, Menon V, Lincoff  
38  
39 505 AM, Nissen SE, Investigators V- (2014) Varespladib and cardiovascular events in  
40  
41 506 patients with an acute coronary syndrome: the VISTA-16 randomized clinical trial.  
42  
43 507 *JAMA* 311(3):252-62.  
44  
45 508 [dataset]35.Zhang JR, Wang DQ, Du J, Qu GS, Du JL, Deng SB, Liu YJ, Cai JX, She  
46  
47 509 Q (2015) Efficacy of Clopidogrel and Clinical Outcome When Clopidogrel Is

- 1  
2  
3  
4 510 Coadministered With Atorvastatin and Lansoprazole: A Prospective, Randomized,  
5  
6  
7 511 Controlled Trial. *Medicine (Baltimore)* 94(50):e2262.  
8  
9 512 [dataset]36. Leoncini M, Toso A, Maioli M, Tropeano F, Badia T, Villani S, Bellandi  
10  
11 513 F (2014) Early high-dose rosuvastatin and cardioprotection in the protective effect of  
12  
13 514 rosuvastatin and antiplatelet therapy on contrast-induced acute kidney injury and  
14  
15 515 myocardial damage in patients with acute coronary syndrome (PRATO-ACS) study.  
16  
17 516 *Am Heart J* 168(5):792-7.  
18  
19 517 [dataset]37. Takano H, Mizuma H, Kuwabara Y, Sato Y, Shindo S, Kotooka N,  
20  
21 518 Fujimatsu D, Kobayashi Y, Inoue T, Node K, Komuro I, Investigators PS (2013)  
22  
23 519 Effects of pitavastatin in Japanese patients with chronic heart failure: the Pitavastatin  
24  
25 520 Heart Failure Study (PEARL Study). *Circ J* 77(4):917-25.  
26  
27 521 [dataset]38. Nozue T, Fukui K, Yamamoto S, Kunishima T, Umezawa S, Onishi Y,  
28  
29 522 Tohyama S, Takeyama Y, Morino Y, Yamauchi T, Hibi K, Sozu T, Terashima M,  
30  
31 523 Michishita I, Investigators T (2013) C-reactive protein and future cardiovascular  
32  
33 524 events in statin-treated patients with angina pectoris: the extended TRUTH study. *J*  
34  
35 525 *Atheroscler Thromb* 20(9):717-25.  
36  
37 526 [dataset]39. Lablanche JM, Leone A, Merkely B, Morais J, Alonso J, Santini M, Eha J,  
38  
39 527 Demil N, Licour M, Tardif JC, investigators C (2010) Comparison of the efficacy of  
40  
41 528 rosuvastatin versus atorvastatin in reducing apolipoprotein B/apolipoprotein A-1 ratio  
42  
43 529 in patients with acute coronary syndrome: results of the CENTAURUS study. *Arch*  
44  
45 530 *Cardiovasc Dis* 103(3):160-9.  
46  
47 531 [dataset]40. Gibson CM, Pride YB, Hochberg CP, Sloan S, Sabatine MS, Cannon CP,  
48  
49  
50  
51  
52  
53  
54  
55  
56  
57  
58  
59  
60

- 1  
2  
3  
4 532 Group TS (2009) Effect of intensive statin therapy on clinical outcomes among  
5  
6  
7 533 patients undergoing percutaneous coronary intervention for acute coronary syndrome.  
8  
9 534 PCI-PROVE IT: A PROVE IT-TIMI 22 (Pravastatin or Atorvastatin Evaluation and  
10  
11  
12 535 Infection Therapy-Thrombolysis In Myocardial Infarction 22) Substudy. J Am Coll  
13  
14 536 Cardiol 54(24):2290-5.
- 15  
16  
17 537 [dataset]41.Han YL, Zhang ZL, Li Y, Wang SL, Jing QM, Wang ZL, Wang DM  
18  
19 538 (2009) Comparison on long-term effects of atorvastatin or pravastatin combined with  
20  
21  
22 539 clopidogrel for patients undergoing coronary stenting: a randomized controlled trial.  
23  
24 540 Zhonghua Yi Xue Za Zhi 89(32):2240-4.
- 25  
26  
27 541 [dataset]42.Hiro T, Kimura T, Morimoto T, Miyauchi K, Nakagawa Y, Yamagishi M,  
28  
29 542 Ozaki Y, Kimura K, Saito S, Yamaguchi T, Daida H, Matsuzaki M, Investigators J-A  
30  
31  
32 543 (2009) Effect of intensive statin therapy on regression of coronary atherosclerosis in  
33  
34 544 patients with acute coronary syndrome: a multicenter randomized trial evaluated by  
35  
36  
37 545 volumetric intravascular ultrasound using pitavastatin versus atorvastatin (JAPAN-  
38  
39 546 ACS [Japan assessment of pitavastatin and atorvastatin in acute coronary syndrome]  
40  
41  
42 547 study). J Am Coll Cardiol 54(4):293-302.
- 43  
44  
45 548 [dataset]43.Dohi T, Miyauchi K, Okazaki S, Yokoyama T, Yanagisawa N, Tamura H,  
46  
47  
48 549 Kojima T, Yokoyama K, Kurata T, Daida H (2009) Early intensive statin treatment  
49  
50  
51 550 for six months improves long-term clinical outcomes in patients with acute coronary  
52  
53  
54 551 syndrome (Extended-ESTABLISH trial): a follow-up study. Atherosclerosis  
55  
56 552 210(2):497-502.
- 57  
58  
59 553 [dataset]44.Toi T, Taguchi I, Yoneda S, Kageyama M, Kikuchi A, Tokura M, Kanaya  
60



- 1  
2  
3  
4 554 T, Abe S, Matsuda R, Kaneko N (2009) Early effect of lipid-lowering therapy with  
5  
6 555 pitavastatin on regression of coronary atherosclerotic plaque. Comparison with  
7  
8  
9 556 atorvastatin. *Circ J* 73(8):1466-72.  
10  
11  
12 557 [dataset]45. Xu K, Han YL, Jing QM, Wang SL, Ma YY, Luan B, Wang ZL, Wang  
13  
14 558 DM (2007) Lipid-modifying therapy in diabetic patients with high plasma non-high-  
15  
16  
17 559 density lipoprotein cholesterol after percutaneous coronary intervention. *Exp Clin*  
18  
19 560 *Cardiol* 12(1):48-50.  
20  
21  
22 561 [dataset]46. Bae JH, Bassenge E, Kim KY, Synn YC, Park KR, Schwemmer M (2004)  
23  
24 562 Effects of low-dose atorvastatin on vascular responses in patients undergoing  
25  
26  
27 563 percutaneous coronary intervention with stenting. *J Cardiovasc Pharmacol Ther*  
28  
29 564 9(3):185-92.  
30  
31  
32 565 [dataset]47. Serruys PW, de Feyter P, Macaya C, Kokott N, Puel J, Vrolix M, Branzi  
33  
34 566 A, Bertolami MC, Jackson G, Strauss B, Meier B, Lescol Intervention Prevention  
35  
36  
37 567 Study I (2002) Fluvastatin for prevention of cardiac events following successful first  
38  
39 568 percutaneous coronary intervention: a randomized controlled trial. *JAMA*  
40  
41 569 287(24):3215-22.  
42  
43  
44 570 [dataset]48. Mulder HJ, Bal ET, Jukema JW, Zwinderman AH, Schalij MJ, van Boven  
45  
46  
47 571 AJ, Bruschke AV (2000) Pravastatin reduces restenosis two years after percutaneous  
48  
49 572 transluminal coronary angioplasty (REGRESS trial). *Am J Cardiol* 86(7):742-6.  
50  
51  
52 573 [dataset]49. Flaker GC, Warnica JW, Sacks FM, Moye LA, Davis BR, Rouleau JL,  
53  
54 574 Webel RR, Pfeffer MA, Braunwald E (1999) Pravastatin prevents clinical events in  
55  
56  
57 575 revascularized patients with average cholesterol concentrations. *Cholesterol and*  
58  
59  
60

- 1  
2  
3  
4 576 Recurrent Events CARE Investigators. *J Am Coll Cardiol* 34(1):106-12.  
5  
6  
7 577 [dataset]50.Bertrand ME, McFadden EP, Fruchart JC, Van Belle E, Commeau P,  
8  
9 578 Grollier G, Bassand JP, Machecourt J, Cassagnes J, Mossard JM, Vacheron A,  
10  
11 579 Castaigne A, Danchin N, Lablanche JM (1997) Effect of pravastatin on angiographic  
12  
13  
14 580 restenosis after coronary balloon angioplasty. The PREDICT Trial Investigators.  
15  
16  
17 581 Prevention of Restenosis by Elisor after Transluminal Coronary Angioplasty. *J Am*  
18  
19 582 *Coll Cardiol* 30(4):863-9.  
20  
21  
22 583 [dataset]51.O'Keefe JH, Jr., Stone GW, McCallister BD, Jr., Maddex C, Ligon R,  
23  
24 584 Kacich RL, Kahn J, Caverio PG, Hartzler GO, McCallister BD (1996) Lovastatin plus  
25  
26  
27 585 probucol for prevention of restenosis after percutaneous transluminal coronary  
28  
29  
30 586 angioplasty. *Am J Cardiol* 77(8):649-52.  
31  
32  
33 587 [dataset]52.Onaka H, Hirota Y, Kita Y, Tsuji R, Ishii K, Ishimura T, Kawamura K  
34  
35 588 (1994) The effect of pravastatin on prevention of restenosis after successful  
36  
37  
38 589 percutaneous transluminal coronary angioplasty. *Jpn Circ J* 58(2):100-6.  
39  
40  
41 590 [dataset]53.Sahni R, Maniet AR, Voci G, Banka VS (1991) Prevention of restenosis  
42  
43 591 by lovastatin after successful coronary angioplasty. *Am Heart J* 121(6 Pt 1):1600-8.  
44  
45  
46 592 [dataset]54.Kita Y, Watanabe M, Kamon D, Ueda T, Soeda T, Okayama S, Ishigami  
47  
48 593 K, Kawata H, Horii M, Inoue F, Doi N, Okura H, Uemura S, Saito Y (2020) Effects  
49  
50  
51 594 of Fatty Acid Therapy in Addition to Strong Statin on Coronary Plaques in Acute  
52  
53  
54 595 Coronary Syndrome: An Optical Coherence Tomography Study. *J Am Heart Assoc*  
55  
56 596 9(16):e015593.  
57  
58  
59 597 [dataset]55.Zhang BH, Yin F, Qiao YN, Guo SD (2022) Triglyceride and  
60

- 1  
2  
3  
4 598 Triglyceride-Rich Lipoproteins in Atherosclerosis. *Front Mol Biosci* 9:909151.  
5  
6 [dataset]56. Bhatt DL, Steg PG, Miller M, Brinton EA, Jacobson TA, Ketchum SB,  
7  
8  
9 600 Doyle RT, Jr., Juliano RA, Jiao L, Granowitz C, Tardif JC, Ballantyne CM,  
10  
11 601 Investigators R-I (2019) Cardiovascular Risk Reduction with Icosapent Ethyl for  
12  
13 602 Hypertriglyceridemia. *N Engl J Med* 380(1):11-22.  
14  
15  
16  
17 603 [dataset]57.Strilchuk L, Tocci G, Fogacci F, Cicero AFG (2020) An overview of  
18  
19 604 rosuvastatin/ezetimibe association for the treatment of hypercholesterolemia and  
20  
21 605 mixed dyslipidemia. *Expert Opin Pharmacother* 21(5):531-9.  
22  
23  
24  
25 606 [dataset]58.Mach F, Baigent C, Catapano AL, Koskinas KC, Casula M, Badimon L,  
26  
27 607 Chapman MJ, De Backer GG, Delgado V, Ference BA, Graham IM, Halliday A,  
28  
29 608 Landmesser U, Mihaylova B, Pedersen TR, Riccardi G, Richter DJ, Sabatine MS,  
30  
31 609 Taskinen MR, Tokgozoglul, Wiklund O, Group ESCSD (2019) 2019 ESC/EAS  
32  
33 610 Guidelines for the management of dyslipidaemias: lipid modification to reduce  
34  
35 611 cardiovascular risk. *Eur Heart J* 41(1):111-88.  
36  
37  
38  
39 612 [dataset]59.Ray KK, Del Prato S, Muller-Wieland D, Cariou B, Colhoun HM,  
40  
41 613 Tinahones FJ, Domenger C, Letierce A, Mandel J, Samuel R, Bujas-Bobanovic M,  
42  
43 614 Leiter LA (2019) Alirocumab therapy in individuals with type 2 diabetes mellitus and  
44  
45 615 atherosclerotic cardiovascular disease: analysis of the ODYSSEY DM-  
46  
47 616 DYSLIPIDEMIA and DM-INSULIN studies. *Cardiovasc Diabetol* 18(1):149.  
48  
49  
50  
51 617 [dataset]60.Lin Y, Parco C, Karathanos A, Krieger T, Schulze V, Chernyak N, Icks A,  
52  
53 618 Kelm M, Brockmeyer M, Wolff G (2022) Clinical efficacy and safety outcomes of  
54  
55 619 bempedoic acid for LDL-C lowering therapy in patients at high cardiovascular risk: a  
56  
57  
58  
59  
60

- 1  
2  
3  
4 620 systematic review and meta-analysis. *BMJ Open* 12(2):e048893.
- 5  
6  
7 621 [dataset]61. Wang X, Wen D, Chen Y, Ma L, You C (2022) PCSK9 inhibitors for  
8  
9 622 secondary prevention in patients with cardiovascular diseases: a bayesian network  
10  
11 623 meta-analysis. *Cardiovasc Diabetol* 21(1):107.
- 12  
13  
14 624 [dataset]62. Schmidt AF, Carter JL, Pearce LS, Wilkins JT, Overington JP, Hingorani  
15  
16 625 AD, Casas JP (2020) PCSK9 monoclonal antibodies for the primary and secondary  
17  
18 626 prevention of cardiovascular disease. *Cochrane Database Syst Rev* 10:CD011748.
- 19  
20  
21 627 [dataset]63. An SJ, Kim TJ, Yoon BW (2017) Epidemiology, Risk Factors, and  
22  
23 628 Clinical Features of Intracerebral Hemorrhage: An Update. *J Stroke* 19(1):3-10.
- 24  
25  
26 629 [dataset]64. Pasta A, Cremonini AL, Pisciotta L, Buscaglia A, Porto I, Barra F, Ferrero  
27  
28 630 S, Brunelli C, Rosa GM (2020) PCSK9 inhibitors for treating hypercholesterolemia.  
29  
30 631 *Expert Opin Pharmacother* 21(3):353-63.
- 31  
32  
33 632 [dataset]65. Sanz-Cuesta, B.E. and J.L. Saver, Lipid-Lowering Therapy and  
34  
35 633 Hemorrhagic Stroke Risk: Comparative Meta-Analysis of Statins and PCSK9  
36  
37 634 Inhibitors. *Stroke*, 2021. 52(10): p. 3142-3150.
- 38  
39  
40 635 [dataset]66. Oesterle A, Laufs U, Liao JK (2017) Pleiotropic Effects of Statins on the  
41  
42 636 Cardiovascular System. *Circ Res* 120(1):229-43.
- 43  
44  
45 637 [dataset]67. Yang T, Fu X, Fu P, Chen J, Xu C, Liu X, Niu T (2021) The value of  
46  
47 638 fragmented QRS in predicting the prognosis of chronic total occlusion patients with  
48  
49 639 myocardial infarction history undergoing percutaneous coronary intervention: A 24-  
50  
51 640 months follow-up study. *Clin Cardiol* 44(4):537-46.
- 52  
53  
54 641 [dataset]68. Ndrepepa G, Holdenrieder S, Cassese S, Xhepa E, Fusaro M, Kastrati A  
55  
56  
57  
58  
59  
60

- 1  
2  
3  
4 642 (2020) Hypocholesterolaemia and mortality in patients with coronary artery disease.  
5  
6 643 Eur J Clin Invest 50(2):e13194.  
7  
8  
9 644 [dataset]69.Sia CH, Zheng H, Ho AF, Bulluck H, Chong J, Foo D, Foo LL, Lim PZY,  
10  
11 645 Liew BW, Tan HC, Yeo TC, Chua TSJ, Chan MY, Hausenloy DJ (2020) The Lipid  
12  
13 646 Paradox is present in ST-elevation but not in non-ST-elevation myocardial infarction  
14  
15 647 patients: Insights from the Singapore Myocardial Infarction Registry. Sci Rep  
16  
17 648 10(1):6799.  
18  
19  
20 649 [dataset]70.Sun H, Li Z, Song X, Liu H, Li Y, Hao Y, Teng T, Liu J, Liu J, Zhao D,  
21  
22 650 Zhou X, Yang Q, Investigators C-A (2021) Revisiting the lipid paradox in ST-  
23  
24 651 elevation myocardial infarction in the Chinese population: findings from the CCC-  
25  
26 652 ACS project. Eur Heart J Acute Cardiovasc Care 10(9):978-87.  
27  
28  
29 653 [dataset]71.Guedeney P, Claessen BE, Kalkman DN, Aquino M, Sorrentino S,  
30  
31 654 Giustino G, Farhan S, Vogel B, Sartori S, Montalescot G, Sweeny J, Kovacic JC,  
32  
33 655 Krishnan P, Barman N, Dangas G, Kini A, Baber U, Sharma S, Mehran R (2019)  
34  
35 656 Residual Inflammatory Risk in Patients With Low LDL Cholesterol Levels  
36  
37 657 Undergoing Percutaneous Coronary Intervention. J Am Coll Cardiol 73(19):2401-9.  
38  
39 658 [dataset]72.Razzouk L, Muntner P, Bansilal S, Kini AS, Aneja A, Mozes J, Ivan O,  
40  
41 659 Jakkula M, Sharma S, Farkouh ME (2009) C-reactive protein predicts long-term  
42  
43 660 mortality independently of low-density lipoprotein cholesterol in patients undergoing  
44  
45 661 percutaneous coronary intervention. Am Heart J 158(2):277-83.  
46  
47  
48 662 [dataset]73.Abbate A, Biondi-Zoccai GG, Appleton DL, Erne P, Schoenenberger  
49  
50 663 AW, Lipinski MJ, Agostoni P, Sheiban I, Vetrovec GW (2008) Survival and cardiac  
51  
52  
53  
54  
55  
56  
57  
58  
59  
60

1  
2  
3  
4 664 remodeling benefits in patients undergoing late percutaneous coronary intervention of  
5  
6 665 the infarct-related artery: evidence from a meta-analysis of randomized controlled  
7  
8  
9 666 trials. *J Am Coll Cardiol* 51(9):956-64.

10  
11  
12 667

13  
14 668 **Figure 1.** Flowchart of the study selection process for eligible studies

15  
16  
17 669 **Figure 2.** Methodological quality assessment of included studies

18  
19 670 **Figure 3.** Network plots of comparisons for major outcomes included in the analyses.

20  
21  
22 671 A: dichotomous results of MACE based on specific types of statins; B: dichotomous  
23  
24 672 results of MACE based on taking statins as a whole; C: hazard ratio results of MACE  
25  
26 673 based on specific types of statins; D: hazard ratio results of MACE based on taking  
27  
28 674 statins as a whole; E: dichotomous results of mortality based on specific types of  
29  
30 675 statins; F: dichotomous results of mortality based on taking statins as a whole.

31  
32  
33 676 **Figure 4.** Forest plots of lipid-lowering therapy compare to control for outcomes in  
34  
35 677 network meta-analysis with SUCRA ranking results. A: dichotomous results of  
36  
37 678 MACE based on specific types of statins; B: dichotomous results of MACE based on  
38  
39 679 taking statins as a whole; C: hazard ratio results of MACE based on specific types of  
40  
41 680 statins; D: hazard ratio results of MACE based on taking statins as a whole; E:  
42  
43 681 dichotomous results of mortality based on specific types of statins; F: dichotomous  
44  
45 682 results of mortality based on taking statins as a whole.

46  
47  
48 683 **Figure 5.** The comparison-adjusted funnel plot for assessing all main outcomes. A:  
49  
50 684 dichotomous results of MACE based on specific types of statins; B: dichotomous  
51  
52 685 results of MACE based on taking statins as a whole; C: dichotomous results of

1  
2  
3  
4 686 mortality based on specific types of statins; D: dichotomous results of mortality based  
5  
6 687 on taking statins as a whole.

7  
8 688  
9 689  
10 690  
11 691  
12 692  
13 693  
14 694  
15 695  
16 696  
17 697  
18 698  
19 699  
20 700

21  
22  
23  
24  
25  
26 701 **Authors and Afliations**

27  
28 702 Chang-Jiang Deng, Ju Yan, Ying-Ying Zheng, Ting-Ting Wu, Ying Pan, Xian-Geng

29  
30 703 Hou, Si-Fan Wang, Subinur·Sirajidin, Mikereyi·Sirajidin, Xiang Xie

31  
32  
33 704 Chang-Jiang Deng Xian-Geng Hou

34  
35 705 1187229853@qq.com 380138554@qq.com

36  
37 706 Ju Yan Si-Fan Wang

38  
39 707 yyjj2017@163.com 562654119@qq.com

40  
41 708 Ying-Ying Zheng Subinur·Sirajidin

42  
43 709 zhengying527@163.com 496568064@qq.com

44  
45 710 Ting-TingWu Mikereyi·Aimaitijiang

46  
47 711 1255723526@qq.com 3195676352@qq.com

48  
49 712 Ying Pan Xiang Xie

50  
51 713 2475854195@qq.com xiangxie999@sina.com

52  
53 714 Department of Cardiology, The First Affiliated Hospital of Xinjiang Medical

54  
55 715 University, Urumqi, 830011, P.R. China.

56  
57 716  
58  
59  
60

1  
2  
3  
4  
5  
6  
7  
8  
9  
10  
11  
12  
13  
14  
15  
16  
17  
18  
19  
20  
21  
22  
23  
24  
25  
26  
27  
28  
29  
30  
31  
32  
33  
34  
35  
36  
37  
38  
39  
40  
41  
42  
43  
44  
45  
46  
47  
48  
49  
50  
51  
52  
53  
54  
55  
56  
57  
58  
59  
60

# PRISMA 2020 flow diagram for new systematic reviews which included searches of databases and registers only

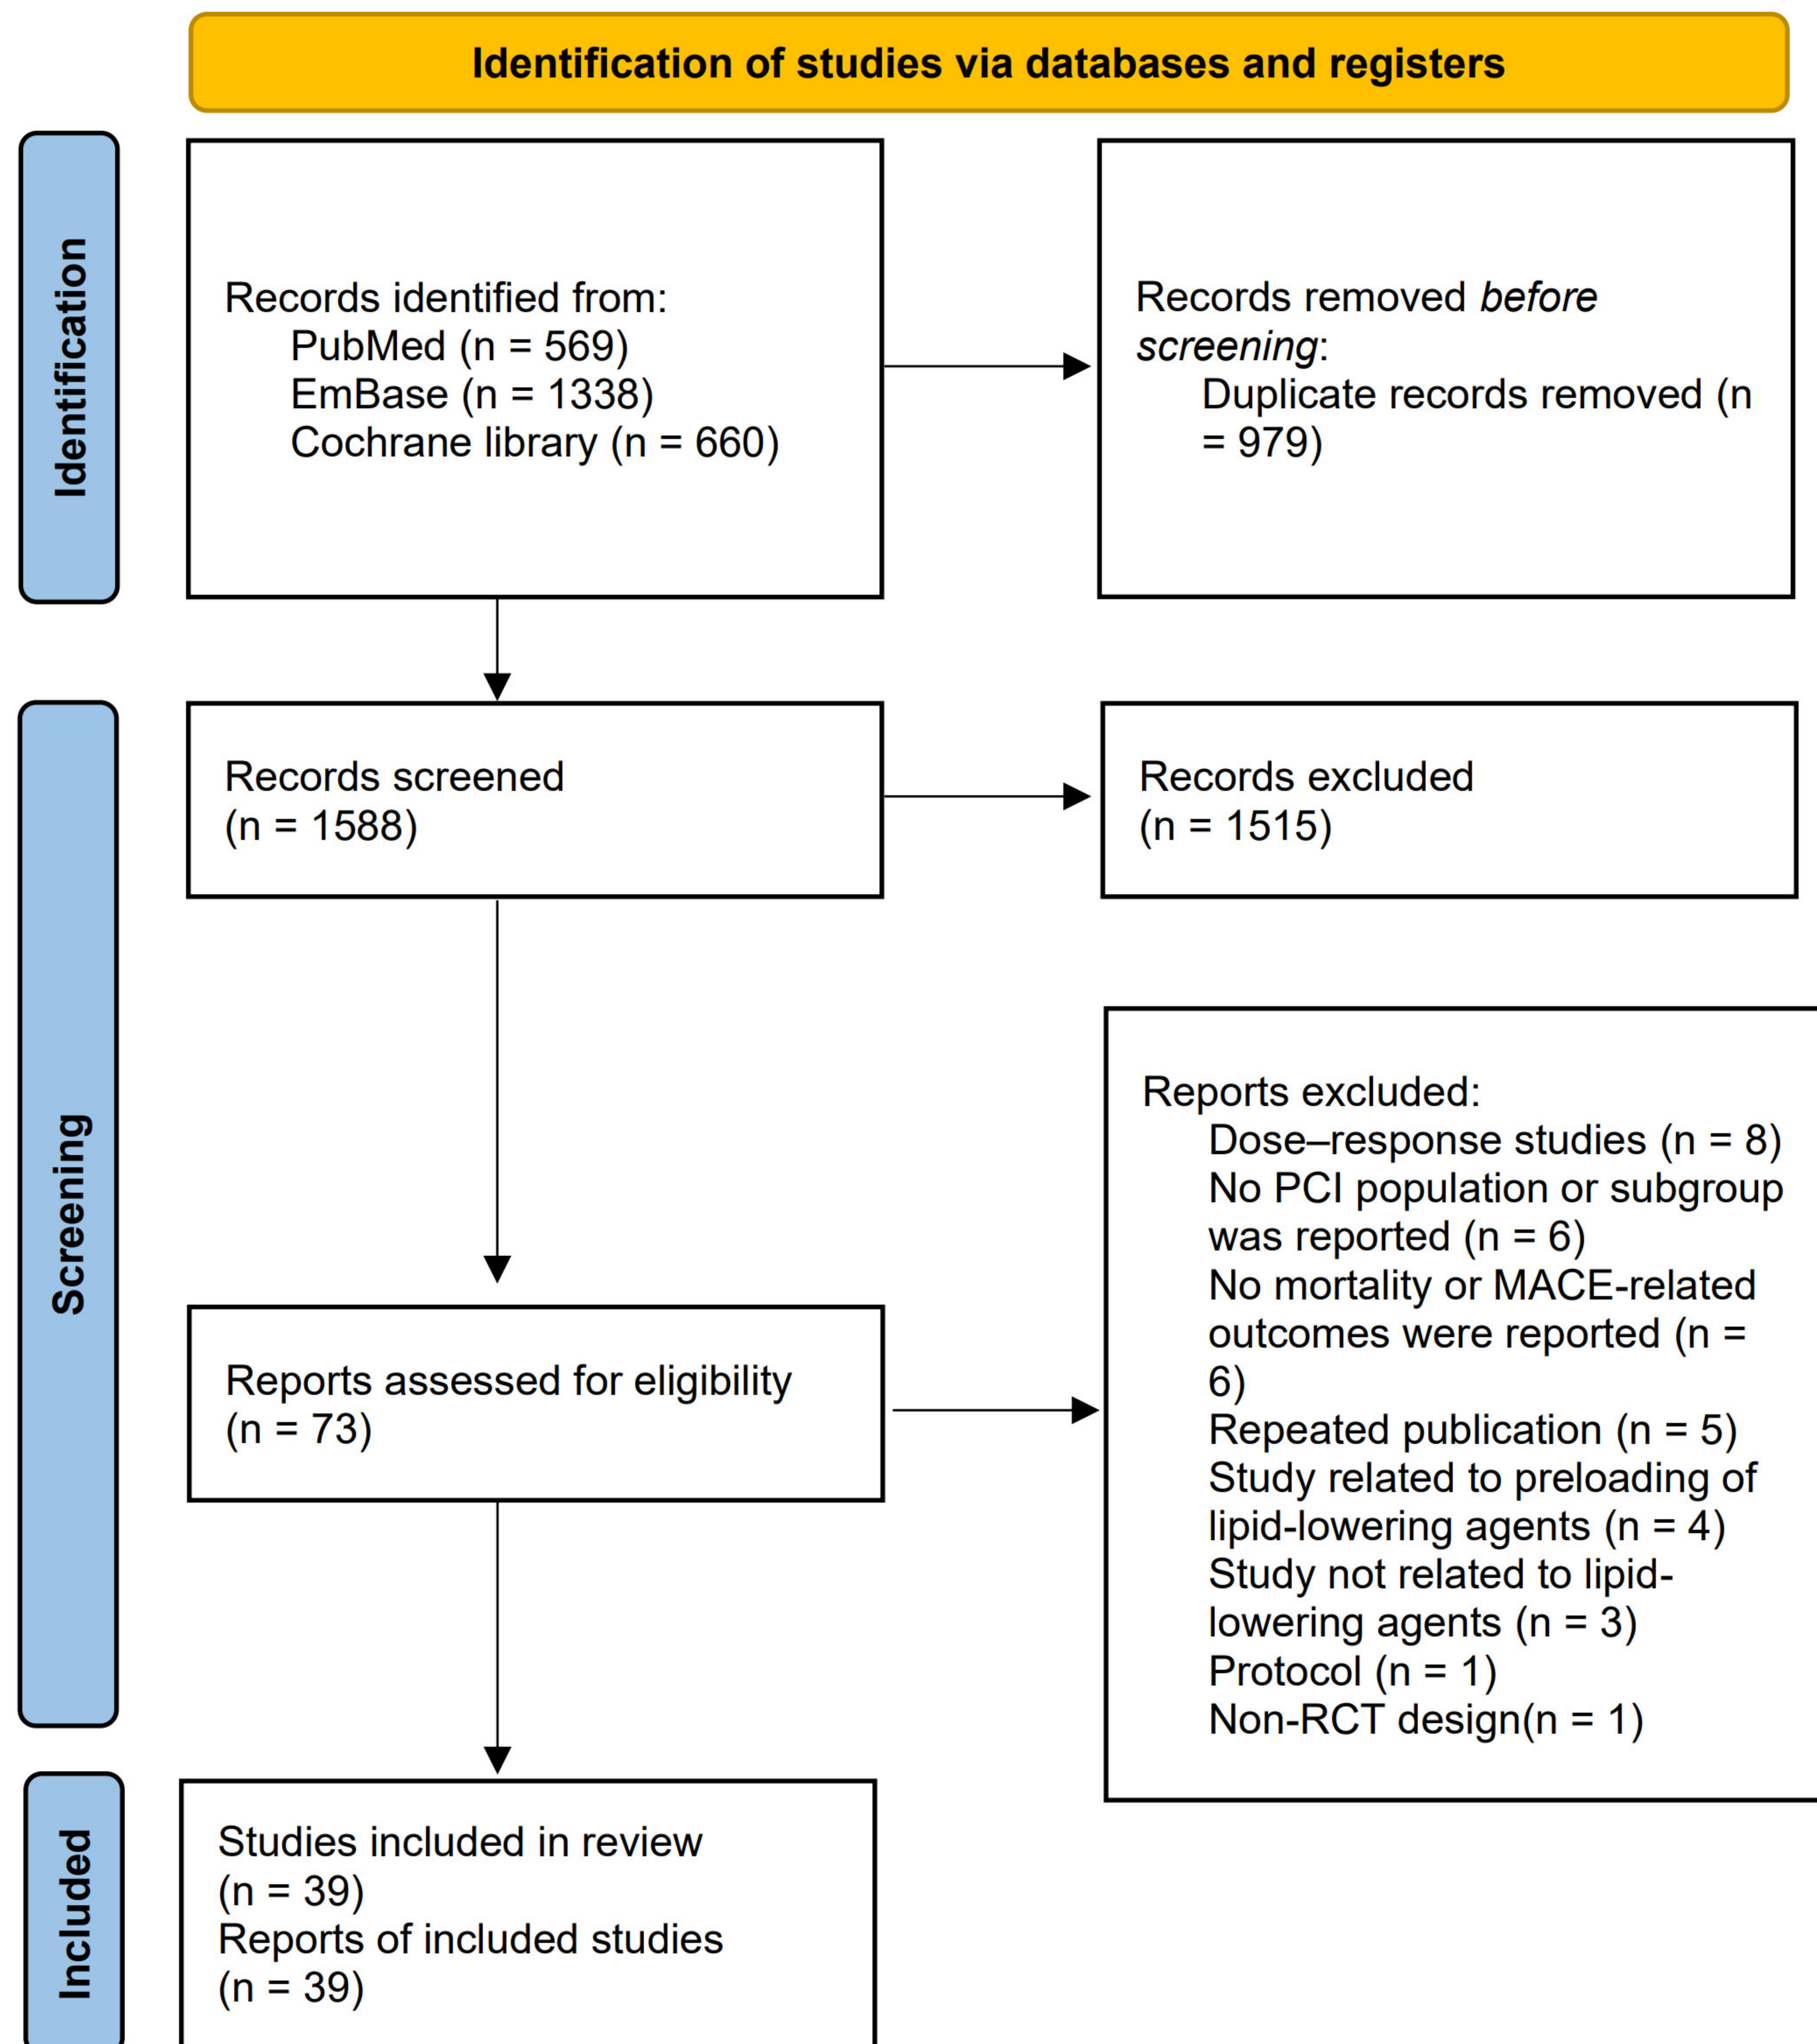

\*Consider, if feasible to do so, reporting the number of records identified from each database or register searched (rather than the total number across all databases/registers).

\*\*If automation tools were used, indicate how many records were excluded by a human and how many were excluded by automation tools.

From: Page MJ, McKenzie JE, Bossuyt PM, Boutron I, Hoffmann TC, Mulrow CD, et al. The PRISMA 2020 statement: an updated guideline for reporting systematic reviews. *BMJ* 2021;372:n71. doi: 10.1136/bmj.n71

For more information, visit: <http://www.prisma-statement.org/>



1  
2  
3  
4  
5  
6  
7  
8  
9  
10  
11  
12  
13  
14  
15  
16  
17  
18  
19  
20  
21  
22  
23  
24  
25  
26  
27  
28  
29  
30  
31  
32  
33  
34  
35  
36  
37  
38  
39  
40  
41  
42  
43  
44  
45  
46  
47  
48  
49  
50  
51  
52  
53  
54  
55  
56  
57  
58  
59  
60

|                            | Random sequence generation (selection bias) | Allocation concealment (selection bias) | Blinding of participants and personnel (performance bias) | Blinding of outcome assessment (detection bias) | Incomplete outcome data (attrition bias) | Selective reporting (reporting bias) | Other bias |
|----------------------------|---------------------------------------------|-----------------------------------------|-----------------------------------------------------------|-------------------------------------------------|------------------------------------------|--------------------------------------|------------|
| Bae JH 2004                | ?                                           | ?                                       | -                                                         | -                                               | +                                        | ?                                    | +          |
| C. Michael Gibson 2009     | +                                           | +                                       | +                                                         | +                                               | +                                        | +                                    | +          |
| Christopher P Cannon 2015  | +                                           | +                                       | +                                                         | +                                               | +                                        | +                                    | +          |
| Deng YF 2021               | ?                                           | ?                                       | -                                                         | -                                               | +                                        | +                                    | +          |
| Eui Im 2017                | +                                           | +                                       | -                                                         | +                                               | +                                        | +                                    | +          |
| Greg C. Flaker 1999        | +                                           | +                                       | +                                                         | +                                               | +                                        | +                                    | +          |
| Hagiwara N 2017            | +                                           | ?                                       | -                                                         | +                                               | +                                        | +                                    | +          |
| Han J.G.H. Mulder 2000     | +                                           | +                                       | +                                                         | +                                               | +                                        | +                                    | +          |
| Han Yaling 2009            | +                                           | +                                       | -                                                         | -                                               | +                                        | +                                    | +          |
| Haruhiko Onaka 1994        | ?                                           | ?                                       | -                                                         | -                                               | +                                        | +                                    | +          |
| Hiroyuki Takano 2013       | +                                           | +                                       | -                                                         | +                                               | +                                        | +                                    | +          |
| Jean-Marc Lablanche 2010   | +                                           | +                                       | +                                                         | +                                               | +                                        | +                                    | +          |
| J Guo 2017                 | +                                           | +                                       | -                                                         | -                                               | +                                        | ?                                    | +          |
| J H O'Keefe Jr 1996        | +                                           | +                                       | +                                                         | +                                               | +                                        | +                                    | +          |
| Kazumasa Nosaka 2016       | +                                           | ?                                       | -                                                         | +                                               | +                                        | +                                    | +          |
| Kenichi Tsujita 2015       | +                                           | +                                       | -                                                         | +                                               | +                                        | +                                    | +          |
| Kensuke Matsushita 2016    | ?                                           | ?                                       | -                                                         | -                                               | +                                        | +                                    | +          |
| Kiyoshi Hibi 2018          | +                                           | +                                       | -                                                         | +                                               | +                                        | +                                    | +          |
| Lorenz Räber 2022          | +                                           | +                                       | +                                                         | +                                               | +                                        | +                                    | +          |
| Mario Leoncin 2014         | +                                           | ?                                       | -                                                         | -                                               | +                                        | +                                    | +          |
| MICHEL E. BERTRAND 1997    | +                                           | +                                       | +                                                         | +                                               | +                                        | +                                    | +          |
| Patrick W J C Serruys 2002 | +                                           | +                                       | +                                                         | +                                               | +                                        | +                                    | +          |
| Peterson, B. E. 2022       | +                                           | +                                       | +                                                         | +                                               | +                                        | +                                    | +          |
| Rakesh Sahni 1991          | ?                                           | ?                                       | -                                                         | -                                               | +                                        | +                                    | +          |
| Remo H.M. Furtado 2022     | +                                           | +                                       | ?                                                         | +                                               | +                                        | +                                    | +          |
| Stephen J. Nicholls 2015   | +                                           | +                                       | +                                                         | +                                               | +                                        | +                                    | +          |
| Sun C 2021                 | +                                           | ?                                       | -                                                         | -                                               | +                                        | ?                                    | +          |
| Takafumi Hiro 2009         | +                                           | +                                       | -                                                         | +                                               | +                                        | +                                    | +          |
| Tomoaki Okada 2022         | +                                           | +                                       | +                                                         | ?                                               | +                                        | +                                    | +          |
| Tomotaka Dohi 2009         | +                                           | ?                                       | -                                                         | -                                               | +                                        | +                                    | +          |
| Toru Toi 2009              | ?                                           | +                                       | -                                                         | ?                                               | +                                        | ?                                    | +          |
| Tsuyoshi Nozue 2013        | +                                           | +                                       | -                                                         | -                                               | +                                        | ?                                    | +          |
| Wang YB 2017               | +                                           | ?                                       | -                                                         | -                                               | +                                        | +                                    | +          |
| Watanabe T 2017            | +                                           | ?                                       | -                                                         | -                                               | +                                        | +                                    | +          |
| Weifeng He 2020            | +                                           | +                                       | ?                                                         | ?                                               | +                                        | +                                    | +          |
| Xu Kai 2007                | ?                                           | ?                                       | -                                                         | -                                               | +                                        | +                                    | +          |
| Yan Hao 2022               | ?                                           | ?                                       | -                                                         | -                                               | +                                        | +                                    | +          |
| Zhang JR 2015              | +                                           | ?                                       | -                                                         | -                                               | +                                        | ?                                    | +          |
| Zhi Liu 2017               | +                                           | ?                                       | -                                                         | -                                               | +                                        | +                                    | ?          |

1  
2  
3  
4  
5  
6  
7  
8  
9  
10  
11  
12  
13  
14  
15  
16  
17  
18  
19  
20  
21  
22  
23  
24  
25  
26  
27  
28  
29  
30  
31  
32  
33  
34  
35  
36  
37  
38  
39  
40  
41  
42  
43  
44  
45  
46  
47  
48  
49  
50  
51  
52  
53  
54  
55  
56  
57  
58  
59  
60

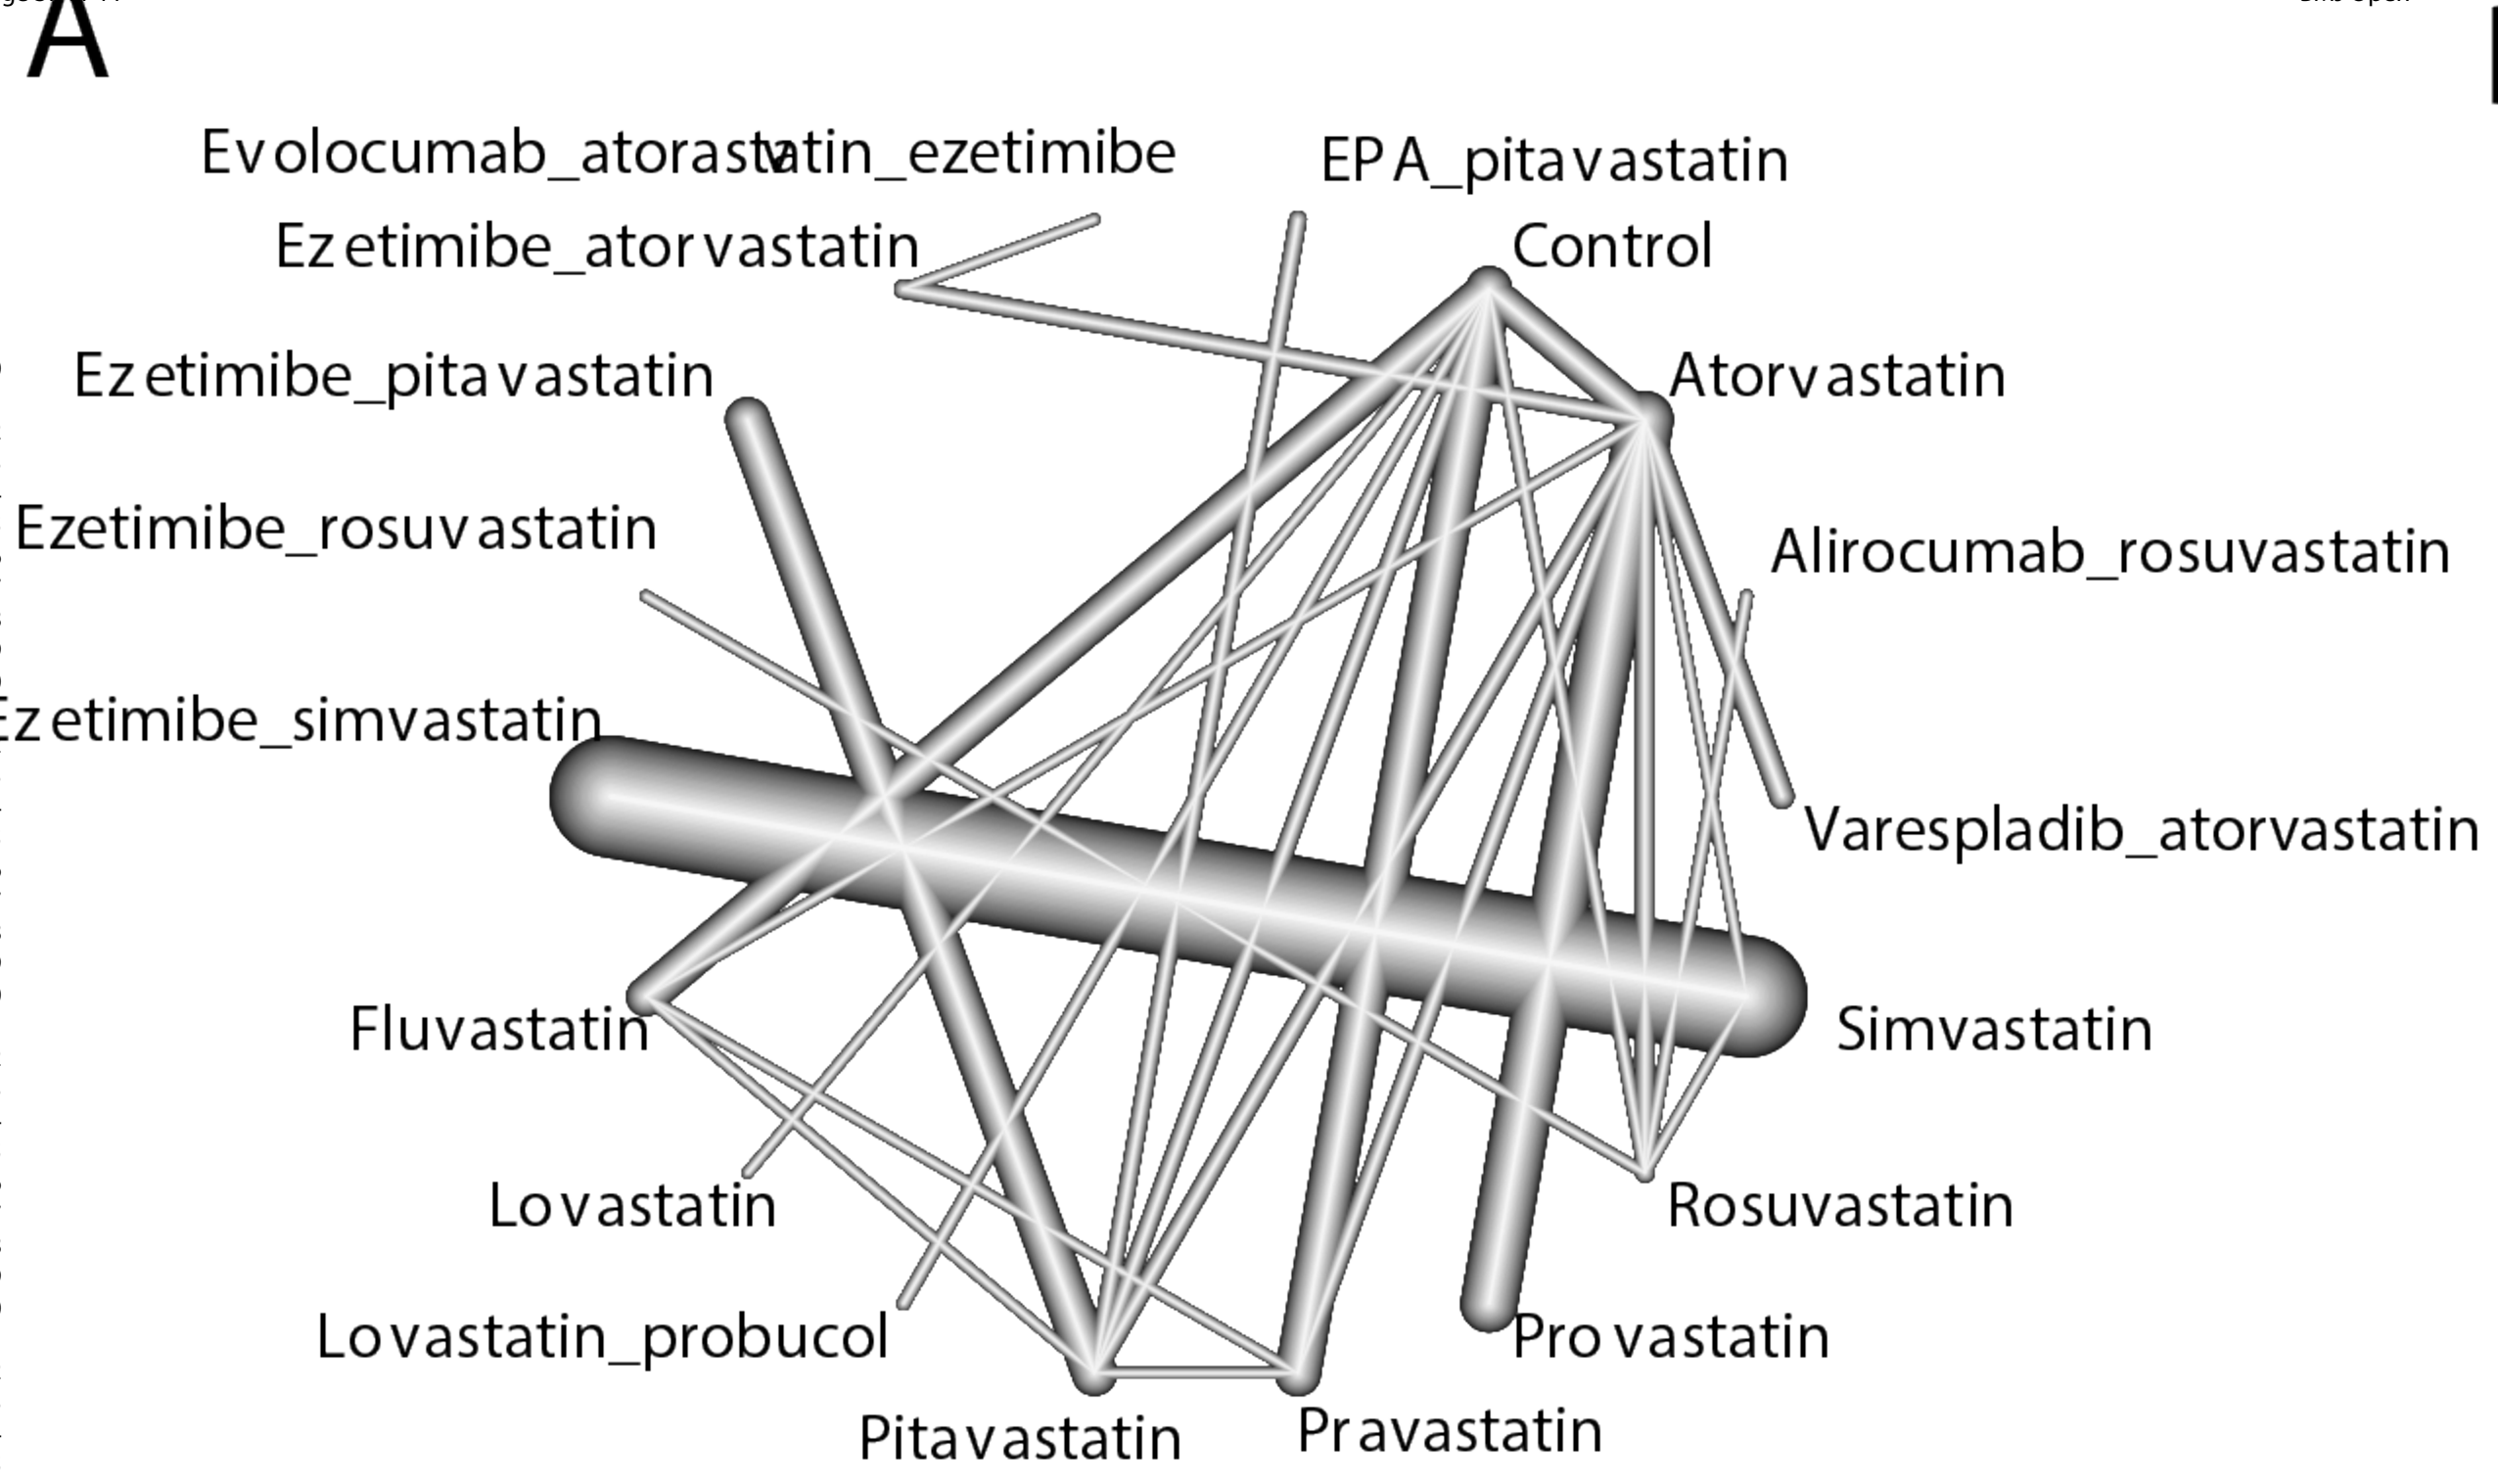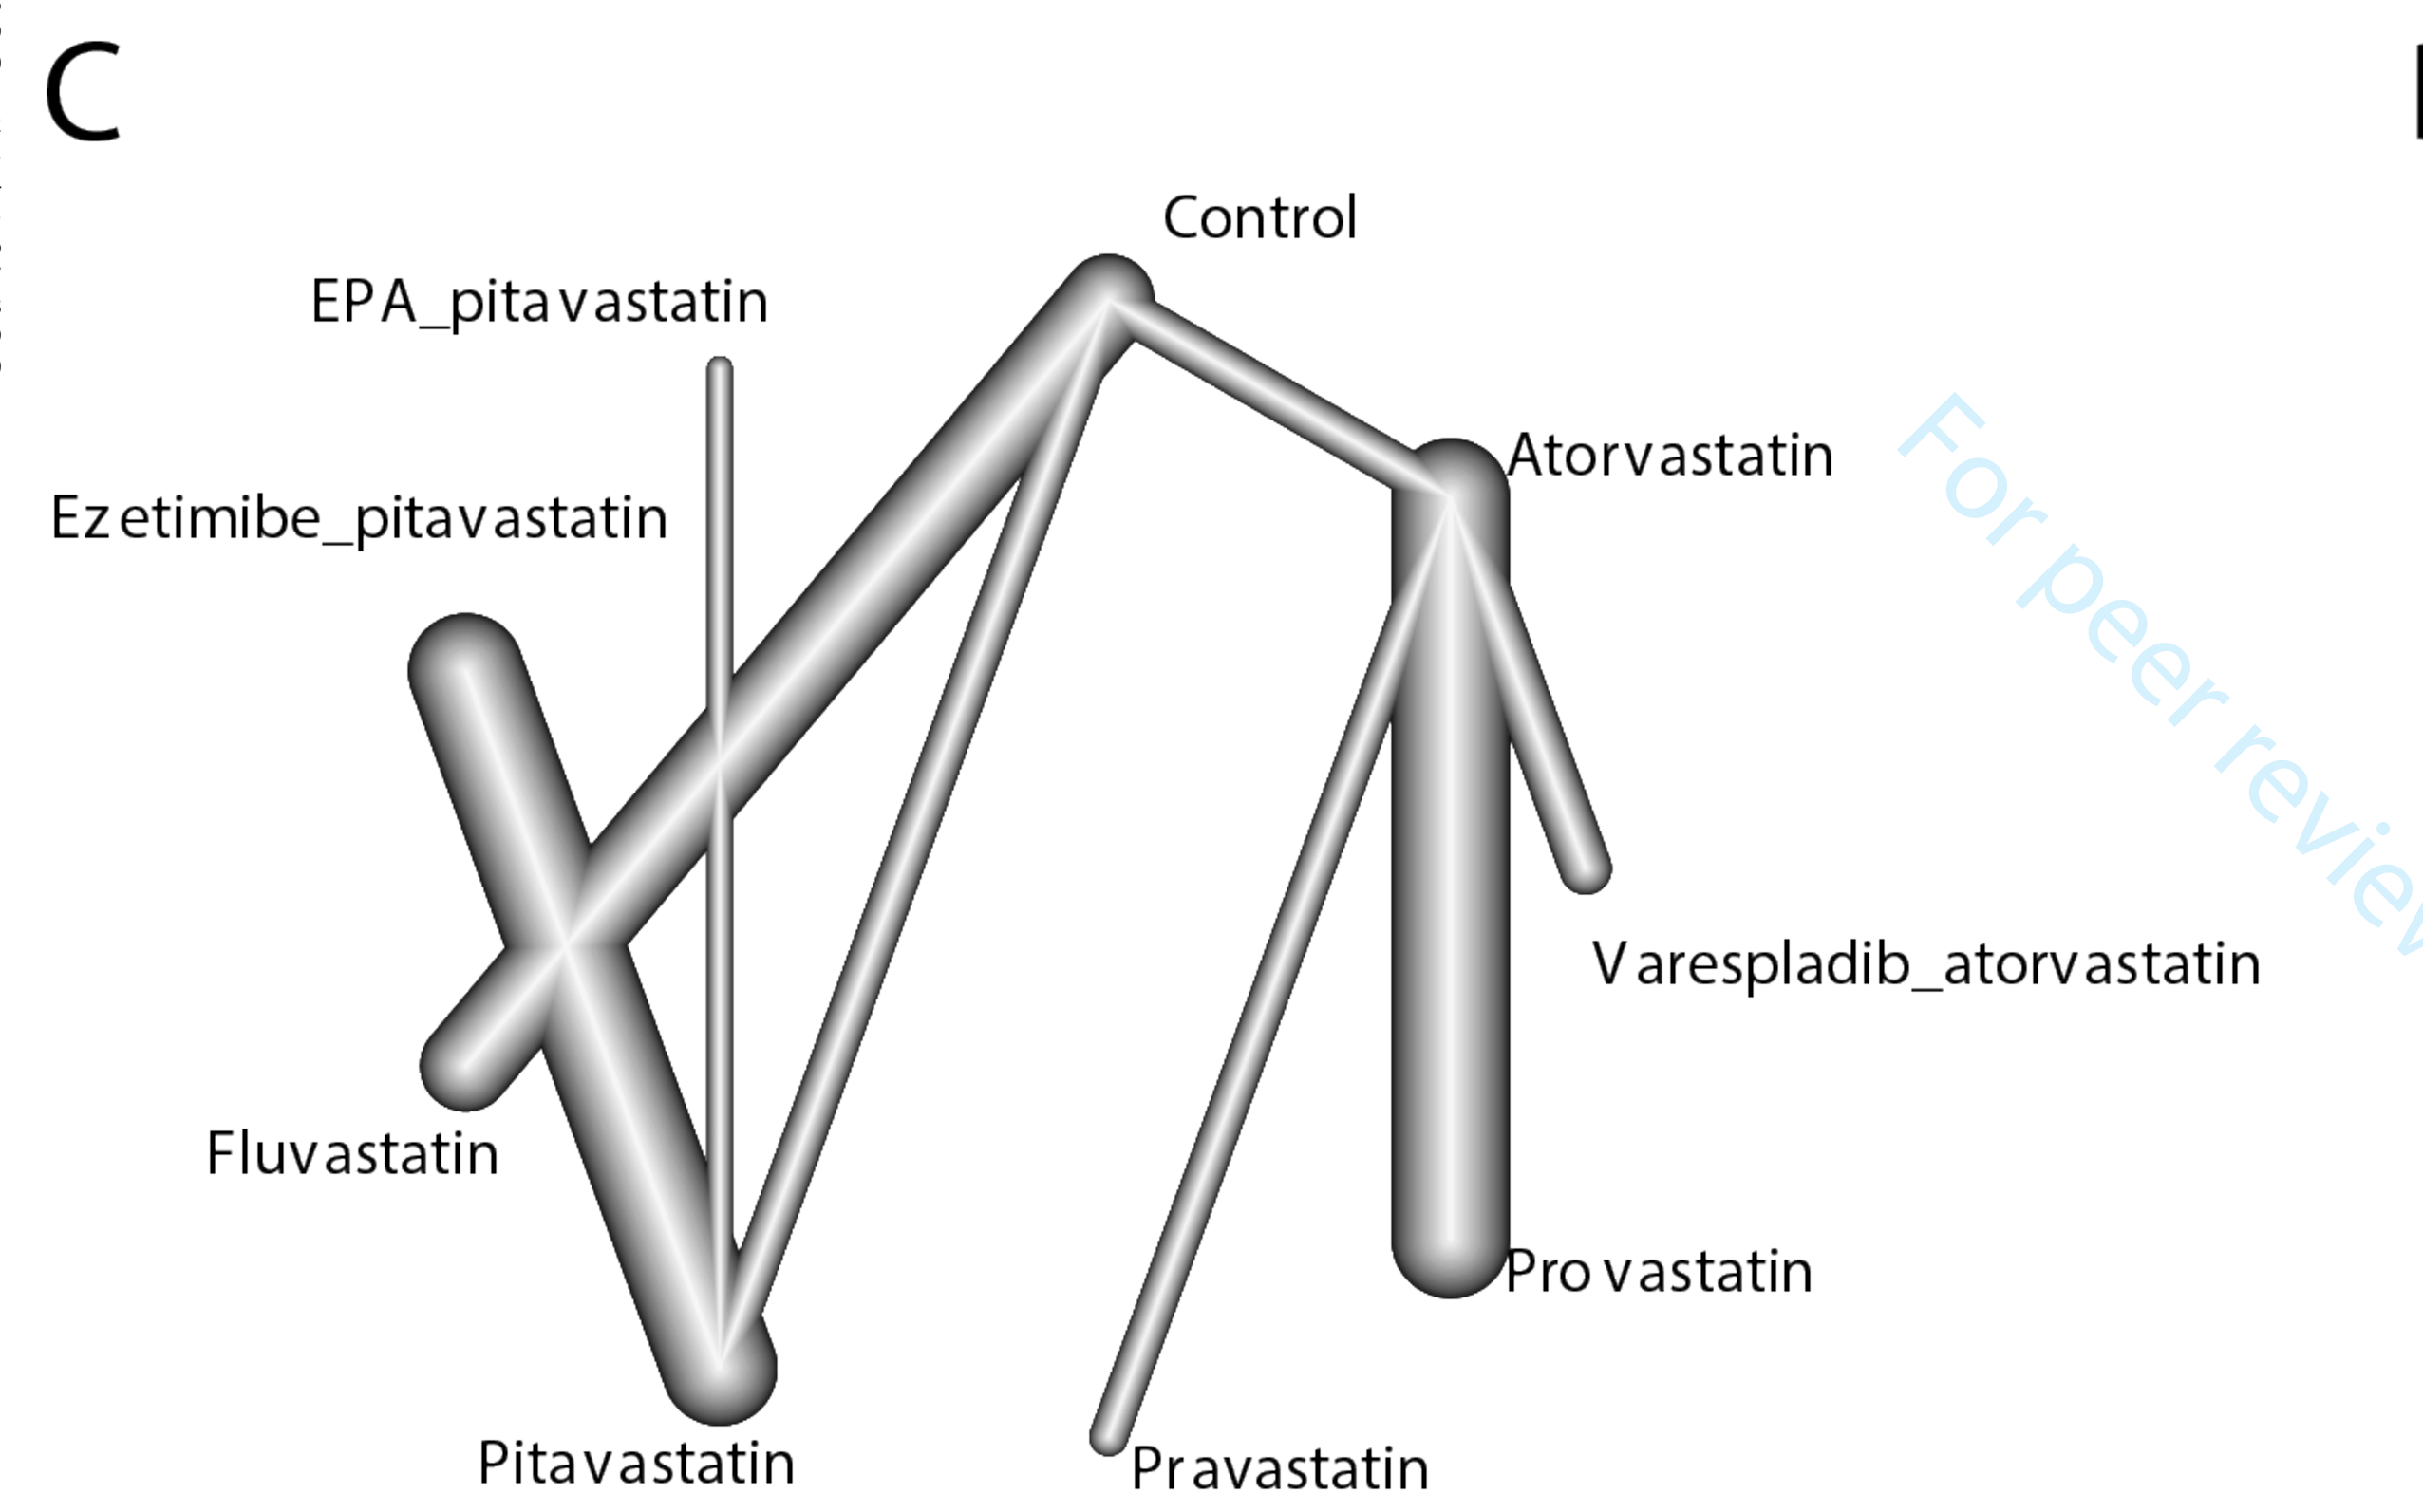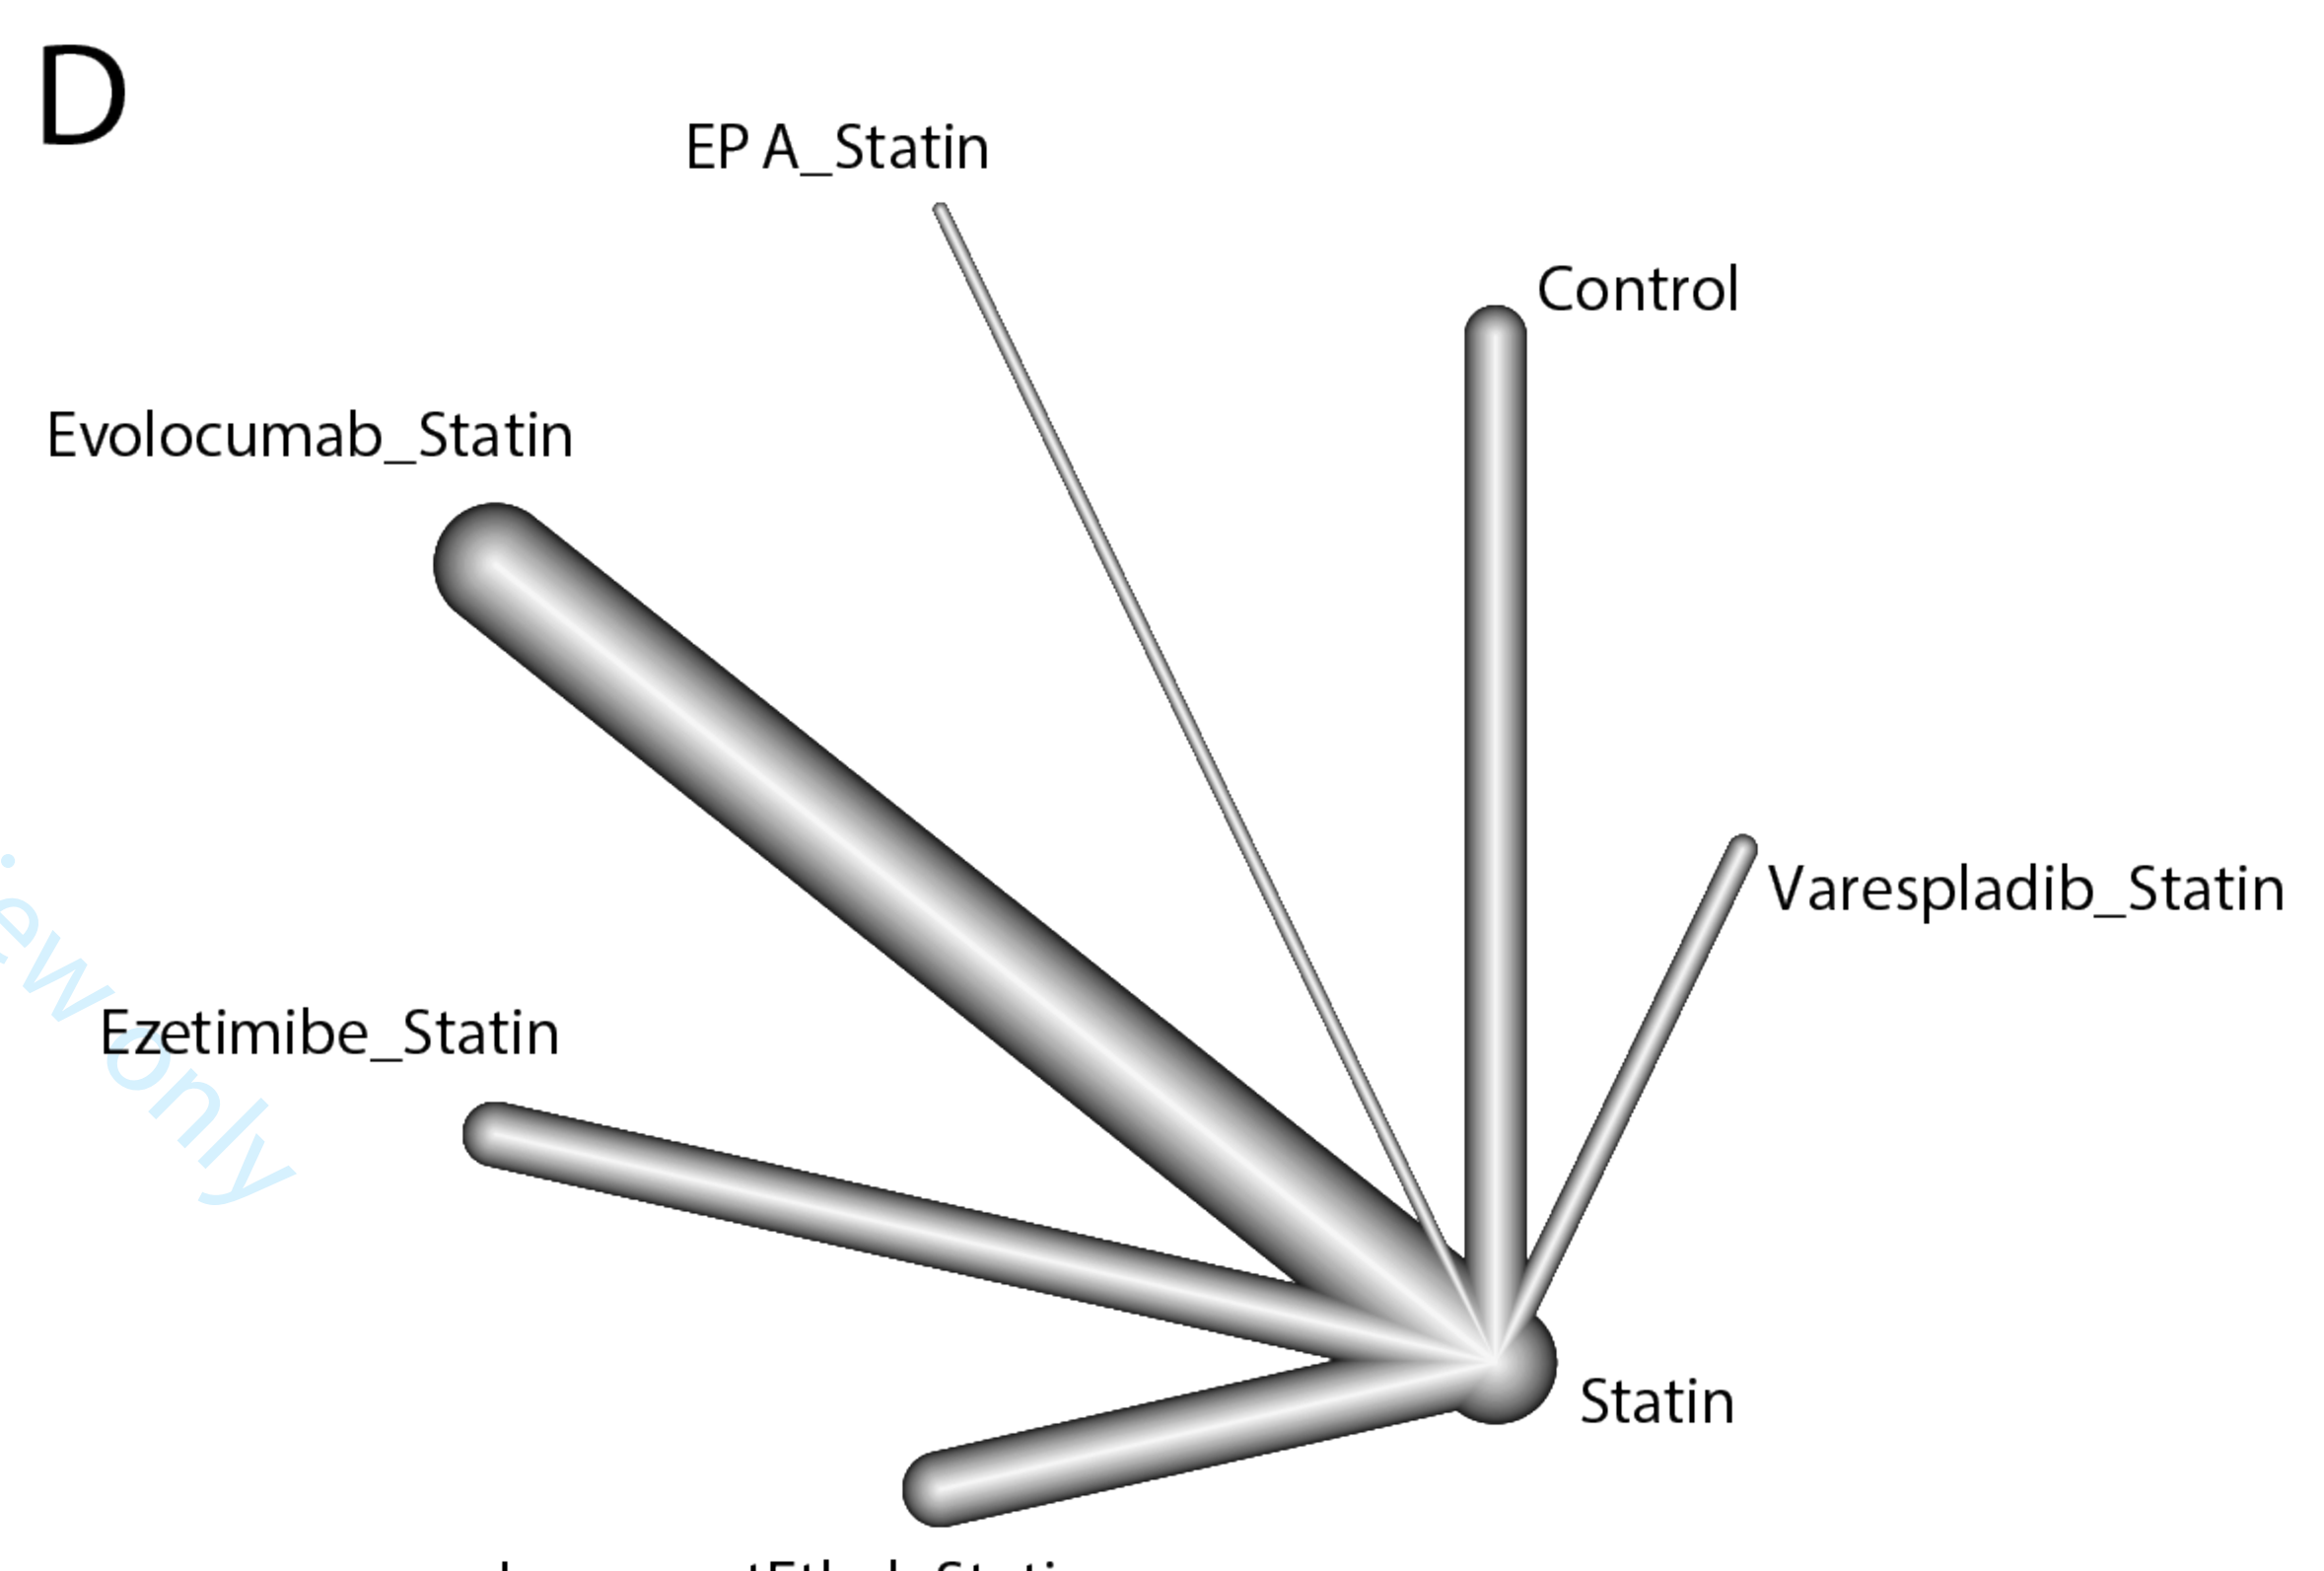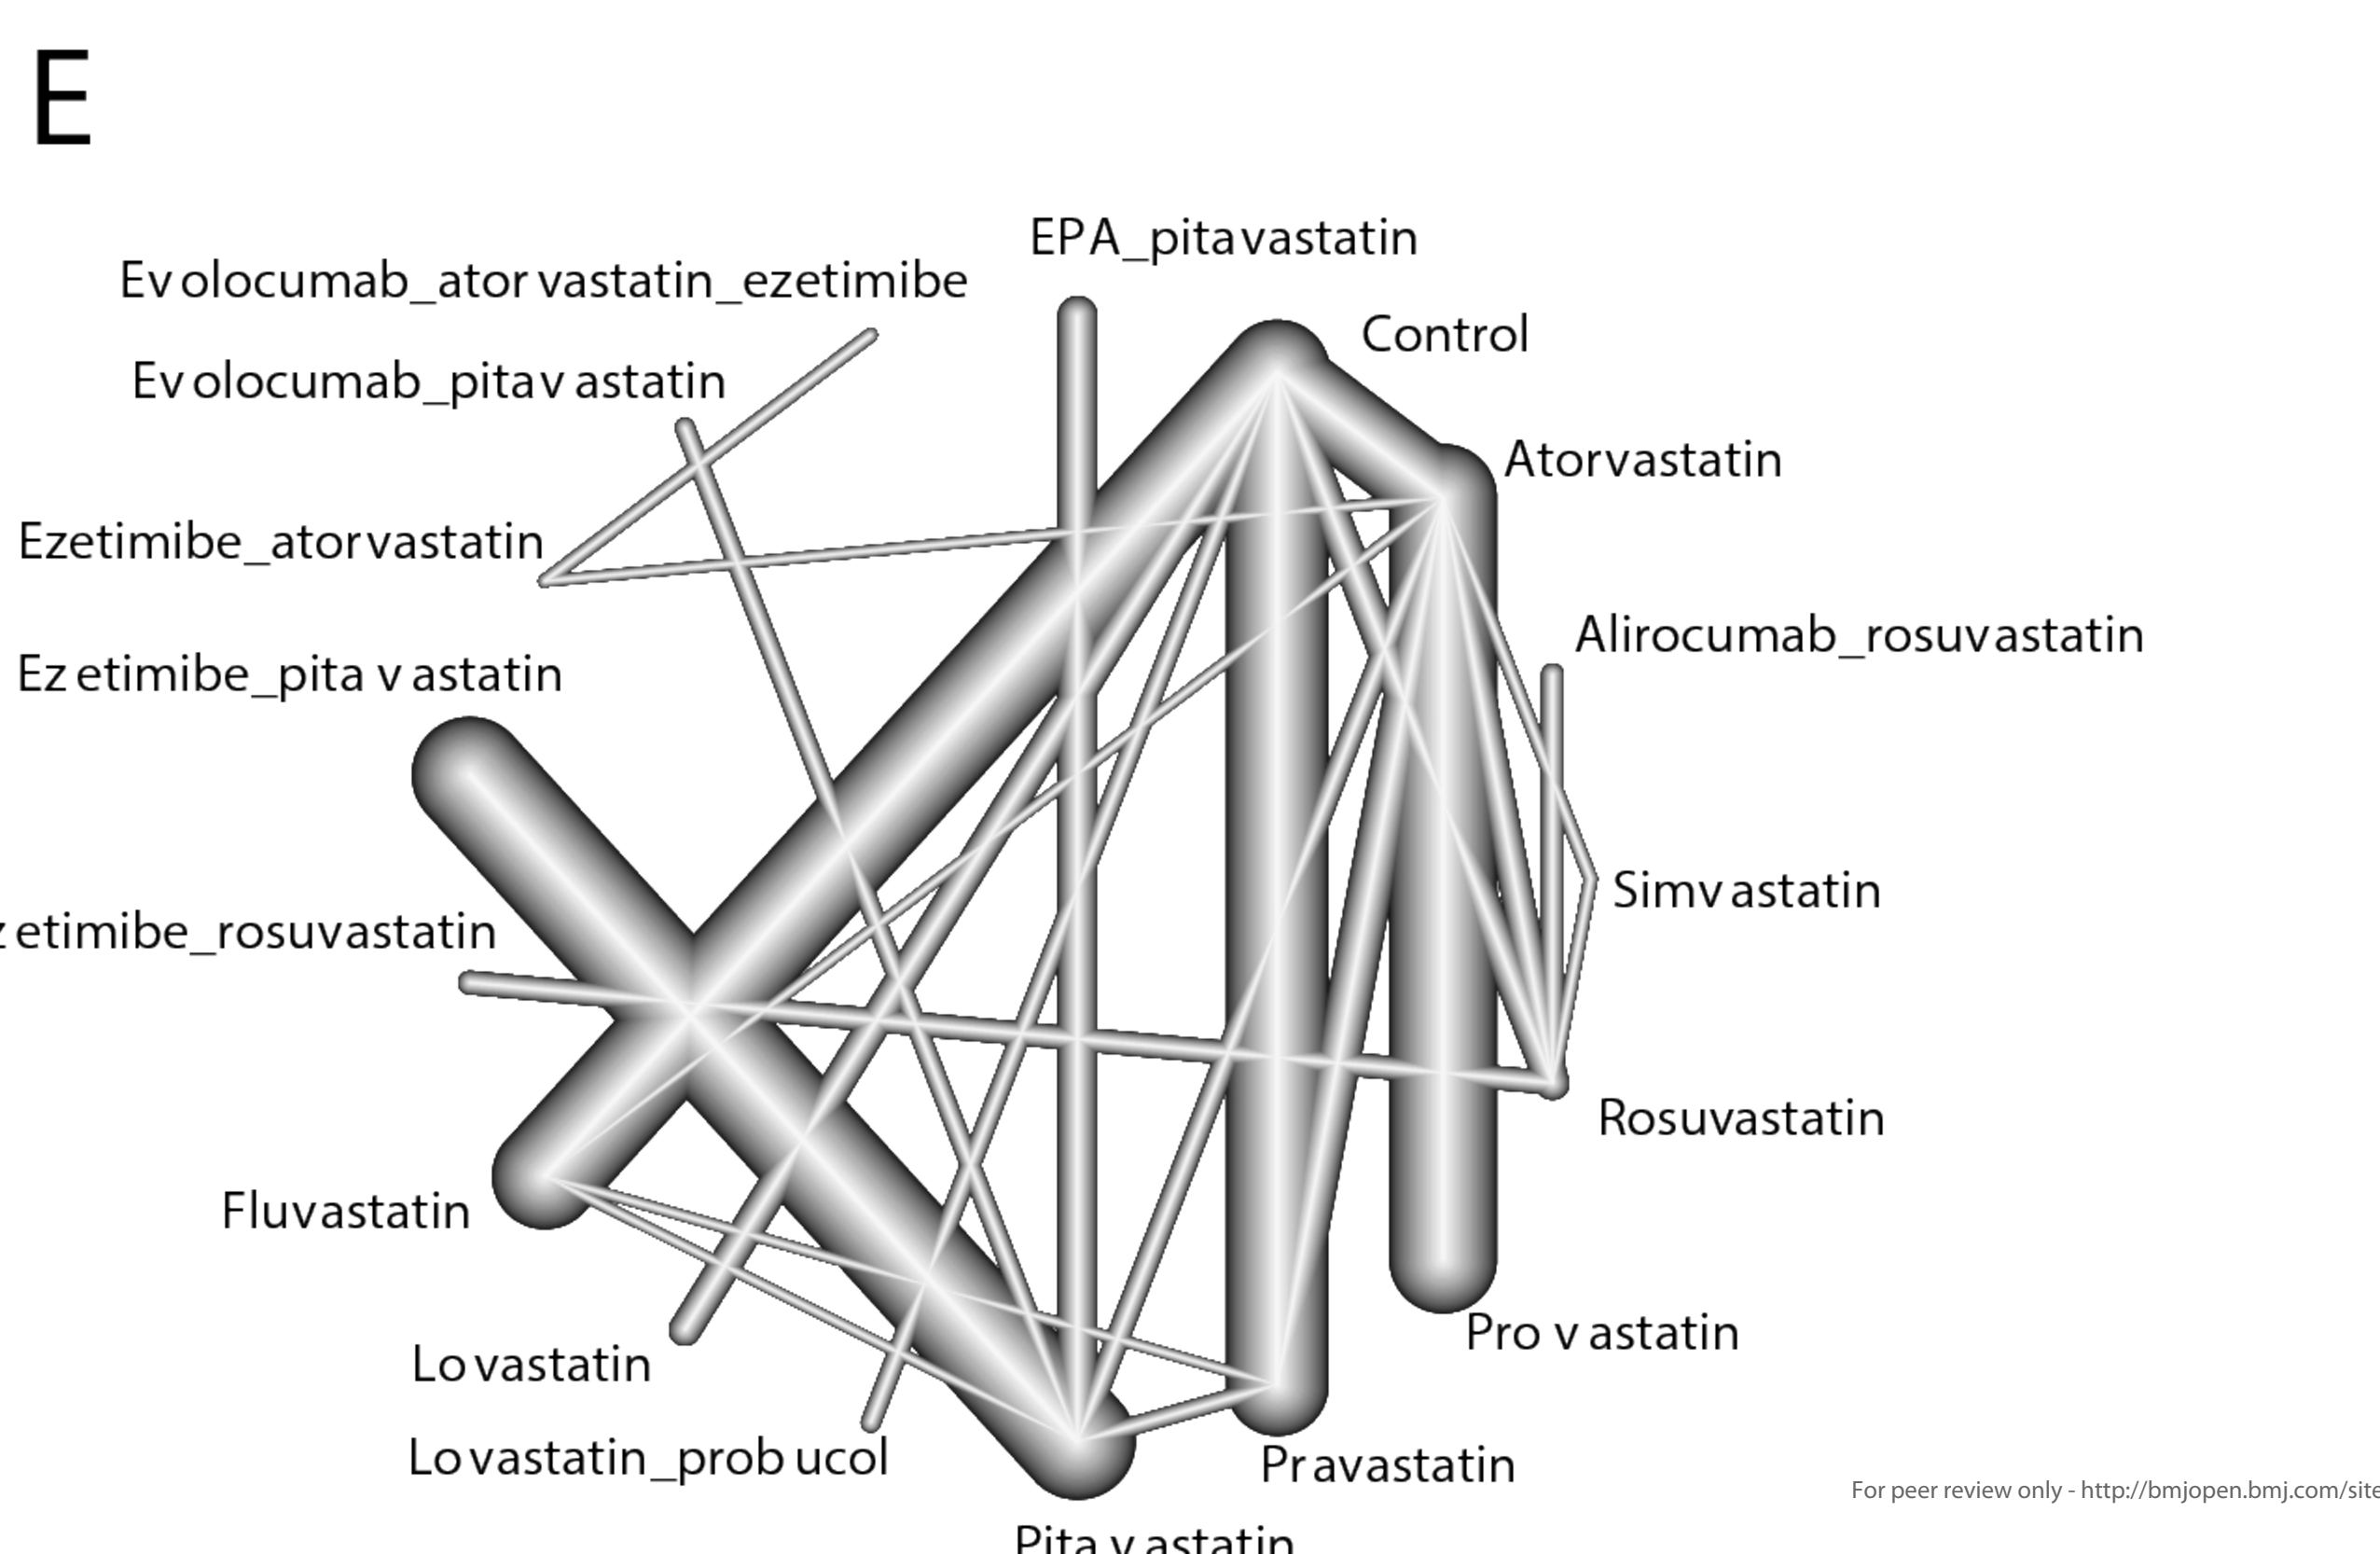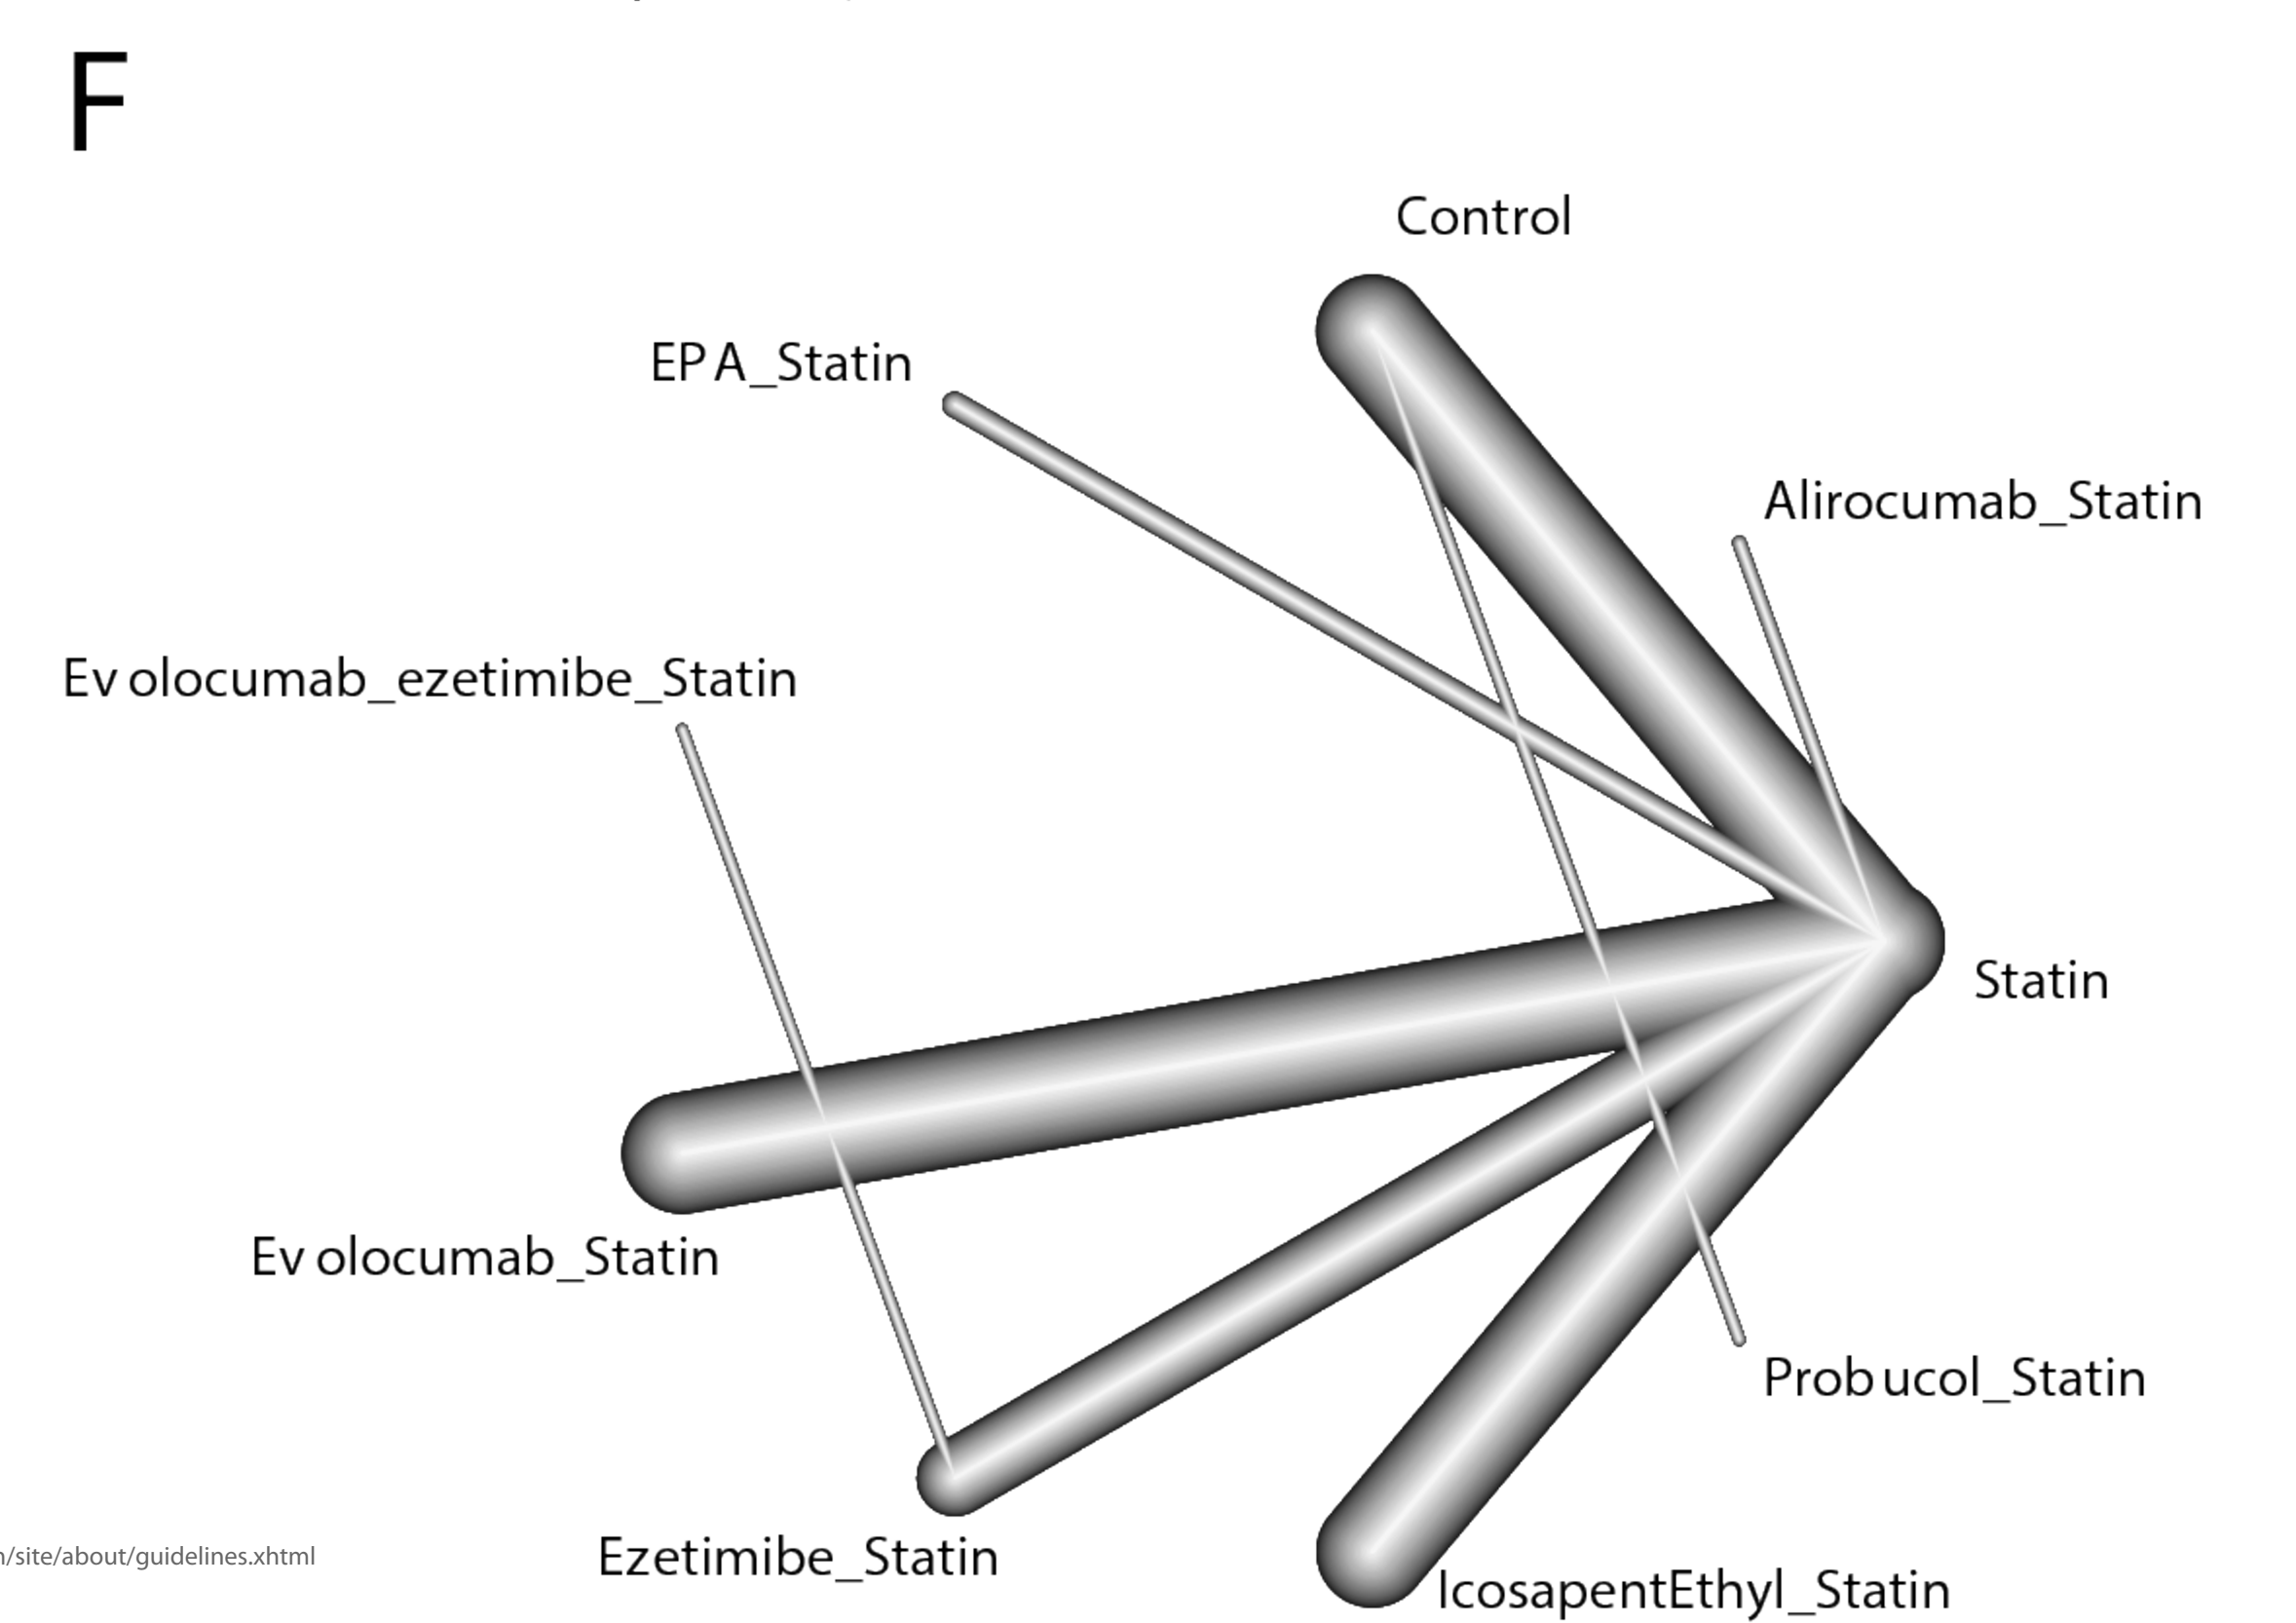

For peer review only

A

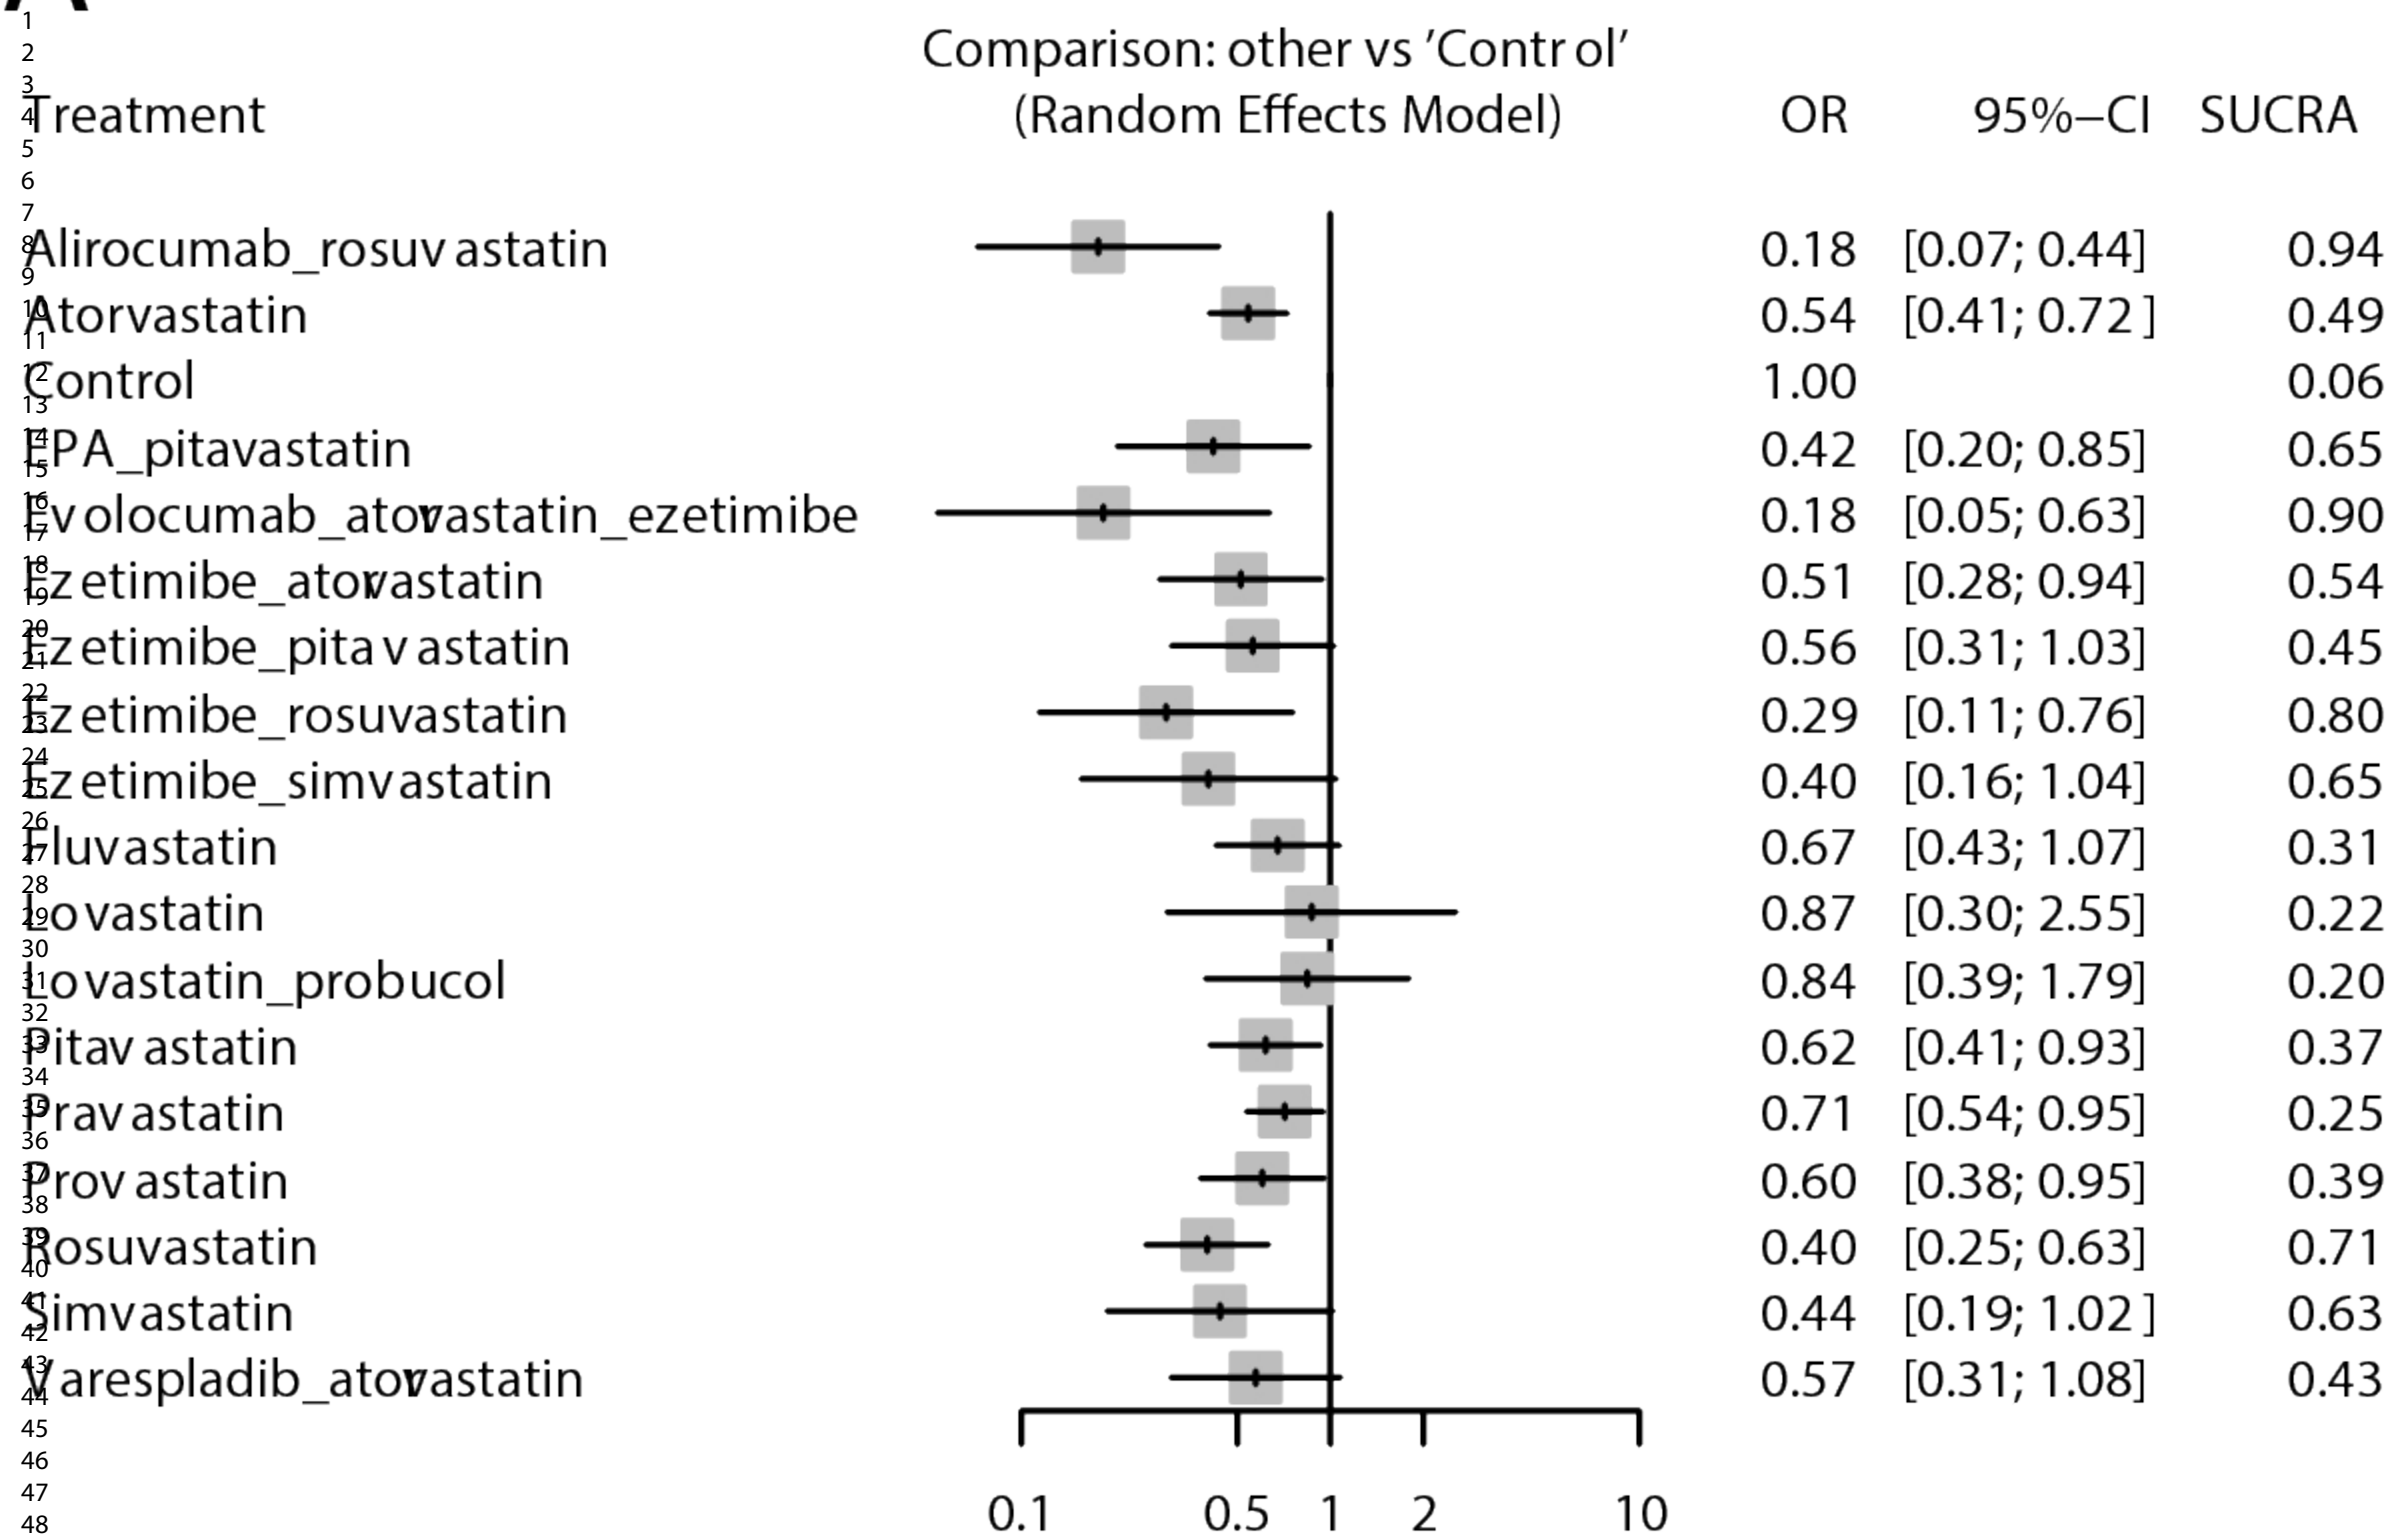

B

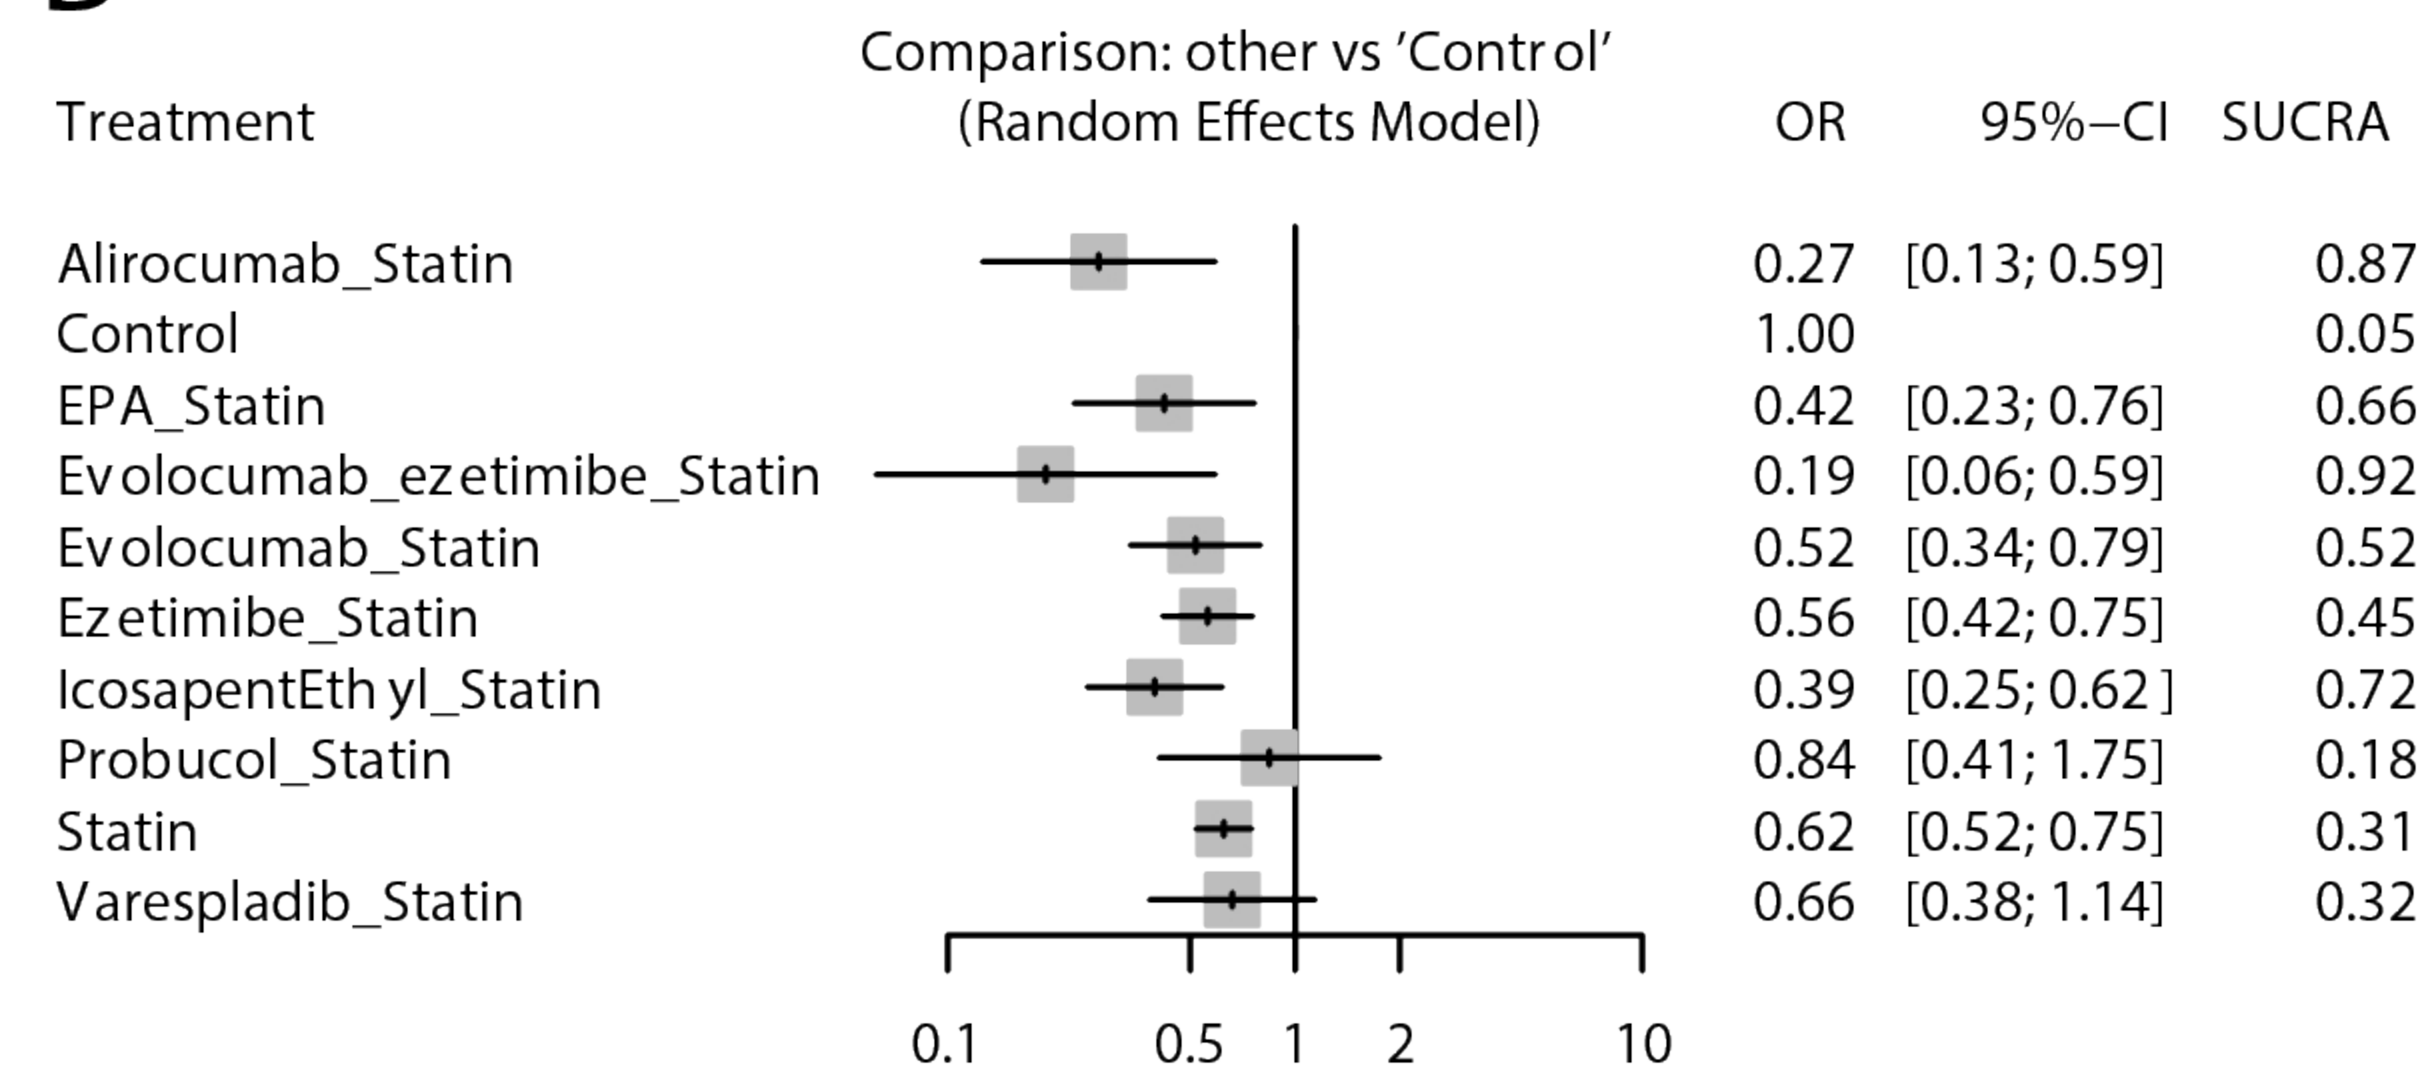

C

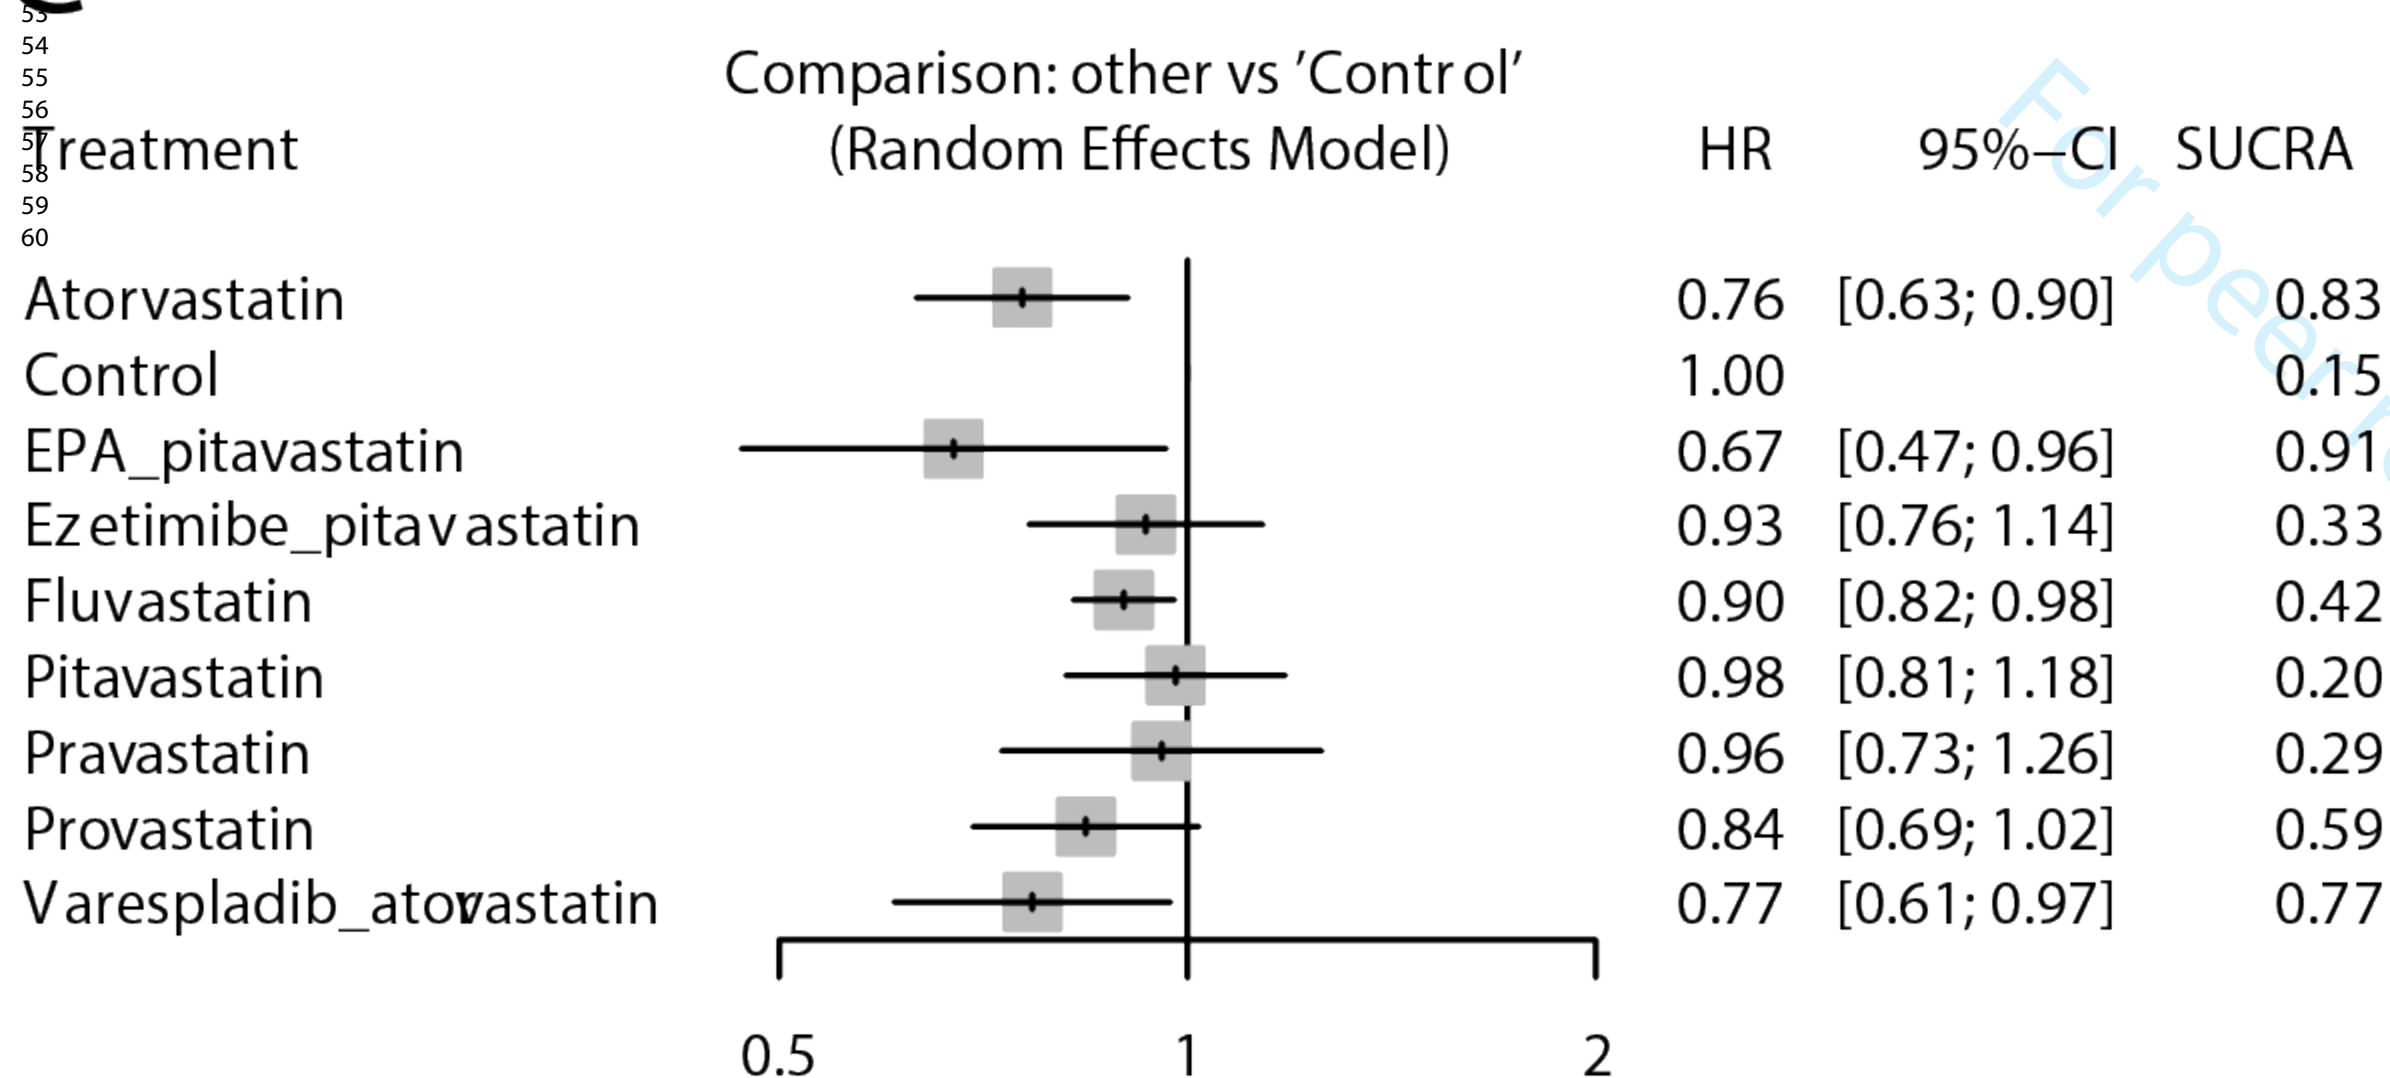

D



E



F



1  
2  
3  
4  
5  
6  
7  
8  
9  
10  
11  
12  
13  
14  
15  
16  
17  
18  
19  
20  
21  
22  
23  
24  
25  
26  
27  
28  
29  
30  
31  
32  
33  
34  
35  
36  
37  
38  
39  
40  
41  
42  
43  
44  
45  
46  
47  
48  
49  
50  
51  
52  
53  
54  
55  
56  
57  
58  
59  
60

C

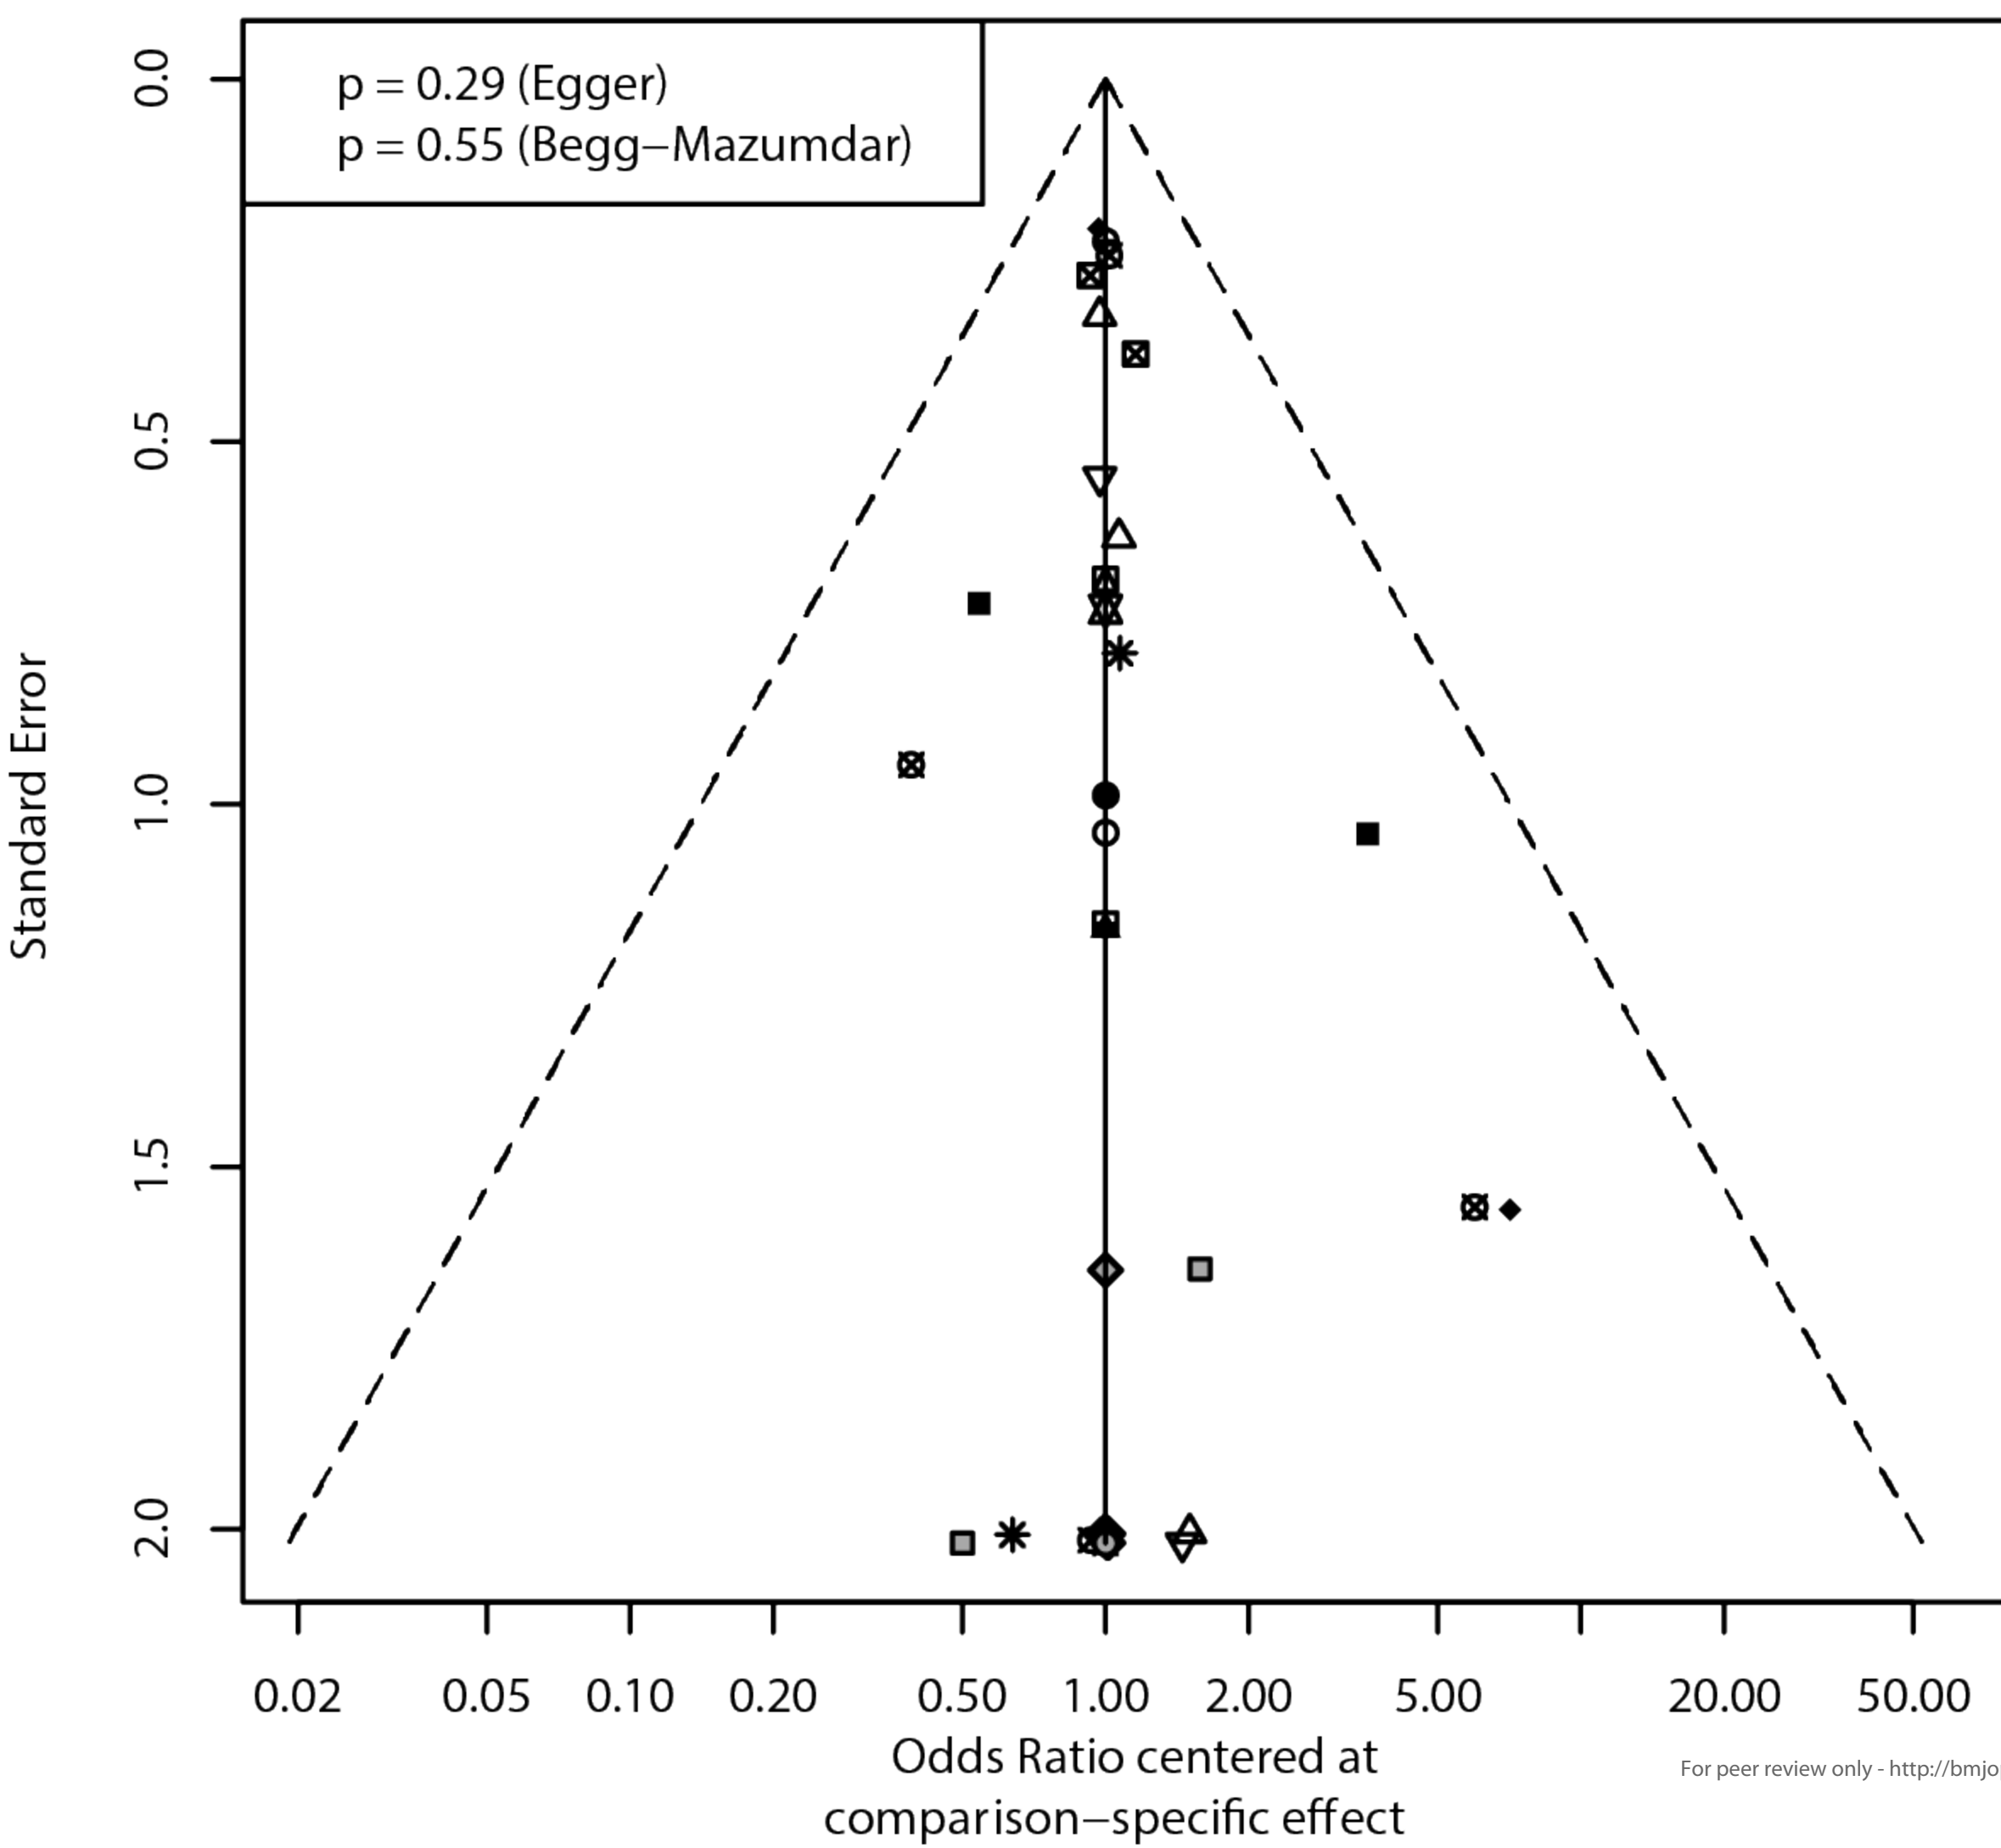

B

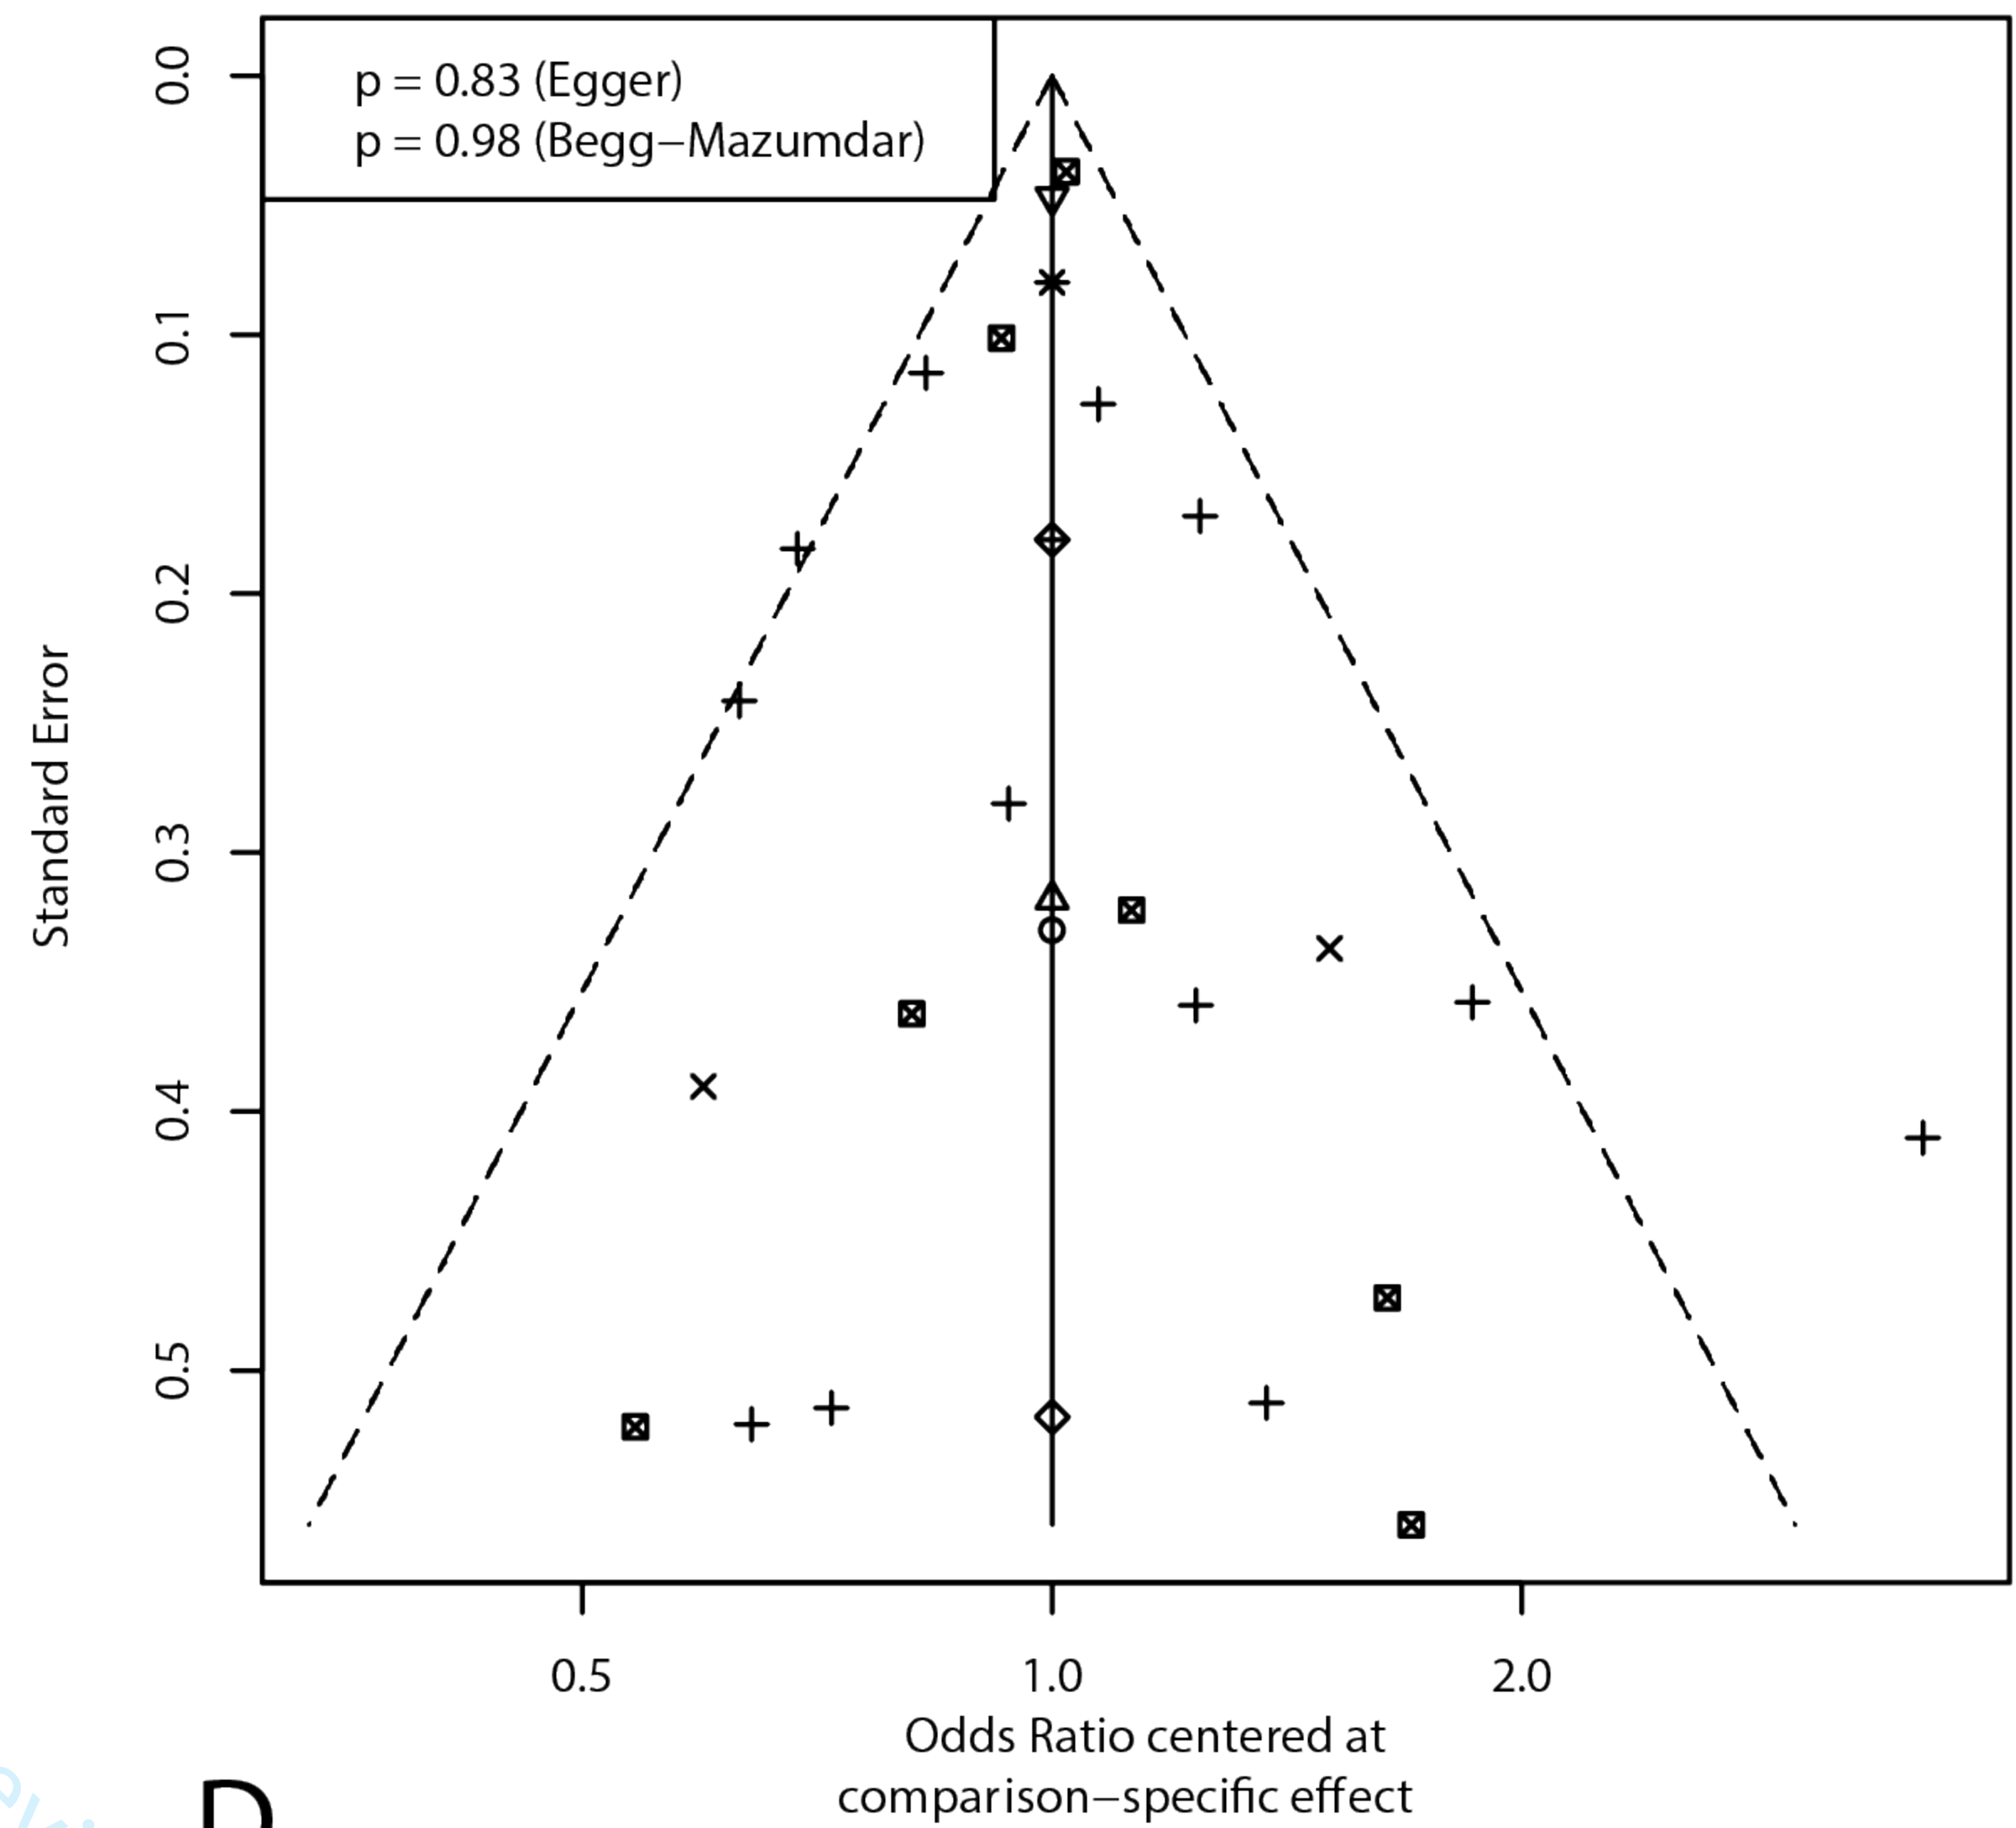

D

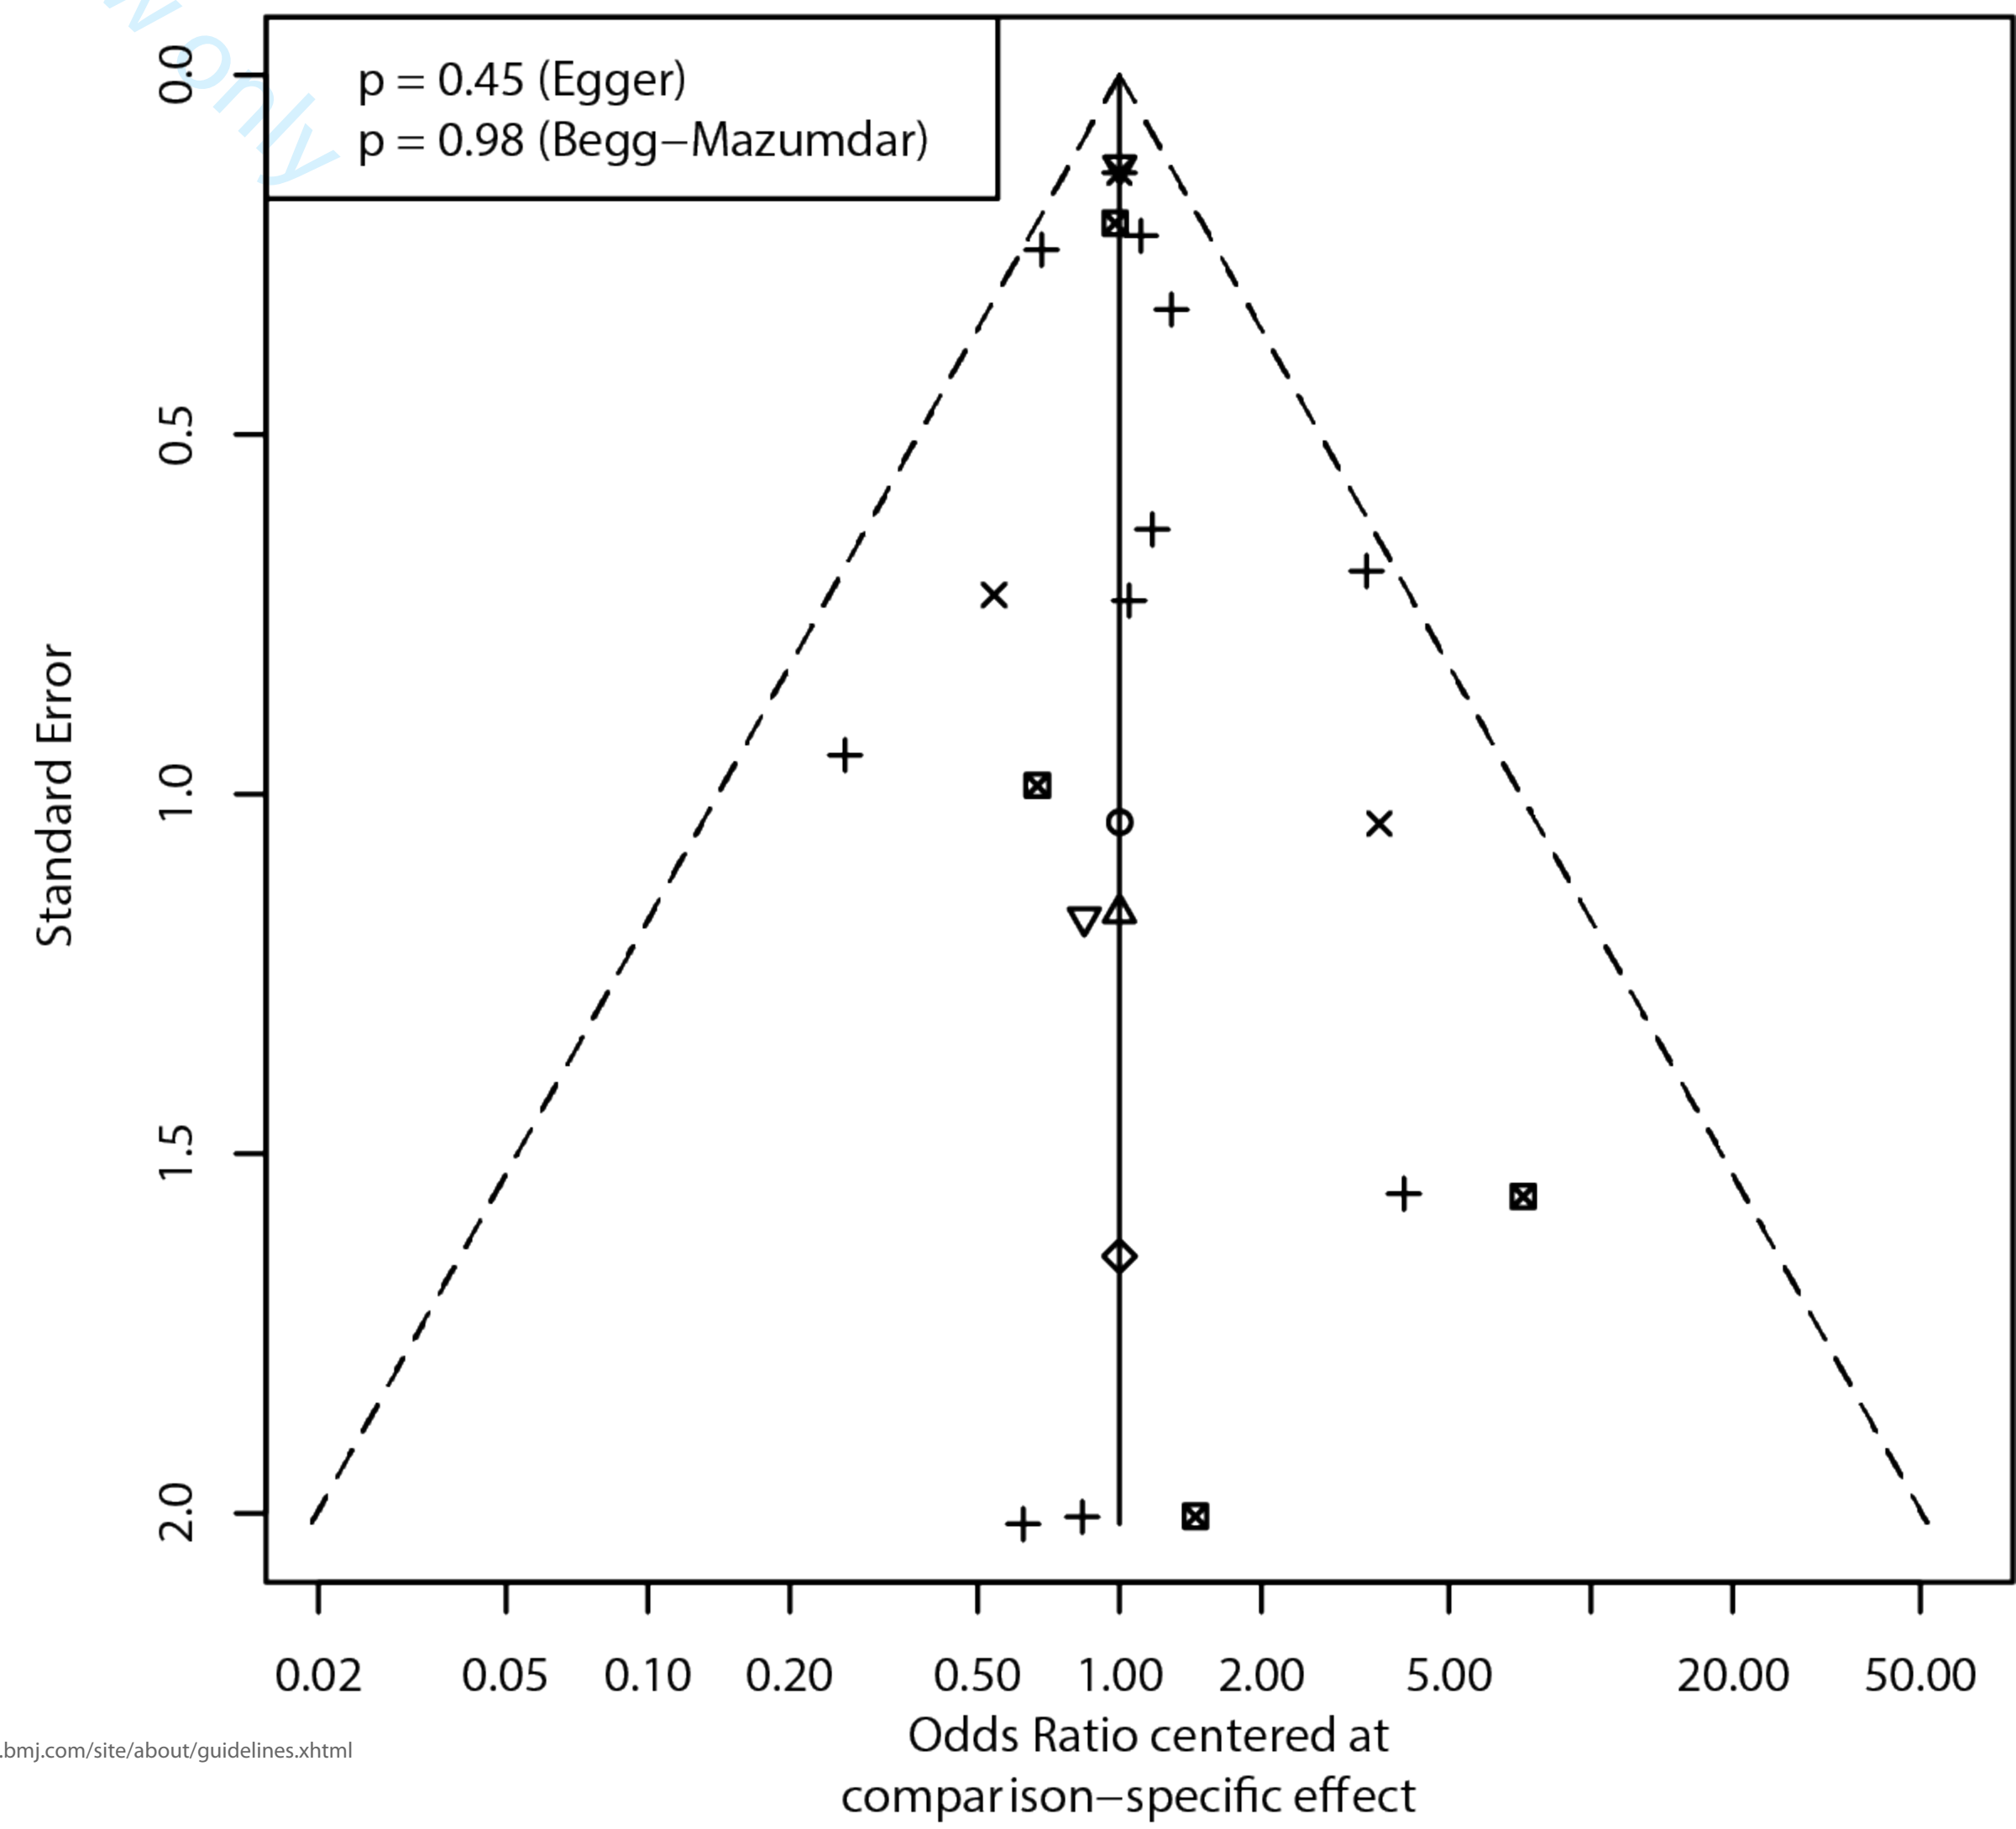

### The full search strategy for all databases.

a. The search query used in PubMed database without language or other additional limits.

| Search number | Query                                                                                                                                                                                                                                                                                                                                          | Results   |
|---------------|------------------------------------------------------------------------------------------------------------------------------------------------------------------------------------------------------------------------------------------------------------------------------------------------------------------------------------------------|-----------|
| 4             | ((#1) AND (#2)) AND (#3)                                                                                                                                                                                                                                                                                                                       | 553       |
| 3             | Random* or randomized or randomised                                                                                                                                                                                                                                                                                                            | 1,591,835 |
| 2             | "percutaneous coronary intervention" OR "Coronary angioplasty"                                                                                                                                                                                                                                                                                 | 61,003    |
| 1             | Statin or Simvastatin or Rosuvastatin or Atorvastatin or Fluvastatin or Lovastatin or Pravastatin or Mevastatin or ezetimibe or "Icosapent Ethyl" or "Bempedoic acid" or fibrate or evolocumab or Alirocumab or evinacumab or Volanesorsen or Vupanorsen or Pelacarsen or Olezarsen or Pelacarsen or Inclisiran or olpasiran or Lipid-lowering | 88,902    |

b. The search strategy used in EmBase database without language or other additional limits.

| No. | Query                                                                                                                                                                                                                                                                                                                                                                                                                                                                                                                                                                                                                                                                                                                                                                                                                                                                                                                                                                                                      | Results |
|-----|------------------------------------------------------------------------------------------------------------------------------------------------------------------------------------------------------------------------------------------------------------------------------------------------------------------------------------------------------------------------------------------------------------------------------------------------------------------------------------------------------------------------------------------------------------------------------------------------------------------------------------------------------------------------------------------------------------------------------------------------------------------------------------------------------------------------------------------------------------------------------------------------------------------------------------------------------------------------------------------------------------|---------|
| #4  | #1 AND #2 AND #3                                                                                                                                                                                                                                                                                                                                                                                                                                                                                                                                                                                                                                                                                                                                                                                                                                                                                                                                                                                           | 1308    |
| #3  | random* OR randomized                                                                                                                                                                                                                                                                                                                                                                                                                                                                                                                                                                                                                                                                                                                                                                                                                                                                                                                                                                                      | 2080906 |
| #2  | 'percutaneous coronary intervention' OR 'coronary angioplasty'                                                                                                                                                                                                                                                                                                                                                                                                                                                                                                                                                                                                                                                                                                                                                                                                                                                                                                                                             | 131280  |
| #1  | 'statin'/exp OR statin OR 'simvastatin'/exp OR simvastatin OR 'rosuvastatin'/exp OR rosuvastatin OR 'atorvastatin'/exp OR atorvastatin OR 'fluvastatin'/exp OR fluvastatin OR 'lovastatin'/exp OR lovastatin OR 'pravastatin'/exp OR pravastatin OR 'pitavastatin'/exp OR pitavastatin OR 'mevastatin'/exp OR mevastatin OR 'ezetimibe'/exp OR ezetimibe OR 'icosapentaenoic acid'/exp OR 'icosapentaenoic acid' OR 'icosapent ethyl'/exp OR 'icosapent ethyl' OR 'bempedoic acid'/exp OR 'bempedoic acid' OR 'fibrate'/exp OR fibrate OR 'bezafibrate'/exp OR bezafibrate OR 'gemfibrozil'/exp OR gemfibrozil OR 'fenofibrate'/exp OR fenofibrate OR 'ciprofibrate'/exp OR ciprofibrate OR 'evolocumab'/exp OR evolocumab OR 'alirocumab'/exp OR alirocumab OR evinacumab OR 'volanesorsen'/exp OR volanesorsen OR 'vupanorsen'/exp OR vupanorsen OR 'pelacarsen'/exp OR pelacarsen OR 'olezarsen'/exp OR olezarsen OR 'inclisiran'/exp OR inclisiran OR 'olpasiran'/exp OR olpasiran OR 'lipid lowering' | 167569  |

c. The search strategy used in Cochrane library database without language or other additional limits.

| ID | Search | Hits |
|----|--------|------|
|----|--------|------|

|    |                                                                     |         |
|----|---------------------------------------------------------------------|---------|
| 1  |                                                                     |         |
| 2  |                                                                     |         |
| 3  | <b>#1</b>                                                           | 19395   |
| 4  | (Statin OR Simvastatin OR Rosuvastatin OR Atorvastatin OR           |         |
| 5  | Fluvastatin OR Lovastatin OR Pravastatin OR Pitavastatin or         |         |
| 6  | Mevastatin OR ezetimibe OR "Eicosapentaenoic Acid" OR "Icosapent    |         |
| 7  | Ethyl" OR "Bempedoic acid" OR Fibrate OR Bezafibrate OR Gemfibrozil |         |
| 8  | OR Fenofibrate OR Ciprofibrate OR Evolocumab OR Alirocumab OR       |         |
| 9  | Evinacumab OR Volanesorsen OR Vupanorsen OR Pelacarsen OR           |         |
| 10 | Olezarsen OR Inclisiran OR Olpasiran OR Lipid-lowering)             |         |
| 11 |                                                                     |         |
| 12 | <b>#2</b>                                                           | 13623   |
| 13 | "Percutaneous coronary intervention" OR "Coronary angioplasty"      |         |
| 14 | <b>#3</b>                                                           | 1346916 |
| 15 | Random* OR randomized                                               |         |
| 16 | <b>#4</b>                                                           | 690     |
| 17 | #1 AND #2 AND #3                                                    |         |

For peer review only

PRISMA NMA Checklist of Items to Include When Reporting A Systematic Review Involving a Network Meta-analysis

| Section/Topic             | Item # | Checklist Item                                                                                                                                                                                                                                                                                                                                                                                                                                                                                                                                                                                                                                                                                                                                                                                     | Reported on Page # |
|---------------------------|--------|----------------------------------------------------------------------------------------------------------------------------------------------------------------------------------------------------------------------------------------------------------------------------------------------------------------------------------------------------------------------------------------------------------------------------------------------------------------------------------------------------------------------------------------------------------------------------------------------------------------------------------------------------------------------------------------------------------------------------------------------------------------------------------------------------|--------------------|
| <b>TITLE</b>              |        |                                                                                                                                                                                                                                                                                                                                                                                                                                                                                                                                                                                                                                                                                                                                                                                                    |                    |
| Title                     | 1      | Identify the report as a systematic review <i>incorporating a network meta-analysis (or related form of meta-analysis)</i> .                                                                                                                                                                                                                                                                                                                                                                                                                                                                                                                                                                                                                                                                       | <b>P.1</b>         |
| <b>ABSTRACT</b>           |        |                                                                                                                                                                                                                                                                                                                                                                                                                                                                                                                                                                                                                                                                                                                                                                                                    |                    |
| Structured summary        | 2      | Provide a structured summary including, as applicable:<br><b>Background:</b> main objectives<br><b>Methods:</b> data sources; study eligibility criteria, participants, and interventions; study appraisal; and <i>synthesis methods, such as network meta-analysis</i> .<br><b>Results:</b> number of studies and participants identified; summary estimates with corresponding confidence/credible intervals; <i>treatment rankings may also be discussed</i> .<br><i>Authors may choose to summarize pairwise comparisons against a chosen treatment included in their analyses for brevity.</i><br><b>Discussion/Conclusions:</b> limitations; conclusions and implications of findings.<br><b>Other:</b> primary source of funding; systematic review registration number with registry name. | P.2                |
| <b>INTRODUCTION</b>       |        |                                                                                                                                                                                                                                                                                                                                                                                                                                                                                                                                                                                                                                                                                                                                                                                                    |                    |
| Rationale                 | 3      | Describe the rationale for the review in the context of what is already known, <i>including mention of why a network meta-analysis has been conducted</i> .                                                                                                                                                                                                                                                                                                                                                                                                                                                                                                                                                                                                                                        | <b>P.3-P.4</b>     |
| Objectives                | 4      | Provide an explicit statement of questions being addressed, with reference to participants, interventions, comparisons, outcomes, and study design (PICOS).                                                                                                                                                                                                                                                                                                                                                                                                                                                                                                                                                                                                                                        | P.4                |
| <b>METHODS</b>            |        |                                                                                                                                                                                                                                                                                                                                                                                                                                                                                                                                                                                                                                                                                                                                                                                                    |                    |
| Protocol and registration | 5      | Indicate whether a review protocol exists and if and where it can be accessed (e.g., Web address); and, if available, provide registration information, including registration number.                                                                                                                                                                                                                                                                                                                                                                                                                                                                                                                                                                                                             | P.4- P.5           |
| Eligibility criteria      | 6      | Specify study characteristics (e.g., PICOS, length of follow-up) and report characteristics (e.g., years considered, language, publication status) used as criteria for eligibility, giving rationale. <i>Clearly describe eligible treatments included in the treatment network, and note whether any have been clustered or merged into the same node (with justification)</i> .                                                                                                                                                                                                                                                                                                                                                                                                                 | <b>P.5-P.6</b>     |
| Information sources       | 7      | Describe all information sources (e.g., databases with dates of coverage, contact with study authors to identify additional studies) in the search and date last searched.                                                                                                                                                                                                                                                                                                                                                                                                                                                                                                                                                                                                                         | P.5                |
| Search                    | 8      | Present full electronic search strategy for at least one                                                                                                                                                                                                                                                                                                                                                                                                                                                                                                                                                                                                                                                                                                                                           | P.5                |

|    |                                        |                                                            |                                                                                                                                                                                                                                                                                                                                                                                                                                                   |            |
|----|----------------------------------------|------------------------------------------------------------|---------------------------------------------------------------------------------------------------------------------------------------------------------------------------------------------------------------------------------------------------------------------------------------------------------------------------------------------------------------------------------------------------------------------------------------------------|------------|
| 1  |                                        | database, including any limits used, such that it could be |                                                                                                                                                                                                                                                                                                                                                                                                                                                   |            |
| 2  |                                        | repeated.                                                  |                                                                                                                                                                                                                                                                                                                                                                                                                                                   |            |
| 3  |                                        |                                                            |                                                                                                                                                                                                                                                                                                                                                                                                                                                   |            |
| 4  | Study selection                        | 9                                                          | State the process for selecting studies (i.e., screening, eligibility, included in systematic review, and, if applicable, included in the meta-analysis).                                                                                                                                                                                                                                                                                         | P.5-P.6    |
| 5  |                                        |                                                            |                                                                                                                                                                                                                                                                                                                                                                                                                                                   |            |
| 6  | Data collection                        | 10                                                         | Describe method of data extraction from reports (e.g., piloted forms, independently, in duplicate) and any processes for obtaining and confirming data from investigators.                                                                                                                                                                                                                                                                        | P.6-P.7    |
| 7  | process                                |                                                            |                                                                                                                                                                                                                                                                                                                                                                                                                                                   |            |
| 8  |                                        |                                                            |                                                                                                                                                                                                                                                                                                                                                                                                                                                   |            |
| 9  |                                        |                                                            |                                                                                                                                                                                                                                                                                                                                                                                                                                                   |            |
| 10 | Data items                             | 11                                                         | List and define all variables for which data were sought (e.g., PICOS, funding sources) and any assumptions and simplifications made.                                                                                                                                                                                                                                                                                                             | P.6-P.7    |
| 11 |                                        |                                                            |                                                                                                                                                                                                                                                                                                                                                                                                                                                   |            |
| 12 |                                        |                                                            |                                                                                                                                                                                                                                                                                                                                                                                                                                                   |            |
| 13 | <b>Geometry of the network</b>         | <b>S1</b>                                                  | Describe methods used to explore the geometry of the treatment network under study and potential biases related to it. This should include how the evidence base has been graphically summarized for presentation, and what characteristics were compiled and used to describe the evidence base to readers.                                                                                                                                      | <b>P.7</b> |
| 14 |                                        |                                                            |                                                                                                                                                                                                                                                                                                                                                                                                                                                   |            |
| 15 |                                        |                                                            |                                                                                                                                                                                                                                                                                                                                                                                                                                                   |            |
| 16 |                                        |                                                            |                                                                                                                                                                                                                                                                                                                                                                                                                                                   |            |
| 17 |                                        |                                                            |                                                                                                                                                                                                                                                                                                                                                                                                                                                   |            |
| 18 |                                        |                                                            |                                                                                                                                                                                                                                                                                                                                                                                                                                                   |            |
| 19 | Risk of bias within individual studies | 12                                                         | Describe methods used for assessing risk of bias of individual studies (including specification of whether this was done at the study or outcome level), and how this information is to be used in any data synthesis.                                                                                                                                                                                                                            | P.7        |
| 20 |                                        |                                                            |                                                                                                                                                                                                                                                                                                                                                                                                                                                   |            |
| 21 |                                        |                                                            |                                                                                                                                                                                                                                                                                                                                                                                                                                                   |            |
| 22 |                                        |                                                            |                                                                                                                                                                                                                                                                                                                                                                                                                                                   |            |
| 23 | Summary measures                       | 13                                                         | State the principal summary measures (e.g., risk ratio, difference in means). <i>Also describe the use of additional summary measures assessed, such as treatment rankings and surface under the cumulative ranking curve (SUCRA) values, as well as modified approaches used to present summary findings from meta-analyses.</i>                                                                                                                 | P.7        |
| 24 |                                        |                                                            |                                                                                                                                                                                                                                                                                                                                                                                                                                                   |            |
| 25 |                                        |                                                            |                                                                                                                                                                                                                                                                                                                                                                                                                                                   |            |
| 26 |                                        |                                                            |                                                                                                                                                                                                                                                                                                                                                                                                                                                   |            |
| 27 |                                        |                                                            |                                                                                                                                                                                                                                                                                                                                                                                                                                                   |            |
| 28 |                                        |                                                            |                                                                                                                                                                                                                                                                                                                                                                                                                                                   |            |
| 29 |                                        |                                                            |                                                                                                                                                                                                                                                                                                                                                                                                                                                   |            |
| 30 | Planned methods of analysis            | 14                                                         | Describe the methods of handling data and combining results of studies for each network meta-analysis. This should include, but not be limited to: <ul style="list-style-type: none"> <li>• <i>Handling of multi-arm trials;</i></li> <li>• <i>Selection of variance structure;</i></li> <li>• <i>Selection of prior distributions in Bayesian analyses; and</i></li> <li>• <i>Assessment of model fit.</i></li> </ul>                            | P.7        |
| 31 |                                        |                                                            |                                                                                                                                                                                                                                                                                                                                                                                                                                                   |            |
| 32 |                                        |                                                            |                                                                                                                                                                                                                                                                                                                                                                                                                                                   |            |
| 33 |                                        |                                                            |                                                                                                                                                                                                                                                                                                                                                                                                                                                   |            |
| 34 |                                        |                                                            |                                                                                                                                                                                                                                                                                                                                                                                                                                                   |            |
| 35 |                                        |                                                            |                                                                                                                                                                                                                                                                                                                                                                                                                                                   |            |
| 36 |                                        |                                                            |                                                                                                                                                                                                                                                                                                                                                                                                                                                   |            |
| 37 |                                        |                                                            |                                                                                                                                                                                                                                                                                                                                                                                                                                                   |            |
| 38 | <b>Assessment of Inconsistency</b>     | <b>S2</b>                                                  | Describe the statistical methods used to evaluate the agreement of direct and indirect evidence in the treatment network(s) studied. Describe efforts taken to address its presence when found.                                                                                                                                                                                                                                                   | P.7        |
| 39 |                                        |                                                            |                                                                                                                                                                                                                                                                                                                                                                                                                                                   |            |
| 40 |                                        |                                                            |                                                                                                                                                                                                                                                                                                                                                                                                                                                   |            |
| 41 |                                        |                                                            |                                                                                                                                                                                                                                                                                                                                                                                                                                                   |            |
| 42 |                                        |                                                            |                                                                                                                                                                                                                                                                                                                                                                                                                                                   |            |
| 43 | Risk of bias across studies            | 15                                                         | Specify any assessment of risk of bias that may affect the cumulative evidence (e.g., publication bias, selective reporting within studies).                                                                                                                                                                                                                                                                                                      | <b>P.7</b> |
| 44 |                                        |                                                            |                                                                                                                                                                                                                                                                                                                                                                                                                                                   |            |
| 45 |                                        |                                                            |                                                                                                                                                                                                                                                                                                                                                                                                                                                   |            |
| 46 | Additional analyses                    | 16                                                         | Describe methods of additional analyses if done, indicating which were pre-specified. This may include, but not be limited to, the following: <ul style="list-style-type: none"> <li>• Sensitivity or subgroup analyses;</li> <li>• Meta-regression analyses;</li> <li>• <i>Alternative formulations of the treatment network; and</i></li> <li>• <i>Use of alternative prior distributions for Bayesian analyses (if applicable).</i></li> </ul> | <i>n/a</i> |
| 47 |                                        |                                                            |                                                                                                                                                                                                                                                                                                                                                                                                                                                   |            |
| 48 |                                        |                                                            |                                                                                                                                                                                                                                                                                                                                                                                                                                                   |            |
| 49 |                                        |                                                            |                                                                                                                                                                                                                                                                                                                                                                                                                                                   |            |
| 50 |                                        |                                                            |                                                                                                                                                                                                                                                                                                                                                                                                                                                   |            |
| 51 |                                        |                                                            |                                                                                                                                                                                                                                                                                                                                                                                                                                                   |            |
| 52 |                                        |                                                            |                                                                                                                                                                                                                                                                                                                                                                                                                                                   |            |
| 53 |                                        |                                                            |                                                                                                                                                                                                                                                                                                                                                                                                                                                   |            |
| 54 |                                        |                                                            |                                                                                                                                                                                                                                                                                                                                                                                                                                                   |            |
| 55 |                                        |                                                            |                                                                                                                                                                                                                                                                                                                                                                                                                                                   |            |
| 56 |                                        |                                                            |                                                                                                                                                                                                                                                                                                                                                                                                                                                   |            |
| 57 |                                        |                                                            |                                                                                                                                                                                                                                                                                                                                                                                                                                                   |            |
| 58 |                                        |                                                            |                                                                                                                                                                                                                                                                                                                                                                                                                                                   |            |
| 59 |                                        |                                                            |                                                                                                                                                                                                                                                                                                                                                                                                                                                   |            |
| 60 |                                        |                                                            |                                                                                                                                                                                                                                                                                                                                                                                                                                                   |            |



**RESULTS†**

|                                          |           |                                                                                                                                                                                                                                                                                                                                                                                                                                                              |                  |
|------------------------------------------|-----------|--------------------------------------------------------------------------------------------------------------------------------------------------------------------------------------------------------------------------------------------------------------------------------------------------------------------------------------------------------------------------------------------------------------------------------------------------------------|------------------|
| Study selection                          | 17        | Give numbers of studies screened, assessed for eligibility, and included in the review, with reasons for exclusions at each stage, ideally with a flow diagram.                                                                                                                                                                                                                                                                                              | P.8              |
| <b>Presentation of network structure</b> | <b>S3</b> | Provide a network graph of the included studies to enable visualization of the geometry of the treatment network.                                                                                                                                                                                                                                                                                                                                            | <b>P.10-P.12</b> |
| <b>Summary of network geometry</b>       | <b>S4</b> | Provide a brief overview of characteristics of the treatment network. This may include commentary on the abundance of trials and randomized patients for the different interventions and pairwise comparisons in the network, gaps of evidence in the treatment network, and potential biases reflected by the network structure.                                                                                                                            | <b>P.10-P.12</b> |
| Study characteristics                    | 18        | For each study, present characteristics for which data were extracted (e.g., study size, PICOS, follow-up period) and provide the citations.                                                                                                                                                                                                                                                                                                                 | P.9-P.10         |
| Risk of bias within studies              | 19        | Present data on risk of bias of each study and, if available, any outcome level assessment.                                                                                                                                                                                                                                                                                                                                                                  | P.9-P.10         |
| Results of individual studies            | 20        | For all outcomes considered (benefits or harms), present, for each study: 1) simple summary data for each intervention group, and 2) effect estimates and confidence intervals. <i>Modified approaches may be needed to deal with information from larger networks.</i>                                                                                                                                                                                      | <b>P.10-P.12</b> |
| Synthesis of results                     | 21        | Present results of each meta-analysis done, including confidence/credible intervals. <i>In larger networks, authors may focus on comparisons versus a particular comparator (e.g. placebo or standard care), with full findings presented in an appendix. League tables and forest plots may be considered to summarize pairwise comparisons.</i> If additional summary measures were explored (such as treatment rankings), these should also be presented. | <b>P.10-P.12</b> |
| <b>Exploration for inconsistency</b>     | <b>S5</b> | Describe results from investigations of inconsistency. This may include such information as measures of model fit to compare consistency and inconsistency models, <i>P</i> values from statistical tests, or summary of inconsistency estimates from different parts of the treatment network.                                                                                                                                                              | <b>P.10-P.12</b> |
| Risk of bias across studies              | 22        | Present results of any assessment of risk of bias across studies for the evidence base being studied.                                                                                                                                                                                                                                                                                                                                                        | P.10-P.12        |
| Results of additional analyses           | 23        | Give results of additional analyses, if done (e.g., sensitivity or subgroup analyses, meta-regression analyses, <i>alternative network geometries studied, alternative choice of prior distributions for Bayesian analyses, and so forth</i> ).                                                                                                                                                                                                              | <i>n/a</i>       |
| <b>DISCUSSION</b>                        |           |                                                                                                                                                                                                                                                                                                                                                                                                                                                              |                  |
| Summary of evidence                      | 24        | Summarize the main findings, including the strength of evidence for each main outcome; consider their relevance to key groups (e.g., healthcare providers, users, and policy-makers).                                                                                                                                                                                                                                                                        | P.12             |

|    |                |    |                                                                                                                                                                                                                                                                                                                                                                                                                                |             |
|----|----------------|----|--------------------------------------------------------------------------------------------------------------------------------------------------------------------------------------------------------------------------------------------------------------------------------------------------------------------------------------------------------------------------------------------------------------------------------|-------------|
| 1  | Limitations    | 25 | Discuss limitations at study and outcome level (e.g., risk of bias), and at review level (e.g., incomplete retrieval of identified research, reporting bias). <i>Comment on the validity of the assumptions, such as transitivity and consistency. Comment on any concerns regarding network geometry (e.g., avoidance of certain comparisons).</i>                                                                            | P.15        |
| 2  |                |    |                                                                                                                                                                                                                                                                                                                                                                                                                                |             |
| 3  |                |    |                                                                                                                                                                                                                                                                                                                                                                                                                                |             |
| 4  |                |    |                                                                                                                                                                                                                                                                                                                                                                                                                                |             |
| 5  |                |    |                                                                                                                                                                                                                                                                                                                                                                                                                                |             |
| 6  |                |    |                                                                                                                                                                                                                                                                                                                                                                                                                                |             |
| 7  |                |    |                                                                                                                                                                                                                                                                                                                                                                                                                                |             |
| 8  | Conclusions    | 26 | Provide a general interpretation of the results in the context of other evidence, and implications for future research.                                                                                                                                                                                                                                                                                                        | P.16        |
| 9  |                |    |                                                                                                                                                                                                                                                                                                                                                                                                                                |             |
| 10 |                |    |                                                                                                                                                                                                                                                                                                                                                                                                                                |             |
| 11 | <b>FUNDING</b> |    |                                                                                                                                                                                                                                                                                                                                                                                                                                |             |
| 12 | Funding        | 27 | Describe sources of funding for the systematic review and other support (e.g., supply of data); role of funders for the systematic review. This should also include information regarding whether funding has been received from manufacturers of treatments in the network and/or whether some of the authors are content experts with professional conflicts of interest that could affect use of treatments in the network. | <b>P.16</b> |
| 13 |                |    |                                                                                                                                                                                                                                                                                                                                                                                                                                |             |
| 14 |                |    |                                                                                                                                                                                                                                                                                                                                                                                                                                |             |
| 15 |                |    |                                                                                                                                                                                                                                                                                                                                                                                                                                |             |
| 16 |                |    |                                                                                                                                                                                                                                                                                                                                                                                                                                |             |
| 17 |                |    |                                                                                                                                                                                                                                                                                                                                                                                                                                |             |
| 18 |                |    |                                                                                                                                                                                                                                                                                                                                                                                                                                |             |
| 19 |                |    |                                                                                                                                                                                                                                                                                                                                                                                                                                |             |
| 20 |                |    |                                                                                                                                                                                                                                                                                                                                                                                                                                |             |

PICOS = population, intervention, comparators, outcomes, study design.
