# Supplementary material for: Effectiveness of lipid-lowering therapy on mortality and major adverse cardiovascular event outcomes in patients undergoing percutaneous coronary intervention: a network meta-analysis of randomised controlled trials
Source: PubMed Central journal article supplement — BMJ Open. 2023 Nov 15;13(11):e070827. doi: 10.1136/bmjopen-2022-070827 (PMC10660972; doi:10.1136/bmjopen-2022-070827), 2023-11-15
Supplement: bmjopen-2022-070827supp001.pdf [file bmjopen-2022-070827supp001.pdf]

### The full search strategy for all databases.

a. The search query used in PubMed database without language or other additional limits.

| Search number | Query                                                                                                                                                                                                                                                                                                                                          | Results   |
|---------------|------------------------------------------------------------------------------------------------------------------------------------------------------------------------------------------------------------------------------------------------------------------------------------------------------------------------------------------------|-----------|
| 4             | ((#1) AND (#2)) AND (#3)                                                                                                                                                                                                                                                                                                                       | 553       |
| 3             | Random* or randomized or randomised                                                                                                                                                                                                                                                                                                            | 1,591,835 |
| 2             | "percutaneous coronary intervention" OR "Coronary angioplasty"                                                                                                                                                                                                                                                                                 | 61,003    |
| 1             | Statin or Simvastatin or Rosuvastatin or Atorvastatin or Fluvastatin or Lovastatin or Pravastatin or Mevastatin or ezetimibe or "Icosapent Ethyl" or "Bempedoic acid" or fibrate or evolocumab or Alirocumab or evinacumab or Volanesorsen or Vupanorsen or Pelacarsen or Olezarsen or Pelacarsen or Inclisiran or olpasiran or Lipid-lowering | 88,902    |

b. The search strategy used in EmBase database without language or other additional limits.

| No. | Query                                                                                                                                                                                                                                                                                                                                                                                                                                                                                                                                                                                                                                                                                                                                                                                                                                                                                                                                                                                                      | Results |
|-----|------------------------------------------------------------------------------------------------------------------------------------------------------------------------------------------------------------------------------------------------------------------------------------------------------------------------------------------------------------------------------------------------------------------------------------------------------------------------------------------------------------------------------------------------------------------------------------------------------------------------------------------------------------------------------------------------------------------------------------------------------------------------------------------------------------------------------------------------------------------------------------------------------------------------------------------------------------------------------------------------------------|---------|
| #4  | #1 AND #2 AND #3                                                                                                                                                                                                                                                                                                                                                                                                                                                                                                                                                                                                                                                                                                                                                                                                                                                                                                                                                                                           | 1308    |
| #3  | random* OR randomized                                                                                                                                                                                                                                                                                                                                                                                                                                                                                                                                                                                                                                                                                                                                                                                                                                                                                                                                                                                      | 2080906 |
| #2  | percutaneous coronary intervention' OR 'coronary angioplasty'                                                                                                                                                                                                                                                                                                                                                                                                                                                                                                                                                                                                                                                                                                                                                                                                                                                                                                                                              | 131280  |
| #1  | 'statin'/exp OR statin OR 'simvastatin'/exp OR simvastatin OR 'rosuvastatin'/exp OR rosuvastatin OR 'atorvastatin'/exp OR atorvastatin OR 'fluvastatin'/exp OR fluvastatin OR 'lovastatin'/exp OR lovastatin OR 'pravastatin'/exp OR pravastatin OR 'pitavastatin'/exp OR pitavastatin OR 'mevastatin'/exp OR mevastatin OR 'ezetimibe'/exp OR ezetimibe OR 'icosapentaenoic acid'/exp OR 'icosapentaenoic acid' OR 'icosapent ethyl'/exp OR 'icosapent ethyl' OR 'bempedoic acid'/exp OR 'bempedoic acid' OR 'fibrate'/exp OR fibrate OR 'bezafibrate'/exp OR bezafibrate OR 'gemfibrozil'/exp OR gemfibrozil OR 'fenofibrate'/exp OR fenofibrate OR 'ciprofibrate'/exp OR ciprofibrate OR 'evolocumab'/exp OR evolocumab OR 'alirocumab'/exp OR alirocumab OR evinacumab OR 'volanesorsen'/exp OR volanesorsen OR 'vupanorsen'/exp OR vupanorsen OR 'pelacarsen'/exp OR pelacarsen OR 'olezarsen'/exp OR olezarsen OR 'inclisiran'/exp OR inclisiran OR 'olpasiran'/exp OR olpasiran OR 'lipid lowering' | 167569  |

c. The search strategy used in Cochrane library database without language or other additional limits.

| ID | Search | Hits |
|----|--------|------|
|----|--------|------|

|    |                                                                                                                                                                                                                                                                                                                                                                                                                                            |         |
|----|--------------------------------------------------------------------------------------------------------------------------------------------------------------------------------------------------------------------------------------------------------------------------------------------------------------------------------------------------------------------------------------------------------------------------------------------|---------|
| #1 | (Statin OR Simvastatin OR Rosuvastatin OR Atorvastatin OR Fluvastatin OR Lovastatin OR Pravastatin OR Pitavastatin or Mevastatin OR ezetimibe OR "Eicosapentaenoic Acid" OR "Icosapent Ethyl" OR "Bempedoic acid" OR Fibrate OR Bezafibrate OR Gemfibrozil OR Fenofibrate OR Ciprofibrate OR Evolocumab OR Alirocumab OR Evinacumab OR Volanesorsen OR Vupanorsen OR Pelacarsen OR Olezarsen OR Inclisiran OR Olpasiran OR Lipid-lowering) | 19395   |
| #2 | "Percutaneous coronary intervention" OR "Coronary angioplasty"                                                                                                                                                                                                                                                                                                                                                                             | 13623   |
| #3 | Random* OR randomized                                                                                                                                                                                                                                                                                                                                                                                                                      | 1346916 |
| #4 | #1 AND #2 AND #3                                                                                                                                                                                                                                                                                                                                                                                                                           | 690     |
